# Supplementary material for: Using bioinformatics and metabolomics to identify altered granulosa cells in patients with diminished ovarian reserve
Source: PeerJ. 2020 Aug 28;8:e9812. doi: 10.7717/peerj.9812 (PMC7457930; doi:10.7717/peerj.9812)
Supplement: Supplemental Information 6 [file peerj-08-9812-s006.xlsx]

## Sheet: identification-positive
Compound.ID	ratio	t.test_p.value	t.test_p.value_BHcorrect	sample	LCplatform	Name	Formula	Molecular.Weight	Actual.RT	KEGG.ID	ID	HMDB.ID	DeltaMass..Da.	DeltaMass..ppm.	ChemSpider.Results	Super.class	Class	Sub.class	label
0.524_293.1106	1344.38	0.4144	0.4973	DOR:NOR	C18:pos	N-acetylmuramic acid	C11 H19 N O8	293.111	0.524	C02713	S4575341	HMDB0060493	5e-04	1.606	2	Organic oxygen compounds	Organooxygen compounds	Carbohydrates and carbohydrate conjugates	other
0.526_424.191	286.542	0.4127	0.4965	DOR:NOR	C18:pos	NA	C14 H28 N6 O9	424.191	0.526	NA	NA	NA	NA	NA	0	NA	NA	NA	other
0.527_337.1362	70.6884	0.4203	0.4997	DOR:NOR	C18:pos	NA	NA	337.136	0.527	NA	NA	NA	NA	NA	0	NA	NA	NA	other
0.527_599.2753	5771.1	0.4155	0.4974	DOR:NOR	C18:pos	NA	C23 H48 N5 O7 P3	599.275	0.527	NA	NA	NA	NA	NA	0	NA	NA	NA	other
0.531_100.016	54.7995	0.3393	0.4473	DOR:NOR	C18:pos	Succinic anhydride	C4 H4 O3	100.016	0.531	C19524	S7634	HMDB0032523	0	0.4583	1	Organoheterocyclic compounds	Oxolanes	null	other
0.531_144.0423	12.1865	0.3159	0.4412	DOR:NOR	C18:pos	Dimethyl maleate	C6 H8 O4	144.042	0.531	NA	S4436352	HMDB0031257	-1e-04	-0.4217	8	Lipids and lipid-like molecules	Fatty Acyls	Fatty acid esters	other
0.531_351.1519	196.893	0.4122	0.4965	DOR:NOR	C18:pos	NA	C14 H25 N O9	351.152	0.531	NA	NA	NA	NA	NA	0	NA	NA	NA	other
0.532_84.0211	31.9352	0.3466	0.4502	DOR:NOR	C18:pos	Lu3453000	C4 H4 O2	84.0211	0.532	NA	S9917	HMDB0032330	0	-0.2007	2	Organoheterocyclic compounds	Dihydrofurans	Furanones	other
0.533_175.0846	1853.51	0.3798	0.4718	DOR:NOR	C18:pos	Apm	C7 H13 N O4	175.085	0.533	NA	S91360	HMDB0034252	-1e-04	-0.6067	5	Organic acids and derivatives	Carboxylic acids and derivatives	Amino acids, peptides, and analogues	other
0.533_193.0951	562.214	0.4157	0.4974	DOR:NOR	C18:pos	NA	C7 H15 N O5	193.095	0.533	NA	NA	NA	NA	NA	0	NA	NA	NA	other
0.533_235.1054	284.696	0.4152	0.4973	DOR:NOR	C18:pos	NA	C9 H17 N O6	235.105	0.533	NA	NA	NA	NA	NA	0	NA	NA	NA	other
0.533_438.2068	1299.91	0.4163	0.4978	DOR:NOR	C18:pos	NA	C15 H30 N6 O9	438.207	0.533	NA	NA	NA	NA	NA	0	NA	NA	NA	other
0.534_114.0317	47.7252	0.3325	0.4441	DOR:NOR	C18:pos	3635	C5 H6 O3	114.032	0.534	NA	S3757733	HMDB0031859	0	0.2561	2	Organoheterocyclic compounds	Dihydrofurans	Furanones	other
0.534_262.1387	11459	0.4178	0.4984	DOR:NOR	C18:pos	NA	C8 H18 N6 O4	262.139	0.534	NA	NA	NA	NA	NA	0	NA	NA	NA	other
0.534_275.1001	134.373	0.4084	0.4929	DOR:NOR	C18:pos	NA	C11 H17 N O7	275.1	0.534	NA	NA	NA	NA	NA	0	NA	NA	NA	other
0.534_307.1268	7008.34	0.4209	0.5003	DOR:NOR	C18:pos	3-(2-deoxy-beta-d-erythro-pentofuranosyl)-4,6,7,8-tetrahydropyrimido[1,2-a]purin-10(3h)-one	C13 H17 N5 O4	307.127	0.534	NA	S4588654	HMDB0059780	0.0012	3.9198	1	Nucleosides, nucleotides, and analogues	Nucleoside and nucleotide analogues	null	other
0.534_396.1847	304.159	0.4152	0.4973	DOR:NOR	C18:pos	NA	C14 H28 N4 O9	396.185	0.534	NA	NA	NA	NA	NA	0	NA	NA	NA	other
0.534_557.2531	295.817	0.4152	0.4973	DOR:NOR	C18:pos	NA	C20 H39 N5 O13	557.253	0.534	NA	NA	NA	NA	NA	0	NA	NA	NA	other
0.534_613.2899	18875.5	0.4177	0.4984	DOR:NOR	C18:pos	NA	C24 H50 N5 O7 P3	613.29	0.534	NA	NA	NA	NA	NA	0	NA	NA	NA	other
0.534_98.0367	169.969	0.3705	0.4642	DOR:NOR	C18:pos	2491	C5 H6 O2	98.0367	0.534	C20441	S7083	HMDB0013742	0	0.2717	3	Organoheterocyclic compounds	Heteroaromatic compounds	null	other
0.537_627.306	100.93	0.4192	0.4989	DOR:NOR	C18:pos	NA	C25 H52 N5 O7 P3	627.306	0.537	NA	NA	NA	NA	NA	0	NA	NA	NA	other
0.55_130.063	16.0994	0.3225	0.4414	DOR:NOR	C18:pos	Ethyl acetoacetate	C6 H10 O3	130.063	0.55	NA	S13865426	HMDB0031216	0	-0.3499	15	Organic acids and derivatives	Keto acids and derivatives	Beta-keto acids and derivatives	other
0.556_131.991	0.9493	0.9227	0.9345	DOR:NOR	C18:pos	NA	C3 H5 N2 P S	131.991	0.556	NA	NA	NA	NA	NA	0	NA	NA	NA	other
0.556_150.028	1.0678	0.6678	0.7198	DOR:NOR	C18:pos	NA	C3 H6 N2 O5	150.028	0.556	NA	NA	NA	NA	NA	0	NA	NA	NA	other
0.557_129.0096	0.9975	0.8583	0.8805	DOR:NOR	C18:pos	3-amino-6-chloropyridazine	C4 H4 Cl N3	129.01	0.557	NA	S20342	HMDB0062200	-2e-04	-1.498	1	Organoheterocyclic compounds	Diazines	Pyridazines and derivatives	other
0.557_141.0277	0.8811	0.7868	0.8201	DOR:NOR	C18:pos	NA	C2 H7 N O6	141.028	0.557	NA	NA	NA	NA	NA	0	NA	NA	NA	other
0.557_142.9518	1.3556	0.4708	0.5466	DOR:NOR	C18:pos	NA	NA	142.952	0.557	NA	NA	NA	NA	NA	0	NA	NA	NA	other
0.558_102.1157	1.0478	0.6749	0.7261	DOR:NOR	C18:pos	Cadaverine	C5 H14 N2	102.116	0.558	C01672	S13866593	HMDB0002322	0	-0.1649	3	Organic nitrogen compounds	Organonitrogen compounds	Amines	other
0.559_71.0737	0.2671	0.389	0.4767	DOR:NOR	C18:pos	Pyrrolidine	C4 H9 N	71.0737	0.559	NA	S29008	HMDB0031641	-2e-04	-2.6128	1	Organoheterocyclic compounds	Pyrrolidines	null	other
0.56_116.1314	0.2515	0.8194	0.8462	DOR:NOR	C18:pos	NA	C6 H16 N2	116.131	0.56	NA	NA	NA	NA	NA	0	NA	NA	NA	other
0.563_148.9456	1.1836	0.6094	0.6679	DOR:NOR	C18:pos	NA	C H2 N3 P3	148.946	0.563	NA	NA	NA	NA	NA	0	NA	NA	NA	other
0.563_152.9412	1.0447	0.963	0.9676	DOR:NOR	C18:pos	NA	NA	152.941	0.563	NA	NA	NA	NA	NA	0	NA	NA	NA	other
0.57_145.158	6.6971	0.0495	0.2178	DOR:NOR	C18:pos	Spermidine	C7 H19 N3	145.158	0.57	C00315	S1071	HMDB0001257	-1e-04	-0.4326	1	Organic nitrogen compounds	Organonitrogen compounds	Amines	up
0.57_156.1628	0.8243	0.7343	0.7779	DOR:NOR	C18:pos	NA	C9 H20 N2	156.163	0.57	NA	NA	NA	NA	NA	0	NA	NA	NA	other
0.576_85.0892	2.2996	0.5651	0.6312	DOR:NOR	C18:pos	2908	C5 H11 N	85.0892	0.576	C01746	S7791	HMDB0034301	0	-0.5063	1	Organoheterocyclic compounds	Piperidines	null	other
0.58_83.0736	0.1355	0.1071	0.3291	DOR:NOR	C18:pos	Yv8195000	C5 H9 N	83.0736	0.58	NA	S7770	HMDB0040173	-1e-04	-1.6458	2	Organonitrogen compounds	Nitriles	null	other
0.581_129.079	0.0332	0.0071	0.0827	DOR:NOR	C18:pos	Pipecolate	C6 H11 N O2	129.079	0.581	C00408	BGI478	NA	0	-0.1918	11	Organic acids and derivatives	Carboxylic acids and derivatives	Amino acids, peptides, and analogues	down
0.581_146.1057	0.0326	0.008	0.0853	DOR:NOR	C18:pos	Dl-lysine	C6 H14 N2 O2	146.106	0.581	C16440	M482	NA	-2e-04	-1.3238	5	Organic acids and derivatives	Carboxylic acids and derivatives	Amino acids, peptides, and analogues	down
0.584_187.1685	0.2376	0.0676	0.2509	DOR:NOR	C18:pos	N8-acetylspermidine	C9 H21 N3 O	187.168	0.584	C01029	M503	NA	0	-0.2662	2	Organic acids and derivatives	Carboximidic acids and derivatives	Carboximidic acids	other
0.586_138.1133	0.1633	0.8031	0.8333	DOR:NOR	C18:pos	NA	NA	138.113	0.586	NA	NA	NA	NA	NA	0	NA	NA	NA	other
0.591_603.2472	55.9911	0.3569	0.4557	DOR:NOR	C18:pos	NA	C26 H41 N3 O11 S	603.247	0.591	NA	NA	NA	NA	NA	0	NA	NA	NA	other
0.593_252.902	1.7062	0.1823	0.3915	DOR:NOR	C18:pos	NA	C3 H2 N3 O3 P3 S	252.902	0.593	NA	NA	NA	NA	NA	0	NA	NA	NA	other
0.593_635.2722	39.4945	0.3521	0.4522	DOR:NOR	C18:pos	NA	C25 H50 N O13 P S	635.272	0.593	NA	NA	NA	NA	NA	0	NA	NA	NA	other
0.596_168.0876	0.0319	0.0077	0.0849	DOR:NOR	C18:pos	NA	NA	168.088	0.596	NA	NA	NA	NA	NA	0	NA	NA	NA	down
0.596_242.9342	1.4878	0.0793	0.2749	DOR:NOR	C18:pos	NA	C4 H7 N O3 P2 S2	242.934	0.596	NA	NA	NA	NA	NA	0	NA	NA	NA	other
0.598_139.061	1.4374	0.4099	0.4943	DOR:NOR	C18:pos	NA	NA	139.061	0.598	NA	NA	NA	NA	NA	0	NA	NA	NA	other
0.599_326.0437	0.0358	0.0048	0.0702	DOR:NOR	C18:pos	3,8-dihydroxy-6-oxo-6h-[1]benzofuro[3,2-c]chromen-9-yl acetate	C17 H10 O7	326.044	0.599	NA	S74852229	HMDB0128436	-0.001	-3.0773	6	Phenylpropanoids and polyketides	Isoflavonoids	Coumestans	down
0.6_394.031	0.0661	0.0219	0.1446	DOR:NOR	C18:pos	NA	C7 H16 N4 O11 P2	394.031	0.6	NA	NA	NA	NA	NA	0	NA	NA	NA	down
0.6_462.0187	0.0638	0.0157	0.1201	DOR:NOR	C18:pos	NA	C10 H16 N4 O13 P2	462.019	0.6	NA	NA	NA	NA	NA	0	NA	NA	NA	down
0.601_530.0068	0.0363	0.0117	0.1019	DOR:NOR	C18:pos	NA	C8 H16 N6 O17 P2	530.007	0.601	NA	NA	NA	NA	NA	0	NA	NA	NA	down
0.601_665.9798	0.1073	0.0279	0.1648	DOR:NOR	C18:pos	NA	C21 H10 N6 O18 S	665.98	0.601	NA	NA	NA	NA	NA	0	NA	NA	NA	down
0.603_597.9935	0.0521	0.0217	0.1439	DOR:NOR	C18:pos	NA	C22 H13 N6 O9 P3	597.994	0.603	NA	NA	NA	NA	NA	0	NA	NA	NA	down
0.605_160.1212	0.3688	0.2579	0.4133	DOR:NOR	C18:pos	N6-methyllysine	C7 H16 N2 O2	160.121	0.605	NA	S144469	HMDB0002038	0	-0.0669	2	Organic acids and derivatives	Carboxylic acids and derivatives	Amino acids, peptides, and analogues	other
0.607_188.1526	0.0323	0.048	0.2141	DOR:NOR	C18:pos	Nepsilon,nepsilon,nepsilon-trimethyllysine	C9 H20 N2 O2	188.153	0.607	C03793	BGI429	NA	-1e-04	-0.6221	1	Organic acids and derivatives	Carboxylic acids and derivatives	Amino acids, peptides, and analogues	down
0.607_751.9028	0.1177	0.0409	0.1942	DOR:NOR	C18:pos	NA	C24 H11 N4 O17 P3 S	751.903	0.607	NA	NA	NA	NA	NA	0	NA	NA	NA	down
0.608_155.0696	0.0805	0.0576	0.2347	DOR:NOR	C18:pos	L-histidine	C6 H9 N3 O2	155.07	0.608	C00135	M473	NA	-1e-04	-0.8811	2	Organic acids and derivatives	Carboxylic acids and derivatives	Amino acids, peptides, and analogues	other
0.615_174.1369	0.214	0.1021	0.3226	DOR:NOR	C18:pos	N~6~,n~6~-dimethyllysine	C8 H18 N2 O2	174.137	0.615	NA	S3676766	HMDB0013287	0	-0.2834	1	Organic acids and derivatives	Carboxylic acids and derivatives	Amino acids, peptides, and analogues	other
0.616_218.0756	0.0982	0.099	0.3177	DOR:NOR	C18:pos	NA	C5 H10 N6 O4	218.076	0.616	NA	NA	NA	NA	NA	0	NA	NA	NA	other
0.617_196.0937	0.0905	0.0483	0.215	DOR:NOR	C18:pos	NA	C7 H16 O6	196.094	0.617	NA	NA	NA	NA	NA	0	NA	NA	NA	down
0.617_701.8539	1.6074	0.1322	0.3602	DOR:NOR	C18:pos	NA	NA	701.854	0.617	NA	NA	NA	NA	NA	0	NA	NA	NA	other
0.618_300.1334	1.614	0.0631	0.2451	DOR:NOR	C18:pos	NA	C15 H27 P3	300.133	0.618	NA	NA	NA	NA	NA	0	NA	NA	NA	other
0.619_286.0626	0.0953	0.0098	0.0926	DOR:NOR	C18:pos	NA	C11 H14 N2 O5 S	286.063	0.619	NA	NA	NA	NA	NA	0	NA	NA	NA	down
0.619_408.1966	14.3583	0.2897	0.4316	DOR:NOR	C18:pos	(6beta,8xi,11beta,14xi,16alpha)-9-fluoro-6,11,17,21-tetrahydroxy-16-methylpregna-1,4-diene-3,20-dione	C22 H29 F O6	408.197	0.619	NA	S59662747	HMDB0061022	-0.0017	-4.229	1	Lipids and lipid-like molecules	Steroids and steroid derivatives	Hydroxysteroids	other
0.624_354.0497	0.0446	0.0037	0.0609	DOR:NOR	C18:pos	NA	C8 H15 N6 O6 P S	354.05	0.624	NA	NA	NA	NA	NA	0	NA	NA	NA	down
0.624_717.828	1.7749	0.4054	0.4898	DOR:NOR	C18:pos	NA	C19 H5 N4 O17 P3 S2	717.828	0.624	NA	NA	NA	NA	NA	0	NA	NA	NA	other
0.624_905.8158	1.7117	0.1696	0.3897	DOR:NOR	C18:pos	NA	NA	905.816	0.624	NA	NA	NA	NA	NA	0	NA	NA	NA	other
0.625_157.9568	1.8212	0.0932	0.3065	DOR:NOR	C18:pos	NA	NA	157.957	0.625	NA	NA	NA	NA	NA	0	NA	NA	NA	other
0.625_225.9441	1.856	0.1016	0.3219	DOR:NOR	C18:pos	(2e)-2,5-dichloro-4-oxo-2-hexenedioic acid	C6 H4 Cl2 O5	225.944	0.625	C12835	S4445367	HMDB0060363	-6e-04	-2.4388	1	Organic acids and derivatives	Keto acids and derivatives	Medium-chain keto acids and derivatives	other
0.625_293.9312	1.9538	0.0843	0.2857	DOR:NOR	C18:pos	NA	C3 H8 N2 O6 P2 S2	293.931	0.625	NA	NA	NA	NA	NA	0	NA	NA	NA	other
0.625_361.9185	1.9422	0.0915	0.3028	DOR:NOR	C18:pos	NA	C6 H8 N2 O8 P2 S2	361.918	0.625	NA	NA	NA	NA	NA	0	NA	NA	NA	other
0.625_565.8806	1.9157	0.1097	0.3329	DOR:NOR	C18:pos	NA	NA	565.881	0.625	NA	NA	NA	NA	NA	0	NA	NA	NA	other
0.625_649.8415	1.8307	0.462	0.5389	DOR:NOR	C18:pos	NA	C8 H9 N6 O17 P3 S3	649.841	0.625	NA	NA	NA	NA	NA	0	NA	NA	NA	other
0.626_173.9308	1.8605	0.4024	0.4875	DOR:NOR	C18:pos	NA	C H4 O4 P2 S	173.931	0.626	NA	NA	NA	NA	NA	0	NA	NA	NA	other
0.626_377.8924	1.7625	0.3953	0.4811	DOR:NOR	C18:pos	NA	C9 H4 N2 O7 P2 S2	377.892	0.626	NA	NA	NA	NA	NA	0	NA	NA	NA	other
0.626_429.906	1.9073	0.1023	0.3226	DOR:NOR	C18:pos	NA	C9 H3 O18 P	429.906	0.626	NA	NA	NA	NA	NA	0	NA	NA	NA	other
0.626_445.8799	1.8172	0.3762	0.47	DOR:NOR	C18:pos	NA	C3 H4 N4 O16 P2 S	445.88	0.626	NA	NA	NA	NA	NA	0	NA	NA	NA	other
0.626_497.8938	1.8857	0.11	0.3331	DOR:NOR	C18:pos	NA	C5 H3 N6 O18 P S	497.894	0.626	NA	NA	NA	NA	NA	0	NA	NA	NA	other
0.626_513.8678	1.8155	0.3313	0.4436	DOR:NOR	C18:pos	NA	C3 H9 N4 O16 P3 S2	513.868	0.626	NA	NA	NA	NA	NA	0	NA	NA	NA	other
0.627_309.9051	1.7804	0.4018	0.487	DOR:NOR	C18:pos	NA	C2 H4 N2 O10 P2 S	309.905	0.627	NA	NA	NA	NA	NA	0	NA	NA	NA	other
0.629_366.1743	17.6775	0.2966	0.4355	DOR:NOR	C18:pos	NA	C13 H26 N4 O8	366.174	0.629	NA	NA	NA	NA	NA	0	NA	NA	NA	other
0.63_1042.1244	1.837	0.0582	0.2349	DOR:NOR	C18:pos	NA	NA	1042.12	0.63	NA	NA	NA	NA	NA	0	NA	NA	NA	other
0.63_581.8546	1.6501	0.4537	0.5314	DOR:NOR	C18:pos	NA	C9 H5 N4 O18 P3 S	581.855	0.63	NA	NA	NA	NA	NA	0	NA	NA	NA	other
0.631_974.1377	2.211	0.1629	0.3874	DOR:NOR	C18:pos	NA	NA	974.138	0.631	NA	NA	NA	NA	NA	0	NA	NA	NA	other
0.632_174.1118	0.0343	0.0115	0.1013	DOR:NOR	C18:pos	L-arginine	C6 H14 N4 O2	174.112	0.632	C00062	BGI343	NA	-1e-04	-0.8155	2	Organic acids and derivatives	Carboxylic acids and derivatives	Amino acids, peptides, and analogues	down
0.635_257.8917	2.2921	0.742	0.7831	DOR:NOR	C18:pos	NA	C3 H2 Cl N2 O4 P3	257.892	0.635	NA	NA	NA	NA	NA	0	NA	NA	NA	other
0.639_103.0998	0.1302	0.0424	0.1972	DOR:NOR	C18:pos	Choline	C5 H13 N O	103.1	0.639	C00114	M886	NA	-1e-04	-0.7643	0	Organic nitrogen compounds	Organonitrogen compounds	Quaternary ammonium salts	down
0.642_163.9133	55.6599	0.3167	0.4412	DOR:NOR	C18:pos	NA	NA	163.913	0.642	NA	NA	NA	NA	NA	0	NA	NA	NA	other
0.643_435.872	3.1203	0.2198	0.4006	DOR:NOR	C18:pos	NA	C7 H2 O18 P2	435.872	0.643	NA	NA	NA	NA	NA	0	NA	NA	NA	other
0.644_121.074	0.5722	0.4703	0.5462	DOR:NOR	C18:pos	Tris(hydroxymethyl)aminomethane	C4 H11 N O3	121.074	0.644	NA	S6257	HMDB0240288	-1e-04	-0.7747	1	Organic compounds	Organic nitrogen compounds	Organonitrogen compounds	other
0.645_572.2535	30.8406	0.2359	0.404	DOR:NOR	C18:pos	NA	C21 H40 N4 O14	572.254	0.645	NA	NA	NA	NA	NA	0	NA	NA	NA	other
0.651_161.1053	0.138	0.0601	0.2384	DOR:NOR	C18:pos	Dl-carnitine	C7 H15 N O3	161.105	0.651	NA	S282	HMDB0062496	-1e-04	-0.5801	2	Organic nitrogen compounds	Organonitrogen compounds	Quaternary ammonium salts	other
0.651_243.8631	10.5899	0.1321	0.3602	DOR:NOR	C18:pos	NA	C4 H2 Cl O2 P S3	243.863	0.651	NA	NA	NA	NA	NA	0	NA	NA	NA	other
0.653_105.0427	0.0348	0.0097	0.0922	DOR:NOR	C18:pos	L-serine	C3 H7 N O3	105.043	0.653	C00065	BGI378	NA	-1e-04	-0.6425	3	Organic acids and derivatives	Carboxylic acids and derivatives	Amino acids, peptides, and analogues	down
0.653_180.0636	0.3413	0.2046	0.4002	DOR:NOR	C18:pos	D-fructose	C6 H12 O6	180.064	0.653	C02336	BGI13	NA	-2e-04	-1.2471	30	Organic oxygen compounds	Organooxygen compounds	Carbohydrates and carbohydrate conjugates	other
0.654_240.0235	0.035	0.0897	0.2996	DOR:NOR	C18:pos	L-cystine	C6 H12 N2 O4 S2	240.024	0.654	C00491	S60997	HMDB0000192	4e-04	1.5161	1	Organic acids and derivatives	Carboxylic acids and derivatives	Amino acids, peptides, and analogues	other
0.655_127.0246	0.085	0.0138	0.1127	DOR:NOR	C18:pos	NA	NA	127.025	0.655	NA	NA	NA	NA	NA	0	NA	NA	NA	down
0.655_141.0191	0.0332	0.0149	0.1169	DOR:NOR	C18:pos	Phosphoryethanolamine	C2 H8 N O4 P	141.019	0.655	C00346	S990	HMDB0000224	0	-0.3457	1	Organic acids and derivatives	Organic phosphoric acids and derivatives	Phosphate esters	down
0.656_103.0634	0.1952	0.0355	0.185	DOR:NOR	C18:pos	Gamma-aminobutyric acid	C4 H9 N O2	103.063	0.656	C00334	S116	HMDB0000112	0	-0.3408	13	Organic acids and derivatives	Carboxylic acids and derivatives	Amino acids, peptides, and analogues	down
0.657_132.0536	0.0998	0.0592	0.2367	DOR:NOR	C18:pos	L-(-)-asparagine	C4 H8 N2 O3	132.054	0.657	C00152	S6031	HMDB0000168	-1e-04	-0.5743	5	Organic acids and derivatives	Carboxylic acids and derivatives	Amino acids, peptides, and analogues	other
0.657_133.0376	0.0212	0.0066	0.0799	DOR:NOR	C18:pos	D-aspartate	C4 H7 N O4	133.038	0.657	C00402	BGI209	NA	-1e-04	-0.6087	4	Organic acids and derivatives	Carboxylic acids and derivatives	Amino acids, peptides, and analogues	down
0.658_125.0148	0.0131	0.0014	0.0364	DOR:NOR	C18:pos	Taurine	C2 H7 N O3 S	125.015	0.658	C00245	S1091	HMDB0000251	-1e-04	-0.9035	1	Organic acids and derivatives	Organic sulfonic acids and derivatives	Organosulfonic acids and derivatives	down
0.658_163.1209	17.5725	0.1808	0.3915	DOR:NOR	C18:pos	NA	C7 H17 N O3	163.121	0.658	NA	NA	NA	NA	NA	0	NA	NA	NA	other
0.658_89.0478	0.0274	0.0116	0.1013	DOR:NOR	C18:pos	Β-alanine	C3 H7 N O2	89.0478	0.658	C00099	M599	NA	-2e-04	-1.7057	6	Organic acids and derivatives	Carboxylic acids and derivatives	Amino acids, peptides, and analogues	down
0.66_139.8963	72.9675	0.0145	0.1151	DOR:NOR	C18:pos	NA	NA	139.896	0.66	NA	NA	NA	NA	NA	0	NA	NA	NA	up
0.661_105.079	1.9173	0.2193	0.4006	DOR:NOR	C18:pos	Diethanolamine	C4 H11 N O2	105.079	0.661	C06772	S13835604	HMDB0004437	0	-0.3231	1	Organic nitrogen compounds	Organonitrogen compounds	Amines	other
0.661_282.011	0.0148	0.0304	0.1718	DOR:NOR	C18:pos	NA	C6 H12 N4 O3 P2 S	282.011	0.661	NA	NA	NA	NA	NA	0	NA	NA	NA	down
0.663_119.0582	0.0179	0.0135	0.1109	DOR:NOR	C18:pos	L-allo-threonine	C4 H9 N O3	119.058	0.663	C05519	BGI339	NA	0	0.1679	6	Organic acids and derivatives	Carboxylic acids and derivatives	Amino acids, peptides, and analogues	down
0.663_141.9409	2.4421	0.2303	0.4014	DOR:NOR	C18:pos	NA	NA	141.941	0.663	NA	NA	NA	NA	NA	0	NA	NA	NA	other
0.664_175.0957	0.0598	0.0224	0.1462	DOR:NOR	C18:pos	L-citrulline	C6 H13 N3 O3	175.096	0.664	C00327	BGI349	NA	0	0.2383	3	Organic acids and derivatives	Carboxylic acids and derivatives	Amino acids, peptides, and analogues	down
0.664_202.1429	0.0409	0.0579	0.2348	DOR:NOR	C18:pos	N3,n4-dimethyl-l-arginine	C8 H18 N4 O2	202.143	0.664	NA	M835	NA	1e-04	0.5254	2	NA	NA	NA	other
0.664_83.0371	0.0562	0.0304	0.1718	DOR:NOR	C18:pos	NA	C4 H5 N O	83.0371	0.664	NA	NA	NA	NA	NA	0	NA	NA	NA	down
0.665_129.0427	0.0619	0.0042	0.0658	DOR:NOR	C18:pos	Pyroglutamate	C5 H7 N O3	129.043	0.665	C01879	BGI491	NA	-1e-04	-0.6645	7	Organic acids and derivatives	Carboxylic acids and derivatives	Amino acids, peptides, and analogues	down
0.665_239.9176	2.7212	0.2374	0.4044	DOR:NOR	C18:pos	NA	NA	239.918	0.665	NA	NA	NA	NA	NA	0	NA	NA	NA	other
0.666_147.0532	0.0734	0.0518	0.2196	DOR:NOR	C18:pos	L-glutamic acid	C5 H9 N O4	147.053	0.666	C00025	M470	NA	0	0.0041	9	Organic acids and derivatives	Carboxylic acids and derivatives	Amino acids, peptides, and analogues	other
0.667_202.0454	0.2975	0.1302	0.3588	DOR:NOR	C18:pos	NA	C4 H6 N6 O4	202.045	0.667	NA	NA	NA	NA	NA	0	NA	NA	NA	other
0.67_341.8395	92.8884	0.0013	0.0362	DOR:NOR	C18:pos	NA	C6 H2 Cl N2 O3 P3 S2	341.839	0.67	NA	NA	NA	NA	NA	0	NA	NA	NA	up
0.671_158.0691	0.0621	0.035	0.1829	DOR:NOR	C18:pos	Methylol dimethylhydantoin	C6 H10 N2 O3	158.069	0.671	NA	S60357	HMDB0031670	0	0.0422	1	Organoheterocyclic compounds	Azolidines	Imidazolidines	down
0.673_165.0461	0.0464	0.1221	0.3482	DOR:NOR	C18:pos	L-methionine sulfoxide	C5 H11 N O3 S	165.046	0.673	C02989	M2246	NA	-1e-04	-0.6063	2	null	null	null	other
0.674_117.079	0.201	0.0411	0.1942	DOR:NOR	C18:pos	L-(+)-valine	C5 H11 N O2	117.079	0.674	C00183	S6050	HMDB0000883	0	-0.3854	7	Organic acids and derivatives	Carboxylic acids and derivatives	Amino acids, peptides, and analogues	down
0.674_149.1053	71.011	0.0283	0.1659	DOR:NOR	C18:pos	Triethanolamine	C6 H15 N O3	149.105	0.674	C06771	S13835630	HMDB0032538	-1e-04	-0.9195	1	Organonitrogen compounds	Amines	Alkanolamines	up
0.675_224.0084	0.0914	0.0264	0.1604	DOR:NOR	C18:pos	NA	C6 H9 O7 P	224.008	0.675	NA	NA	NA	NA	NA	0	NA	NA	NA	down
0.676_87.0684	4.5848	0.0194	0.1364	DOR:NOR	C18:pos	Morpholine	C4 H9 N O	87.0684	0.676	NA	S13837537	HMDB0031581	0	-0.4564	5	Organoheterocyclic compounds	Oxazinanes	Morpholines	up
0.678_359.8758	4.1358	0.1702	0.3907	DOR:NOR	C18:pos	NA	C2 H2 O17 P2	359.876	0.678	NA	NA	NA	NA	NA	0	NA	NA	NA	other
0.68_130.1108	0.1276	0.935	0.9443	DOR:NOR	C18:pos	N-acetylputrescine	C6 H14 N2 O	130.111	0.68	C02714	BGI425	NA	-2e-04	-1.2881	1	Organic acids and derivatives	Carboximidic acids and derivatives	Carboximidic acids	other
0.68_195.9537	0.9672	0.9509	0.957	DOR:NOR	C18:pos	NA	NA	195.954	0.68	NA	NA	NA	NA	NA	0	NA	NA	NA	other
0.68_85.0528	0.2654	0.914	0.9279	DOR:NOR	C18:pos	2-pyrrolidone	C4 H7 N O	85.0528	0.68	NA	S11530	HMDB0002039	0	-0.3789	2	Organoheterocyclic compounds	Pyrrolidines	Pyrrolidones	other
0.688_148.1212	0.2329	0.7708	0.807	DOR:NOR	C18:pos	NA	C6 H16 N2 O2	148.121	0.688	NA	NA	NA	NA	NA	0	NA	NA	NA	other
0.688_153.1266	271.755	0.1999	0.396	DOR:NOR	C18:pos	NA	C8 H15 N3	153.127	0.688	NA	NA	NA	NA	NA	0	NA	NA	NA	other
0.689_139.9875	0.0669	0.2032	0.3996	DOR:NOR	C18:pos	Phosphonoacetate	C2 H5 O5 P	139.988	0.689	C05682	S531	HMDB0004110	0	-0.3419	2	Organic acids and derivatives	Organic phosphonic acids and derivatives	Organic phosphonic acids	other
0.691_260.0292	0.1167	0	0.0071	DOR:NOR	C18:pos	Glucose 1-phosphate	C6 H13 O9 P	260.029	0.691	C11450	M1532	NA	5e-04	1.9449	21	NA	NA	NA	down
0.691_422.0817	0.0426	0.0024	0.0466	DOR:NOR	C18:pos	Trehalose 6-phosphate	C12 H23 O14 P	422.082	0.691	C00689	S109086	HMDB0001124	8e-04	1.9954	3	Organic oxygen compounds	Organooxygen compounds	Carbohydrates and carbohydrate conjugates	down
0.693_131.0696	0.0808	0.031	0.1721	DOR:NOR	C18:pos	Creatine	C4 H9 N3 O2	131.07	0.693	C00300	M357	NA	-2e-04	-1.2015	2	Organic acids and derivatives	Carboxylic acids and derivatives	Amino acids, peptides, and analogues	down
0.695_97.9771	0.9569	0.9402	0.9483	DOR:NOR	C18:pos	Phosphoric acid	H3 O4 P	97.9771	0.695	C00009	S979	HMDB0000973	-1e-04	-1.5039	1	Homogeneous non-metal compounds	Non-metal oxoanionic compounds	Non-metal phosphates	other
0.699_426.087	0.0102	0.0001	0.0106	DOR:NOR	C18:pos	(2s)-2-amino-5-({(2r)-3-[(2-amino-2-carboxyethyl)disulfanyl]-1-[(carboxymethyl)amino]-1-oxo-2-propanyl}amino)-5-oxopentanoic acid (non-preferred name)	C13 H22 N4 O8 S2	426.087	0.699	NA	S35013023	HMDB0000656	9e-04	2.1432	1	Organic acids and derivatives	Carboxylic acids and derivatives	Amino acids, peptides, and analogues	down
0.7_172.0348	0.1297	0.077	0.2703	DOR:NOR	C18:pos	NA	C3 H4 N6 O3	172.035	0.7	NA	NA	NA	NA	NA	0	NA	NA	NA	other
0.702_213.0436	0.0146	0.0001	0.0111	DOR:NOR	C18:pos	NA	C4 H13 N3 O3 P2	213.044	0.702	NA	NA	NA	NA	NA	0	NA	NA	NA	down
0.705_312.1347	0.1705	0.6912	0.7399	DOR:NOR	C18:pos	Letestuianin c	C19 H20 O4	312.135	0.705	NA	S7972558	HMDB0141087	0.0014	4.5391	14	Phenylpropanoids and polyketides	Diarylheptanoids	Linear diarylheptanoids	other
0.708_92.0475	1.4244	0.9776	0.9784	DOR:NOR	C18:pos	Glycerin	C3 H8 O3	92.0475	0.708	C00116	S733	HMDB0000131	-1e-04	-1.299	1	Organic oxygen compounds	Organooxygen compounds	Carbohydrates and carbohydrate conjugates	other
0.709_209.0722	2.0825	0.3831	0.4736	DOR:NOR	C18:pos	NA	C7 H15 N O4 S	209.072	0.709	NA	NA	NA	NA	NA	0	NA	NA	NA	other
0.711_324.1349	0.2125	0.113	0.3381	DOR:NOR	C18:pos	Glabridin	C20 H20 O4	324.135	0.711	NA	S3682058	HMDB0034188	0.0013	3.9326	15	Phenylpropanoids and polyketides	Isoflavonoids	Pyranoisoflavonoids	other
0.712_115.0635	0.128	0.0174	0.1271	DOR:NOR	C18:pos	L-proline	C5 H9 N O2	115.064	0.712	C16435	BGI376	NA	-1e-04	-1.243	6	null	null	null	down
0.712_268.1452	2.3519	0.2843	0.4299	DOR:NOR	C18:pos	4,4'-hex-3-ene-3,4-diyldiphenol	C18 H20 O2	268.145	0.712	NA	S2946	HMDB0014400	0.0012	4.3669	1	Phenylpropanoids and polyketides	Stilbenes	null	other
0.712_364.0973	2.6637	0.0896	0.2996	DOR:NOR	C18:pos	NA	C12 H21 N4 O5 P S	364.097	0.712	NA	NA	NA	NA	NA	0	NA	NA	NA	other
0.712_96.0214	0.4615	0.0226	0.1462	DOR:NOR	C18:pos	Furfural	C5 H4 O2	96.0214	0.712	C14279	S13863629	HMDB0032914	-2e-04	-2.5072	2	Organooxygen compounds	Carbonyl compounds	Aldehydes	down
0.713_232.1058	0.1905	0.1053	0.326	DOR:NOR	C18:pos	N(2)-succinyl-l-ornithine	C9 H16 N2 O5	232.106	0.713	C03415	S113025	HMDB0001199	1e-04	0.5202	7	Organic acids and derivatives	Carboxylic acids and derivatives	Amino acids, peptides, and analogues	other
0.714_142.0745	6.3049	0.9605	0.9654	DOR:NOR	C18:pos	NA	C6 H10 N2 O2	142.075	0.714	NA	NA	NA	NA	NA	0	NA	NA	NA	other
0.714_84.0212	0.8012	0.3891	0.4767	DOR:NOR	C18:pos	Lu3453000	C4 H4 O2	84.0212	0.714	NA	S9917	HMDB0032330	-1e-04	-1.3513	2	Organoheterocyclic compounds	Dihydrofurans	Furanones	other
0.716_144.0424	1.1747	0.6775	0.7286	DOR:NOR	C18:pos	Dimethyl maleate	C6 H8 O4	144.042	0.716	NA	S4436352	HMDB0031257	-1e-04	-0.7418	8	Lipids and lipid-like molecules	Fatty Acyls	Fatty acid esters	other
0.716_282.1608	1.4502	0.3948	0.4811	DOR:NOR	C18:pos	Miltirone	C19 H22 O2	282.161	0.716	NA	S140765	HMDB0035080	0.0012	4.3444	14	Lipids and lipid-like molecules	Prenol lipids	Diterpenoids	other
0.718_100.0525	0.7799	0.4632	0.5398	DOR:NOR	C18:pos	Glutaral	C5 H8 O2	100.052	0.718	NA	S3365	HMDB0029599	-1e-04	-0.9352	18	Organic oxygen compounds	Organooxygen compounds	Carbonyl compounds	other
0.718_143.0948	0.3912	0.5503	0.6182	DOR:NOR	C18:pos	Dl-stachydrine	C7 H13 N O2	143.095	0.718	NA	M837	NA	-2e-04	-1.1928	3	NA	NA	NA	other
0.718_293.1404	876.414	0.1225	0.3482	DOR:NOR	C18:pos	1221655	C19 H19 N O2	293.14	0.718	NA	S87989	HMDB0030210	0.0012	4.0017	2	Organoheterocyclic compounds	Indoles and derivatives	Carbazoles	other
0.719_73.0893	1.6242	0.2308	0.4017	DOR:NOR	C18:pos	Diethylamine	C4 H11 N	73.0893	0.719	NA	S7730	HMDB0041878	-1e-04	-1.7692	5	Organonitrogen compounds	Amines	Secondary amines	other
0.72_204.0746	4.1416	0.4529	0.5307	DOR:NOR	C18:pos	Glu-gly	C7 H12 N2 O5	204.075	0.72	NA	S4932470	HMDB0028819	0	-0.086	6	Organic acids and derivatives	Carboxylic acids and derivatives	Amino acids, peptides, and analogues	other
0.72_84.0688	570.507	0.2236	0.4006	DOR:NOR	C18:pos	Al9450000	C4 H8 N2	84.0688	0.72	NA	S21171402	HMDB0061875	-1e-04	-1.1162	1	Organic nitrogen compounds	Organonitrogen compounds	Amines	other
0.721_155.0959	3.571	0.2421	0.4057	DOR:NOR	C18:pos	NA	NA	155.096	0.721	NA	NA	NA	NA	NA	0	NA	NA	NA	other
0.721_203.1159	0.0522	0.0193	0.1359	DOR:NOR	C18:pos	O-acetylcarnitine	C9 H17 N O4	203.116	0.721	C02571	BGI603	NA	-1e-04	-0.6309	3	null	null	null	down
0.721_254.1297	1.2215	0.4458	0.5231	DOR:NOR	C18:pos	(e)-isoeugenyl benzyl ether	C17 H18 O2	254.13	0.721	NA	S668142	HMDB0032349	9e-04	3.7374	2	Benzenoids	Benzene and substituted derivatives	Phenylpropenes	other
0.722_193.0411	0.0731	0.0325	0.1757	DOR:NOR	C18:pos	NA	C6 H11 N O4 S	193.041	0.722	NA	NA	NA	NA	NA	0	NA	NA	NA	down
0.722_203.0795	0.1127	0.002	0.0434	DOR:NOR	C18:pos	2-acetamidohexanedioic acid	C8 H13 N O5	203.079	0.722	NA	S10382613	HMDB0062715	-1e-04	-0.609	1	Organic acids and derivatives	Carboxylic acids and derivatives	Amino acids, peptides, and analogues	down
0.722_309.1065	0.0943	0.0286	0.1666	DOR:NOR	C18:pos	N-acetylneuraminic acid	C11 H19 N O9	309.106	0.722	NA	S392810	HMDB0000230	-5e-04	-1.631	2	Organic oxygen compounds	Organooxygen compounds	Carbohydrates and carbohydrate conjugates	down
0.722_324.0354	0.0451	0.0499	0.2184	DOR:NOR	C18:pos	Uridine 5'-monophosphate	C9 H13 N2 O9 P	324.035	0.722	C00105	BGI562	NA	5e-04	1.5121	4	Nucleosides, nucleotides, and analogues	Pyrimidine nucleotides	Pyrimidine ribonucleotides	down
0.722_92.0045	1.5892	0.2643	0.4166	DOR:NOR	C18:pos	NA	C H4 N2 O S	92.0045	0.722	NA	NA	NA	NA	NA	0	NA	NA	NA	other
0.723_172.1212	267.304	0.2513	0.4078	DOR:NOR	C18:pos	NA	C8 H16 N2 O2	172.121	0.723	NA	NA	NA	NA	NA	0	NA	NA	NA	other
0.723_292.0901	3.7001	0.139	0.3689	DOR:NOR	C18:pos	Ethylenediaminetetraacetic acid	C10 H16 N2 O8	292.09	0.723	NA	S5826	HMDB0015109	6e-04	1.9871	1	Organic acids and derivatives	Carboxylic acids and derivatives	Tetracarboxylic acids and derivatives	other
0.724_101.1206	4.4517	0.0082	0.0859	DOR:NOR	C18:pos	Triethylamine	C6 H15 N	101.121	0.724	NA	S8158	HMDB0032539	-1e-04	-1.2453	2	Organonitrogen compounds	Amines	Tertiary amines	up
0.724_154.1106	722.445	0.2071	0.4006	DOR:NOR	C18:pos	NA	C8 H14 N2 O	154.111	0.724	NA	NA	NA	NA	NA	0	NA	NA	NA	other
0.724_185.993	0.0446	0.014	0.1132	DOR:NOR	C18:pos	3-phosphoglyceric acid	C3 H7 O7 P	185.993	0.724	NA	S704	HMDB0000807	-1e-04	-0.503	4	Organic oxygen compounds	Organooxygen compounds	Carbohydrates and carbohydrate conjugates	down
0.724_186.1368	85.4994	0.1812	0.3915	DOR:NOR	C18:pos	3-[(3-methylbutyl)(nitroso)amino]-2-butanone	C9 H18 N2 O2	186.137	0.724	NA	S46418	HMDB0033553	0	0.0235	1	Organooxygen compounds	Carbonyl compounds	Ketones	other
0.724_188.1162	0.1649	0.0716	0.2589	DOR:NOR	C18:pos	N6-acetyl-l-lysine	C8 H16 N2 O3	188.116	0.724	C02727	M501	NA	-1e-04	-0.7468	9	Organic acids and derivatives	Carboxylic acids and derivatives	Amino acids, peptides, and analogues	other
0.724_191.1522	12.0809	0.2033	0.3996	DOR:NOR	C18:pos	NA	C9 H21 N O3	191.152	0.724	NA	NA	NA	NA	NA	0	NA	NA	NA	other
0.724_193.1314	20.6622	0.1451	0.3756	DOR:NOR	C18:pos	NA	C8 H19 N O4	193.131	0.724	NA	NA	NA	NA	NA	0	NA	NA	NA	other
0.724_200.1525	25.1071	0.2432	0.4066	DOR:NOR	C18:pos	Hmba	C10 H20 N2 O2	200.153	0.724	NA	S3490	HMDB0041901	0	-0.0474	2	Organic acids and derivatives	Carboximidic acids and derivatives	Carboximidic acids	other
0.724_326.1504	0.1274	0.0132	0.1103	DOR:NOR	C18:pos	(4e)-1-(4-hydroxy-3-methoxyphenyl)-7-(4-hydroxyphenyl)-4-hepten-3-one	C20 H22 O4	326.15	0.724	NA	S4476437	HMDB0034720	0.0014	4.1954	12	Phenylpropanoids and polyketides	Diarylheptanoids	Linear diarylheptanoids	down
0.724_363.0574	0.155	0.1189	0.3439	DOR:NOR	C18:pos	Guanosine monophosphate	C10 H14 N5 O8 P	363.057	0.724	C00144	S6545	HMDB0001397	6e-04	1.5698	4	Nucleosides, nucleotides, and analogues	Purine nucleotides	Purine ribonucleotides	other
0.724_612.1504	0.0105	0.0013	0.0356	DOR:NOR	C18:pos	L-glutathione oxidized	C20 H32 N6 O12 S2	612.15	0.724	C00127	M471	NA	0.0016	2.5435	1	null	null	null	down
0.725_111.1048	392.593	0.1783	0.3915	DOR:NOR	C18:pos	NA	C7 H13 N	111.105	0.725	NA	NA	NA	NA	NA	0	NA	NA	NA	other
0.725_214.1681	32.3809	0.1767	0.3915	DOR:NOR	C18:pos	NA	C11 H22 N2 O2	214.168	0.725	NA	NA	NA	NA	NA	0	NA	NA	NA	other
0.725_226.1679	217.319	0.1755	0.3915	DOR:NOR	C18:pos	NA	C12 H22 N2 O2	226.168	0.725	NA	NA	NA	NA	NA	0	NA	NA	NA	other
0.726_186.1006	0.2997	0.121	0.3468	DOR:NOR	C18:pos	Ala-pro	C8 H14 N2 O3	186.101	0.726	NA	S370068	HMDB0028695	-2e-04	-0.9095	2	Organic acids and derivatives	Carboxylic acids and derivatives	Amino acids, peptides, and analogues	other
0.726_236.1522	40.0251	0.1811	0.3915	DOR:NOR	C18:pos	Procaine	C13 H20 N2 O2	236.152	0.726	NA	S4745	HMDB0014859	2e-04	1.0258	1	Benzenoids	Benzene and substituted derivatives	Benzoic acids and derivatives	other
0.726_347.0624	0.0927	0.105	0.326	DOR:NOR	C18:pos	Deoxyguanosine monophosphate	C10 H14 N5 O7 P	347.062	0.726	C00362	BGI218	NA	7e-04	1.9856	6	Nucleosides, nucleotides, and analogues	Purine nucleotides	Purine deoxyribonucleotides	other
0.727_112.1	518.254	0.1794	0.3915	DOR:NOR	C18:pos	NA	C6 H12 N2	112.1	0.727	NA	NA	NA	NA	NA	0	NA	NA	NA	other
0.727_138.043	3.6175	0.0534	0.2242	DOR:NOR	C18:pos	Urocanate	C6 H6 N2 O2	138.043	0.727	C00785	BGI565	NA	-1e-04	-0.4498	6	Organoheterocyclic compounds	Azoles	Imidazoles	other
0.727_148.0373	0.0564	0.0125	0.1075	DOR:NOR	C18:pos	(+/-)-2-hydroxyglutaric acid	C5 H8 O5	148.037	0.727	C02630	S42	HMDB0059655	-1e-04	-0.7038	8	Organic acids and derivatives	Hydroxy acids and derivatives	Short-chain hydroxy acids and derivatives	down
0.727_155.0946	20.6891	0.2058	0.4002	DOR:NOR	C18:pos	Arecoline	C8 H13 N O2	155.095	0.727	NA	S13872064	HMDB0030353	0	0.0822	1	Alkaloids and derivatives	null	null	other
0.727_212.1161	0.4863	0.2069	0.4006	DOR:NOR	C18:pos	Butabarbital	C10 H16 N2 O3	212.116	0.727	NA	S2385	HMDB0014382	0	0.0922	3	Organoheterocyclic compounds	Diazines	Pyrimidines and pyrimidine derivatives	other
0.727_316.1377	0.0639	0.036	0.1851	DOR:NOR	C18:pos	NA	C12 H20 N4 O6	316.138	0.727	NA	NA	NA	NA	NA	0	NA	NA	NA	down
0.728_296.0858	245.594	0.3649	0.4602	DOR:NOR	C18:pos	NA	C10 H20 N2 O4 S2	296.086	0.728	NA	NA	NA	NA	NA	0	NA	NA	NA	other
0.729_106.0201	2.5855	0.3988	0.4841	DOR:NOR	C18:pos	NA	C2 H6 N2 O S	106.02	0.729	NA	NA	NA	NA	NA	0	NA	NA	NA	other
0.729_283.1891	97.9677	0.1809	0.3915	DOR:NOR	C18:pos	NA	C14 H25 N3 O3	283.189	0.729	NA	NA	NA	NA	NA	0	NA	NA	NA	other
0.729_297.2045	45.4365	0.1729	0.3915	DOR:NOR	C18:pos	NA	C15 H27 N3 O3	297.204	0.729	NA	NA	NA	NA	NA	0	NA	NA	NA	other
0.73_281.0756	5.415	0.9276	0.9384	DOR:NOR	C18:pos	NA	C10 H19 N O4 S2	281.076	0.73	NA	NA	NA	NA	NA	0	NA	NA	NA	other
0.731_239.1632	18.628	0.1837	0.3915	DOR:NOR	C18:pos	NA	C12 H21 N3 O2	239.163	0.731	NA	NA	NA	NA	NA	0	NA	NA	NA	other
0.731_283.0912	0.1755	0.0957	0.3123	DOR:NOR	C18:pos	8-hydroxy-deoxyguanosine	C10 H13 N5 O5	283.091	0.731	NA	S66049	HMDB0003333	5e-04	1.8142	2	Nucleosides, nucleotides, and analogues	Purine nucleosides	Purine 2'-deoxyribonucleosides	other
0.731_289.1269	0.0322	0.0022	0.0455	DOR:NOR	C18:pos	Ophthalmic acid	C11 H19 N3 O6	289.127	0.731	C21016	BGI450	NA	5e-04	1.6464	1	Organic acids and derivatives	Carboxylic acids and derivatives	Amino acids, peptides, and analogues	down
0.731_311.2201	86.3246	0.1724	0.3915	DOR:NOR	C18:pos	NA	C16 H29 N3 O3	311.22	0.731	NA	NA	NA	NA	NA	0	NA	NA	NA	other
0.731_327.215	122.489	0.1752	0.3915	DOR:NOR	C18:pos	NA	C16 H29 N3 O4	327.215	0.731	NA	NA	NA	NA	NA	0	NA	NA	NA	other
0.732_167.9825	0.0739	0.0064	0.0799	DOR:NOR	C18:pos	Phosphoenolpyruvic acid	C3 H5 O6 P	167.982	0.732	C00074	S980	HMDB0000263	-1e-04	-0.7916	1	Organic acids and derivatives	Organic phosphoric acids and derivatives	Phosphate esters	down
0.732_325.2356	28.3476	0.1804	0.3915	DOR:NOR	C18:pos	NA	C17 H31 N3 O3	325.236	0.732	NA	NA	NA	NA	NA	0	NA	NA	NA	other
0.732_341.2306	60.8598	0.1755	0.3915	DOR:NOR	C18:pos	NA	C17 H31 N3 O4	341.231	0.732	NA	NA	NA	NA	NA	0	NA	NA	NA	other
0.732_73.9924	39.5288	0.165	0.3874	DOR:NOR	C18:pos	NA	C3 H3 Cl	73.9924	0.732	NA	NA	NA	NA	NA	0	NA	NA	NA	other
0.734_355.2463	37.7585	0.1779	0.3915	DOR:NOR	C18:pos	NA	C18 H33 N3 O4	355.246	0.734	NA	NA	NA	NA	NA	0	NA	NA	NA	other
0.735_394.257	39.8395	0.1841	0.3915	DOR:NOR	C18:pos	NA	C20 H34 N4 O4	394.257	0.735	NA	NA	NA	NA	NA	0	NA	NA	NA	other
0.737_188.0799	0.2775	0.1618	0.3863	DOR:NOR	C18:pos	N-acetylglutamine	C7 H12 N2 O4	188.08	0.737	NA	S23836	HMDB0006029	-2e-04	-0.8072	2	Organic acids and derivatives	Carboxylic acids and derivatives	Amino acids, peptides, and analogues	other
0.738_452.2993	20.5325	0.1802	0.3915	DOR:NOR	C18:pos	NA	C23 H40 N4 O5	452.299	0.738	NA	NA	NA	NA	NA	0	NA	NA	NA	other
0.739_253.1172	0.0255	0.0022	0.0457	DOR:NOR	C18:pos	Penciclovir	C10 H15 N5 O3	253.117	0.739	NA	S4563	HMDB0014444	3e-04	1.3022	1	Organoheterocyclic compounds	Imidazopyrimidines	Purines and purine derivatives	down
0.739_408.2729	22.5521	0.1882	0.3926	DOR:NOR	C18:pos	(2z)-n-(3-aminopropyl)-n-{4-[(3-aminopropyl)amino]butyl}-3-(4-hydroxy-3,5-dimethoxyphenyl)acrylamide	C21 H36 N4 O4	408.273	0.739	NA	S30777010	HMDB0033479	7e-04	1.7518	1	Phenylpropanoids and polyketides	Cinnamic acids and derivatives	Hydroxycinnamic acids and derivatives	other
0.741_112.0273	0.2207	0.0209	0.1421	DOR:NOR	C18:pos	Uracil	C4 H4 N2 O2	112.027	0.741	C00106	M2531	NA	-1e-04	-0.4538	2	Organoheterocyclic compounds	Diazines	Pyrimidines and pyrimidine derivatives	down
0.741_268.0804	0.0176	0.0018	0.0407	DOR:NOR	C18:pos	4687	C10 H12 N4 O5	268.08	0.741	C00294	S5799	HMDB0000195	4e-04	1.6115	5	Nucleosides, nucleotides, and analogues	Purine nucleosides	null	down
0.741_71.0737	0.197	0.0395	0.1909	DOR:NOR	C18:pos	Pyrrolidine	C4 H9 N	71.0737	0.741	NA	S29008	HMDB0031641	-2e-04	-3.0726	1	Organoheterocyclic compounds	Pyrrolidines	null	down
0.742_309.1682	0.0489	0.0196	0.1371	DOR:NOR	C18:pos	Lys-tyr	C15 H23 N3 O4	309.168	0.742	NA	S16568346	HMDB0028963	7e-04	2.2478	2	Organic acids and derivatives	Carboxylic acids and derivatives	Amino acids, peptides, and analogues	down
0.743_152.0335	0.1017	0.0539	0.2247	DOR:NOR	C18:pos	Xanthine	C5 H4 N4 O2	152.034	0.743	C00385	S1151	HMDB0000292	-1e-04	-0.4531	3	Organoheterocyclic compounds	Imidazopyrimidines	Purines and purine derivatives	other
0.743_422.2886	35.291	0.1802	0.3915	DOR:NOR	C18:pos	NA	C22 H38 N4 O4	422.289	0.743	NA	NA	NA	NA	NA	0	NA	NA	NA	other
0.744_217.1313	0.066	0.0111	0.1005	DOR:NOR	C18:pos	Propionylcarnitine	C10 H19 N O4	217.131	0.744	NA	S96904	HMDB0000824	1e-04	0.4348	2	Lipids and lipid-like molecules	Fatty Acyls	Fatty acid esters	down
0.745_317.1118	0.0329	0.0005	0.0239	DOR:NOR	C18:pos	NA	C13 H19 N O8	317.112	0.745	NA	NA	NA	NA	NA	0	NA	NA	NA	down
0.747_207.0566	0.0981	0.1675	0.3887	DOR:NOR	C18:pos	2-acrylamido-2-methyl-1-propane sulfonic acid	C7 H13 N O4 S	207.057	0.747	NA	S58836	HMDB0031200	0	-0.1342	2	Organic acids and derivatives	Sulfonic acids and derivatives	Sulfonic acids	other
0.747_319.1259	16.3378	0.315	0.4412	DOR:NOR	C18:pos	NA	C13 H21 N O8	319.126	0.747	NA	NA	NA	NA	NA	0	NA	NA	NA	other
0.747_438.2834	45.2076	0.1743	0.3915	DOR:NOR	C18:pos	NA	C22 H38 N4 O5	438.283	0.747	NA	NA	NA	NA	NA	0	NA	NA	NA	other
0.747_78.014	16.7169	0.1136	0.3394	DOR:NOR	C18:pos	Dimethyl sulfoxide	C2 H6 O S	78.014	0.747	C11143	S659	HMDB0002151	-1e-04	-1.181	1	Organosulfur compounds	Sulfoxides	null	other
0.748_203.0559	0.258	0.0987	0.3175	DOR:NOR	C18:pos	NA	NA	203.056	0.748	NA	NA	NA	NA	NA	0	NA	NA	NA	other
0.749_118.042	0.1698	0.0566	0.2329	DOR:NOR	C18:pos	Coumarone	C8 H6 O	118.042	0.749	C14512	S8868	HMDB0032929	-2e-04	-1.4653	4	Organoheterocyclic compounds	Benzofurans	null	other
0.75_122.0368	0.2371	0.0037	0.0609	DOR:NOR	C18:pos	Benzoic acid	C7 H6 O2	122.037	0.75	NA	S238	HMDB0001870	0	-0.0759	4	Benzenoids	Benzene and substituted derivatives	Benzoic acids and derivatives	down
0.75_376.2468	24.2643	0.1772	0.3915	DOR:NOR	C18:pos	NA	C19 H36 O7	376.247	0.75	NA	NA	NA	NA	NA	0	NA	NA	NA	other
0.753_115.9877	0.8815	0.6981	0.7463	DOR:NOR	C18:pos	NA	NA	115.988	0.753	NA	NA	NA	NA	NA	0	NA	NA	NA	other
0.753_289.1156	149.949	0.3766	0.4701	DOR:NOR	C18:pos	NA	C12 H19 N O7	289.116	0.753	NA	NA	NA	NA	NA	0	NA	NA	NA	other
0.756_305.1103	41.7931	0.3911	0.4774	DOR:NOR	C18:pos	NA	C12 H19 N O8	305.11	0.756	NA	NA	NA	NA	NA	0	NA	NA	NA	other
0.758_135.0685	0.2023	0.0452	0.2059	DOR:NOR	C18:pos	Acetanilide	C8 H9 N O	135.069	0.758	NA	S880	HMDB0001250	-1e-04	-0.9572	11	Benzenoids	Benzene and substituted derivatives	null	down
0.758_147.0355	0.1083	0.1179	0.3431	DOR:NOR	C18:pos	3-thiomorpholinecarboxylic acid	C5 H9 N O2 S	147.036	0.758	NA	S389150	HMDB0059611	-1e-04	-0.8684	1	Organic acids and derivatives	Carboxylic acids and derivatives	Amino acids, peptides, and analogues	other
0.758_234.085	8.0182	0.0813	0.2793	DOR:NOR	C18:pos	Glu-ser	C8 H14 N2 O6	234.085	0.758	NA	S5363587	HMDB0028828	2e-04	0.6449	5	Organic acids and derivatives	Carboxylic acids and derivatives	Amino acids, peptides, and analogues	other
0.762_175.0481	0.0502	0.0113	0.1009	DOR:NOR	C18:pos	N-acetyl-l-aspartic acid	C6 H9 N O5	175.048	0.762	C01042	S58576	HMDB0000812	0	-0.2274	6	Organic acids and derivatives	Carboxylic acids and derivatives	Amino acids, peptides, and analogues	down
0.762_321.0689	0.0183	0.0062	0.0787	DOR:NOR	C18:pos	N-[3-carboxy-2-(carboxymethyl)-2-hydroxypropanoyl]glutamic acid	C11 H15 N O10	321.069	0.762	NA	S19992713	HMDB0013220	7e-04	2.2343	1	Organic acids and derivatives	Carboxylic acids and derivatives	Amino acids, peptides, and analogues	down
0.763_366.1266	0.016	0.0273	0.1633	DOR:NOR	C18:pos	NA	C13 H22 N2 O10	366.127	0.763	NA	NA	NA	NA	NA	0	NA	NA	NA	down
0.769_165.0461	0.1391	0.1162	0.3424	DOR:NOR	C18:pos	Methionine sulfoxide	C5 H11 N O3 S	165.046	0.769	null	M487	HMDB0002005	-1e-04	-0.5615	2	Organic acids and derivatives	Carboxylic acids and derivatives	Amino acids, peptides, and analogues	other
0.77_304.09	0.0187	0.0014	0.0364	DOR:NOR	C18:pos	Spaglumic acid	C11 H16 N2 O8	304.09	0.77	NA	S5065	HMDB0001067	7e-04	2.3088	1	Organic acids and derivatives	Carboxylic acids and derivatives	Amino acids, peptides, and analogues	down
0.771_130.9226	1.6823	0.0637	0.246	DOR:NOR	C18:pos	NA	NA	130.923	0.771	NA	NA	NA	NA	NA	0	NA	NA	NA	other
0.771_181.0964	0.0775	0.0068	0.0815	DOR:NOR	C18:pos	6-methyltetrahydropterin	C7 H11 N5 O	181.096	0.771	NA	S3012	HMDB0002249	0	-0.0957	1	Organoheterocyclic compounds	Pteridines and derivatives	Pterins and derivatives	down
0.773_103.0456	0.1047	0.0675	0.2509	DOR:NOR	C18:pos	2-methylthiazolidine	C4 H9 N S	103.046	0.773	NA	S29856	HMDB0031682	-1e-04	-0.5395	1	Organoheterocyclic compounds	Azolidines	Thiazolidines	other
0.773_349.1477	0.0236	0.0256	0.1586	DOR:NOR	C18:pos	NA	C13 H23 N3 O8	349.148	0.773	NA	NA	NA	NA	NA	0	NA	NA	NA	down
0.774_132.0247	0.1001	0.0829	0.2827	DOR:NOR	C18:pos	3-methylsulfolene	C5 H8 O2 S	132.025	0.774	NA	S64103	HMDB0059667	-1e-04	-1.0884	1	Organoheterocyclic compounds	Dihydrothiophenes	null	other
0.823_321.069	0.0176	0.0005	0.0239	DOR:NOR	C18:pos	N-[3-carboxy-2-(carboxymethyl)-2-hydroxypropanoyl]glutamic acid	C11 H15 N O10	321.069	0.823	NA	S19992713	HMDB0013220	7e-04	2.0392	1	Organic acids and derivatives	Carboxylic acids and derivatives	Amino acids, peptides, and analogues	down
0.826_214.9408	1.0979	0.9145	0.928	DOR:NOR	C18:pos	NA	C H2 N3 O6 P S	214.941	0.826	NA	NA	NA	NA	NA	0	NA	NA	NA	other
0.832_200.9252	0.8946	0.9587	0.9641	DOR:NOR	C18:pos	NA	NA	200.925	0.832	NA	NA	NA	NA	NA	0	NA	NA	NA	other
0.833_223.941	1.3019	0.8117	0.8404	DOR:NOR	C18:pos	NA	C2 H3 N4 O3 P3	223.941	0.833	NA	NA	NA	NA	NA	0	NA	NA	NA	other
0.833_241.942	15.7432	0.469	0.5451	DOR:NOR	C18:pos	NA	C2 H4 N4 O4 P2 S	241.942	0.833	NA	NA	NA	NA	NA	0	NA	NA	NA	other
0.835_97.9771	1.947	0.0576	0.2347	DOR:NOR	C18:pos	Phosphoric acid	H3 O4 P	97.9771	0.835	C00009	S979	HMDB0000973	-2e-04	-2.2008	1	Homogeneous non-metal compounds	Non-metal oxoanionic compounds	Non-metal phosphates	other
0.837_192.9229	1.1241	0.9348	0.9443	DOR:NOR	C18:pos	NA	NA	192.923	0.837	NA	NA	NA	NA	NA	0	NA	NA	NA	other
0.838_607.0819	0.0237	0.0059	0.076	DOR:NOR	C18:pos	Udp-n-acetylglucosamine	C17 H27 N3 O17 P2	607.082	0.838	C00043	M2920	NA	-3e-04	-0.5374	3	Nucleosides, nucleotides, and analogues	Pyrimidine nucleotides	Pyrimidine nucleotide sugars	down
0.839_284.9094	0.0615	0.0272	0.1633	DOR:NOR	C18:pos	NA	C5 H5 N O5 P2 S2	284.909	0.839	NA	NA	NA	NA	NA	0	NA	NA	NA	down
0.845_185.9931	0.0468	0.0675	0.2509	DOR:NOR	C18:pos	3-phosphoglyceric acid	C3 H7 O7 P	185.993	0.845	NA	S704	HMDB0000807	-2e-04	-1.0913	4	Organic oxygen compounds	Organooxygen compounds	Carbohydrates and carbohydrate conjugates	other
0.85_156.0036	5.752	0.8157	0.8434	DOR:NOR	C18:pos	NA	NA	156.004	0.85	NA	NA	NA	NA	NA	0	NA	NA	NA	other
0.851_151.0495	0.3086	0.2449	0.4068	DOR:NOR	C18:pos	Guanine	C5 H5 N5 O	151.049	0.851	C00242	S744	HMDB0000132	-1e-04	-0.6178	3	Organoheterocyclic compounds	Imidazopyrimidines	Purines and purine derivatives	other
0.86_128.045	11.9924	0.1575	0.3863	DOR:NOR	C18:pos	NA	C2 H4 N6 O	128.045	0.86	NA	NA	NA	NA	NA	0	NA	NA	NA	other
0.869_229.0811	0.0324	0.0645	0.2472	DOR:NOR	C18:pos	NA	C9 H16 N3 P S	229.081	0.869	NA	NA	NA	NA	NA	0	NA	NA	NA	other
0.913_154.1106	74.8255	0.1399	0.3707	DOR:NOR	C18:pos	NA	C8 H14 N2 O	154.111	0.913	NA	NA	NA	NA	NA	0	NA	NA	NA	other
0.921_117.079	0.4929	0.0529	0.2228	DOR:NOR	C18:pos	L-(+)-valine	C5 H11 N O2	117.079	0.921	C00183	S6050	HMDB0000883	0	-0.3089	7	Organic acids and derivatives	Carboxylic acids and derivatives	Amino acids, peptides, and analogues	other
0.924_71.0737	0.2741	0.0577	0.2347	DOR:NOR	C18:pos	Pyrrolidine	C4 H9 N	71.0737	0.924	NA	S29008	HMDB0031641	-2e-04	-3.0937	1	Organoheterocyclic compounds	Pyrrolidines	null	other
0.979_123.0323	0.1247	0.0217	0.1439	DOR:NOR	C18:pos	Nicotinic acid	C6 H5 N O2	123.032	0.979	C00253	M519	NA	-3e-04	-2.3442	5	Organoheterocyclic compounds	Pyridines and derivatives	Pyridinecarboxylic acids and derivatives	down
0.988_149.0512	0.051	0.0386	0.1909	DOR:NOR	C18:pos	L-methionine	C5 H11 N O2 S	149.051	0.988	C00073	BGI369	NA	-1e-04	-0.8759	3	Organic acids and derivatives	Carboxylic acids and derivatives	Amino acids, peptides, and analogues	down
1.02_112.1	42.5136	0.1619	0.3863	DOR:NOR	C18:pos	NA	C6 H12 N2	112.1	1.02	NA	NA	NA	NA	NA	0	NA	NA	NA	other
1.024_206.9593	1.5166	0.6702	0.722	DOR:NOR	C18:pos	NA	C3 H3 N3 O4 P2	206.959	1.024	NA	NA	NA	NA	NA	0	NA	NA	NA	other
1.025_175.0481	0.035	0.0139	0.1131	DOR:NOR	C18:pos	N-acetyl-l-aspartic acid	C6 H9 N O5	175.048	1.025	C01042	BGI418	NA	0	-0.1957	6	Organic acids and derivatives	Carboxylic acids and derivatives	Amino acids, peptides, and analogues	down
1.025_71.0373	3.1995	0.0073	0.084	DOR:NOR	C18:pos	6185892	C3 H5 N O	71.0373	1.025	C01659	S6331	HMDB0004296	-2e-04	-2.818	1	Organic acids and derivatives	Carboximidic acids and derivatives	Carboximidic acids	up
1.03_189.9566	1.5377	0.6551	0.7075	DOR:NOR	C18:pos	NA	C5 H2 O6 S	189.957	1.03	NA	NA	NA	NA	NA	0	NA	NA	NA	other
1.031_112.0137	3.9515	0.2329	0.4035	DOR:NOR	C18:pos	NA	NA	112.014	1.031	NA	NA	NA	NA	NA	0	NA	NA	NA	other
1.031_122.0481	7.1607	0.1025	0.3226	DOR:NOR	C18:pos	Nicotinamide	C6 H6 N2 O	122.048	1.031	C00153	M517	NA	-1e-04	-0.7549	2	Organoheterocyclic compounds	Pyridines and derivatives	Pyridinecarboxylic acids and derivatives	other
1.034_160.9539	1.4548	0.585	0.6478	DOR:NOR	C18:pos	NA	C2 H N3 O2 P2	160.954	1.034	NA	NA	NA	NA	NA	0	NA	NA	NA	other
1.039_232.9748	1.8227	0.7918	0.8242	DOR:NOR	C18:pos	NA	NA	232.975	1.039	NA	NA	NA	NA	NA	0	NA	NA	NA	other
1.041_101.0478	1.3505	0.3575	0.4559	DOR:NOR	C18:pos	Acpc	C4 H7 N O2	101.048	1.041	C01234	S520	HMDB0036458	-1e-04	-1.0003	3	Organic acids and derivatives	Carboxylic acids and derivatives	Amino acids, peptides, and analogues	other
1.043_307.0832	0.0092	0.2249	0.4006	DOR:NOR	C18:pos	L-glutathione reduced	C10 H17 N3 O6 S	307.083	1.043	C00051	BGI358	NA	6e-04	1.9468	2	null	null	null	other
1.05_103.0456	0.075	0.0629	0.2447	DOR:NOR	C18:pos	2-methylthiazolidine	C4 H9 N S	103.046	1.05	NA	S29856	HMDB0031682	-1e-04	-0.5356	1	Organoheterocyclic compounds	Azolidines	Thiazolidines	other
1.05_132.0247	0.1109	0.0803	0.2771	DOR:NOR	C18:pos	3-methylsulfolene	C5 H8 O2 S	132.025	1.05	NA	S64103	HMDB0059667	-1e-04	-1.1227	1	Organoheterocyclic compounds	Dihydrothiophenes	null	other
1.064_136.0388	0.0357	0.0273	0.1633	DOR:NOR	C18:pos	Hypoxanthine	C5 H4 N4 O	136.039	1.064	C00262	M441	NA	-3e-04	-1.9167	2	Organoheterocyclic compounds	Imidazopyrimidines	Purines and purine derivatives	down
1.069_181.0964	0.0649	0.0595	0.237	DOR:NOR	C18:pos	6-methyltetrahydropterin	C7 H11 N5 O	181.096	1.069	NA	S3012	HMDB0002249	-1e-04	-0.2778	1	Organoheterocyclic compounds	Pteridines and derivatives	Pterins and derivatives	other
1.083_111.1048	31.2049	0.1707	0.3907	DOR:NOR	C18:pos	NA	C7 H13 N	111.105	1.083	NA	NA	NA	NA	NA	0	NA	NA	NA	other
1.134_72.0213	0.1532	0.2116	0.4006	DOR:NOR	C18:pos	Malondialdehyde	C3 H4 O2	72.0213	1.134	NA	S10499	HMDB0006112	-2e-04	-2.2469	3	Organic oxygen compounds	Organooxygen compounds	Carbonyl compounds	other
1.156_120.0324	6.3056	0.1333	0.3607	DOR:NOR	C18:pos	NA	C6 H4 N2 O	120.032	1.156	NA	NA	NA	NA	NA	0	NA	NA	NA	other
1.287_129.0427	4.038	0.2714	0.421	DOR:NOR	C18:pos	L-pyroglutamic acid	C5 H7 N O3	129.043	1.287	C01879	M1831	NA	-1e-04	-1.1219	7	Organic acids and derivatives	Carboxylic acids and derivatives	Amino acids, peptides, and analogues	other
1.343_135.0686	0.2476	0.0668	0.2509	DOR:NOR	C18:pos	N-benzylformamide	C8 H9 N O	135.069	1.343	C15561	M817	NA	-2e-04	-1.342	11	null	null	null	other
1.351_122.0368	0.4061	0.0076	0.0849	DOR:NOR	C18:pos	4-hydroxybenzaldehyde	C7 H6 O2	122.037	1.351	C00633	BGI119	NA	0	-0.0566	4	Organic oxygen compounds	Organooxygen compounds	Carbonyl compounds	down
1.358_164.0476	0.2073	0.0994	0.3179	DOR:NOR	C18:pos	2-hydroxycinnamic acid	C9 H8 O3	164.048	1.358	C01772	M168	NA	-2e-04	-1.3775	18	Phenylpropanoids and polyketides	Cinnamic acids and derivatives	Hydroxycinnamic acids and derivatives	other
1.358_181.0739	0.216	0.1056	0.3262	DOR:NOR	C18:pos	L-tyrosine	C9 H11 N O3	181.074	1.358	C01536	BGI384	NA	0	-0.2072	8	null	null	null	other
1.359_118.042	0.1984	0.0667	0.2509	DOR:NOR	C18:pos	Coumarone	C8 H6 O	118.042	1.359	C14512	S8868	HMDB0032929	-1e-04	-1.1404	4	Organoheterocyclic compounds	Benzofurans	null	other
1.422_296.0858	485.289	0.3908	0.4773	DOR:NOR	C18:pos	NA	C10 H20 N2 O4 S2	296.086	1.422	NA	NA	NA	NA	NA	0	NA	NA	NA	other
1.483_321.0689	0.0138	0.0009	0.0311	DOR:NOR	C18:pos	N-[3-carboxy-2-(carboxymethyl)-2-hydroxypropanoyl]glutamic acid	C11 H15 N O10	321.069	1.483	NA	S19992713	HMDB0013220	7e-04	2.1895	1	Organic acids and derivatives	Carboxylic acids and derivatives	Amino acids, peptides, and analogues	down
1.539_85.0529	104.927	0.1433	0.3734	DOR:NOR	C18:pos	2-pyrrolidone	C4 H7 N O	85.0529	1.539	NA	S11530	HMDB0002039	-1e-04	-0.9427	2	Organoheterocyclic compounds	Pyrrolidines	Pyrrolidones	other
1.6_134.1135	1.6132	0.0548	0.2276	DOR:NOR	C18:pos	NA	NA	134.113	1.6	NA	NA	NA	NA	NA	0	NA	NA	NA	other
1.64_85.0892	0.2171	0.0344	0.1811	DOR:NOR	C18:pos	2908	C5 H11 N	85.0892	1.64	C01746	S7791	HMDB0034301	-1e-04	-0.8227	1	Organoheterocyclic compounds	Piperidines	null	down
1.742_85.0529	123.868	0.1516	0.385	DOR:NOR	C18:pos	2-pyrrolidone	C4 H7 N O	85.0529	1.742	NA	S11530	HMDB0002039	-1e-04	-0.9671	2	Organoheterocyclic compounds	Pyrrolidines	Pyrrolidones	other
1.743_134.1135	1.9824	0.2712	0.421	DOR:NOR	C18:pos	NA	NA	134.113	1.743	NA	NA	NA	NA	NA	0	NA	NA	NA	other
1.759_131.0949	0.1564	0.0202	0.139	DOR:NOR	C18:pos	L-isoleucine	C6 H13 N O2	131.095	1.759	C00407	BGI366	NA	-3e-04	-2.1158	13	Organic acids and derivatives	Carboxylic acids and derivatives	Amino acids, peptides, and analogues	down
1.793_170.1054	10.2663	0.2923	0.4319	DOR:NOR	C18:pos	R-(+)-etiracetam	C8 H14 N2 O2	170.105	1.793	NA	S390096	HMDB0015333	1e-04	0.6185	2	Organic acids and derivatives	Carboxylic acids and derivatives	Amino acids, peptides, and analogues	other
1.799_85.0892	0.2138	0.0438	0.2016	DOR:NOR	C18:pos	2908	C5 H11 N	85.0892	1.799	C01746	S7791	HMDB0034301	-1e-04	-0.8204	1	Organoheterocyclic compounds	Piperidines	null	down
10.005_867.5206	0.0407	0.177	0.3915	DOR:NOR	C18:pos	NA	C40 H80 N5 O9 P3	867.521	10.005	NA	NA	NA	NA	NA	0	NA	NA	NA	other
10.008_851.5254	0.0201	0.1653	0.3874	DOR:NOR	C18:pos	NA	C36 H78 N5 O15 P	851.525	10.008	NA	NA	NA	NA	NA	0	NA	NA	NA	other
10.011_370.2163	0.1198	0.0431	0.1996	DOR:NOR	C18:pos	NA	C20 H34 O4 S	370.216	10.011	NA	NA	NA	NA	NA	0	NA	NA	NA	down
10.012_332.2711	0.034	0.0187	0.1339	DOR:NOR	C18:pos	Docosatetraenoic acid	C22 H36 O2	332.271	10.012	C16527	S4593749	HMDB0002226	4e-04	1.1868	6	Lipids and lipid-like molecules	Fatty Acyls	Fatty acids and conjugates	down
10.012_376.2349	0.0171	0.0279	0.1648	DOR:NOR	C18:pos	NA	C21 H32 N2 O4	376.235	10.012	NA	NA	NA	NA	NA	0	NA	NA	NA	down
10.012_379.2015	0.1275	0.0032	0.0558	DOR:NOR	C18:pos	NA	C20 H30 Cl N3 O2	379.202	10.012	NA	NA	NA	NA	NA	0	NA	NA	NA	down
10.012_386.1902	0.0932	0.0187	0.1339	DOR:NOR	C18:pos	NA	C17 H33 N4 P3	386.19	10.012	NA	NA	NA	NA	NA	0	NA	NA	NA	down
10.012_392.2088	0.073	0.0387	0.1909	DOR:NOR	C18:pos	Ivacaftor	C24 H28 N2 O3	392.209	10.012	NA	S17347474	HMDB0015705	0.0012	3.0677	2	Benzenoids	Benzene and substituted derivatives	Anilides	down
10.012_444.2223	0.0437	0.0131	0.1102	DOR:NOR	C18:pos	NA	C21 H39 N2 O2 P3	444.222	10.012	NA	NA	NA	NA	NA	0	NA	NA	NA	down
10.013_305.2407	0.0911	0.0004	0.0219	DOR:NOR	C18:pos	NA	C16 H37 N P2	305.241	10.013	NA	NA	NA	NA	NA	0	NA	NA	NA	down
10.013_338.2128	0.2203	0.0026	0.0472	DOR:NOR	C18:pos	NA	C18 H31 N2 O2 P	338.213	10.013	NA	NA	NA	NA	NA	0	NA	NA	NA	down
10.013_354.1852	0.1668	0.0007	0.0279	DOR:NOR	C18:pos	NA	C14 H32 N2 O4 P2	354.185	10.013	NA	NA	NA	NA	NA	0	NA	NA	NA	down
10.013_354.2529	0.0326	0.0198	0.1373	DOR:NOR	C18:pos	NA	C19 H34 N2 O4	354.253	10.013	NA	NA	NA	NA	NA	0	NA	NA	NA	down
10.014_264.2451	0.0508	0.0001	0.0106	DOR:NOR	C18:pos	2-[(5z)-5-tetradecen-1-yl]cyclobutanone	C18 H32 O	264.245	10.014	NA	S9000840	HMDB0037543	2e-04	0.8165	1	Organic oxygen compounds	Organooxygen compounds	Carbonyl compounds	down
10.014_282.2556	0.0681	0.0001	0.0106	DOR:NOR	C18:pos	Oleic acid	C18 H34 O2	282.256	10.014	C00712	S393217	HMDB0000207	3e-04	1.1567	9	Lipids and lipid-like molecules	Fatty Acyls	Fatty acids and conjugates	down
10.014_326.2195	0.08	0.0003	0.0218	DOR:NOR	C18:pos	NA	C17 H30 N2 O4	326.219	10.014	NA	NA	NA	NA	NA	0	NA	NA	NA	down
10.014_349.2974	0.0415	0.0228	0.147	DOR:NOR	C18:pos	N-homo-?-linolenoylethanolamine	C22 H39 N O2	349.297	10.014	NA	S4445443	HMDB0013625	7e-04	1.9601	1	Organic nitrogen compounds	Organonitrogen compounds	Amines	down
10.014_381.1972	0.12	0.0002	0.0164	DOR:NOR	C18:pos	NA	C23 H28 Cl N3	381.197	10.014	NA	NA	NA	NA	NA	0	NA	NA	NA	down
10.014_602.4582	0.0132	0.0001	0.0106	DOR:NOR	C18:pos	NA	C36 H63 N2 O3 P	602.458	10.014	NA	NA	NA	NA	NA	0	NA	NA	NA	down
10.014_853.5413	0.0273	0.1804	0.3915	DOR:NOR	C18:pos	NA	C36 H80 N5 O15 P	853.541	10.014	NA	NA	NA	NA	NA	0	NA	NA	NA	other
10.015_336.2509	0.2004	0.0004	0.0219	DOR:NOR	C18:pos	NA	C18 H32 N4 O2	336.251	10.015	NA	NA	NA	NA	NA	0	NA	NA	NA	down
10.015_338.1747	0.1272	0.0016	0.0381	DOR:NOR	C18:pos	NA	C18 H27 Cl N2 O2	338.175	10.015	NA	NA	NA	NA	NA	4	NA	NA	NA	down
10.015_352.2289	0.1357	0.0008	0.0285	DOR:NOR	C18:pos	NA	C17 H38 O3 P2	352.229	10.015	NA	NA	NA	NA	NA	0	NA	NA	NA	down
10.015_456.3214	0.0351	0.0224	0.1462	DOR:NOR	C18:pos	NA	C25 H40 N6 O2	456.321	10.015	NA	NA	NA	NA	NA	0	NA	NA	NA	down
10.015_608.4746	0.0382	0.004	0.0629	DOR:NOR	C18:pos	NA	C29 H65 N6 O5 P	608.475	10.015	NA	NA	NA	NA	NA	0	NA	NA	NA	down
10.015_618.4294	0.0172	0.0007	0.0279	DOR:NOR	C18:pos	5,5',6,6'-tetrahydro-3',6'-epoxy-beta,beta-carotene-3,5,5',6-tetrol	C40 H58 O5	618.429	10.015	NA	S35013075	HMDB0029654	-0.001	-1.5427	1	Lipids and lipid-like molecules	Prenol lipids	Tetraterpenoids	down
10.016_366.2071	0.4009	0.0134	0.1109	DOR:NOR	C18:pos	NA	C13 H32 N6 O2 P2	366.207	10.016	NA	NA	NA	NA	NA	0	NA	NA	NA	down
10.016_377.2012	0.2484	0.0042	0.0653	DOR:NOR	C18:pos	NA	C21 H31 N O3 S	377.201	10.016	NA	NA	NA	NA	NA	0	NA	NA	NA	down
10.016_394.2065	0.3007	0.0592	0.2367	DOR:NOR	C18:pos	NA	C17 H35 N2 O4 P S	394.207	10.016	NA	NA	NA	NA	NA	0	NA	NA	NA	other
10.017_336.1745	0.1626	0.0006	0.0279	DOR:NOR	C18:pos	6-isopropylidene-4,4a-dimethyl-7-oxodecahydro-2-naphthalenyl (2e)-3-(methylsulfanyl)acrylate	C19 H28 O3 S	336.175	10.017	NA	S35014024	HMDB0035802	0.0014	4.0581	1	Lipids and lipid-like molecules	Prenol lipids	Sesquiterpenoids	down
10.017_368.2008	0.1946	0.0018	0.0407	DOR:NOR	C18:pos	NA	C15 H34 N2 O4 P2	368.201	10.017	NA	NA	NA	NA	NA	0	NA	NA	NA	down
10.017_895.5515	0.0408	0.1661	0.3874	DOR:NOR	C18:pos	NA	C42 H84 N5 O9 P3	895.552	10.017	NA	NA	NA	NA	NA	0	NA	NA	NA	other
10.018_827.5269	0.0055	0.1776	0.3915	DOR:NOR	C18:pos	NA	C39 H78 N3 O13 P	827.527	10.018	NA	NA	NA	NA	NA	0	NA	NA	NA	other
10.022_811.5317	0.0111	0.0786	0.2741	DOR:NOR	C18:pos	NA	C43 H80 N3 O5 P3	811.532	10.022	NA	NA	NA	NA	NA	0	NA	NA	NA	other
10.023_309.3028	1.3757	0.3661	0.4609	DOR:NOR	C18:pos	1-hexadecanoylpyrrolidine	C20 H39 N O	309.303	10.023	NA	S216397	HMDB0032740	4e-04	1.2576	1	Organoheterocyclic compounds	Pyrrolidines	N-acylpyrrolidines	other
10.024_805.5451	0.009	0.1907	0.3947	DOR:NOR	C18:pos	NA	C46 H82 N O4 P3	805.545	10.024	NA	NA	NA	NA	NA	0	NA	NA	NA	other
10.025_371.2854	0.11	0.4167	0.4978	DOR:NOR	C18:pos	NA	C21 H41 N O2 S	371.285	10.025	NA	NA	NA	NA	NA	0	NA	NA	NA	other
10.027_364.2944	0.1062	0.0131	0.1102	DOR:NOR	C18:pos	NA	C19 H36 N6 O	364.294	10.027	NA	NA	NA	NA	NA	0	NA	NA	NA	down
10.03_338.2791	0.125	0.2634	0.4162	DOR:NOR	C18:pos	NA	C17 H34 N6 O	338.279	10.03	NA	NA	NA	NA	NA	0	NA	NA	NA	other
10.046_435.3342	1.6821	0.0998	0.3186	DOR:NOR	C18:pos	NA	C26 H45 N O4	435.334	10.046	NA	NA	NA	NA	NA	0	NA	NA	NA	other
10.051_770.5646	2.6146	0.1943	0.396	DOR:NOR	C18:pos	NA	C54 H74 O3	770.565	10.051	NA	NA	NA	NA	NA	0	NA	NA	NA	other
10.052_396.2636	1.6802	0.2762	0.4242	DOR:NOR	C18:pos	1-hexadecyl-sn-glycerol 3-phosphate	C19 H41 O6 P	396.264	10.052	NA	S10000084	HMDB0062325	5e-04	1.3187	1	Lipids and lipid-like molecules	Glycerophospholipids	Glycerophosphates	other
10.053_335.3183	1.0738	0.6053	0.6642	DOR:NOR	C18:pos	(2e,4z)-n-isobutyl-2,4-octadecadienamide	C22 H41 N O	335.318	10.053	NA	S30776913	HMDB0031678	5e-04	1.586	1	Lipids and lipid-like molecules	Fatty Acyls	Fatty amides	other
10.053_359.3113	1.2921	0.5837	0.6468	DOR:NOR	C18:pos	NA	NA	359.311	10.053	NA	NA	NA	NA	NA	0	NA	NA	NA	other
10.054_266.2607	1.1542	0.7176	0.7633	DOR:NOR	C18:pos	Mfcd00801046	C18 H34 O	266.261	10.054	NA	S492863	HMDB0037517	3e-04	0.9914	2	Organic oxygen compounds	Organooxygen compounds	Carbonyl compounds	other
10.054_340.2972	1.2105	0.6418	0.6969	DOR:NOR	C18:pos	Propyl (9e)-12-hydroxy-9-octadecenoate	C21 H40 O3	340.297	10.054	NA	S11338693	HMDB0032476	6e-04	1.7641	1	Lipids and lipid-like molecules	Fatty Acyls	Fatty alcohols	other
10.054_375.3345	1.2895	0.5482	0.6162	DOR:NOR	C18:pos	NA	C21 H45 N O4	375.334	10.054	NA	NA	NA	NA	NA	0	NA	NA	NA	other
10.054_380.2898	1.4169	0.4185	0.4985	DOR:NOR	C18:pos	NA	C19 H36 N6 O2	380.29	10.054	NA	NA	NA	NA	NA	0	NA	NA	NA	other
10.054_738.5971	1.1499	0.6549	0.7075	DOR:NOR	C18:pos	NA	C40 H78 N6 O6	738.597	10.054	NA	NA	NA	NA	NA	0	NA	NA	NA	other
10.055_442.2603	1.6474	0.3414	0.4487	DOR:NOR	C18:pos	NA	C22 H39 N2 O5 P	442.26	10.055	NA	NA	NA	NA	NA	0	NA	NA	NA	other
10.058_620.3018	23.0259	0.3361	0.4471	DOR:NOR	C18:pos	NA	C34 H44 N4 O5 S	620.302	10.058	NA	NA	NA	NA	NA	0	NA	NA	NA	other
10.069_831.5606	0.0257	0.1943	0.396	DOR:NOR	C18:pos	NA	C44 H82 N O11 P	831.561	10.069	NA	NA	NA	NA	NA	0	NA	NA	NA	other
10.081_810.6599	101.3	0.001	0.0325	DOR:NOR	C18:pos	NA	C41 H92 N6 O5 P2	810.66	10.081	NA	NA	NA	NA	NA	0	NA	NA	NA	up
10.085_392.2898	1.3426	0.6937	0.7423	DOR:NOR	C18:pos	NA	C19 H40 N2 O6	392.29	10.085	NA	NA	NA	NA	NA	0	NA	NA	NA	other
10.093_308.271	0.0323	0.0045	0.069	DOR:NOR	C18:pos	1-(3-hydroxy-3-methyl-4-penten-1-yl)-2,5,5,8a-tetramethyldecahydro-2-naphthalenol	C20 H36 O2	308.271	10.093	NA	S454751	HMDB0036827	5e-04	1.6098	4	Lipids and lipid-like molecules	Prenol lipids	Diterpenoids	down
10.093_330.2424	0.0441	0.0049	0.0702	DOR:NOR	C18:pos	NA	NA	330.242	10.093	NA	NA	NA	NA	NA	0	NA	NA	NA	down
10.093_352.2349	0.029	0.0022	0.0455	DOR:NOR	C18:pos	NA	C21 H37 P S	352.235	10.093	NA	NA	NA	NA	NA	0	NA	NA	NA	down
10.093_362.1903	0.0298	0.014	0.1132	DOR:NOR	C18:pos	NA	C16 H32 N2 O3 P2	362.19	10.093	NA	NA	NA	NA	NA	0	NA	NA	NA	down
10.093_384.3234	0.019	0.0001	0.0106	DOR:NOR	C18:pos	2-hydroxy-4-oxohenicosyl acetate	C23 H44 O4	384.323	10.093	NA	S9080371	HMDB0036344	5e-04	1.3562	3	Lipids and lipid-like molecules	Fatty Acyls	Fatty alcohols	down
10.094_346.2178	0.0276	0.0093	0.0903	DOR:NOR	C18:pos	NA	C20 H31 N2 O P	346.218	10.094	NA	NA	NA	NA	NA	0	NA	NA	NA	down
10.094_393.2086	0.0269	0.0007	0.0279	DOR:NOR	C18:pos	NA	C20 H31 N3 O3 S	393.209	10.094	NA	NA	NA	NA	NA	0	NA	NA	NA	down
10.094_420.2221	0.0398	0.0012	0.0352	DOR:NOR	C18:pos	NA	C17 H32 N4 O8	420.222	10.094	NA	NA	NA	NA	NA	0	NA	NA	NA	down
10.096_430.1771	0.0392	0.0024	0.0466	DOR:NOR	C18:pos	NA	C21 H35 O3 P S2	430.177	10.096	NA	NA	NA	NA	NA	0	NA	NA	NA	down
10.1_790.5528	0.0435	0.1676	0.3887	DOR:NOR	C18:pos	NA	C35 H79 N6 O11 P	790.553	10.1	NA	NA	NA	NA	NA	0	NA	NA	NA	other
10.1_809.5168	0.0218	0.1995	0.396	DOR:NOR	C18:pos	1-oleoyl-2-arachidonoyl-sn-glycero-3-phospho-l-serine	C44 H76 N O10 P	809.517	10.1	NA	S29368492	HMDB0012394	0.0039	4.7667	48	Lipids and lipid-like molecules	Glycerophospholipids	Glycerophosphoserines	other
10.102_335.3183	1.4367	0.326	0.4414	DOR:NOR	C18:pos	(2e,4z)-n-isobutyl-2,4-octadecadienamide	C22 H41 N O	335.318	10.102	NA	S30776913	HMDB0031678	5e-04	1.6298	1	Lipids and lipid-like molecules	Fatty Acyls	Fatty amides	other
10.108_380.2689	0.0662	0.0625	0.2443	DOR:NOR	C18:pos	NA	C21 H36 N2 O4	380.269	10.108	NA	NA	NA	NA	NA	0	NA	NA	NA	other
10.11_358.2867	0.074	0.049	0.2163	DOR:NOR	C18:pos	1-phenyl-1,3-octadecanedione	C24 H38 O2	358.287	10.11	NA	S78501	HMDB0035583	5e-04	1.3445	3	Organic oxygen compounds	Organooxygen compounds	Carbonyl compounds	down
10.111_375.3131	0.0675	0.0449	0.2051	DOR:NOR	C18:pos	Docosatetraenoylethanolamide	C24 H41 N O2	375.313	10.111	NA	S4445444	HMDB0013626	6e-04	1.5909	1	Organic nitrogen compounds	Organonitrogen compounds	Amines	down
10.112_412.206	0.1523	0.0307	0.1721	DOR:NOR	C18:pos	NA	C18 H38 Cl N2 O2 P S	412.206	10.112	NA	NA	NA	NA	NA	0	NA	NA	NA	down
10.119_787.5342	0.0192	0.1778	0.3915	DOR:NOR	C18:pos	1,2-dioleoyl-sn-glycero-3-phospho-l-serine	C42 H78 N O10 P	787.534	10.119	NA	S4943103	HMDB0012390	0.0022	2.7427	14	Lipids and lipid-like molecules	Glycerophospholipids	Glycerophosphoserines	other
10.127_666.5191	180.548	0	0.0083	DOR:NOR	C18:pos	1-oleoyl-2-(4z,7z,10z,13z,16z,19z-docosahexaenoyl)-sn-glycerol	C43 H70 O5	666.519	10.127	NA	S7822840	HMDB0007237	0.0032	4.8475	39	Lipids and lipid-like molecules	Glycerolipids	Diradylglycerols	up
10.152_373.3718	0.0189	0.211	0.4006	DOR:NOR	C18:pos	NA	C26 H47 N	373.372	10.152	NA	NA	NA	NA	NA	0	NA	NA	NA	other
10.159_813.5501	0.0345	0.1809	0.3915	DOR:NOR	C18:pos	1-stearoyl-2-(8z,11z,14z-icosatrienoyl)-sn-glycero-3-phosphoserine	C44 H80 N O10 P	813.55	10.159	NA	S34449015	HMDB0012382	0.0019	2.3853	16	Lipids and lipid-like molecules	Glycerophospholipids	Glycerophosphoserines	other
10.161_440.326	0.0447	0.1799	0.3915	DOR:NOR	C18:pos	NA	C26 H49 O P S	440.326	10.161	NA	NA	NA	NA	NA	0	NA	NA	NA	other
10.164_384.3387	0.0354	0.2304	0.4014	DOR:NOR	C18:pos	Cholecalciferol	C27 H44 O	384.339	10.164	C05443	M1276	NA	5e-04	1.3926	17	Lipids and lipid-like molecules	Steroids and steroid derivatives	Vitamin D and derivatives	other
10.165_422.3157	0.0251	0.0884	0.2969	DOR:NOR	C18:pos	NA	C23 H43 N4 O P	422.316	10.165	NA	NA	NA	NA	NA	0	NA	NA	NA	other
10.167_432.3209	0.0257	0.0017	0.0397	DOR:NOR	C18:pos	NA	C22 H44 N2 O6	432.321	10.167	NA	NA	NA	NA	NA	0	NA	NA	NA	down
10.168_323.3181	1.0014	0.8019	0.8325	DOR:NOR	C18:pos	1-(14-methylhexadecanoyl)pyrrolidine	C21 H41 N O	323.318	10.168	NA	S4935858	HMDB0034373	8e-04	2.3719	1	Organoheterocyclic compounds	Pyrrolidines	N-acylpyrrolidines	other
10.175_525.3064	0.0939	0.0065	0.0799	DOR:NOR	C18:pos	O-{hydroxy[2-hydroxy-3-(stearoyloxy)propoxy]phosphoryl}serine	C24 H48 N O9 P	525.306	10.175	NA	S74849606	HMDB0061698	2e-04	0.3749	1	Lipids and lipid-like molecules	Glycerophospholipids	Glycerophosphoserines	down
10.175_585.5326	16.3057	0.0082	0.0859	DOR:NOR	C18:pos	NA	C35 H71 N O5	585.533	10.175	NA	NA	NA	NA	NA	0	NA	NA	NA	up
10.18_334.2866	0.0246	0.0034	0.0587	DOR:NOR	C18:pos	(13z,16z,19z)-docosatrienoic acid	C22 H38 O2	334.287	10.18	NA	S4471982	HMDB0002823	6e-04	1.8104	2	Lipids and lipid-like molecules	Fatty Acyls	Fatty acids and conjugates	down
10.18_351.313	0.0266	0.0032	0.0558	DOR:NOR	C18:pos	NA	C22 H41 N O2	351.313	10.18	NA	NA	NA	NA	NA	0	NA	NA	NA	down
10.181_356.2685	0.0278	0.0077	0.085	DOR:NOR	C18:pos	NA	C21 H41 P S	356.269	10.181	NA	NA	NA	NA	NA	0	NA	NA	NA	down
10.181_378.2505	0.0296	0.0242	0.1537	DOR:NOR	C18:pos	NA	C23 H39 P S	378.25	10.181	NA	NA	NA	NA	NA	0	NA	NA	NA	down
10.181_388.2058	0.0409	0.0083	0.0859	DOR:NOR	C18:pos	NA	C19 H28 N6 O S	388.206	10.181	NA	NA	NA	NA	NA	0	NA	NA	NA	down
10.185_800.5433	0.419	0.3003	0.4372	DOR:NOR	C18:pos	NA	C44 H83 O6 P3	800.543	10.185	NA	NA	NA	NA	NA	0	NA	NA	NA	other
10.185_805.4983	0.4707	0.4582	0.5356	DOR:NOR	C18:pos	NA	C42 H74 N5 O4 P3	805.498	10.185	NA	NA	NA	NA	NA	0	NA	NA	NA	other
10.186_218.1672	0.6388	0.5008	0.5728	DOR:NOR	C18:pos	1-phenyl-1-nonanone	C15 H22 O	218.167	10.186	NA	S72358	HMDB0094674	-1e-04	-0.5001	34	Organic oxygen compounds	Organooxygen compounds	Carbonyl compounds	other
10.186_821.4725	0.639	0.9869	0.9873	DOR:NOR	C18:pos	NA	C43 H73 N3 O6 P2 S	821.472	10.186	NA	NA	NA	NA	NA	0	NA	NA	NA	other
10.19_406.2844	0.1131	0.1616	0.3863	DOR:NOR	C18:pos	NA	C22 H39 N4 O P	406.284	10.19	NA	NA	NA	NA	NA	0	NA	NA	NA	other
10.223_492.3422	0.8812	0.9743	0.976	DOR:NOR	C18:pos	NA	C23 H49 N4 O5 P	492.342	10.223	NA	NA	NA	NA	NA	0	NA	NA	NA	other
10.224_297.3025	0.6943	0.1114	0.3358	DOR:NOR	C18:pos	Tridemorph	C19 H39 N O	297.303	10.224	NA	S30142	HMDB0031810	7e-04	2.2607	1	Organoheterocyclic compounds	Oxazinanes	Morpholines	other
10.256_89.9695	1.619	0.1076	0.3297	DOR:NOR	C18:pos	NA	C2 H3 P S	89.9695	10.256	NA	NA	NA	NA	NA	0	NA	NA	NA	other
10.26_407.3774	0.039	0.2399	0.4048	DOR:NOR	C18:pos	NA	C26 H49 N O2	407.377	10.26	NA	NA	NA	NA	NA	0	NA	NA	NA	other
10.273_340.1905	1.3039	0.0838	0.2853	DOR:NOR	C18:pos	Pentamidine	C19 H24 N4 O2	340.19	10.273	NA	S4573	HMDB0014876	-6e-04	-1.6562	1	Benzenoids	Phenol ethers	null	other
10.273_356.2005	1.6473	0.0781	0.273	DOR:NOR	C18:pos	2-[(3z)-4,8-dimethyl-3,7-nonadien-1-yl]-8-hydroxy-3-methylene-6-chromanecarboxylic acid	C22 H28 O4	356.2	10.273	NA	S35014986	HMDB0040634	-0.0017	-4.8336	2	Lipids and lipid-like molecules	Prenol lipids	Monoterpenoids	other
10.273_377.3288	0.0622	0.0336	0.1791	DOR:NOR	C18:pos	NA	C24 H43 N O2	377.329	10.273	NA	NA	NA	NA	NA	0	NA	NA	NA	down
10.273_382.2842	0.0678	0.0593	0.2367	DOR:NOR	C18:pos	NA	C22 H34 N6	382.284	10.273	NA	NA	NA	NA	NA	0	NA	NA	NA	other
10.273_400.3336	0.0883	0.2124	0.4006	DOR:NOR	C18:pos	7a-hydroxy-cholestene-3-one	C27 H44 O2	400.334	10.273	C05455	S110306	HMDB0001993	5e-04	1.3487	13	Lipids and lipid-like molecules	Steroids and steroid derivatives	Cholestane steroids	other
10.273_401.2351	1.1043	0.4368	0.5152	DOR:NOR	C18:pos	NA	NA	401.235	10.273	NA	NA	NA	NA	NA	0	NA	NA	NA	other
10.273_404.2662	0.0317	0.0265	0.1605	DOR:NOR	C18:pos	NA	C17 H37 N6 O3 P	404.266	10.273	NA	NA	NA	NA	NA	0	NA	NA	NA	down
10.273_433.2611	1.4723	0.074	0.2642	DOR:NOR	C18:pos	NA	C22 H36 N5 O2 P	433.261	10.273	NA	NA	NA	NA	NA	0	NA	NA	NA	other
10.273_822.6486	0.0456	0.2234	0.4006	DOR:NOR	C18:pos	NA	C45 H87 N6 O5 P	822.649	10.273	NA	NA	NA	NA	NA	0	NA	NA	NA	other
10.274_360.3022	0.0714	0.0314	0.1721	DOR:NOR	C18:pos	(9z,12z,15z,18z)-tetracosatetraenoic acid	C24 H40 O2	360.302	10.274	NA	S30776538	HMDB0006246	6e-04	1.7405	3	Lipids and lipid-like molecules	Fatty Acyls	Fatty acids and conjugates	down
10.274_396.2221	1.5375	0.1177	0.3429	DOR:NOR	C18:pos	NA	C17 H37 N2 O4 P S	396.222	10.274	NA	NA	NA	NA	NA	0	NA	NA	NA	other
10.274_414.2212	0.2798	0.134	0.3616	DOR:NOR	C18:pos	NA	C25 H34 O3 S	414.221	10.274	NA	NA	NA	NA	NA	0	NA	NA	NA	other
10.28_692.5335	91.8071	0.0034	0.0584	DOR:NOR	C18:pos	NA	C41 H68 N6 O3	692.534	10.28	NA	NA	NA	NA	NA	0	NA	NA	NA	up
10.281_687.5778	31.7106	0.0103	0.0958	DOR:NOR	C18:pos	NA	C43 H77 N O5	687.578	10.281	NA	NA	NA	NA	NA	0	NA	NA	NA	up
10.281_795.537	0.0257	0.0628	0.2447	DOR:NOR	C18:pos	NA	C38 H79 N5 O8 P2	795.537	10.281	NA	NA	NA	NA	NA	0	NA	NA	NA	other
10.282_789.5495	0.0264	0.3258	0.4414	DOR:NOR	C18:pos	1-stearoyl-2-oleoyl-sn-glycero-3-phosphoserine	C42 H80 N O10 P	789.549	10.282	NA	S7826037	HMDB0010163	0.0025	3.1181	12	Lipids and lipid-like molecules	Glycerophospholipids	Glycerophosphoserines	other
10.291_632.477	60.1614	0.0002	0.0169	DOR:NOR	C18:pos	NA	C33 H70 N4 O P2 S	632.477	10.291	NA	NA	NA	NA	NA	0	NA	NA	NA	up
10.3_773.5539	0.0289	0.0696	0.2544	DOR:NOR	C18:pos	NA	C42 H80 N O9 P	773.554	10.3	NA	NA	NA	NA	NA	0	NA	NA	NA	other
10.304_283.2872	0.5569	0.3561	0.4556	DOR:NOR	C18:pos	Amide c18	C18 H37 N O	283.287	10.304	NA	S29032	HMDB0034146	3e-04	1.1244	1	Lipids and lipid-like molecules	Fatty Acyls	Fatty amides	other
10.308_450.3097	0.0811	0.0358	0.1851	DOR:NOR	C18:pos	NA	C26 H46 N2 S2	450.31	10.308	NA	NA	NA	NA	NA	0	NA	NA	NA	down
10.309_398.3179	0.0636	0.1363	0.3656	DOR:NOR	C18:pos	NA	C27 H42 O2	398.318	10.309	NA	NA	NA	NA	NA	0	NA	NA	NA	other
10.31_611.5473	234.754	0.0006	0.0279	DOR:NOR	C18:pos	NA	C37 H73 N O5	611.547	10.31	NA	NA	NA	NA	NA	0	NA	NA	NA	up
10.311_354.2509	0.0281	0.0001	0.0106	DOR:NOR	C18:pos	NA	C21 H39 P S	354.251	10.311	NA	NA	NA	NA	NA	0	NA	NA	NA	down
10.312_616.5028	205.697	0.0004	0.0219	DOR:NOR	C18:pos	NA	C34 H68 N2 O7	616.503	10.312	NA	NA	NA	NA	NA	0	NA	NA	NA	up
10.315_332.2712	0.1008	0.1329	0.3602	DOR:NOR	C18:pos	Docosatetraenoic acid	C22 H36 O2	332.271	10.315	C16527	S4593749	HMDB0002226	3e-04	1.0298	6	Lipids and lipid-like molecules	Fatty Acyls	Fatty acids and conjugates	other
10.315_348.2333	0.0443	0.0001	0.0106	DOR:NOR	C18:pos	NA	C20 H33 N2 O P	348.233	10.315	NA	NA	NA	NA	NA	0	NA	NA	NA	down
10.315_364.2056	0.0249	0.0002	0.0169	DOR:NOR	C18:pos	8,8-dimethyl-3-(2-methyl-3-buten-2-yl)-10-(3-methyl-2-buten-1-yl)-2h,8h-pyrano[3,2-g]chromen-2-one	C24 H28 O3	364.206	10.315	NA	S10297786	HMDB0030730	-0.0017	-4.7733	1	Phenylpropanoids and polyketides	Coumarins and derivatives	Pyranocoumarins	down
10.316_310.2867	0.0449	0.0001	0.0111	DOR:NOR	C18:pos	Mfcd00065147	C20 H38 O2	310.287	10.316	NA	S4516584	HMDB0034451	5e-04	1.6499	11	Lipids and lipid-like molecules	Fatty Acyls	Fatty acid esters	down
10.316_396.2323	0.0385	0.0001	0.0106	DOR:NOR	C18:pos	NA	C24 H33 N2 O P	396.232	10.316	NA	NA	NA	NA	NA	0	NA	NA	NA	down
10.318_338.2814	31.218	0.0004	0.0219	DOR:NOR	C18:pos	NA	C21 H38 O3	338.281	10.318	NA	NA	NA	NA	NA	0	NA	NA	NA	up
10.318_576.5109	46.469	0.0018	0.0407	DOR:NOR	C18:pos	3-[(19z)-15,16-dihydroxy-19-dotriaconten-1-yl]-5-methyl-2(5h)-furanone	C37 H68 O4	576.511	10.318	NA	S35013921	HMDB0035397	8e-04	1.4408	2	Lipids and lipid-like molecules	Fatty Acyls	Fatty alcohols	up
10.32_594.521	179.839	0.0008	0.0285	DOR:NOR	C18:pos	1-palmitoyl-2-oleoyl-sn-glycerol	C37 H70 O5	594.521	10.32	NA	S4445454	HMDB0007102	0.0013	2.1916	20	Lipids and lipid-like molecules	Glycerolipids	Diradylglycerols	up
10.32_688.4863	0.0866	0.1534	0.385	DOR:NOR	C18:pos	NA	C38 H75 O4 P3	688.486	10.32	NA	NA	NA	NA	NA	0	NA	NA	NA	other
10.321_396.4073	0.7089	0.2851	0.4305	DOR:NOR	C18:pos	NA	C25 H52 N2 O	396.407	10.321	NA	NA	NA	NA	NA	0	NA	NA	NA	other
10.321_815.5648	0.0217	0.1565	0.3863	DOR:NOR	C18:pos	O-{hydroxy[(2r)-2-[(11z,14z)-11,14-icosadienoyloxy]-3-(stearoyloxy)propoxy]phosphoryl}-l-serine	C44 H82 N O10 P	815.565	10.321	NA	S74875820	HMDB0112376	0.0028	3.4433	14	Lipids and lipid-like molecules	Glycerophospholipids	Glycerophosphoserines	other
10.322_696.6485	0.5141	0.1973	0.396	DOR:NOR	C18:pos	NA	C41 H84 N4 O4	696.649	10.322	NA	NA	NA	NA	NA	0	NA	NA	NA	other
10.323_421.2865	0.8195	0.74	0.7821	DOR:NOR	C18:pos	NA	C23 H40 N3 O2 P	421.286	10.323	NA	NA	NA	NA	NA	0	NA	NA	NA	other
10.323_427.303	0.7094	0.365	0.4602	DOR:NOR	C18:pos	NA	C24 H46 N O P S	427.303	10.323	NA	NA	NA	NA	NA	0	NA	NA	NA	other
10.324_312.266	20.4671	0.007	0.0827	DOR:NOR	C18:pos	NA	C19 H36 O3	312.266	10.324	NA	NA	NA	NA	NA	0	NA	NA	NA	up
10.324_382.3918	0.8485	0.6235	0.6812	DOR:NOR	C18:pos	NA	C24 H50 N2 O	382.392	10.324	NA	NA	NA	NA	NA	0	NA	NA	NA	other
10.328_416.3278	0.1041	0.1368	0.3662	DOR:NOR	C18:pos	Calcitriol	C27 H44 O3	416.328	10.328	C01673	S4444108	HMDB0001903	0.0013	3.0388	17	Lipids and lipid-like molecules	Steroids and steroid derivatives	Vitamin D and derivatives	other
10.357_408.3206	0.6682	0.4594	0.5364	DOR:NOR	C18:pos	NA	C20 H44 N2 O6	408.321	10.357	NA	NA	NA	NA	NA	0	NA	NA	NA	other
10.367_283.2872	0.4787	0.2958	0.4346	DOR:NOR	C18:pos	Amide c18	C18 H37 N O	283.287	10.367	NA	S29032	HMDB0034146	3e-04	1.0675	1	Lipids and lipid-like molecules	Fatty Acyls	Fatty amides	other
10.368_771.5387	0.0536	0.1787	0.3915	DOR:NOR	C18:pos	NA	C41 H80 N3 O4 P3	771.539	10.368	NA	NA	NA	NA	NA	0	NA	NA	NA	other
10.376_403.3444	0.04	0.0637	0.246	DOR:NOR	C18:pos	NA	C26 H45 N O2	403.344	10.376	NA	NA	NA	NA	NA	0	NA	NA	NA	other
10.376_408.2998	0.0583	0.058	0.2348	DOR:NOR	C18:pos	NA	C25 H45 P S	408.3	10.376	NA	NA	NA	NA	NA	0	NA	NA	NA	other
10.385_646.4771	0.056	0.1796	0.3915	DOR:NOR	C18:pos	NA	C32 H69 N6 O P3	646.477	10.385	NA	NA	NA	NA	NA	0	NA	NA	NA	other
10.393_434.3366	0.0873	0.001	0.0325	DOR:NOR	C18:pos	NA	C21 H47 N4 O3 P	434.337	10.393	NA	NA	NA	NA	NA	0	NA	NA	NA	down
10.4_390.2213	0.0214	0.002	0.0434	DOR:NOR	C18:pos	(8beta,11alpha,15r)-16,16-difluoro-15-hydroxy-9-oxo-11,15-epoxyprostan-1-oic acid	C20 H32 F2 O5	390.221	10.4	NA	S571057	HMDB0015180	5e-04	1.1989	1	Lipids and lipid-like molecules	Fatty Acyls	Eicosanoids	down
10.401_358.2841	0.0682	0.0037	0.0609	DOR:NOR	C18:pos	NA	C19 H38 N2 O4	358.284	10.401	NA	NA	NA	NA	NA	0	NA	NA	NA	down
10.409_400.3336	0.1152	0.2101	0.4006	DOR:NOR	C18:pos	7a-hydroxy-cholestene-3-one	C27 H44 O2	400.334	10.409	C05455	S110306	HMDB0001993	6e-04	1.4391	13	Lipids and lipid-like molecules	Steroids and steroid derivatives	Cholestane steroids	other
10.429_791.5652	0.0524	0.2206	0.4006	DOR:NOR	C18:pos	1,2-distearoyl-sn-glycero-3-phosphoserine	C42 H82 N O10 P	791.565	10.429	NA	S7826046	HMDB0012378	0.0025	3.1013	5	Lipids and lipid-like molecules	Glycerophospholipids	Glycerophosphoserines	other
10.433_666.5192	108.018	0.0007	0.0285	DOR:NOR	C18:pos	1-oleoyl-2-(4z,7z,10z,13z,16z,19z-docosahexaenoyl)-sn-glycerol	C43 H70 O5	666.519	10.433	NA	S7822840	HMDB0007237	0.0031	4.6609	39	Lipids and lipid-like molecules	Glycerolipids	Diradylglycerols	up
10.436_672.4918	0.0314	0.0799	0.2765	DOR:NOR	C18:pos	NA	C48 H64 O2	672.492	10.436	NA	NA	NA	NA	NA	0	NA	NA	NA	other
10.438_771.5384	0.0534	0.2208	0.4006	DOR:NOR	C18:pos	NA	C49 H74 N O4 P	771.538	10.438	NA	NA	NA	NA	NA	0	NA	NA	NA	other
10.463_444.3597	0.0231	0.0014	0.0364	DOR:NOR	C18:pos	3beta-hydroxy-4beta-methyl-5alpha-cholest-8-ene-4alpha-carboxylic acid	C29 H48 O3	444.36	10.463	NA	S24850081	HMDB0062384	6e-04	1.4625	2	Lipids and lipid-like molecules	Prenol lipids	Triterpenoids	down
10.463_484.3525	0.0177	0.0022	0.0455	DOR:NOR	C18:pos	NA	C26 H48 N2 O6	484.353	10.463	NA	NA	NA	NA	NA	0	NA	NA	NA	down
10.473_454.3415	0.0315	0.0012	0.0345	DOR:NOR	C18:pos	NA	C27 H51 O P S	454.341	10.473	NA	NA	NA	NA	NA	0	NA	NA	NA	down
10.479_670.4778	0.0419	0.1692	0.389	DOR:NOR	C18:pos	NA	C39 H67 N4 O P S	670.478	10.479	NA	NA	NA	NA	NA	0	NA	NA	NA	other
10.484_338.2813	55.6762	0.0013	0.0362	DOR:NOR	C18:pos	NA	C21 H38 O3	338.281	10.484	NA	NA	NA	NA	NA	0	NA	NA	NA	up
10.485_658.4925	130.733	0.0004	0.0233	DOR:NOR	C18:pos	NA	C41 H71 O2 P S	658.492	10.485	NA	NA	NA	NA	NA	0	NA	NA	NA	up
10.486_620.5368	316.172	0.0004	0.0219	DOR:NOR	C18:pos	1,2-dioleoyl-sn-glycerol	C39 H72 O5	620.537	10.486	NA	S7822666	HMDB0007218	0.0011	1.8464	25	Lipids and lipid-like molecules	Glycerolipids	Diradylglycerols	up
10.486_642.5185	530.825	0	0.0106	DOR:NOR	C18:pos	NA	C36 H70 N2 O7	642.519	10.486	NA	NA	NA	NA	NA	0	NA	NA	NA	up
10.487_637.563	363.539	0.0006	0.0265	DOR:NOR	C18:pos	NA	C39 H75 N O5	637.563	10.487	NA	NA	NA	NA	NA	0	NA	NA	NA	up
10.492_252.2062	1.0437	0.7259	0.7703	DOR:NOR	C18:pos	NA	C12 H24 N6	252.206	10.492	NA	NA	NA	NA	NA	0	NA	NA	NA	other
10.516_425.3277	1.2894	0.3248	0.4414	DOR:NOR	C18:pos	NA	C22 H44 N5 O P	425.328	10.516	NA	NA	NA	NA	NA	0	NA	NA	NA	other
10.518_457.3542	1.1501	0.4716	0.5469	DOR:NOR	C18:pos	NA	C23 H48 N5 O2 P	457.354	10.518	NA	NA	NA	NA	NA	0	NA	NA	NA	other
10.542_431.3749	0.0346	0.2136	0.4006	DOR:NOR	C18:pos	NA	C22 H50 N5 O P	431.375	10.542	NA	NA	NA	NA	NA	0	NA	NA	NA	other
10.56_424.3311	0.0412	0.1327	0.3602	DOR:NOR	C18:pos	NA	C25 H40 N6	424.331	10.56	NA	NA	NA	NA	NA	0	NA	NA	NA	other
10.56_440.3047	0.0578	0.1111	0.3352	DOR:NOR	C18:pos	NA	C18 H45 N6 O2 P S	440.305	10.56	NA	NA	NA	NA	NA	0	NA	NA	NA	other
10.575_817.5818	0.0472	0.2172	0.4006	DOR:NOR	C18:pos	O-(hydroxy{(2r)-2-(icosanoyloxy)-3-[(11z)-11-octadecenoyloxy]propoxy}phosphoryl)-l-serine	C44 H84 N O10 P	817.582	10.575	NA	S74875835	HMDB0112392	0.0015	1.8828	14	Lipids and lipid-like molecules	Glycerophospholipids	Glycerophosphoserines	other
10.61_646.477	0.0344	0.2213	0.4006	DOR:NOR	C18:pos	NA	C36 H71 O5 P S	646.477	10.61	NA	NA	NA	NA	NA	0	NA	NA	NA	other
10.626_630.4822	0.0424	0.1051	0.326	DOR:NOR	C18:pos	NA	C43 H66 O S	630.482	10.626	NA	NA	NA	NA	NA	0	NA	NA	NA	other
10.668_672.4918	0.0289	0.2516	0.4078	DOR:NOR	C18:pos	NA	C37 H64 N6 O5	672.492	10.668	NA	NA	NA	NA	NA	0	NA	NA	NA	other
10.67_667.5374	0.0557	0.2392	0.4048	DOR:NOR	C18:pos	NA	C43 H75 N P2	667.537	10.67	NA	NA	NA	NA	NA	0	NA	NA	NA	other
10.677_384.3384	0.1513	0.1764	0.3915	DOR:NOR	C18:pos	2224119	C27 H44 O	384.338	10.677	C00599	S82602	HMDB0000921	8e-04	2.1792	17	Lipids and lipid-like molecules	Steroids and steroid derivatives	Cholestane steroids	other
10.684_392.237	0.1251	0.0306	0.1721	DOR:NOR	C18:pos	Methyl (2e,4z,6e,8e,10e,12e,14e,16e,18e)-4,8,13,17-tetramethyl-20-oxo-2,4,6,8,10,12,14,16,18-henicosanonaenoate	C26 H32 O3	392.237	10.684	NA	S30776929	HMDB0031977	-0.0018	-4.6338	1	Lipids and lipid-like molecules	Prenol lipids	Diterpenoids	down
10.685_365.365	0.4065	0.0592	0.2367	DOR:NOR	C18:pos	NA	C24 H47 N O	365.365	10.685	NA	NA	NA	NA	NA	0	NA	NA	NA	other
10.686_656.4979	0.0418	0.0821	0.2811	DOR:NOR	C18:pos	NA	C38 H73 O4 P S	656.498	10.686	NA	NA	NA	NA	NA	0	NA	NA	NA	other
10.701_484.3314	0.0339	0	0.005	DOR:NOR	C18:pos	NA	C31 H49 P S	484.331	10.701	NA	NA	NA	NA	NA	0	NA	NA	NA	down
10.702_428.3647	0.0225	0.0018	0.0407	DOR:NOR	C18:pos	4alpha-hydroxymethyl-4beta-methylzymosterol	C29 H48 O2	428.365	10.702	NA	S20059526	HMDB0062390	8e-04	1.7527	3	Lipids and lipid-like molecules	Prenol lipids	Triterpenoids	down
10.702_468.3573	0.0275	0.0039	0.0628	DOR:NOR	C18:pos	NA	C26 H48 N2 O5	468.357	10.702	NA	NA	NA	NA	NA	0	NA	NA	NA	down
10.761_663.5794	79.0978	0.0016	0.0397	DOR:NOR	C18:pos	NA	C35 H78 N5 O4 P	663.579	10.761	NA	NA	NA	NA	NA	0	NA	NA	NA	up
10.761_668.5346	343.788	0.0003	0.0218	DOR:NOR	C18:pos	1-stearoyl-2-(4z,7z,10z,13z,16z,19z)-docosahexaenoyl-sn-glycerol	C43 H72 O5	668.535	10.761	NA	S7822831	HMDB0007179	0.0033	4.999	44	Lipids and lipid-like molecules	Glycerolipids	Diradylglycerols	up
10.854_654.4823	0.0399	0.1874	0.3926	DOR:NOR	C18:pos	NA	C39 H67 N4 P S	654.482	10.854	NA	NA	NA	NA	NA	0	NA	NA	NA	other
10.866_674.5339	0.026	0.0002	0.0169	DOR:NOR	C18:pos	N-myristoylsphingosine-1-phosphocholine	C37 H75 N2 O6 P	674.534	10.866	NA	S9608732	HMDB0012097	0.0023	3.4388	1	Lipids and lipid-like molecules	Sphingolipids	Phosphosphingolipids	down
10.87_674.5068	0.0738	0.2445	0.4068	DOR:NOR	C18:pos	NA	C37 H66 N6 O5	674.507	10.87	NA	NA	NA	NA	NA	0	NA	NA	NA	other
10.913_480.3941	1.3977	0.0663	0.2509	DOR:NOR	C18:pos	NA	C27 H53 N4 O P	480.394	10.913	NA	NA	NA	NA	NA	0	NA	NA	NA	other
10.922_654.4824	0.0378	0.1021	0.3226	DOR:NOR	C18:pos	NA	C38 H71 O4 P S	654.482	10.922	NA	NA	NA	NA	NA	0	NA	NA	NA	other
10.937_703.5131	0.0379	0.0018	0.0407	DOR:NOR	C18:pos	1-myristoyl-2-palmitoleoyl-sn-glycero-3-phosphocholine	C38 H74 N O8 P	703.513	10.937	NA	S24766547	HMDB0007870	0.0021	3.056	18	Lipids and lipid-like molecules	Glycerophospholipids	Glycerophosphocholines	down
10.94_700.5498	0.0267	0	0.0091	DOR:NOR	C18:pos	NA	C39 H77 N2 O6 P	700.55	10.94	NA	NA	NA	NA	NA	0	NA	NA	NA	down
10.952_444.2153	11.0482	0.2706	0.421	DOR:NOR	C18:pos	5a-hydroxy-13-methoxy-5,5,7a,9,14b-pentamethyl-1,2,5a,6,7,7a,10,14,14a,14b-decahydro-5h-furo[3,4-i]oxepino[4,3-a]xanthene-3,12-dione	C25 H32 O7	444.215	10.952	NA	S26460157	HMDB0030156	-5e-04	-1.0849	1	Organoheterocyclic compounds	Benzopyrans	1-benzopyrans	other
11.054_694.5492	46.855	0.0137	0.1123	DOR:NOR	C18:pos	NA	C42 H79 O3 P S	694.549	11.054	NA	NA	NA	NA	NA	0	NA	NA	NA	up
11.056_729.5288	0.018	0.0068	0.0815	DOR:NOR	C18:pos	1,2-dipalmitoleoyl-sn-glycero-3-phosphocholine	C40 H76 N O8 P	729.529	11.056	NA	S24766671	HMDB0008002	0.0021	2.8317	21	Lipids and lipid-like molecules	Glycerophospholipids	Glycerophosphocholines	down
11.057_779.544	0.0419	0.037	0.1877	DOR:NOR	C18:pos	Pc(18:3(9z,12z,15z)/18:2(9z,12z))	C44 H78 N O8 P	779.544	11.057	NA	S24766866	HMDB0008204	0.0025	3.1493	50	Lipids and lipid-like molecules	Glycerophospholipids	Glycerophosphocholines	down
11.059_391.7243	0.0371	0.0108	0.0983	DOR:NOR	C18:pos	NA	NA	391.724	11.059	NA	NA	NA	NA	NA	0	NA	NA	NA	down
11.127_755.5436	0.0098	0.0077	0.0849	DOR:NOR	C18:pos	1-palmitoyl-2-[(9z,12z,15z)-octadecatrienoyl]-sn-glycero-3-phosphocholine	C42 H78 N O8 P	755.544	11.127	NA	S24766646	HMDB0007975	0.0029	3.872	32	Lipids and lipid-like molecules	Glycerophospholipids	Glycerophosphocholines	down
11.128_845.5127	0.0305	0.0168	0.1252	DOR:NOR	C18:pos	NA	C45 H78 N5 O2 P3 S	845.513	11.128	NA	NA	NA	NA	NA	0	NA	NA	NA	down
11.132_812.6753	326.739	0.0005	0.0235	DOR:NOR	C18:pos	N-[(15z)-tetracosenoyl]sphing-4-enine-1-phosphocholine	C47 H93 N2 O6 P	812.675	11.132	NA	S24846874	HMDB0012107	0.0018	2.1785	1	Lipids and lipid-like molecules	Sphingolipids	Phosphosphingolipids	up
11.175_805.5602	0.0278	0.0281	0.1654	DOR:NOR	C18:pos	1-hexadecanoyl-2-(4z,7z,10z,13z,16z,19z-docosahexaenoyl)-sn-glycero-3-phosphocholine	C46 H80 N O8 P	805.56	11.175	NA	S4946007	HMDB0007991	0.0019	2.3425	48	Lipids and lipid-like molecules	Glycerophospholipids	Glycerophosphocholines	down
11.177_429.7399	0.0644	0.0512	0.2188	DOR:NOR	C18:pos	NA	NA	429.74	11.177	NA	NA	NA	NA	NA	0	NA	NA	NA	other
11.262_781.5598	0.0099	0.0119	0.103	DOR:NOR	C18:pos	5212188	C44 H80 N O8 P	781.56	11.262	NA	S4450312	HMDB0008138	0.0024	3.0305	45	Lipids and lipid-like molecules	Glycerophospholipids	Glycerophosphocholines	down
11.262_871.5287	0.0298	0.0237	0.1512	DOR:NOR	C18:pos	NA	C49 H79 N O8 P2	871.529	11.262	NA	NA	NA	NA	NA	0	NA	NA	NA	down
11.284_384.3385	0.0796	0.0273	0.1633	DOR:NOR	C18:pos	Cholest-4-en-3-one	C27 H44 O	384.339	11.284	C00599	M231	NA	7e-04	1.9246	17	Lipids and lipid-like molecules	Steroids and steroid derivatives	Cholestane steroids	down
11.37_795.498	0.0162	0.0001	0.0111	DOR:NOR	C18:pos	NA	C42 H76 N3 O5 P3	795.498	11.37	NA	NA	NA	NA	NA	0	NA	NA	NA	down
11.371_705.5289	0.0068	0.0005	0.0235	DOR:NOR	C18:pos	(9r)-6-hydroxy-6-oxido-12-oxo-5,7,11-trioxa-2-aza-6lambda~5~-phosphaheptacosan-9-yl palmitate	C38 H76 N O8 P	705.529	11.371	NA	S7825981	HMDB0010567	0.002	2.8763	10	Lipids and lipid-like molecules	Glycerophospholipids	Glycerophosphoethanolamines	down
11.374_702.5656	0.0046	0.0001	0.0106	DOR:NOR	C18:pos	Palmitoyl sphingomyelin	C39 H79 N2 O6 P	702.566	11.374	null	M4865	HMDB0061712	0.0019	2.7615	2	Lipids and lipid-like molecules	Sphingolipids	Phosphosphingolipids	down
11.389_805.5603	0.0284	0.017	0.1252	DOR:NOR	C18:pos	1-hexadecanoyl-2-(4z,7z,10z,13z,16z,19z-docosahexaenoyl)-sn-glycero-3-phosphocholine	C46 H80 N O8 P	805.56	11.389	NA	S4946007	HMDB0007991	0.0019	2.3271	48	Lipids and lipid-like molecules	Glycerophospholipids	Glycerophosphocholines	down
11.418_807.5758	0.0366	0.0329	0.1765	DOR:NOR	C18:pos	1-hexadecanoyl-2-[(7z,10z,13z,16z,19z)-docosapentaenoyl]-sn-glycero-3-phosphocholine	C46 H82 N O8 P	807.576	11.418	NA	S24766660	HMDB0007990	0.002	2.4354	50	Lipids and lipid-like molecules	Glycerophospholipids	Glycerophosphocholines	down
11.422_737.6377	0.0382	0.0329	0.1765	DOR:NOR	C18:pos	NA	C42 H83 N5 O5	737.638	11.422	NA	NA	NA	NA	NA	0	NA	NA	NA	down
11.446_821.5141	0.0068	0.0008	0.0285	DOR:NOR	C18:pos	NA	C40 H76 N3 O12 P	821.514	11.446	NA	NA	NA	NA	NA	0	NA	NA	NA	down
11.447_731.5444	0.0044	0.0002	0.0166	DOR:NOR	C18:pos	1-tetradecanoyl-2-[(9z)-octadecenoyl]-sn-glycero-3-phosphocholine	C40 H78 N O8 P	731.544	11.447	NA	S24766549	HMDB0007873	0.0021	2.8828	24	Lipids and lipid-like molecules	Glycerophospholipids	Glycerophosphocholines	down
11.447_754.0273	0.0635	0.0361	0.1853	DOR:NOR	C18:pos	NA	C22 H25 N6 O16 P3 S	754.027	11.447	NA	NA	NA	NA	NA	0	NA	NA	NA	down
11.462_689.4972	0.0151	0.0003	0.0218	DOR:NOR	C18:pos	1-oleoyl-2-myristoyl-sn-glycero-3-phosphoethanolamine	C37 H72 N O8 P	689.497	11.462	NA	S24768524	HMDB0009052	0.0024	3.4912	16	Lipids and lipid-like molecules	Glycerophospholipids	Glycerophosphoethanolamines	down
11.476_789.5292	0.0451	0.0933	0.3065	DOR:NOR	C18:pos	(2r)-3-{[(2-aminoethoxy)(hydroxy)phosphoryl]oxy}-2-[(9z,12z)-9,12-octadecadienoyloxy]propyl (7z,10z,13z,16z,19z)-7,10,13,16,19-docosapentaenoate	C45 H76 N O8 P	789.529	11.476	NA	S24769098	HMDB0009654	0.0017	2.1045	38	Lipids and lipid-like molecules	Glycerophospholipids	Glycerophosphoethanolamines	other
11.506_871.5287	0.0136	0.0031	0.0556	DOR:NOR	C18:pos	NA	C39 H78 N5 O14 P	871.529	11.506	NA	NA	NA	NA	NA	0	NA	NA	NA	down
11.508_781.5598	0.0045	0.0012	0.0345	DOR:NOR	C18:pos	5212188	C44 H80 N O8 P	781.56	11.508	NA	S4450312	HMDB0008138	0.0023	3.0005	45	Lipids and lipid-like molecules	Glycerophospholipids	Glycerophosphocholines	down
11.522_739.5137	0.0167	0.0052	0.0719	DOR:NOR	C18:pos	1,2-dilinoleoyl-sn-glycero-3-phosphatidylethanolamine	C41 H74 N O8 P	739.514	11.522	NA	S7825762	HMDB0009093	0.0015	2.0476	40	Lipids and lipid-like molecules	Glycerophospholipids	Glycerophosphoethanolamines	down
11.535_618.5183	5.9837	0.0011	0.0333	DOR:NOR	C18:pos	NA	C38 H72 N2 P2	618.518	11.535	NA	NA	NA	NA	NA	0	NA	NA	NA	up
11.538_368.3436	0.1887	0.0018	0.0407	DOR:NOR	C18:pos	NA	C27 H44	368.344	11.538	NA	NA	NA	NA	NA	0	NA	NA	NA	down
11.556_559.4931	0.0316	0.0055	0.073	DOR:NOR	C18:pos	NA	C31 H65 N3 O5	559.493	11.556	NA	NA	NA	NA	NA	0	NA	NA	NA	down
11.569_829.5583	0.0108	0.0091	0.0895	DOR:NOR	C18:pos	1,2-di-o-arachidonoyl-sn-glycero-3-phosphocholine	C48 H80 N O8 P	829.558	11.569	NA	S24767104	HMDB0008443	0.0039	4.6517	34	Lipids and lipid-like molecules	Glycerophospholipids	Glycerophosphocholines	down
11.571_897.5449	0.036	0.0154	0.1194	DOR:NOR	C18:pos	NA	C45 H82 N5 O7 P3	897.545	11.571	NA	NA	NA	NA	NA	0	NA	NA	NA	down
11.582_807.5759	0.0083	0.0091	0.0895	DOR:NOR	C18:pos	1-hexadecanoyl-2-[(7z,10z,13z,16z,19z)-docosapentaenoyl]-sn-glycero-3-phosphocholine	C46 H82 N O8 P	807.576	11.582	NA	S24766660	HMDB0007990	0.0019	2.3605	50	Lipids and lipid-like molecules	Glycerophospholipids	Glycerophosphocholines	down
11.598_765.528	0.0151	0.0142	0.1141	DOR:NOR	C18:pos	1-oleoyl-2-arachidonoyl-sn-glycerol-3-phosphoethanolamine	C43 H76 N O8 P	765.528	11.598	NA	S24768534	HMDB0009069	0.0029	3.756	52	Lipids and lipid-like molecules	Glycerophospholipids	Glycerophosphoethanolamines	down
11.604_757.5594	0.0043	0.0002	0.0164	DOR:NOR	C18:pos	Pc	C42 H80 N O8 P	757.559	11.604	NA	S4450224	HMDB0007973	0.0027	3.6284	28	Lipids and lipid-like molecules	Glycerophospholipids	Glycerophosphocholines	down
11.604_857.4845	0.0306	0	0.0091	DOR:NOR	C18:pos	NA	C58 H67 N O3 S	857.485	11.604	NA	NA	NA	NA	NA	0	NA	NA	NA	down
11.605_389.7648	0.0314	0.0008	0.0286	DOR:NOR	C18:pos	NA	NA	389.765	11.605	NA	NA	NA	NA	NA	0	NA	NA	NA	down
11.605_780.0429	0.0142	0.0011	0.033	DOR:NOR	C18:pos	Emblicanin b	C34 H20 O22	780.043	11.605	NA	S8007884	HMDB0030436	0.0017	2.2055	1	Phenylpropanoids and polyketides	Tannins	Hydrolyzable tannins	down
11.605_847.5283	0.0054	0	0.0063	DOR:NOR	C18:pos	NA	C41 H80 N5 O7 P3	847.528	11.605	NA	NA	NA	NA	NA	0	NA	NA	NA	down
11.606_477.322	0.0355	0.0003	0.0196	DOR:NOR	C18:pos	NA	C24 H48 N O6 P	477.322	11.606	NA	NA	NA	NA	NA	0	NA	NA	NA	down
11.61_669.6025	123.563	0.0002	0.0164	DOR:NOR	C18:pos	NA	C41 H84 N O P S	669.602	11.61	NA	NA	NA	NA	NA	0	NA	NA	NA	up
11.619_715.5133	0.016	0.0009	0.0298	DOR:NOR	C18:pos	1-hexadecanoyl-2-(9z,12z-octadecadienoyl)-sn-glycero-3-phosphoethanolamine	C39 H74 N O8 P	715.513	11.619	NA	S7825697	HMDB0008928	0.0019	2.6304	19	Lipids and lipid-like molecules	Glycerophospholipids	Glycerophosphoethanolamines	down
11.634_704.5809	0.0213	0.0002	0.0169	DOR:NOR	C18:pos	N-palmitoyldihydrosphingomyelin	C39 H81 N2 O6 P	704.581	11.634	NA	S8115586	HMDB0062665	0.0023	3.2994	2	Lipids and lipid-like molecules	Sphingolipids	Phosphosphingolipids	down
11.642_560.4412	0.3293	0.0225	0.1462	DOR:NOR	C18:pos	NA	C32 H65 O3 P S	560.441	11.642	NA	NA	NA	NA	NA	0	NA	NA	NA	down
11.642_636.4715	0.0586	0.0673	0.2509	DOR:NOR	C18:pos	NA	C30 H65 N6 O6 P	636.471	11.642	NA	NA	NA	NA	NA	0	NA	NA	NA	other
11.676_719.5447	0.0317	0.0078	0.085	DOR:NOR	C18:pos	1-hexadecanoyl-2-octadecanoyl-sn-glycero-3-phosphoethanolamine	C39 H78 N O8 P	719.545	11.676	NA	S4484107	HMDB0008925	0.0018	2.4789	11	Lipids and lipid-like molecules	Glycerophospholipids	Glycerophosphoethanolamines	down
11.678_410.7615	0.0194	0.0024	0.0466	DOR:NOR	C18:pos	NA	NA	410.762	11.678	NA	NA	NA	NA	NA	0	NA	NA	NA	down
11.68_873.5442	0.008	0.0024	0.0466	DOR:NOR	C18:pos	NA	C48 H82 N3 O5 P3	873.544	11.68	NA	NA	NA	NA	NA	0	NA	NA	NA	down
11.681_783.5753	0.0029	0.0007	0.0285	DOR:NOR	C18:pos	1-oleoyl-2-linoleoyl-sn-glycero-3-phosphocholine	C44 H82 N O8 P	783.575	11.681	NA	S24766767	HMDB0008105	0.0026	3.2552	32	Lipids and lipid-like molecules	Glycerophospholipids	Glycerophosphocholines	down
11.691_639.5789	66.5471	0.0025	0.0472	DOR:NOR	C18:pos	NA	C39 H77 N O5	639.579	11.691	NA	NA	NA	NA	NA	0	NA	NA	NA	up
11.694_644.5343	285.241	0.0013	0.0362	DOR:NOR	C18:pos	NA	C40 H74 N2 P2	644.534	11.694	NA	NA	NA	NA	NA	0	NA	NA	NA	up
11.695_791.5436	0.0223	0.079	0.2745	DOR:NOR	C18:pos	1-octadecanoyl-2-(4z,7z,10z,13z,16z,19z-docosahexaenoyl)-sn-glycero-3-phosphoethanolamine	C45 H78 N O8 P	791.544	11.695	NA	S7825748	HMDB0009012	0.0029	3.7185	50	Lipids and lipid-like molecules	Glycerophospholipids	Glycerophosphoethanolamines	other
11.696_741.529	0.0129	0.0053	0.0719	DOR:NOR	C18:pos	1-oleoyl-2-linoleyl-sn-glycero-3-phosphoethanolamine	C41 H76 N O8 P	741.529	11.696	NA	S7825703	HMDB0009060	0.0019	2.5005	36	Lipids and lipid-like molecules	Glycerophospholipids	Glycerophosphoethanolamines	down
11.703_833.5914	0.0462	0.0669	0.2509	DOR:NOR	C18:pos	1-stearoyl-2-docosahexanoyl-sn-glycero-3-phosphocholine	C48 H84 N O8 P	833.591	11.703	NA	S24767388	HMDB0008727	0.002	2.4326	38	Lipids and lipid-like molecules	Glycerophospholipids	Glycerophosphocholines	other
11.731_751.5969	0.0327	0.0169	0.1252	DOR:NOR	C18:pos	NA	NA	751.597	11.731	NA	NA	NA	NA	NA	0	NA	NA	NA	down
11.731_775.0868	0.0281	0.0004	0.0226	DOR:NOR	C18:pos	NA	NA	775.087	11.731	NA	NA	NA	NA	NA	0	NA	NA	NA	down
11.732_752.6031	0.0282	0.0372	0.1878	DOR:NOR	C18:pos	NA	C41 H81 N6 O4 P	752.603	11.732	NA	NA	NA	NA	NA	0	NA	NA	NA	down
11.733_842.572	0.0325	0.0403	0.1933	DOR:NOR	C18:pos	NA	C46 H80 N6 O4 P2	842.572	11.733	NA	NA	NA	NA	NA	0	NA	NA	NA	down
11.734_463.3059	0.0617	0.0066	0.0799	DOR:NOR	C18:pos	NA	C23 H46 N O6 P	463.306	11.734	NA	NA	NA	NA	NA	0	NA	NA	NA	down
11.739_757.2114	1.6171	0.7645	0.8015	DOR:NOR	C18:pos	NA	C41 H45 Cl N3 O P S3	757.211	11.739	NA	NA	NA	NA	NA	0	NA	NA	NA	other
11.757_745.5603	0.0236	0.0123	0.1056	DOR:NOR	C18:pos	1-stearoyl-2-oleoyl-sn-glycero-3-phosphoethanolamine zwitterion	C41 H80 N O8 P	745.56	11.757	NA	S7825692	HMDB0008993	0.0018	2.4304	28	Lipids and lipid-like molecules	Glycerophospholipids	Glycerophosphoethanolamines	down
11.788_686.4863	0.0402	0.095	0.3103	DOR:NOR	C18:pos	(2r)-1-(pentadecanoyloxy)-3-(phosphonooxy)-2-propanyl (11z,14z)-11,14-icosadienoate	C38 H71 O8 P	686.486	11.788	NA	S74877246	HMDB0115508	0.0023	3.3975	2	Lipids and lipid-like molecules	Glycerophospholipids	Glycerophosphates	other
11.792_784.5787	0.0131	0.0047	0.0699	DOR:NOR	C18:pos	NA	C37 H81 N6 O9 P	784.579	11.792	NA	NA	NA	NA	NA	0	NA	NA	NA	down
11.793_410.7616	0.0444	0.0052	0.0719	DOR:NOR	C18:pos	NA	NA	410.762	11.793	NA	NA	NA	NA	NA	0	NA	NA	NA	down
11.793_805.5572	0.0088	0.0047	0.0699	DOR:NOR	C18:pos	N-[(2s,3r,4e)-1-{[4-o-(beta-d-galactopyranosyl)-beta-d-glucopyranosyl]oxy}-3-hydroxy-4-octadecen-2-yl]dodecanamide	C42 H79 N O13	805.557	11.793	NA	S58145727	NA	-0.0021	-2.6349	2	NA	NA	NA	down
11.794_873.5442	0.0207	0.005	0.0716	DOR:NOR	C18:pos	NA	C43 H82 N5 O7 P3	873.544	11.794	NA	NA	NA	NA	NA	0	NA	NA	NA	down
11.801_388.7191	0.0271	0.0154	0.1194	DOR:NOR	C18:pos	NA	NA	388.719	11.801	NA	NA	NA	NA	NA	0	NA	NA	NA	down
11.802_723.5186	0.0116	0.0078	0.085	DOR:NOR	C18:pos	1-(1z-hexadecenyl)-2-arachidonoyl-sn-glycero-3-phosphoethanolamine	C41 H74 N O7 P	723.519	11.802	NA	S24769238	HMDB0011352	0.0017	2.2936	14	Lipids and lipid-like molecules	Glycerophospholipids	Glycerophosphoethanolamines	down
11.803_586.4568	0.1146	0.0048	0.0702	DOR:NOR	C18:pos	NA	C34 H69 O P3	586.457	11.803	NA	NA	NA	NA	NA	0	NA	NA	NA	down
11.824_809.5916	0.0166	0.0134	0.1109	DOR:NOR	C18:pos	Pc	C46 H84 N O8 P	809.592	11.824	NA	S17347139	HMDB0008048	0.0019	2.3097	41	Lipids and lipid-like molecules	Glycerophospholipids	Glycerophosphocholines	down
11.827_899.5616	0.0419	0.0258	0.1588	DOR:NOR	C18:pos	NA	C41 H82 N5 O14 P	899.562	11.827	NA	NA	NA	NA	NA	0	NA	NA	NA	down
11.834_789.5494	59.3796	0.0002	0.0169	DOR:NOR	C18:pos	1-stearoyl-2-oleoyl-sn-glycero-3-phosphoserine	C42 H80 N O10 P	789.549	11.834	NA	S7826037	HMDB0010163	0.0026	3.3036	12	Lipids and lipid-like molecules	Glycerophospholipids	Glycerophosphoserines	up
11.862_670.5501	212.288	0.0014	0.0364	DOR:NOR	C18:pos	NA	C39 H70 N6 O3	670.55	11.862	NA	NA	NA	NA	NA	0	NA	NA	NA	up
11.883_749.5329	0.014	0.0181	0.1306	DOR:NOR	C18:pos	(2r)-3-{[(2-aminoethoxy)(hydroxy)phosphoryl]oxy}-2-[(1z,11z)-1,11-octadecadien-1-yloxy]propyl (5z,8z,11z,14z)-5,8,11,14-icosatetraenoate	C43 H76 N O7 P	749.533	11.883	NA	S24768864	HMDB0009413	0.0031	4.0995	14	Lipids and lipid-like molecules	Glycerophospholipids	Glycerophosphoethanolamines	down
11.898_607.5173	0.036	0.0104	0.0958	DOR:NOR	C18:pos	NA	C41 H69 N S	607.517	11.898	NA	NA	NA	NA	NA	0	NA	NA	NA	down
11.899_612.4712	0.009	0.0046	0.0696	DOR:NOR	C18:pos	NA	C35 H60 N6 O3	612.471	11.899	NA	NA	NA	NA	NA	0	NA	NA	NA	down
11.942_662.4873	0.0172	0.0286	0.1666	DOR:NOR	C18:pos	(2r)-1-(octanoyloxy)-3-(phosphonooxy)-2-propanyl 22-methyltetracosanoate	C36 H71 O8 P	662.487	11.942	NA	S74877422	HMDB0115684	0.0013	1.9543	20	Lipids and lipid-like molecules	Glycerophospholipids	Glycerophosphates	down
12.014_809.5914	0.0249	0.0024	0.0466	DOR:NOR	C18:pos	Pc	C46 H84 N O8 P	809.591	12.014	NA	S17347139	HMDB0008048	0.0021	2.5733	41	Lipids and lipid-like molecules	Glycerophospholipids	Glycerophosphocholines	down
12.026_756.0425	0.0356	0.0004	0.0229	DOR:NOR	C18:pos	NA	C22 H27 N6 O16 P3 S	756.043	12.026	NA	NA	NA	NA	NA	0	NA	NA	NA	down
12.026_823.5295	0.0058	0	0.0039	DOR:NOR	C18:pos	NA	C41 H77 N O15	823.529	12.026	NA	NA	NA	NA	NA	0	NA	NA	NA	down
12.027_733.5599	0.0063	0.0048	0.0702	DOR:NOR	C18:pos	Dl-dipalmitoylphosphatidylcholine	C40 H80 N O8 P	733.56	12.027	NA	M889	NA	0.0022	3.0364	11	NA	NA	NA	down
12.037_767.5439	0.0308	0.0043	0.0668	DOR:NOR	C18:pos	1-stearoyl-2-arachidonoyl-sn-glycero-3-phosphoethanolamine	C43 H78 N O8 P	767.544	12.037	C21480	S4451158	HMDB0009003	0.0026	3.4371	50	Lipids and lipid-like molecules	Glycerophospholipids	Glycerophosphoethanolamines	down
12.05_688.5019	0.0211	0.0489	0.2163	DOR:NOR	C18:pos	(2r)-2-(pentadecanoyloxy)-3-(phosphonooxy)propyl (11z)-11-icosenoate	C38 H73 O8 P	688.502	12.05	NA	S74876835	HMDB0115093	0.0025	3.5648	1	Lipids and lipid-like molecules	Glycerophospholipids	Glycerophosphates	down
12.076_638.487	0.0124	0.0357	0.1851	DOR:NOR	C18:pos	NA	C40 H68 N2 P2	638.487	12.076	NA	NA	NA	NA	NA	0	NA	NA	NA	down
12.078_616.5051	0.019	0.0394	0.1909	DOR:NOR	C18:pos	(s)-glyceryl 1,2-dilinoleate	C39 H68 O5	616.505	12.078	NA	S7822679	HMDB0007248	0.0015	2.4795	41	Lipids and lipid-like molecules	Fatty Acyls	Lineolic acids and derivatives	down
2.102_283.0912	0.1262	0.0506	0.2188	DOR:NOR	C18:pos	8-hydroxy-deoxyguanosine	C10 H13 N5 O5	283.091	2.102	NA	S66049	HMDB0003333	5e-04	1.773	2	Nucleosides, nucleotides, and analogues	Purine nucleosides	Purine 2'-deoxyribonucleosides	other
2.104_151.0495	0.1331	0.0567	0.2329	DOR:NOR	C18:pos	Guanine	C5 H5 N5 O	151.049	2.104	C00242	S744	HMDB0000132	-1e-04	-0.6178	3	Organoheterocyclic compounds	Imidazopyrimidines	Purines and purine derivatives	other
2.133_268.0804	0.0193	0.0092	0.0899	DOR:NOR	C18:pos	Inosine	C10 H12 N4 O5	268.08	2.133	C00294	BGI328	NA	4e-04	1.4902	5	Nucleosides, nucleotides, and analogues	Purine nucleosides	null	down
2.252_161.0511	13.8733	0.9455	0.9524	DOR:NOR	C18:pos	S-allylcysteine	C6 H11 N O2 S	161.051	2.252	NA	S88744	HMDB0034323	-1e-04	-0.3897	2	Organic acids and derivatives	Carboxylic acids and derivatives	Amino acids, peptides, and analogues	other
2.342_204.0569	47.1276	0.3518	0.4522	DOR:NOR	C18:pos	NA	C7 H12 N2 O3 S	204.057	2.342	NA	NA	NA	NA	NA	0	NA	NA	NA	other
2.354_265.1788	272.443	0.1583	0.3863	DOR:NOR	C18:pos	NA	C14 H23 N3 O2	265.179	2.354	NA	NA	NA	NA	NA	0	NA	NA	NA	other
2.42_114.0318	0.4946	0.1901	0.3939	DOR:NOR	C18:pos	3635	C5 H6 O3	114.032	2.42	NA	S3757733	HMDB0031859	-1e-04	-1.0151	2	Organoheterocyclic compounds	Dihydrofurans	Furanones	other
2.456_187.0846	44.811	0.241	0.4049	DOR:NOR	C18:pos	6-acetamido-2-oxohexanoic acid	C8 H13 N O4	187.085	2.456	C05548	S168403	HMDB0012150	-2e-04	-0.8848	1	Organic acids and derivatives	Keto acids and derivatives	Medium-chain keto acids and derivatives	other
2.478_283.1891	231.053	0.1595	0.3863	DOR:NOR	C18:pos	NA	C14 H25 N3 O3	283.189	2.478	NA	NA	NA	NA	NA	0	NA	NA	NA	other
2.479_438.2835	116.842	0.1556	0.3863	DOR:NOR	C18:pos	NA	C22 H38 N4 O5	438.284	2.479	NA	NA	NA	NA	NA	0	NA	NA	NA	other
2.549_394.257	75.7515	0.1516	0.385	DOR:NOR	C18:pos	NA	C20 H34 N4 O4	394.257	2.549	NA	NA	NA	NA	NA	0	NA	NA	NA	other
2.554_216.1473	6.8968	0.5139	0.5861	DOR:NOR	C18:pos	Valylvaline	C10 H20 N2 O3	216.147	2.554	NA	S362559	HMDB0029140	1e-04	0.2744	1	Organic acids and derivatives	Carboxylic acids and derivatives	Amino acids, peptides, and analogues	other
2.634_376.2465	22.4763	0.2328	0.4035	DOR:NOR	C18:pos	NA	C20 H32 N4 O3	376.247	2.634	NA	NA	NA	NA	NA	0	NA	NA	NA	other
2.637_311.2201	8.752	0.2273	0.4007	DOR:NOR	C18:pos	NA	C16 H29 N3 O3	311.22	2.637	NA	NA	NA	NA	NA	0	NA	NA	NA	other
2.638_283.1891	11.1526	0.1629	0.3874	DOR:NOR	C18:pos	NA	C14 H25 N3 O3	283.189	2.638	NA	NA	NA	NA	NA	0	NA	NA	NA	other
2.652_341.1577	0.1979	0.0684	0.2516	DOR:NOR	C18:pos	NA	C17 H30 N P3	341.158	2.652	NA	NA	NA	NA	NA	0	NA	NA	NA	other
2.673_109.0706	1.5752	0.0291	0.1675	DOR:NOR	C18:pos	NA	NA	109.071	2.673	NA	NA	NA	NA	NA	0	NA	NA	NA	up
2.673_148.0525	0.1549	0.0793	0.2749	DOR:NOR	C18:pos	Cinnamic acid	C9 H8 O2	148.053	2.673	NA	S392447	HMDB0000930	-1e-04	-0.8404	13	Phenylpropanoids and polyketides	Cinnamic acids and derivatives	Cinnamic acids	other
2.675_102.047	0.1542	0.0627	0.2447	DOR:NOR	C18:pos	NA	C8 H6	102.047	2.675	NA	NA	NA	NA	NA	0	NA	NA	NA	other
2.676_110.0738	1.541	0.0665	0.2509	DOR:NOR	C18:pos	NA	NA	110.074	2.676	NA	NA	NA	NA	NA	0	NA	NA	NA	other
2.677_157.0826	1.4489	0.0144	0.1148	DOR:NOR	C18:pos	NA	NA	157.083	2.677	NA	NA	NA	NA	NA	0	NA	NA	NA	up
2.697_171.0898	11.6774	0.1319	0.3602	DOR:NOR	C18:pos	NA	C8 H13 N O3	171.09	2.697	NA	NA	NA	NA	NA	0	NA	NA	NA	other
2.706_394.257	29.1729	0.1599	0.3863	DOR:NOR	C18:pos	NA	C20 H34 N4 O4	394.257	2.706	NA	NA	NA	NA	NA	0	NA	NA	NA	other
2.72_422.2883	4.9731	0.2411	0.4049	DOR:NOR	C18:pos	NA	C22 H38 N4 O4	422.288	2.72	NA	NA	NA	NA	NA	0	NA	NA	NA	other
2.721_153.0791	11.2882	0.1322	0.3602	DOR:NOR	C18:pos	Dopamine	C8 H11 N O2	153.079	2.721	C03758	M4	NA	-1e-04	-0.516	3	Benzenoids	Phenols	Benzenediols	other
2.734_408.2729	5.2116	0.2401	0.4048	DOR:NOR	C18:pos	(2z)-n-(3-aminopropyl)-n-{4-[(3-aminopropyl)amino]butyl}-3-(4-hydroxy-3,5-dimethoxyphenyl)acrylamide	C21 H36 N4 O4	408.273	2.734	NA	S30777010	HMDB0033479	8e-04	1.9013	1	Phenylpropanoids and polyketides	Cinnamic acids and derivatives	Hydroxycinnamic acids and derivatives	other
2.735_110.0739	1.8975	0.1183	0.3437	DOR:NOR	C18:pos	NA	NA	110.074	2.735	NA	NA	NA	NA	NA	0	NA	NA	NA	other
2.741_100.0619	1.4857	0.036	0.1851	DOR:NOR	C18:pos	NA	NA	100.062	2.741	NA	NA	NA	NA	NA	0	NA	NA	NA	up
2.741_148.0526	0.1533	0.0679	0.2509	DOR:NOR	C18:pos	Cinnamic acid	C9 H8 O2	148.053	2.741	NA	S392447	HMDB0000930	-1e-04	-0.8873	13	Phenylpropanoids and polyketides	Cinnamic acids and derivatives	Cinnamic acids	other
2.741_156.0797	1.5342	0.0226	0.1462	DOR:NOR	C18:pos	NA	NA	156.08	2.741	NA	NA	NA	NA	NA	0	NA	NA	NA	up
2.741_174.1092	1.4888	0.0513	0.2188	DOR:NOR	C18:pos	NA	NA	174.109	2.741	NA	NA	NA	NA	NA	0	NA	NA	NA	other
2.741_452.2604	1.6755	0.0767	0.2701	DOR:NOR	C18:pos	NA	C17 H36 N6 O8	452.26	2.741	NA	NA	NA	NA	NA	0	NA	NA	NA	other
2.742_102.047	0.1531	0.0677	0.2509	DOR:NOR	C18:pos	NA	C8 H6	102.047	2.742	NA	NA	NA	NA	NA	0	NA	NA	NA	other
2.742_109.0706	1.5391	0.0317	0.1731	DOR:NOR	C18:pos	NA	NA	109.071	2.742	NA	NA	NA	NA	NA	0	NA	NA	NA	up
2.743_165.0791	0.1513	0.0695	0.2544	DOR:NOR	C18:pos	L-phenylalanine	C9 H11 N O2	165.079	2.743	C00079	M8	NA	-1e-04	-0.8483	11	Organic acids and derivatives	Carboxylic acids and derivatives	Amino acids, peptides, and analogues	other
2.744_174.186	0.9612	0.7865	0.8201	DOR:NOR	C18:pos	NA	NA	174.186	2.744	NA	NA	NA	NA	NA	0	NA	NA	NA	other
2.747_119.0736	0.1537	0.0664	0.2509	DOR:NOR	C18:pos	NA	C8 H9 N	119.074	2.747	NA	NA	NA	NA	NA	0	NA	NA	NA	other
2.787_185.1052	3.8233	0.1283	0.3563	DOR:NOR	C18:pos	(2r,3s)-3-hydroxy-8-methyl-8-azabicyclo[3.2.1]octane-2-carboxylic acid	C9 H15 N O3	185.105	2.787	C10858	S391305	HMDB0006548	0	-0.1752	6	Alkaloids and derivatives	Tropane alkaloids	null	other
2.8_224.1099	0.1409	0.1085	0.3299	DOR:NOR	C18:pos	NA	C9 H22 O2 P2	224.11	2.8	NA	NA	NA	NA	NA	0	NA	NA	NA	other
2.809_154.0744	2.0204	0.5506	0.6183	DOR:NOR	C18:pos	NA	C7 H10 N2 O2	154.074	2.809	NA	NA	NA	NA	NA	0	NA	NA	NA	other
2.81_99.0685	3.2227	0.002	0.0434	DOR:NOR	C18:pos	To0110000	C5 H9 N O	99.0685	2.81	NA	S12144	HMDB0011749	-1e-04	-0.7092	4	Organoheterocyclic compounds	Piperidines	Piperidinones	up
2.898_438.2837	100.731	0.1547	0.3851	DOR:NOR	C18:pos	NA	C20 H43 N2 O6 P	438.284	2.898	NA	NA	NA	NA	NA	0	NA	NA	NA	other
2.899_218.1267	2.7977	0.7391	0.7816	DOR:NOR	C18:pos	Meprobamate	C9 H18 N2 O4	218.127	2.899	NA	S3924	HMDB0014515	0	-0.0792	9	Organic acids and derivatives	Carboxylic acids and derivatives	Amino acids, peptides, and analogues	other
2.947_231.147	0.0853	0.0309	0.1721	DOR:NOR	C18:pos	C4-carnitine	C11 H21 N O4	231.147	2.947	NA	S184820	HMDB0002013	1e-04	0.4627	4	Lipids and lipid-like molecules	Fatty Acyls	Fatty acid esters	down
2.948_376.2468	200.105	0.1614	0.3863	DOR:NOR	C18:pos	NA	C20 H32 N4 O3	376.247	2.948	NA	NA	NA	NA	NA	0	NA	NA	NA	other
2.998_202.1319	6.8817	0.5305	0.6006	DOR:NOR	C18:pos	Mfcd00025555	C9 H18 N2 O3	202.132	2.998	NA	S227831	HMDB0028691	-1e-04	-0.6148	5	Organic acids and derivatives	Carboxylic acids and derivatives	Amino acids, peptides, and analogues	other
3_306.151	0.0304	0.0105	0.0966	DOR:NOR	C18:pos	NA	NA	306.151	3	NA	NA	NA	NA	NA	0	NA	NA	NA	down
3.029_222.1005	0.1187	0.0742	0.2647	DOR:NOR	C18:pos	Gly-phe	C11 H14 N2 O3	222.101	3.029	NA	S87926	HMDB0028848	-1e-04	-0.3143	2	Organic acids and derivatives	Carboxylic acids and derivatives	Amino acids, peptides, and analogues	other
3.076_188.1163	0.7984	0.4135	0.4971	DOR:NOR	C18:pos	Glycyl-l-leucine	C8 H16 N2 O3	188.116	3.076	C02155	M430	NA	-2e-04	-0.8193	9	Organic acids and derivatives	Carboxylic acids and derivatives	Amino acids, peptides, and analogues	other
3.078_487.3156	87.1276	0.1538	0.3851	DOR:NOR	C18:pos	NA	C24 H46 N3 O5 P	487.316	3.078	NA	NA	NA	NA	NA	0	NA	NA	NA	other
3.081_239.1732	5.1547	0.1313	0.3602	DOR:NOR	C18:pos	NA	NA	239.173	3.081	NA	NA	NA	NA	NA	0	NA	NA	NA	other
3.082_194.1156	5.2271	0.1072	0.3292	DOR:NOR	C18:pos	Peg-4	C8 H18 O5	194.116	3.082	NA	S7908	HMDB0094708	-2e-04	-1.1736	1	Organic oxygen compounds	Organooxygen compounds	Ethers	other
3.093_169.0741	0.0996	0.1392	0.3691	DOR:NOR	C18:pos	Noradrenaline	C8 H11 N O3	169.074	3.093	NA	S926	HMDB0037685	-2e-04	-1.3663	6	Benzenoids	Phenols	Benzenediols	other
3.099_232.1422	3.4879	0.9042	0.9204	DOR:NOR	C18:pos	3,3'-(1,4-butanediyldiimino)dipropanoic acid	C10 H20 N2 O4	232.142	3.099	NA	S146146	HMDB0013075	1e-04	0.3188	5	Organic acids and derivatives	Carboxylic acids and derivatives	Amino acids, peptides, and analogues	other
3.131_219.1108	0.0735	0.0198	0.1373	DOR:NOR	C18:pos	Pantothenic acid	C9 H17 N O5	219.111	3.131	C00864	BGI462	NA	-1e-04	-0.4483	2	Organooxygen compounds	Alcohols and polyols	Polyols	down
3.147_394.257	102.711	0.1577	0.3863	DOR:NOR	C18:pos	NA	C20 H34 N4 O4	394.257	3.147	NA	NA	NA	NA	NA	0	NA	NA	NA	other
3.153_194.1156	2.835	0.0905	0.3015	DOR:NOR	C18:pos	Peg-4	C8 H18 O5	194.116	3.153	NA	S7908	HMDB0094708	-2e-04	-0.941	1	Organic oxygen compounds	Organooxygen compounds	Ethers	other
3.161_246.1214	0.2303	0.1646	0.3874	DOR:NOR	C18:pos	Asp-leu	C10 H18 N2 O5	246.121	3.161	NA	S295006	HMDB0028757	2e-04	0.6795	9	Organic acids and derivatives	Carboxylic acids and derivatives	Amino acids, peptides, and analogues	other
3.172_505.3264	65.1613	0.1544	0.3851	DOR:NOR	C18:pos	NA	C26 H43 N5 O5	505.326	3.172	NA	NA	NA	NA	NA	0	NA	NA	NA	other
3.194_205.1316	0.4479	0.7412	0.7827	DOR:NOR	C18:pos	Panthenol	C9 H19 N O4	205.132	3.194	NA	S4516	HMDB0004231	-2e-04	-0.7754	1	Lipids and lipid-like molecules	Fatty Acyls	Fatty amides	other
3.216_134.0946	5.8289	0.0672	0.2509	DOR:NOR	C18:pos	2-(2-hydroxypropoxy)-1-propanol	C6 H14 O3	134.095	3.216	NA	S30467	HMDB0032478	-3e-04	-2.0423	1	Organooxygen compounds	Alcohols and polyols	Secondary alcohols	other
3.228_230.1631	11.7023	0.043	0.1994	DOR:NOR	C18:pos	Leu-val	C11 H22 N2 O3	230.163	3.228	NA	S312585	HMDB0028942	0	-0.2075	4	Organic acids and derivatives	Carboxylic acids and derivatives	Amino acids, peptides, and analogues	up
3.25_159.0355	73.3226	0.3174	0.4412	DOR:NOR	C18:pos	NA	C6 H9 N O2 S	159.036	3.25	NA	NA	NA	NA	NA	0	NA	NA	NA	other
3.252_175.0845	19.6199	0.2615	0.4149	DOR:NOR	C18:pos	Apm	C7 H13 N O4	175.084	3.252	NA	S91360	HMDB0034252	0	-0.1869	5	Organic acids and derivatives	Carboxylic acids and derivatives	Amino acids, peptides, and analogues	other
3.266_192.0946	3.0329	0.0977	0.3155	DOR:NOR	C18:pos	NA	NA	192.095	3.266	NA	NA	NA	NA	NA	0	NA	NA	NA	other
3.267_191.0886	1.5732	0.0262	0.1598	DOR:NOR	C18:pos	NA	NA	191.089	3.267	NA	NA	NA	NA	NA	0	NA	NA	NA	up
3.282_252.1109	6.8207	0.56	0.6267	DOR:NOR	C18:pos	Ala-tyr	C12 H16 N2 O4	252.111	3.282	NA	S497607	HMDB0028699	1e-04	0.4782	6	Organic acids and derivatives	Carboxylic acids and derivatives	Amino acids, peptides, and analogues	other
3.283_533.358	17.2517	0.1562	0.3863	DOR:NOR	C18:pos	NA	C28 H55 N O4 S2	533.358	3.283	NA	NA	NA	NA	NA	0	NA	NA	NA	other
3.284_177.1267	19.5676	0.1449	0.3756	DOR:NOR	C18:pos	Bethanidine	C10 H15 N3	177.127	3.284	NA	S2278	HMDB0014362	-1e-04	-0.7865	1	Benzenoids	Benzene and substituted derivatives	null	other
3.3_149.078	1.5978	0.2881	0.4312	DOR:NOR	C18:pos	NA	NA	149.078	3.3	NA	NA	NA	NA	NA	0	NA	NA	NA	other
3.307_126.0318	33.315	0.3438	0.4498	DOR:NOR	C18:pos	Maltol	C6 H6 O3	126.032	3.307	C11918	M1404	NA	-1e-04	-0.4863	9	Organoheterocyclic compounds	Pyrans	Pyranones and derivatives	other
3.308_209.1212	1.8636	0.0293	0.1683	DOR:NOR	C18:pos	NA	NA	209.121	3.308	NA	NA	NA	NA	NA	0	NA	NA	NA	up
3.31_191.0887	1.6119	0.0313	0.1721	DOR:NOR	C18:pos	NA	NA	191.089	3.31	NA	NA	NA	NA	NA	0	NA	NA	NA	up
3.311_129.058	1.4353	0.9115	0.9262	DOR:NOR	C18:pos	Quinoline	C9 H7 N	129.058	3.311	C06413	M8753	NA	-2e-04	-1.2329	3	Organoheterocyclic compounds	Quinolines and derivatives	null	other
3.313_204.0901	0.101	0.0198	0.1373	DOR:NOR	C18:pos	L-tryptophan	C11 H12 N2 O2	204.09	3.313	C00078	BGI382	NA	-3e-04	-1.3047	8	Organoheterocyclic compounds	Indoles and derivatives	Indolyl carboxylic acids and derivatives	down
3.313_225.1161	1.9263	0.0472	0.2124	DOR:NOR	C18:pos	NA	C15 H15 N O	225.116	3.313	NA	NA	NA	NA	NA	0	NA	NA	NA	up
3.319_172.0672	16.1565	0.2826	0.429	DOR:NOR	C18:pos	NA	C7 H12 N2 O S	172.067	3.319	NA	NA	NA	NA	NA	0	NA	NA	NA	other
3.319_616.3934	62.5907	0.1519	0.385	DOR:NOR	C18:pos	NA	C32 H52 N6 O6	616.393	3.319	NA	NA	NA	NA	NA	0	NA	NA	NA	other
3.321_519.3425	28.0967	0.152	0.385	DOR:NOR	C18:pos	NA	C25 H50 N3 O6 P	519.342	3.321	NA	NA	NA	NA	NA	0	NA	NA	NA	other
3.334_175.0668	18.7958	0.501	0.5728	DOR:NOR	C18:pos	NA	C7 H13 N O2 S	175.067	3.334	NA	NA	NA	NA	NA	0	NA	NA	NA	other
3.341_187.0637	0.3237	0.1485	0.3819	DOR:NOR	C18:pos	Indole-3-acrylic acid	C11 H9 N O2	187.064	3.341	NA	M449	NA	-3e-04	-1.7764	1	NA	NA	NA	other
3.36_324.0809	2877.65	0.381	0.4725	DOR:NOR	C18:pos	NA	C11 H20 N2 O5 S2	324.081	3.36	NA	NA	NA	NA	NA	0	NA	NA	NA	other
3.361_326.0764	241.07	0.3658	0.4608	DOR:NOR	C18:pos	NA	C12 H15 N4 O5 P	326.076	3.361	NA	NA	NA	NA	NA	0	NA	NA	NA	other
3.391_156.0764	6.1477	0.0423	0.1972	DOR:NOR	C18:pos	NA	C4 H8 N6 O	156.076	3.391	NA	NA	NA	NA	NA	0	NA	NA	NA	up
3.393_134.0946	6.0096	0.0386	0.1909	DOR:NOR	C18:pos	2-(2-hydroxypropoxy)-1-propanol	C6 H14 O3	134.095	3.393	NA	S30467	HMDB0032478	-3e-04	-2.0635	1	Organooxygen compounds	Alcohols and polyols	Secondary alcohols	up
3.436_230.1631	8.3246	0.1605	0.3863	DOR:NOR	C18:pos	Leu-val	C11 H22 N2 O3	230.163	3.436	NA	S312585	HMDB0028942	0	-0.2075	4	Organic acids and derivatives	Carboxylic acids and derivatives	Amino acids, peptides, and analogues	other
3.44_298.1526	57.1964	0.2422	0.4057	DOR:NOR	C18:pos	NA	C14 H22 N2 O5	298.153	3.44	NA	NA	NA	NA	NA	0	NA	NA	NA	other
3.442_236.1161	10.8118	0.3366	0.4471	DOR:NOR	C18:pos	Hexobarbital	C12 H16 N2 O3	236.116	3.442	NA	S3482	HMDB0015444	0	-0.0717	5	Organoheterocyclic compounds	Diazines	Pyrimidines and pyrimidine derivatives	other
3.45_240.1473	93.5729	0.2033	0.3996	DOR:NOR	C18:pos	3477	C12 H20 N2 O3	240.147	3.45	NA	S4679	HMDB0015407	1e-04	0.247	1	Organoheterocyclic compounds	Pyridines and derivatives	Hydroxypyridines	other
3.534_283.199	3.5455	0.1281	0.3563	DOR:NOR	C18:pos	NA	NA	283.199	3.534	NA	NA	NA	NA	NA	0	NA	NA	NA	other
3.541_228.1474	1.1832	0.6013	0.6608	DOR:NOR	C18:pos	Leucylproline	C11 H20 N2 O3	228.147	3.541	null	M468	HMDB0011175	0	-0.1532	2	Organic acids and derivatives	Carboxylic acids and derivatives	Amino acids, peptides, and analogues	other
3.541_238.1416	3.8457	0.1082	0.3299	DOR:NOR	C18:pos	NA	C10 H22 O6	238.142	3.541	NA	NA	NA	NA	NA	0	NA	NA	NA	other
3.584_149.0779	0.3285	0.1389	0.3689	DOR:NOR	C18:pos	NA	NA	149.078	3.584	NA	NA	NA	NA	NA	0	NA	NA	NA	other
3.586_134.0944	11.3579	0.0512	0.2188	DOR:NOR	C18:pos	2-(2-hydroxypropoxy)-1-propanol	C6 H14 O3	134.094	3.586	NA	S30467	HMDB0032478	-1e-04	-1.0016	1	Organooxygen compounds	Alcohols and polyols	Secondary alcohols	other
3.593_191.0617	0.0162	0	0.0071	DOR:NOR	C18:pos	N-acetylmethionine	C7 H13 N O3 S	191.062	3.593	C02712	BGI423	NA	-1e-04	-0.7345	1	null	null	null	down
3.647_393.2259	128.524	0.1547	0.3851	DOR:NOR	C18:pos	NA	C20 H31 N3 O5	393.226	3.647	NA	NA	NA	NA	NA	0	NA	NA	NA	other
3.65_205.0952	11.3309	0.0503	0.2188	DOR:NOR	C18:pos	8-methyl-8-azabicyclo[3.2.1]octane-1,2,3,4,6-pentol	C8 H15 N O5	205.095	3.65	NA	S35014138	HMDB0036394	-2e-04	-1.1272	1	Alkaloids and derivatives	Tropane alkaloids	null	other
3.666_239.1317	17.783	0.7867	0.8201	DOR:NOR	C18:pos	(2e,4z)-1-(3,4-dihydro-1(2h)-pyridinyl)-2,4-undecadiene-8,10-diyn-1-one	C16 H17 N O	239.132	3.666	NA	S30777014	HMDB0033525	-7e-04	-3.0065	1	Organoheterocyclic compounds	Pyridines and derivatives	Hydropyridines	other
3.689_230.1631	5.5128	0.5756	0.6408	DOR:NOR	C18:pos	Leu-val	C11 H22 N2 O3	230.163	3.689	NA	S312585	HMDB0028942	0	-0.2075	4	Organic acids and derivatives	Carboxylic acids and derivatives	Amino acids, peptides, and analogues	other
3.693_258.1576	97.8376	0.2155	0.4006	DOR:NOR	C18:pos	NA	C12 H22 N2 O4	258.158	3.693	NA	NA	NA	NA	NA	0	NA	NA	NA	other
3.706_129.1521	2.2685	0.0146	0.1151	DOR:NOR	C18:pos	NA	C8 H19 N	129.152	3.706	NA	NA	NA	NA	NA	0	NA	NA	NA	up
3.706_188.125	1.8783	0.0204	0.1398	DOR:NOR	C18:pos	NA	NA	188.125	3.706	NA	NA	NA	NA	NA	0	NA	NA	NA	up
3.712_185.9676	204.731	0.339	0.4473	DOR:NOR	C18:pos	NA	C3 H8 O3 P2 S	185.968	3.712	NA	NA	NA	NA	NA	0	NA	NA	NA	other
3.712_261.9833	255.266	0.3416	0.4487	DOR:NOR	C18:pos	NA	C6 H6 N4 O4 S2	261.983	3.712	NA	NA	NA	NA	NA	0	NA	NA	NA	other
3.713_271.9916	45.6467	0.3413	0.4487	DOR:NOR	C18:pos	NA	C9 H8 N2 O4 S2	271.992	3.713	NA	NA	NA	NA	NA	0	NA	NA	NA	other
3.713_275.9624	39.0921	0.3437	0.4498	DOR:NOR	C18:pos	NA	C6 H6 N4 O3 P2 S	275.962	3.713	NA	NA	NA	NA	NA	0	NA	NA	NA	other
3.714_143.0584	21.9672	0.3196	0.4412	DOR:NOR	C18:pos	Trimethadione	C6 H9 N O3	143.058	3.714	NA	S5374	HMDB0014491	-2e-04	-1.0887	4	Organoheterocyclic compounds	Azolidines	Oxazolidines	other
3.714_217.9937	68.8101	0.3227	0.4414	DOR:NOR	C18:pos	NA	C4 H12 O4 P2 S	217.994	3.714	NA	NA	NA	NA	NA	0	NA	NA	NA	other
3.714_86.0191	271.237	0.3476	0.4502	DOR:NOR	C18:pos	Vinyl sulfide	C4 H6 S	86.0191	3.714	NA	S11817	HMDB0033922	-1e-04	-0.6208	2	Organosulfur compounds	Thioethers	Thioenol ethers	other
3.714_97.0528	12.7279	0.3108	0.4403	DOR:NOR	C18:pos	2,4-dimethyloxazole	C5 H7 N O	97.0528	3.714	NA	S122556	HMDB0032968	0	0.1397	4	Organoheterocyclic compounds	Azoles	Oxazoles	other
3.715_407.0025	329.028	0.3426	0.4494	DOR:NOR	C18:pos	NA	C12 H16 N3 O5 P3 S	407.002	3.715	NA	NA	NA	NA	NA	0	NA	NA	NA	other
3.716_131.0406	1163.17	0.3561	0.4556	DOR:NOR	C18:pos	NA	C5 H9 N O S	131.041	3.716	NA	NA	NA	NA	NA	0	NA	NA	NA	other
3.716_177.0461	2991.34	0.3666	0.4613	DOR:NOR	C18:pos	Formyl-l-methionyl peptide	C6 H11 N O3 S	177.046	3.716	C03145	BGI269	NA	-1e-04	-0.8013	4	null	null	null	other
3.718_232.9654	58.142	0.3196	0.4412	DOR:NOR	C18:pos	NA	C7 H N5 O P2	232.965	3.718	NA	NA	NA	NA	NA	0	NA	NA	NA	other
3.722_99.0684	2.9732	0.1879	0.3926	DOR:NOR	C18:pos	To0110000	C5 H9 N O	99.0684	3.722	NA	S12144	HMDB0011749	0	-0.4011	4	Organoheterocyclic compounds	Piperidines	Piperidinones	other
3.737_137.0479	0.2137	0.0509	0.2188	DOR:NOR	C18:pos	4-aminobenzoic acid	C7 H7 N O2	137.048	3.737	C00568	S953	HMDB0001392	-2e-04	-1.5966	8	Benzenoids	Benzene and substituted derivatives	Benzoic acids and derivatives	other
3.737_165.0428	0.0819	0.0362	0.1853	DOR:NOR	C18:pos	Coixol	C8 H7 N O3	165.043	3.737	NA	S10317	HMDB0036582	-2e-04	-1.2278	6	Organoheterocyclic compounds	Benzoxazoles	Benzoxazolones	down
3.758_194.029	1.7988	0.0083	0.086	DOR:NOR	C18:pos	NA	C5 H13 N2 P3	194.029	3.758	NA	NA	NA	NA	NA	0	NA	NA	NA	up
3.784_114.0682	0.8027	0.8557	0.8782	DOR:NOR	C18:pos	Epsilon-caprolactone	C6 H10 O2	114.068	3.784	C01880	S9972	HMDB0060476	-1e-04	-1.1537	18	Organoheterocyclic compounds	Lactones	null	other
3.817_351.2154	130.283	0.1583	0.3863	DOR:NOR	C18:pos	NA	C18 H29 N3 O4	351.215	3.817	NA	NA	NA	NA	NA	0	NA	NA	NA	other
3.822_173.1782	2.7973	0.0253	0.1571	DOR:NOR	C18:pos	NA	C10 H23 N O	173.178	3.822	NA	NA	NA	NA	NA	0	NA	NA	NA	up
3.83_147.0988	3.5619	0.7242	0.7689	DOR:NOR	C18:pos	NA	NA	147.099	3.83	NA	NA	NA	NA	NA	0	NA	NA	NA	other
3.83_220.115	3.1861	0.7989	0.8302	DOR:NOR	C18:pos	NA	C10 H22 O P2	220.115	3.83	NA	NA	NA	NA	NA	0	NA	NA	NA	other
3.831_174.1093	2.0283	0.4629	0.5397	DOR:NOR	C18:pos	NA	NA	174.109	3.831	NA	NA	NA	NA	NA	0	NA	NA	NA	other
3.833_207.1057	5.8693	0.7365	0.7793	DOR:NOR	C18:pos	NA	NA	207.106	3.833	NA	NA	NA	NA	NA	0	NA	NA	NA	other
3.834_239.1317	11.003	0.9695	0.9724	DOR:NOR	C18:pos	(2e,4z)-1-(3,4-dihydro-1(2h)-pyridinyl)-2,4-undecadiene-8,10-diyn-1-one	C16 H17 N O	239.132	3.834	NA	S30777014	HMDB0033525	-7e-04	-3.0065	1	Organoheterocyclic compounds	Pyridines and derivatives	Hydropyridines	other
3.834_254.1631	64.5143	0.1586	0.3863	DOR:NOR	C18:pos	NA	C13 H22 N2 O3	254.163	3.834	NA	NA	NA	NA	NA	0	NA	NA	NA	other
3.855_175.0635	15.5477	0.2781	0.426	DOR:NOR	C18:pos	Indole-3-acetate	C10 H9 N O2	175.064	3.855	C00954	BGI322	NA	-1e-04	-0.7691	4	Organoheterocyclic compounds	Indoles and derivatives	Indolyl carboxylic acids and derivatives	other
3.884_170.9991	0.0363	0.0356	0.185	DOR:NOR	C18:pos	NA	C6 H5 N O3 S	170.999	3.884	NA	NA	NA	NA	NA	0	NA	NA	NA	down
3.908_116.0951	33.8483	0.0849	0.2869	DOR:NOR	C18:pos	Tetramethylurea	C5 H12 N2 O	116.095	3.908	NA	S11930	HMDB0062789	-1e-04	-1.2649	2	Organic acids and derivatives	Organic carbonic acids and derivatives	Ureas	other
3.908_282.1674	2.1732	0.1875	0.3926	DOR:NOR	C18:pos	Mm3670000	C12 H26 O7	282.167	3.908	NA	S16521	HMDB0061822	4e-04	1.4092	1	Organic oxygen compounds	Organooxygen compounds	Ethers	other
3.957_244.1787	15.6781	0.1081	0.3299	DOR:NOR	C18:pos	Leu-leu	C12 H24 N2 O3	244.179	3.957	NA	S85053	HMDB0028933	0	0.0564	4	Organic acids and derivatives	Carboxylic acids and derivatives	Amino acids, peptides, and analogues	other
3.985_260.1456	0.0385	0.0696	0.2544	DOR:NOR	C18:pos	NA	NA	260.146	3.985	NA	NA	NA	NA	NA	0	NA	NA	NA	other
3.999_351.2154	68.8578	0.1645	0.3874	DOR:NOR	C18:pos	NA	C18 H29 N3 O4	351.215	3.999	NA	NA	NA	NA	NA	0	NA	NA	NA	other
4.01_148.9704	32.1347	0.0632	0.2451	DOR:NOR	C18:pos	NA	C4 H4 Cl N O S	148.97	4.01	NA	NA	NA	NA	NA	0	NA	NA	NA	other
4.023_250.0411	0.011	0.1487	0.3819	DOR:NOR	C18:pos	NA	C11 H10 N2 O3 S	250.041	4.023	NA	NA	NA	NA	NA	0	NA	NA	NA	other
4.052_171.0897	0.1056	0.0325	0.1757	DOR:NOR	C18:pos	NA	NA	171.09	4.052	NA	NA	NA	NA	NA	0	NA	NA	NA	down
4.056_127.1004	4.8135	0.1316	0.3602	DOR:NOR	C18:pos	NA	NA	127.1	4.056	NA	NA	NA	NA	NA	0	NA	NA	NA	other
4.057_154.1109	19.9706	0.1078	0.3299	DOR:NOR	C18:pos	NA	C8 H14 N2 O	154.111	4.057	NA	NA	NA	NA	NA	0	NA	NA	NA	other
4.057_199.1688	19.1643	0.1084	0.3299	DOR:NOR	C18:pos	Diethylcarbamazine	C10 H21 N3 O	199.169	4.057	NA	S2944	HMDB0014849	-3e-04	-1.6947	1	Organoheterocyclic compounds	Diazinanes	Piperazines	other
4.057_85.0529	4.465	0.1174	0.3429	DOR:NOR	C18:pos	2-pyrrolidone	C4 H7 N O	85.0529	4.057	NA	S11530	HMDB0002039	-1e-04	-1.0068	2	Organoheterocyclic compounds	Pyrrolidines	Pyrrolidones	other
4.065_172.0939	0.1482	0.0221	0.1452	DOR:NOR	C18:pos	NA	NA	172.094	4.065	NA	NA	NA	NA	NA	0	NA	NA	NA	down
4.078_178.0792	0.2063	0.1503	0.3848	DOR:NOR	C18:pos	NA	C6 H16 N2 P2	178.079	4.078	NA	NA	NA	NA	NA	0	NA	NA	NA	other
4.166_260.1457	0.0314	0.0755	0.2668	DOR:NOR	C18:pos	NA	NA	260.146	4.166	NA	NA	NA	NA	NA	0	NA	NA	NA	other
4.191_343.22	1.5584	0.3122	0.4405	DOR:NOR	C18:pos	NA	C18 H35 N O P2	343.22	4.191	NA	NA	NA	NA	NA	0	NA	NA	NA	other
4.193_462.2844	66.0675	0.163	0.3874	DOR:NOR	C18:pos	NA	C22 H43 N2 O6 P	462.284	4.193	NA	NA	NA	NA	NA	0	NA	NA	NA	other
4.194_326.1936	1.5311	0.3233	0.4414	DOR:NOR	C18:pos	Heptaethylene glycol	C14 H30 O8	326.194	4.194	NA	S72017	HMDB0061835	5e-04	1.4312	1	Organic oxygen compounds	Organooxygen compounds	Ethers	other
4.205_179.0948	77.6324	0.3412	0.4487	DOR:NOR	C18:pos	3,4-methylenedioxyamphetamine	C10 H13 N O2	179.095	4.205	NA	S1555	HMDB0041931	-2e-04	-0.8622	11	Organoheterocyclic compounds	Benzodioxoles	null	other
4.232_244.1787	6.8861	0.3304	0.4434	DOR:NOR	C18:pos	Leu-leu	C12 H24 N2 O3	244.179	4.232	NA	S85053	HMDB0028933	0	-0.1936	4	Organic acids and derivatives	Carboxylic acids and derivatives	Amino acids, peptides, and analogues	other
4.233_182.0557	0.1952	0.2464	0.4068	DOR:NOR	C18:pos	NA	C5 H6 N6 O2	182.056	4.233	NA	NA	NA	NA	NA	0	NA	NA	NA	other
4.234_142.0632	0.3202	0.3307	0.4435	DOR:NOR	C18:pos	Mesifurane	C7 H10 O3	142.063	4.234	NA	S55261	HMDB0034230	-2e-04	-1.7333	5	Organoheterocyclic compounds	Dihydrofurans	Furanones	other
4.236_200.1051	0.1304	0.2501	0.4074	DOR:NOR	C18:pos	(+/-)-camphoric acid	C10 H16 O4	200.105	4.236	NA	S20198	HMDB0034491	-3e-04	-1.3074	7	Organic acids and derivatives	Carboxylic acids and derivatives	Dicarboxylic acids and derivatives	other
4.259_119.0735	6.0804	0.2883	0.4312	DOR:NOR	C18:pos	NA	C8 H9 N	119.073	4.259	NA	NA	NA	NA	NA	0	NA	NA	NA	other
4.259_193.074	2933	0.3867	0.4746	DOR:NOR	C18:pos	Phenylacetylglycine	C10 H11 N O3	193.074	4.259	C05598	M540	NA	-1e-04	-0.6665	10	Organic acids and derivatives	Carboxylic acids and derivatives	Amino acids, peptides, and analogues	other
4.259_238.1315	41.9853	0.5291	0.5994	DOR:NOR	C18:pos	Seconal	C12 H18 N2 O3	238.131	4.259	NA	S5005	HMDB0014562	2e-04	1.016	2	Organoheterocyclic compounds	Diazines	Pyrimidines and pyrimidine derivatives	other
4.259_310.0008	71.0458	0.3314	0.4436	DOR:NOR	C18:pos	NA	C10 H6 N4 O6 S	310.001	4.259	NA	NA	NA	NA	NA	0	NA	NA	NA	other
4.259_310.037	214.132	0.3464	0.4502	DOR:NOR	C18:pos	NA	C11 H10 N4 O5 S	310.037	4.259	NA	NA	NA	NA	NA	0	NA	NA	NA	other
4.259_324.0164	165.108	0.3433	0.4498	DOR:NOR	C18:pos	NA	C11 H10 N4 O4 P2	324.016	4.259	NA	NA	NA	NA	NA	0	NA	NA	NA	other
4.259_439.0585	351.624	0.3541	0.4541	DOR:NOR	C18:pos	NA	NA	439.058	4.259	NA	NA	NA	NA	NA	0	NA	NA	NA	other
4.259_632.1315	155.326	0.3454	0.4502	DOR:NOR	C18:pos	NA	C47 H21 O P	632.131	4.259	NA	NA	NA	NA	NA	0	NA	NA	NA	other
4.259_75.0322	124.29	0.3378	0.4472	DOR:NOR	C18:pos	Glycine	C2 H5 N O2	75.0322	4.259	C00037	S730	HMDB0000123	-2e-04	-2.1621	3	Organic acids and derivatives	Carboxylic acids and derivatives	Amino acids, peptides, and analogues	other
4.26_248.9933	102.57	0.337	0.4471	DOR:NOR	C18:pos	NA	C9 H4 N3 O4 P	248.993	4.26	NA	NA	NA	NA	NA	0	NA	NA	NA	other
4.26_296.0216	163.621	0.3444	0.4501	DOR:NOR	C18:pos	NA	C10 H8 N4 O5 S	296.022	4.26	NA	NA	NA	NA	NA	0	NA	NA	NA	other
4.26_408.1289	475.251	0.3569	0.4557	DOR:NOR	C18:pos	NA	C15 H25 N2 O9 P	408.129	4.26	NA	NA	NA	NA	NA	0	NA	NA	NA	other
4.261_299.2203	46.9111	0.3267	0.4415	DOR:NOR	C18:pos	NA	C15 H29 N3 O3	299.22	4.261	NA	NA	NA	NA	NA	0	NA	NA	NA	other
4.262_292.9981	295.426	0.3499	0.4511	DOR:NOR	C18:pos	NA	C7 H9 N3 O6 P2	292.998	4.262	NA	NA	NA	NA	NA	0	NA	NA	NA	other
4.275_172.0738	9.1032	0.3362	0.4471	DOR:NOR	C18:pos	On1225000	C8 H12 O4	172.074	4.275	NA	S4436353	HMDB0038601	-3e-04	-1.6932	6	Lipids and lipid-like molecules	Fatty Acyls	Fatty acid esters	other
4.275_234.1104	15.0908	0.4456	0.5231	DOR:NOR	C18:pos	NA	C10 H18 O6	234.11	4.275	NA	NA	NA	NA	NA	0	NA	NA	NA	other
4.286_126.0683	0.2631	0.2387	0.4048	DOR:NOR	C18:pos	J3048615r1	C7 H10 O2	126.068	4.286	NA	S4481192	HMDB0029582	-2e-04	-1.7483	12	Lipids and lipid-like molecules	Fatty Acyls	Fatty acid esters	other
4.287_80.0627	0.6391	0.3136	0.4406	DOR:NOR	C18:pos	NA	C6 H8	80.0627	4.287	NA	NA	NA	NA	NA	0	NA	NA	NA	other
4.29_476.2635	54.6242	0.2262	0.4006	DOR:NOR	C18:pos	NA	C22 H41 N2 O7 P	476.264	4.29	NA	NA	NA	NA	NA	0	NA	NA	NA	other
4.307_274.1349	0.0113	0.0326	0.1759	DOR:NOR	C18:pos	NA	C12 H22 N2 O3 S	274.135	4.307	NA	NA	NA	NA	NA	0	NA	NA	NA	down
4.352_119.0373	0.1928	0.1238	0.3494	DOR:NOR	C18:pos	Phenylisocyanate	C7 H5 N O	119.037	4.352	NA	S7389	HMDB0062270	-2e-04	-1.3559	1	Benzenoids	Benzene and substituted derivatives	null	other
4.354_137.0479	0.2027	0.1157	0.3413	DOR:NOR	C18:pos	Anthranilate	C7 H7 N O2	137.048	4.354	C00108	BGI159	NA	-2e-04	-1.6833	8	Benzenoids	Benzene and substituted derivatives	Benzoic acids and derivatives	other
4.382_260.0463	47.884	0.3521	0.4522	DOR:NOR	C18:pos	NA	C9 H12 N2 O5 S	260.046	4.382	NA	NA	NA	NA	NA	0	NA	NA	NA	other
4.392_152.0475	10.0145	0.004	0.0629	DOR:NOR	C18:pos	Resorcinol monoacetate	C8 H8 O3	152.048	4.392	C12064	BGI499	NA	-2e-04	-1.0871	31	null	null	null	up
4.428_244.1788	8.6835	0.4223	0.5015	DOR:NOR	C18:pos	Leu-leu	C12 H24 N2 O3	244.179	4.428	NA	S85053	HMDB0028933	-1e-04	-0.5685	4	Organic acids and derivatives	Carboxylic acids and derivatives	Amino acids, peptides, and analogues	other
4.438_355.2465	48.3644	0.3498	0.4511	DOR:NOR	C18:pos	NA	C18 H33 N3 O4	355.247	4.438	NA	NA	NA	NA	NA	0	NA	NA	NA	other
4.439_370.2199	1.2593	0.4278	0.5066	DOR:NOR	C18:pos	Ped-diol (n=8)	C16 H34 O9	370.22	4.439	NA	S71135	HMDB0094680	4e-04	1.0752	1	Organic oxygen compounds	Organooxygen compounds	Ethers	other
4.439_387.2465	1.286	0.4186	0.4985	DOR:NOR	C18:pos	NA	C17 H33 N5 O5	387.247	4.439	NA	NA	NA	NA	NA	0	NA	NA	NA	other
4.456_339.2516	16.3024	0.1752	0.3915	DOR:NOR	C18:pos	NA	C18 H33 N3 O3	339.252	4.456	NA	NA	NA	NA	NA	0	NA	NA	NA	other
4.456_384.3094	13.6687	0.2877	0.431	DOR:NOR	C18:pos	NA	C20 H40 N4 O3	384.309	4.456	NA	NA	NA	NA	NA	0	NA	NA	NA	other
4.46_136.0527	1.8277	0.2595	0.4138	DOR:NOR	C18:pos	Phenyl acetate	C8 H8 O2	136.053	4.46	C00548	BGI466	NA	-3e-04	-2.2546	19	null	null	null	other
4.519_191.095	501.98	0.1514	0.385	DOR:NOR	C18:pos	Nl8513000	C11 H13 N O2	191.095	4.519	NA	S12305	HMDB0001896	-3e-04	-1.7662	2	Organoheterocyclic compounds	Indoles and derivatives	Indoles	other
4.56_437.1439	736.944	0.356	0.4556	DOR:NOR	C18:pos	NA	C20 H27 N3 O4 S2	437.144	4.56	NA	NA	NA	NA	NA	0	NA	NA	NA	other
4.571_356.0529	65.0543	0.325	0.4414	DOR:NOR	C18:pos	(2e)-[4-(3,4-dihydroxyphenyl)-3-hydroxy-5-oxo-2(5h)-furanylidene](4-hydroxyphenyl)acetic acid	C18 H12 O8	356.053	4.571	NA	S30776773	HMDB0029460	3e-04	0.8101	3	Benzenoids	Phenols	Benzenediols	other
4.59_405.9952	80.7276	0.3254	0.4414	DOR:NOR	C18:pos	NA	C10 H13 N6 O4 P3 S	405.995	4.59	NA	NA	NA	NA	NA	0	NA	NA	NA	other
4.591_306.0705	83.2578	0.3259	0.4414	DOR:NOR	C18:pos	NA	C11 H18 N2 O4 S2	306.07	4.591	NA	NA	NA	NA	NA	0	NA	NA	NA	other
4.591_352.0759	1699.92	0.3589	0.4564	DOR:NOR	C18:pos	(12-methyl-7-tetraphenyl)methyl hydrogen sulfate	C20 H16 O4 S	352.076	4.591	C19562	S49327	HMDB0060420	0.0011	3.0419	1	Benzenoids	Phenanthrenes and derivatives	null	other
4.591_404.9871	180.288	0.3373	0.4471	DOR:NOR	C18:pos	NA	C6 H15 N O15 S2	404.987	4.591	NA	NA	NA	NA	NA	0	NA	NA	NA	other
4.591_407.9956	84.0636	0.3261	0.4414	DOR:NOR	C18:pos	NA	C8 H19 Cl N6 O P2 S3	407.996	4.591	NA	NA	NA	NA	NA	0	NA	NA	NA	other
4.592_360.9972	78.063	0.3273	0.4417	DOR:NOR	C18:pos	Acifluorfen	C14 H7 Cl F3 N O5	360.997	4.592	NA	S40113	HMDB0037112	-7e-04	-1.993	1	Benzenoids	Benzene and substituted derivatives	Diphenylethers	other
4.653_414.2461	1.0227	0.5404	0.6088	DOR:NOR	C18:pos	NA	C19 H34 N4 O6	414.246	4.653	NA	NA	NA	NA	NA	0	NA	NA	NA	other
4.654_431.2724	1.0797	0.5155	0.5873	DOR:NOR	C18:pos	NA	C19 H37 N5 O6	431.272	4.654	NA	NA	NA	NA	NA	0	NA	NA	NA	other
4.657_159.0355	51.2391	0.3855	0.4739	DOR:NOR	C18:pos	NA	C6 H9 N O2 S	159.036	4.657	NA	NA	NA	NA	NA	0	NA	NA	NA	other
4.667_197.1207	1.4333	0.1313	0.3602	DOR:NOR	C18:pos	3751	C14 H15 N	197.121	4.667	NA	S404399	HMDB0036173	-2e-04	-1.0149	1	Organoheterocyclic compounds	Pyridines and derivatives	null	other
4.669_165.0427	0.1048	0.0485	0.2154	DOR:NOR	C18:pos	Coixol	C8 H7 N O3	165.043	4.669	NA	S10317	HMDB0036582	-2e-04	-0.9372	6	Organoheterocyclic compounds	Benzoxazoles	Benzoxazolones	down
4.696_352.1086	44.5101	0.4441	0.522	DOR:NOR	C18:pos	2-{carboxy[(phenylacetyl)amino]methyl}-5,5-dimethyl-1,3-thiazolidine-4-carboxylic acid	C16 H20 N2 O5 S	352.109	4.696	NA	S89419	HMDB0060617	7e-04	1.9437	1	Organic acids and derivatives	Carboxylic acids and derivatives	Amino acids, peptides, and analogues	other
4.726_288.0937	142.063	0.3275	0.4417	DOR:NOR	C18:pos	Iprobenfos	C13 H21 O3 P S	288.094	4.726	NA	S30753	HMDB0031768	0.0013	4.3909	1	Benzenoids	Benzene and substituted derivatives	null	other
4.73_334.0982	43811.1	0.3852	0.4739	DOR:NOR	C18:pos	Penicillin g	C16 H18 N2 O4 S	334.098	4.73	C05551	M2743	NA	5e-04	1.5116	1	Organic acids and derivatives	Carboxylic acids and derivatives	Amino acids, peptides, and analogues	other
4.73_335.1008	41894.7	0.3674	0.4619	DOR:NOR	C18:pos	NA	C8 H21 N3 O9 S	335.101	4.73	NA	NA	NA	NA	NA	0	NA	NA	NA	other
4.731_465.0418	312.579	0.3379	0.4472	DOR:NOR	C18:pos	NA	C15 H20 N3 O8 P S2	465.042	4.731	NA	NA	NA	NA	NA	0	NA	NA	NA	other
4.741_515.2945	0.5795	0.988	0.988	DOR:NOR	C18:pos	NA	C22 H45 N O12	515.294	4.741	NA	NA	NA	NA	NA	0	NA	NA	NA	other
4.756_527.1942	130.941	0.3084	0.4385	DOR:NOR	C18:pos	NA	C15 H39 N5 O9 P2 S	527.194	4.756	NA	NA	NA	NA	NA	0	NA	NA	NA	other
4.767_214.1041	1.498	0.1856	0.3922	DOR:NOR	C18:pos	NA	NA	214.104	4.767	NA	NA	NA	NA	NA	0	NA	NA	NA	other
4.773_278.1622	75.6992	0.1875	0.3926	DOR:NOR	C18:pos	Ro 20-1724	C15 H22 N2 O3	278.162	4.773	NA	S4908	HMDB0062483	8e-04	2.8993	4	Benzenoids	Phenol ethers	Anisoles	other
4.785_110.0368	4.9379	0.2589	0.4136	DOR:NOR	C18:pos	Hydroquinone	C6 H6 O2	110.037	4.785	C00530	S764	HMDB0002434	-1e-04	-0.574	6	Benzenoids	Phenols	Benzenediols	other
4.785_172.0737	37.0306	0.3317	0.4436	DOR:NOR	C18:pos	Diethyl maleate	C8 H12 O4	172.074	4.785	NA	M2721	NA	-2e-04	-1.0024	6	NA	NA	NA	other
4.786_216.0999	90.6387	0.3219	0.4414	DOR:NOR	C18:pos	NA	C10 H16 O5	216.1	4.786	NA	NA	NA	NA	NA	0	NA	NA	NA	other
4.786_261.1574	29.0328	0.316	0.4412	DOR:NOR	C18:pos	3-hydroxy-3-[(3-methylbutanoyl)oxy]-4-(trimethylammonio)butanoate	C12 H23 N O5	261.157	4.786	NA	S35797888	HMDB0062555	2e-04	0.7515	1	Lipids and lipid-like molecules	Fatty Acyls	Fatty acid esters	other
4.791_141.1155	2.0466	0.2097	0.4006	DOR:NOR	C18:pos	Isopelletierine	C8 H15 N O	141.115	4.791	C06182	S21172044	HMDB0030325	-2e-04	-1.2496	6	Organoheterocyclic compounds	Piperidines	null	other
4.791_169.1104	1.9223	0.1996	0.396	DOR:NOR	C18:pos	Ethyl 1-methyl-1,2,5,6-tetrahydro-3-pyridinecarboxylate	C9 H15 N O2	169.11	4.791	NA	S31488	HMDB0038321	-1e-04	-0.7341	1	Alkaloids and derivatives	null	null	other
4.792_187.121	1.9671	0.1923	0.3953	DOR:NOR	C18:pos	8-amino-7-oxononanoic acid	C9 H17 N O3	187.121	4.792	NA	S168	NA	-2e-04	-0.875	2	NA	NA	NA	other
4.81_527.1942	199.22	0.3112	0.4403	DOR:NOR	C18:pos	NA	C21 H40 N O8 P3	527.194	4.81	NA	NA	NA	NA	NA	0	NA	NA	NA	other
4.829_214.1683	74.7647	0.2915	0.4319	DOR:NOR	C18:pos	NA	C11 H22 N2 O2	214.168	4.829	NA	NA	NA	NA	NA	0	NA	NA	NA	other
4.84_108.094	1.3525	0.0544	0.2262	DOR:NOR	C18:pos	(z)-1,3-octadiene	C8 H12	108.094	4.84	NA	S29321019	HMDB0061897	-1e-04	-1.2834	1	Hydrocarbons	Unsaturated hydrocarbons	Olefins	other
4.842_171.1261	1.2259	0.301	0.4372	DOR:NOR	C18:pos	Gabapentin	C9 H17 N O2	171.126	4.842	NA	S3328	HMDB0005015	-2e-04	-1.0731	1	Organic acids and derivatives	Carboxylic acids and derivatives	Amino acids, peptides, and analogues	other
4.842_458.2725	0.689	0.7487	0.7878	DOR:NOR	C18:pos	NA	C20 H42 O11	458.272	4.842	NA	NA	NA	NA	NA	0	NA	NA	NA	other
4.842_474.7858	65.3529	0.1659	0.3874	DOR:NOR	C18:pos	NA	NA	474.786	4.842	NA	NA	NA	NA	NA	0	NA	NA	NA	other
4.842_475.2992	0.685	0.7475	0.7872	DOR:NOR	C18:pos	Netilmicin	C21 H41 N5 O7	475.299	4.842	NA	S5256761	HMDB0015090	0.0014	2.8461	1	Organic oxygen compounds	Organooxygen compounds	Carbohydrates and carbohydrate conjugates	other
4.866_348.1139	48.1289	0.3054	0.4385	DOR:NOR	C18:pos	NA	C11 H21 N6 O3 P S	348.114	4.866	NA	NA	NA	NA	NA	0	NA	NA	NA	other
4.868_89.0478	2.4566	0.2302	0.4014	DOR:NOR	C18:pos	D-alanine	C3 H7 N O2	89.0478	4.868	00133?	BGI207	NA	-2e-04	-1.7935	6	NA	NA	NA	other
4.869_207.0898	229.062	0.4335	0.5121	DOR:NOR	C18:pos	N-acetyl-l-phenylalanine	C11 H13 N O3	207.09	4.869	C03519	S67404	HMDB0000512	-3e-04	-1.3713	5	Organic acids and derivatives	Carboxylic acids and derivatives	Amino acids, peptides, and analogues	other
4.869_252.1473	65.6244	0.3118	0.4405	DOR:NOR	C18:pos	5-allyl-5-sec-butyl-1,3-dimethyl-2,4,6(1h,3h,5h)-pyrimidinetrione	C13 H20 N2 O3	252.147	4.869	NA	S527603	HMDB0014451	1e-04	0.3563	2	Organoheterocyclic compounds	Diazines	Pyrimidines and pyrimidine derivatives	other
4.869_314.1295	49.4734	0.3046	0.4384	DOR:NOR	C18:pos	NA	C14 H22 N2 O4 S	314.13	4.869	NA	NA	NA	NA	NA	0	NA	NA	NA	other
4.916_559.3201	0.2028	0.5181	0.5894	DOR:NOR	C18:pos	NA	C25 H45 N5 O9	559.32	4.916	NA	NA	NA	NA	NA	0	NA	NA	NA	other
4.947_246.1004	0.7389	0.4388	0.5167	DOR:NOR	C18:pos	N-acetyl-d-tryptophan	C13 H14 N2 O3	246.1	4.947	NA	BGI415	NA	0	0.1718	5	NA	NA	NA	other
4.948_330.2072	1.4385	0.0749	0.2659	DOR:NOR	C18:pos	NA	NA	330.207	4.948	NA	NA	NA	NA	NA	0	NA	NA	NA	other
4.95_214.1205	0.4172	0.3086	0.4385	DOR:NOR	C18:pos	5-hexyl-2-oxotetrahydro-3-furancarboxylic acid	C11 H18 O4	214.12	4.95	NA	S8551389	HMDB0030984	0	-0.0793	3	Organoheterocyclic compounds	Lactones	Gamma butyrolactones	other
4.957_481.1344	901.005	0.3543	0.4541	DOR:NOR	C18:pos	NA	C19 H32 N O7 P S2	481.134	4.957	NA	NA	NA	NA	NA	0	NA	NA	NA	other
4.975_216.1198	1.0529	0.7676	0.8044	DOR:NOR	C18:pos	NA	NA	216.12	4.975	NA	NA	NA	NA	NA	0	NA	NA	NA	other
4.98_182.0944	0.17	0.189	0.3928	DOR:NOR	C18:pos	3815	C10 H14 O3	182.094	4.98	NA	S55496	HMDB0037641	-2e-04	-0.8497	10	Benzenoids	Phenols	Methoxyphenols	other
5.01_502.2991	0.6117	0.8259	0.8521	DOR:NOR	C18:pos	NA	C22 H46 O12	502.299	5.01	NA	NA	NA	NA	NA	0	NA	NA	NA	other
5.011_519.3261	0.6344	0.8077	0.837	DOR:NOR	C18:pos	NA	C27 H45 N5 O3 S	519.326	5.011	NA	NA	NA	NA	NA	0	NA	NA	NA	other
5.027_263.1315	0.0254	0.0561	0.2313	DOR:NOR	C18:pos	Girinimbine	C18 H17 N O	263.132	5.027	NA	S87534	HMDB0030241	-5e-04	-1.8164	3	Organoheterocyclic compounds	Indoles and derivatives	Carbazoles	other
5.029_188.1242	0.0397	0.0601	0.2384	DOR:NOR	C18:pos	NA	C10 H20 O S	188.124	5.029	NA	NA	NA	NA	NA	0	NA	NA	NA	other
5.043_185.1053	0.1378	0.1216	0.3473	DOR:NOR	C18:pos	(2r,3s)-3-hydroxy-8-methyl-8-azabicyclo[3.2.1]octane-2-carboxylic acid	C9 H15 N O3	185.105	5.043	C10858	S391305	HMDB0006548	-1e-04	-0.7522	6	Alkaloids and derivatives	Tropane alkaloids	null	other
5.043_452.3361	43.8754	0.2093	0.4006	DOR:NOR	C18:pos	NA	C24 H44 N4 O4	452.336	5.043	NA	NA	NA	NA	NA	0	NA	NA	NA	other
5.043_497.3942	30.7347	0.3478	0.4502	DOR:NOR	C18:pos	NA	C26 H51 N5 O4	497.394	5.043	NA	NA	NA	NA	NA	0	NA	NA	NA	other
5.073_219.0896	0.0244	0.0805	0.2773	DOR:NOR	C18:pos	Indomethacin related compound a	C12 H13 N O3	219.09	5.073	NA	S68635	HMDB0013988	-1e-04	-0.3104	4	Organoheterocyclic compounds	Indoles and derivatives	Indolyl carboxylic acids and derivatives	other
5.073_228.1197	0.0174	0.0518	0.2196	DOR:NOR	C18:pos	NA	NA	228.12	5.073	NA	NA	NA	NA	NA	0	NA	NA	NA	other
5.073_603.3467	0.2278	0.5435	0.6112	DOR:NOR	C18:pos	NA	C27 H49 N5 O10	603.347	5.073	NA	NA	NA	NA	NA	0	NA	NA	NA	other
5.075_196.0713	0.9764	0.8149	0.8432	DOR:NOR	C18:pos	NA	C6 H8 N6 O2	196.071	5.075	NA	NA	NA	NA	NA	0	NA	NA	NA	other
5.128_219.0567	43.1666	0.2922	0.4319	DOR:NOR	C18:pos	NA	C8 H13 N O4 S	219.057	5.128	NA	NA	NA	NA	NA	0	NA	NA	NA	other
5.141_140.084	0.3961	0.2338	0.4037	DOR:NOR	C18:pos	2459	C8 H12 O2	140.084	5.141	NA	S1267058	HMDB0040463	-2e-04	-1.6982	13	Lipids and lipid-like molecules	Fatty Acyls	Fatty acid esters	other
5.141_212.1025	0.1464	0.1605	0.3863	DOR:NOR	C18:pos	NA	C7 H12 N6 O2	212.102	5.141	NA	NA	NA	NA	NA	0	NA	NA	NA	other
5.142_94.0784	0.3672	0.2232	0.4006	DOR:NOR	C18:pos	1,3,5-heptatriene	C7 H10	94.0784	5.142	NA	S4518902	HMDB0061889	-1e-04	-1.0945	3	Hydrocarbons	Unsaturated hydrocarbons	Olefins	other
5.143_180.0763	0.225	0.2164	0.4006	DOR:NOR	C18:pos	NA	C6 H8 N6 O	180.076	5.143	NA	NA	NA	NA	NA	0	NA	NA	NA	other
5.145_471.1501	172.254	0.3233	0.4414	DOR:NOR	C18:pos	10-formyldihydrofolic acid	C20 H21 N7 O7	471.15	5.145	NA	S147665	HMDB0006485	1e-04	0.2876	2	Organoheterocyclic compounds	Pteridines and derivatives	Pterins and derivatives	other
5.162_546.3252	0.6011	0.8375	0.8622	DOR:NOR	C18:pos	NA	C24 H50 O13	546.325	5.162	NA	NA	NA	NA	NA	0	NA	NA	NA	other
5.163_563.3527	0.6936	0.751	0.7898	DOR:NOR	C18:pos	NA	NA	563.353	5.163	NA	NA	NA	NA	NA	0	NA	NA	NA	other
5.183_332.0829	250.788	0.3259	0.4414	DOR:NOR	C18:pos	NA	C10 H17 N6 O3 P S	332.083	5.183	NA	NA	NA	NA	NA	0	NA	NA	NA	other
5.191_203.0982	45.0648	0.2861	0.431	DOR:NOR	C18:pos	NA	C9 H17 N O2 S	203.098	5.191	NA	NA	NA	NA	NA	0	NA	NA	NA	other
5.196_367.1198	52.8028	0.2892	0.4312	DOR:NOR	C18:pos	NA	C16 H23 N3 O3 P2	367.12	5.196	NA	NA	NA	NA	NA	0	NA	NA	NA	other
5.212_647.3718	0.1661	0.4861	0.5595	DOR:NOR	C18:pos	NA	C39 H54 N O5 P	647.372	5.212	NA	NA	NA	NA	NA	0	NA	NA	NA	other
5.25_177.0953	0.1028	0.0301	0.171	DOR:NOR	C18:pos	NA	NA	177.095	5.25	NA	NA	NA	NA	NA	0	NA	NA	NA	down
5.251_179.1189	0.0841	0.0391	0.1909	DOR:NOR	C18:pos	NA	C6 H18 N3 O P	179.119	5.251	NA	NA	NA	NA	NA	0	NA	NA	NA	down
5.253_368.1036	93.053	0.3015	0.4372	DOR:NOR	C18:pos	NA	C18 H27 P3 S	368.104	5.253	NA	NA	NA	NA	NA	0	NA	NA	NA	other
5.273_685.2215	85.3866	0.3043	0.4383	DOR:NOR	C18:pos	NA	C34 H46 N3 O2 P3 S2	685.221	5.273	NA	NA	NA	NA	NA	0	NA	NA	NA	other
5.274_379.1562	139.848	0.3131	0.4406	DOR:NOR	C18:pos	NA	C18 H25 N3 O4 S	379.156	5.274	NA	NA	NA	NA	NA	0	NA	NA	NA	other
5.274_393.1717	43.586	0.293	0.4324	DOR:NOR	C18:pos	NA	C19 H29 N3 O2 P2	393.172	5.274	NA	NA	NA	NA	NA	0	NA	NA	NA	other
5.274_690.1772	1581.93	0.2142	0.4006	DOR:NOR	C18:pos	NA	C32 H40 N2 O7 P2 S2	690.177	5.274	NA	NA	NA	NA	NA	0	NA	NA	NA	other
5.275_113.0299	810.478	0.3387	0.4473	DOR:NOR	C18:pos	Xj4375000	C5 H7 N S	113.03	5.275	NA	S10470	HMDB0032974	0	-0.1553	6	Organoheterocyclic compounds	Azoles	Thiazoles	other
5.275_159.0355	5116.21	0.3792	0.4718	DOR:NOR	C18:pos	NA	C6 H9 N O2 S	159.036	5.275	NA	NA	NA	NA	NA	0	NA	NA	NA	other
5.275_175.0636	973.881	0.42	0.4996	DOR:NOR	C18:pos	Indole-3-acetic acid	C10 H9 N O2	175.064	5.275	C00954	M445	NA	-3e-04	-1.5532	4	Organoheterocyclic compounds	Indoles and derivatives	Indolyl carboxylic acids and derivatives	other
5.275_336.0937	95.7508	0.308	0.4385	DOR:NOR	C18:pos	NA	C17 H21 O3 P S	336.094	5.275	NA	NA	NA	NA	NA	0	NA	NA	NA	other
5.275_437.0464	212.923	0.3197	0.4412	DOR:NOR	C18:pos	NA	C9 H22 N5 O7 P3 S	437.046	5.275	NA	NA	NA	NA	NA	0	NA	NA	NA	other
5.275_451.0623	67.4458	0.2994	0.4372	DOR:NOR	C18:pos	NA	C17 H17 N5 O6 S2	451.062	5.275	NA	NA	NA	NA	NA	0	NA	NA	NA	other
5.276_275.1189	0.0356	0.0812	0.2793	DOR:NOR	C18:pos	NA	C12 H21 N O4 S	275.119	5.276	NA	NA	NA	NA	NA	0	NA	NA	NA	other
5.276_289.1009	189.747	0.318	0.4412	DOR:NOR	C18:pos	2-amino-7,8-dihydroxy-6-(1,2,3-trihydroxypropyl)-5,6,7,8-tetrahydro-4(1h)-pteridinone	C9 H15 N5 O6	289.101	5.276	NA	S24	HMDB0012144	0.0013	4.586	1	Organoheterocyclic compounds	Pteridines and derivatives	Pterins and derivatives	other
5.276_306.1034	169.455	0.3171	0.4412	DOR:NOR	C18:pos	Fluconazole	C13 H12 F2 N6 O	306.103	5.276	NA	S3248	HMDB0014342	6e-04	2.0769	1	Benzenoids	Benzene and substituted derivatives	Halobenzenes	other
5.277_90.0465	59.4351	0.2958	0.4346	DOR:NOR	C18:pos	NA	NA	90.0465	5.277	NA	NA	NA	NA	NA	0	NA	NA	NA	other
5.28_276.0929	273.33	0.3238	0.4414	DOR:NOR	C18:pos	NA	C14 H16 N2 O2 S	276.093	5.28	NA	NA	NA	NA	NA	0	NA	NA	NA	other
5.298_590.3514	0.4203	0.9217	0.9341	DOR:NOR	C18:pos	NA	C22 H50 N6 O12	590.351	5.298	NA	NA	NA	NA	NA	0	NA	NA	NA	other
5.334_348.1141	333.736	0.3183	0.4412	DOR:NOR	C18:pos	NA	C17 H20 N2 O4 S	348.114	5.334	NA	NA	NA	NA	NA	0	NA	NA	NA	other
5.341_691.3973	0.1784	0.4873	0.5598	DOR:NOR	C18:pos	NA	C30 H61 N O16	691.397	5.341	NA	NA	NA	NA	NA	0	NA	NA	NA	other
5.348_465.1393	1075.93	0.3339	0.4453	DOR:NOR	C18:pos	NA	C21 H27 N3 O5 S2	465.139	5.348	NA	NA	NA	NA	NA	0	NA	NA	NA	other
5.349_182.1423	17.6179	0.1609	0.3863	DOR:NOR	C18:pos	NA	C10 H18 N2 O	182.142	5.349	NA	NA	NA	NA	NA	0	NA	NA	NA	other
5.37_290.1089	591.389	0.3945	0.4811	DOR:NOR	C18:pos	NA	C15 H18 N2 O2 S	290.109	5.37	NA	NA	NA	NA	NA	0	NA	NA	NA	other
5.376_324.1141	115.907	0.289	0.4312	DOR:NOR	C18:pos	Acetohexamide	C15 H20 N2 O4 S	324.114	5.376	NA	S1912	HMDB0014558	3e-04	0.8687	1	Organic oxygen compounds	Organooxygen compounds	Carbonyl compounds	other
5.386_350.0935	239.629	0.3166	0.4412	DOR:NOR	C18:pos	Phenoxymethylpenicillin	C16 H18 N2 O5 S	350.094	5.386	NA	S6607	HMDB0014561	2e-04	0.4745	1	Organic acids and derivatives	Carboxylic acids and derivatives	Amino acids, peptides, and analogues	other
5.395_368.1893	116.439	0.3058	0.4385	DOR:NOR	C18:pos	NA	C17 H30 N4 O P2	368.189	5.395	NA	NA	NA	NA	NA	0	NA	NA	NA	other
5.404_327.252	102.665	0.3747	0.469	DOR:NOR	C18:pos	NA	C17 H33 N3 O3	327.252	5.404	NA	NA	NA	NA	NA	0	NA	NA	NA	other
5.422_634.3766	0.4078	0.889	0.9076	DOR:NOR	C18:pos	NA	C31 H61 N2 O5 P3	634.377	5.422	NA	NA	NA	NA	NA	0	NA	NA	NA	other
5.43_228.1362	0.0375	0.1781	0.3915	DOR:NOR	C18:pos	Traumatic acid	C12 H20 O4	228.136	5.43	C16308	S4446155	HMDB0000933	0	-0.0128	2	Lipids and lipid-like molecules	Fatty Acyls	Fatty acids and conjugates	other
5.456_610.477	62.6373	0.3012	0.4372	DOR:NOR	C18:pos	NA	C31 H66 N2 O9	610.477	5.456	NA	NA	NA	NA	NA	0	NA	NA	NA	other
5.457_565.4202	82.5884	0.1945	0.396	DOR:NOR	C18:pos	NA	C28 H60 N3 O6 P	565.42	5.457	NA	NA	NA	NA	NA	0	NA	NA	NA	other
5.47_150.0683	5.9019	0.4793	0.5542	DOR:NOR	C18:pos	4'-methoxyacetophenone	C9 H10 O2	150.068	5.47	null	M6574	HMDB0032570	-2e-04	-1.5716	32	Benzenoids	Benzene and substituted derivatives	Acetophenones	other
5.474_126.1046	0.4077	0.6154	0.6734	DOR:NOR	C18:pos	2707	C8 H14 O	126.105	5.474	NA	S9478	HMDB0035915	-2e-04	-1.3006	22	Organic oxygen compounds	Organooxygen compounds	Carbonyl compounds	other
5.474_166.0971	0.2446	0.8175	0.8449	DOR:NOR	C18:pos	Cyromazine	C6 H10 N6	166.097	5.474	C14147	M2872	NA	-5e-04	-2.7705	1	Organoheterocyclic compounds	Triazines	Aminotriazines	other
5.508_191.0584	0.3355	0.5725	0.6382	DOR:NOR	C18:pos	5-hydroxyindoleacetate	C10 H9 N O3	191.058	5.508	C05635	BGI131	NA	-2e-04	-1.0463	3	Organoheterocyclic compounds	Indoles and derivatives	Indolyl carboxylic acids and derivatives	other
5.508_382.0998	152.452	0.2919	0.4319	DOR:NOR	C18:pos	NA	C21 H14 N6 S	382.1	5.508	NA	NA	NA	NA	NA	0	NA	NA	NA	other
5.508_465.0419	116.493	0.2865	0.431	DOR:NOR	C18:pos	NA	C16 H21 N O9 P2 S	465.042	5.508	NA	NA	NA	NA	NA	0	NA	NA	NA	other
5.508_479.0204	45.4825	0.2639	0.4166	DOR:NOR	C18:pos	NA	NA	479.02	5.508	NA	NA	NA	NA	NA	0	NA	NA	NA	other
5.509_380.104	1769.36	0.3262	0.4414	DOR:NOR	C18:pos	Meticillin	C17 H20 N2 O6 S	380.104	5.509	NA	S5862	HMDB0015541	2e-04	0.4533	1	Organic acids and derivatives	Carboxylic acids and derivatives	Amino acids, peptides, and analogues	other
5.532_695.4286	0.5921	0.9233	0.9345	DOR:NOR	C18:pos	NA	C31 H61 N5 O12	695.429	5.532	NA	NA	NA	NA	NA	0	NA	NA	NA	other
5.534_308.1191	16414.1	0.3455	0.4502	DOR:NOR	C18:pos	NA	C15 H20 N2 O3 S	308.119	5.534	NA	NA	NA	NA	NA	0	NA	NA	NA	other
5.535_445.3292	0.0388	0.0053	0.0719	DOR:NOR	C18:pos	NA	C26 H43 N3 O3	445.329	5.535	NA	NA	NA	NA	NA	0	NA	NA	NA	down
5.559_244.1309	1.2402	0.8243	0.8509	DOR:NOR	C18:pos	6-hydroxy-5-methyl-4,11-dioxoundecanoic acid	C12 H20 O5	244.131	5.559	NA	S21258154	HMDB0032472	1e-04	0.5551	1	Lipids and lipid-like molecules	Fatty Acyls	Fatty acids and conjugates	other
5.56_389.7252	0.3048	0.5872	0.6496	DOR:NOR	C18:pos	NA	NA	389.725	5.56	NA	NA	NA	NA	NA	0	NA	NA	NA	other
5.568_164.0839	0.0887	0.2623	0.4155	DOR:NOR	C18:pos	Eugenol	C10 H12 O2	164.084	5.568	C10453	S13876103	HMDB0005809	-2e-04	-1.0338	49	Benzenoids	Phenols	Methoxyphenols	other
5.572_182.0945	0.125	0.2793	0.427	DOR:NOR	C18:pos	3815	C10 H14 O3	182.095	5.572	NA	S55496	HMDB0037641	-2e-04	-1.1508	10	Benzenoids	Phenols	Methoxyphenols	other
5.573_437.0468	479.173	0.3075	0.4385	DOR:NOR	C18:pos	NA	C16 H17 N5 O4 P2 S	437.047	5.573	NA	NA	NA	NA	NA	0	NA	NA	NA	other
5.574_217.2043	4.0863	0.3194	0.4412	DOR:NOR	C18:pos	NA	C12 H27 N O2	217.204	5.574	NA	NA	NA	NA	NA	0	NA	NA	NA	other
5.575_352.1089	13104.7	0.4124	0.4965	DOR:NOR	C18:pos	2-{carboxy[(phenylacetyl)amino]methyl}-5,5-dimethyl-1,3-thiazolidine-4-carboxylic acid	C16 H20 N2 O5 S	352.109	5.575	NA	S89419	HMDB0060617	4e-04	1.0778	1	Organic acids and derivatives	Carboxylic acids and derivatives	Amino acids, peptides, and analogues	other
5.585_176.0944	97.9724	0.2737	0.4226	DOR:NOR	C18:pos	Serotonin	C10 H12 N2 O	176.094	5.585	C00780	S5013	HMDB0000259	5e-04	3.1066	2	Organoheterocyclic compounds	Indoles and derivatives	Tryptamines and derivatives	other
5.587_90.0465	800.632	0.3102	0.4397	DOR:NOR	C18:pos	NA	NA	90.0465	5.587	NA	NA	NA	NA	NA	0	NA	NA	NA	other
5.591_262.1136	191.721	0.2875	0.431	DOR:NOR	C18:pos	NA	C14 H18 N2 O S	262.114	5.591	NA	NA	NA	NA	NA	0	NA	NA	NA	other
5.597_127.0456	523.081	0.304	0.4381	DOR:NOR	C18:pos	3325	C6 H9 N S	127.046	5.597	NA	S55558	HMDB0033155	0	0.163	8	Organoheterocyclic compounds	Azoles	Thiazoles	other
5.606_638.2192	965.088	0.3206	0.4412	DOR:NOR	C18:pos	NA	C25 H45 N4 O7 P3 S	638.219	5.606	NA	NA	NA	NA	NA	0	NA	NA	NA	other
5.608_713.1376	46.022	0.2651	0.4172	DOR:NOR	C18:pos	NA	NA	713.138	5.608	NA	NA	NA	NA	NA	0	NA	NA	NA	other
5.61_308.1191	13332.6	0.3821	0.4729	DOR:NOR	C18:pos	NA	C15 H20 N2 O3 S	308.119	5.61	NA	NA	NA	NA	NA	0	NA	NA	NA	other
5.619_445.3292	0.0922	0.049	0.2163	DOR:NOR	C18:pos	NA	C26 H43 N3 O3	445.329	5.619	NA	NA	NA	NA	NA	0	NA	NA	NA	down
5.623_228.1362	0.121	0.2602	0.4138	DOR:NOR	C18:pos	Traumatic acid	C12 H20 O4	228.136	5.623	C16308	S4446155	HMDB0000933	0	-0.0193	2	Lipids and lipid-like molecules	Fatty Acyls	Fatty acids and conjugates	other
5.623_300.1542	0.3498	0.5613	0.6279	DOR:NOR	C18:pos	NA	C11 H20 N6 O4	300.154	5.623	NA	NA	NA	NA	NA	0	NA	NA	NA	other
5.632_268.1284	0.4137	0.4776	0.5529	DOR:NOR	C18:pos	NA	C10 H16 N6 O3	268.128	5.632	NA	NA	NA	NA	NA	0	NA	NA	NA	other
5.633_173.051	1023.89	0.3215	0.4414	DOR:NOR	C18:pos	NA	C7 H11 N O2 S	173.051	5.633	NA	NA	NA	NA	NA	0	NA	NA	NA	other
5.64_682.2079	170.969	0.2837	0.4298	DOR:NOR	C18:pos	NA	C31 H34 N6 O10 S	682.208	5.64	NA	NA	NA	NA	NA	0	NA	NA	NA	other
5.651_216.0567	254.7	0.2929	0.4324	DOR:NOR	C18:pos	6-apa	C8 H12 N2 O3 S	216.057	5.651	C02954	S10611	HMDB0060618	2e-04	0.9826	2	Organic acids and derivatives	Carboxylic acids and derivatives	Amino acids, peptides, and analogues	other
5.654_660.2274	1980.86	0.3199	0.4412	DOR:NOR	C18:pos	NA	C33 H37 N6 O5 P S	660.227	5.654	NA	NA	NA	NA	NA	0	NA	NA	NA	other
5.656_437.0468	501.371	0.3017	0.4372	DOR:NOR	C18:pos	NA	C16 H17 N5 O4 P2 S	437.047	5.656	NA	NA	NA	NA	NA	0	NA	NA	NA	other
5.656_90.0449	304.642	0.2935	0.4326	DOR:NOR	C18:pos	NA	NA	90.0449	5.656	NA	NA	NA	NA	NA	0	NA	NA	NA	other
5.657_113.0299	1368.13	0.3161	0.4412	DOR:NOR	C18:pos	Xj4375000	C5 H7 N S	113.03	5.657	NA	S10470	HMDB0032974	0	-0.1553	6	Organoheterocyclic compounds	Azoles	Thiazoles	other
5.657_159.0355	3079.8	0.3581	0.4564	DOR:NOR	C18:pos	NA	C6 H9 N O2 S	159.036	5.657	NA	NA	NA	NA	NA	0	NA	NA	NA	other
5.657_352.1089	14141.8	0.3845	0.4739	DOR:NOR	C18:pos	2-{carboxy[(phenylacetyl)amino]methyl}-5,5-dimethyl-1,3-thiazolidine-4-carboxylic acid	C16 H20 N2 O5 S	352.109	5.657	NA	S89419	HMDB0060617	4e-04	1.1234	1	Organic acids and derivatives	Carboxylic acids and derivatives	Amino acids, peptides, and analogues	other
5.657_353.1115	18025.4	0.4165	0.4978	DOR:NOR	C18:pos	Methyl (2r)-3-[(s)-cyano(phenyl)methoxy]-2-hydroxy-3-{[(2s)-3-hydroxy-1-methoxy-1-oxo-2-propanyl]oxy}propanoate	C16 H19 N O8	353.111	5.657	NA	S59693833	NA	-4e-04	-1.2596	2	NA	NA	NA	other
5.658_732.2107	218.131	0.2892	0.4312	DOR:NOR	C18:pos	NA	C27 H46 N2 O15 P2 S	732.211	5.658	NA	NA	NA	NA	NA	0	NA	NA	NA	other
5.659_757.1269	353.27	0.2779	0.4259	DOR:NOR	C18:pos	NA	C40 H30 N3 O7 P3	757.127	5.659	NA	NA	NA	NA	NA	0	NA	NA	NA	other
5.66_726.1984	775.231	0.2401	0.4048	DOR:NOR	C18:pos	NA	C22 H45 N6 O13 P3 S	726.198	5.66	NA	NA	NA	NA	NA	0	NA	NA	NA	other
5.663_172.1101	0.4631	0.5292	0.5994	DOR:NOR	C18:pos	Oi1695000	C9 H16 O3	172.11	5.663	NA	S15496	HMDB0040165	-2e-04	-0.8946	10	Organic acids and derivatives	Keto acids and derivatives	Gamma-keto acids and derivatives	other
5.663_212.1025	0.2484	0.5359	0.6047	DOR:NOR	C18:pos	NA	C7 H12 N6 O2	212.102	5.663	NA	NA	NA	NA	NA	0	NA	NA	NA	other
5.664_112.089	0.4197	0.3949	0.4811	DOR:NOR	C18:pos	3165	C7 H12 O	112.089	5.664	NA	S4446437	HMDB0033827	-2e-04	-1.869	13	Organic oxygen compounds	Organooxygen compounds	Carbonyl compounds	other
5.676_106.063	3.2101	0.0386	0.1909	DOR:NOR	C18:pos	Mfcd00059662	C4 H10 O3	106.063	5.676	NA	S19304	HMDB0034778	0	-0.4354	1	Organic oxygen compounds	Organooxygen compounds	Alcohols and polyols	up
5.679_162.0316	17.7486	0.2749	0.4236	DOR:NOR	C18:pos	7-hydroxycoumarine	C9 H6 O3	162.032	5.679	C09315	M1341	NA	1e-04	0.6576	6	Phenylpropanoids and polyketides	Coumarins and derivatives	Hydroxycoumarins	other
5.679_236.0684	167.742	0.2105	0.4006	DOR:NOR	C18:pos	7,8-dihydroxy-3,7-dimethyl-6-oxo-7,8-dihydro-6h-isochromene-5-carbaldehyde	C12 H12 O5	236.068	5.679	NA	S2759545	HMDB0030858	1e-04	0.252	6	Organoheterocyclic compounds	Azaphilones	null	other
5.679_268.0945	107.107	0.1636	0.3874	DOR:NOR	C18:pos	NA	C13 H16 O6	268.094	5.679	NA	NA	NA	NA	NA	0	NA	NA	NA	other
5.68_306.1034	682.758	0.3018	0.4372	DOR:NOR	C18:pos	Fluconazole	C13 H12 F2 N6 O	306.103	5.68	NA	S3248	HMDB0014342	7e-04	2.1378	1	Benzenoids	Benzene and substituted derivatives	Halobenzenes	other
5.682_162.1257	13.2675	0.0385	0.1909	DOR:NOR	C18:pos	1,3,7-octanetriol	C8 H18 O3	162.126	5.682	NA	S35013644	HMDB0033625	-1e-04	-0.5795	1	Lipids and lipid-like molecules	Fatty Acyls	Fatty alcohols	up
5.695_261.2302	2.4602	0.267	0.4186	DOR:NOR	C18:pos	NA	C14 H31 N O3	261.23	5.695	NA	NA	NA	NA	NA	0	NA	NA	NA	other
5.7_324.1141	151.033	0.2734	0.4226	DOR:NOR	C18:pos	Acetohexamide	C15 H20 N2 O4 S	324.114	5.7	NA	S1912	HMDB0014558	3e-04	0.9834	1	Organic oxygen compounds	Organooxygen compounds	Carbonyl compounds	other
5.702_173.1781	3.9944	0.2047	0.4002	DOR:NOR	C18:pos	NA	C10 H23 N O	173.178	5.702	NA	NA	NA	NA	NA	0	NA	NA	NA	other
5.724_509.1294	457.654	0.3856	0.4739	DOR:NOR	C18:pos	NA	C24 H34 N O P3 S2	509.129	5.724	NA	NA	NA	NA	NA	0	NA	NA	NA	other
5.73_391.7408	0.3062	0.7488	0.7878	DOR:NOR	C18:pos	NA	NA	391.741	5.73	NA	NA	NA	NA	NA	0	NA	NA	NA	other
5.767_440.336	71.4498	0.2789	0.4268	DOR:NOR	C18:pos	NA	C23 H44 N4 O4	440.336	5.767	NA	NA	NA	NA	NA	0	NA	NA	NA	other
5.779_136.089	0.1621	0.1508	0.385	DOR:NOR	C18:pos	4329	C9 H12 O	136.089	5.779	NA	S10248	HMDB0032544	-2e-04	-1.1376	22	Benzenoids	Benzene and substituted derivatives	Phenols and derivatives	other
5.779_350.2426	63.1333	0.1854	0.3922	DOR:NOR	C18:pos	NA	C17 H30 N6 O2	350.243	5.779	NA	NA	NA	NA	NA	0	NA	NA	NA	other
5.78_212.1025	0.0324	0.1633	0.3874	DOR:NOR	C18:pos	NA	C7 H12 N6 O2	212.102	5.78	NA	NA	NA	NA	NA	0	NA	NA	NA	other
5.78_94.0784	0.3037	0.2478	0.4068	DOR:NOR	C18:pos	1,3,5-heptatriene	C7 H10	94.0784	5.78	NA	S4518902	HMDB0061889	-1e-04	-1.2365	3	Hydrocarbons	Unsaturated hydrocarbons	Olefins	other
5.783_678.5022	215.815	0.1657	0.3874	DOR:NOR	C18:pos	NA	C36 H66 N6 O6	678.502	5.783	NA	NA	NA	NA	NA	0	NA	NA	NA	other
5.786_202.0743	161.987	0.291	0.4319	DOR:NOR	C18:pos	Vasicinone	C11 H10 N2 O2	202.074	5.786	C10744	M5842	NA	0	-0.1699	0	null	null	null	other
5.789_216.0899	66.3281	0.2734	0.4226	DOR:NOR	C18:pos	1,2,3,4-tetrahydro-beta-carboline-3-carboxylic acid	C12 H12 N2 O2	216.09	5.789	NA	S88749	HMDB0035665	-1e-04	-0.2921	1	Organoheterocyclic compounds	Indoles and derivatives	Pyridoindoles	other
5.803_188.0303	2.1616	0.2238	0.4006	DOR:NOR	C18:pos	NA	C3 H4 N6 O4	188.03	5.803	NA	NA	NA	NA	NA	0	NA	NA	NA	other
5.804_152.0839	0.9713	0.843	0.8675	DOR:NOR	C18:pos	2128	C9 H12 O2	152.084	5.804	NA	S56163	HMDB0041326	-2e-04	-1.4164	13	Benzenoids	Benzene and substituted derivatives	Benzylethers	other
5.806_148.0377	2.2667	0.2499	0.4074	DOR:NOR	C18:pos	(+/-)-2-hydroxyglutaric acid	C5 H8 O5	148.038	5.806	C02630	S42	HMDB0059655	-5e-04	-3.4165	8	Organic acids and derivatives	Hydroxy acids and derivatives	Short-chain hydroxy acids and derivatives	other
5.811_124.089	1.3443	0.7283	0.7722	DOR:NOR	C18:pos	3721	C8 H12 O	124.089	5.811	NA	S4446450	HMDB0031686	-2e-04	-1.4925	10	Organic oxygen compounds	Organooxygen compounds	Carbonyl compounds	other
5.812_202.1207	1.379	0.6721	0.7235	DOR:NOR	C18:pos	Sebacic acid	C10 H18 O4	202.121	5.812	NA	S5004	HMDB0000792	-2e-04	-1.0444	7	Lipids and lipid-like molecules	Fatty Acyls	Fatty acids and conjugates	other
5.812_216.1362	1.3824	0.7515	0.79	DOR:NOR	C18:pos	1780537	C11 H20 O4	216.136	5.812	NA	S15037	HMDB0000888	-1e-04	-0.2785	2	Lipids and lipid-like molecules	Fatty Acyls	Fatty acids and conjugates	other
5.849_196.1076	0.0407	0.2869	0.431	DOR:NOR	C18:pos	NA	C7 H12 N6 O	196.108	5.849	NA	NA	NA	NA	NA	0	NA	NA	NA	other
5.85_138.1046	0.2067	0.2551	0.4113	DOR:NOR	C18:pos	Isophorone	C9 H14 O	138.105	5.85	C14743	M774	NA	-2e-04	-1.251	13	Organooxygen compounds	Carbonyl compounds	Ketones	other
5.856_282.1462	0.0368	0.273	0.4226	DOR:NOR	C18:pos	Artemisinin	C15 H22 O5	282.146	5.856	C09538	M6160	NA	5e-04	1.7616	9	null	null	null	other
5.861_246.2022	0.5191	0.4869	0.5598	DOR:NOR	C18:pos	NA	C14 H30 O S	246.202	5.861	NA	NA	NA	NA	NA	0	NA	NA	NA	other
5.891_108.094	0.2666	0.169	0.389	DOR:NOR	C18:pos	(z)-1,3-octadiene	C8 H12	108.094	5.891	NA	S29321019	HMDB0061897	-1e-04	-0.8675	1	Hydrocarbons	Unsaturated hydrocarbons	Olefins	other
5.891_136.089	0.3413	0.1826	0.3915	DOR:NOR	C18:pos	4329	C9 H12 O	136.089	5.891	NA	S10248	HMDB0032544	-2e-04	-1.1376	22	Benzenoids	Benzene and substituted derivatives	Phenols and derivatives	other
5.891_171.1261	0.1822	0.143	0.3734	DOR:NOR	C18:pos	Gabapentin	C9 H17 N O2	171.126	5.891	NA	S3328	HMDB0005015	-2e-04	-0.901	1	Organic acids and derivatives	Carboxylic acids and derivatives	Amino acids, peptides, and analogues	other
5.891_172.1101	0.2267	0.1645	0.3874	DOR:NOR	C18:pos	Oi1695000	C9 H16 O3	172.11	5.891	NA	S15496	HMDB0040165	-1e-04	-0.7691	10	Organic acids and derivatives	Keto acids and derivatives	Gamma-keto acids and derivatives	other
5.891_186.1258	0.2264	0.1658	0.3874	DOR:NOR	C18:pos	1,3,3-trimethyl-2-oxabicyclo[2.2.2]octane-6,7-diol	C10 H18 O3	186.126	5.891	NA	S102967	HMDB0041376	-2e-04	-0.8261	13	Organoheterocyclic compounds	Oxanes	null	other
5.891_257.0473	0.1809	0.1765	0.3915	DOR:NOR	C18:pos	NA	NA	257.047	5.891	NA	NA	NA	NA	NA	0	NA	NA	NA	other
5.892_226.1182	0.1476	0.1572	0.3863	DOR:NOR	C18:pos	NA	C8 H14 N6 O2	226.118	5.892	NA	NA	NA	NA	NA	0	NA	NA	NA	other
5.919_320.0829	51.5588	0.2761	0.4242	DOR:NOR	C18:pos	NA	C15 H16 N2 O4 S	320.083	5.919	NA	NA	NA	NA	NA	0	NA	NA	NA	other
5.935_499.1451	226.59	0.3014	0.4372	DOR:NOR	C18:pos	NA	C23 H26 N5 O4 P S	499.145	5.935	NA	NA	NA	NA	NA	0	NA	NA	NA	other
5.943_188.084	6.7387	0.6465	0.7004	DOR:NOR	C18:pos	(e)-3-butylidenephthalide	C12 H12 O2	188.084	5.943	NA	S4509715	HMDB0032061	-3e-04	-1.6321	5	Organoheterocyclic compounds	Isocoumarans	Isobenzofuranones	other
5.966_250.1178	0.0764	0.3472	0.4502	DOR:NOR	C18:pos	NA	C10 H14 N6 O2	250.118	5.966	NA	NA	NA	NA	NA	0	NA	NA	NA	other
5.969_527.1404	77.7504	0.286	0.431	DOR:NOR	C18:pos	NA	C20 H34 N O9 P S2	527.14	5.969	NA	NA	NA	NA	NA	0	NA	NA	NA	other
5.993_324.1141	496.825	0.3159	0.4412	DOR:NOR	C18:pos	Acetohexamide	C15 H20 N2 O4 S	324.114	5.993	NA	S1912	HMDB0014558	2e-04	0.7225	1	Organic oxygen compounds	Organooxygen compounds	Carbonyl compounds	other
6.005_194.0921	0.1143	0.1955	0.396	DOR:NOR	C18:pos	NA	C7 H10 N6 O	194.092	6.005	NA	NA	NA	NA	NA	0	NA	NA	NA	other
6.026_168.0763	0.1189	0.2245	0.4006	DOR:NOR	C18:pos	NA	C5 H8 N6 O	168.076	6.026	NA	NA	NA	NA	NA	0	NA	NA	NA	other
6.072_294.1687	0.034	0.2485	0.4068	DOR:NOR	C18:pos	NA	C14 H22 N4 O3	294.169	6.072	NA	NA	NA	NA	NA	0	NA	NA	NA	other
6.082_208.1101	0.0989	0.2113	0.4006	DOR:NOR	C18:pos	Asarone	C12 H16 O3	208.11	6.082	NA	S552532	HMDB0031469	-2e-04	-0.9598	20	Benzenoids	Benzene and substituted derivatives	Phenols and derivatives	other
6.096_240.1361	0.1451	0.2247	0.4006	DOR:NOR	C18:pos	NA	C13 H20 O4	240.136	6.096	NA	NA	NA	NA	NA	0	NA	NA	NA	other
6.1_206.092	0.1012	0.182	0.3915	DOR:NOR	C18:pos	NA	C8 H10 N6 O	206.092	6.1	NA	NA	NA	NA	NA	0	NA	NA	NA	other
6.11_159.0355	154.612	0.3294	0.443	DOR:NOR	C18:pos	NA	C6 H9 N O2 S	159.036	6.11	NA	NA	NA	NA	NA	0	NA	NA	NA	other
6.127_194.0921	0.1501	0.1614	0.3863	DOR:NOR	C18:pos	NA	C7 H10 N6 O	194.092	6.127	NA	NA	NA	NA	NA	0	NA	NA	NA	other
6.133_289.1344	0.0296	0.0348	0.1825	DOR:NOR	C18:pos	Chloropyramine	C16 H20 Cl N3	289.134	6.133	NA	S23628	HMDB0015690	2e-04	0.5759	1	Benzenoids	Benzene and substituted derivatives	Benzylamines	down
6.144_404.1511	53.9439	0.2853	0.4306	DOR:NOR	C18:pos	NA	C19 H26 N4 O2 P2	404.151	6.144	NA	NA	NA	NA	NA	0	NA	NA	NA	other
6.145_138.0319	8.6958	0.4666	0.5429	DOR:NOR	C18:pos	Salicylate	C7 H6 O3	138.032	6.145	C00805	BGI509	NA	-2e-04	-1.2184	9	Benzenoids	Benzene and substituted derivatives	Benzoic acids and derivatives	other
6.157_197.1418	2.2463	0.1986	0.396	DOR:NOR	C18:pos	NA	C11 H19 N O2	197.142	6.157	NA	NA	NA	NA	NA	0	NA	NA	NA	other
6.157_215.1522	2.3798	0.1677	0.3887	DOR:NOR	C18:pos	N-nonanoylglycine	C11 H21 N O3	215.152	6.157	NA	S8352257	HMDB0013279	-1e-04	-0.4435	1	Organic acids and derivatives	Carboxylic acids and derivatives	Amino acids, peptides, and analogues	other
6.16_212.1026	0.0187	0.2342	0.4037	DOR:NOR	C18:pos	NA	C7 H12 N6 O2	212.103	6.16	NA	NA	NA	NA	NA	0	NA	NA	NA	other
6.161_286.2076	0.049	0.0973	0.3155	DOR:NOR	C18:pos	NA	C15 H30 N2 O S	286.208	6.161	NA	NA	NA	NA	NA	0	NA	NA	NA	other
6.176_268.1284	0.055	0.1688	0.389	DOR:NOR	C18:pos	NA	C10 H26 N2 P2 S	268.128	6.176	NA	NA	NA	NA	NA	0	NA	NA	NA	other
6.181_266.1128	0.0552	0.2832	0.4296	DOR:NOR	C18:pos	NA	C10 H14 N6 O3	266.113	6.181	NA	NA	NA	NA	NA	0	NA	NA	NA	other
6.195_316.1817	0.0253	0.0277	0.1644	DOR:NOR	C18:pos	NA	C15 H28 N2 O3 S	316.182	6.195	NA	NA	NA	NA	NA	0	NA	NA	NA	down
6.195_322.1346	57.3252	0.2923	0.4319	DOR:NOR	C18:pos	NA	C16 H22 N2 O3 S	322.135	6.195	NA	NA	NA	NA	NA	0	NA	NA	NA	other
6.202_414.2867	0.0974	0.0113	0.1009	DOR:NOR	C18:pos	NA	C19 H39 N6 O2 P	414.287	6.202	NA	NA	NA	NA	NA	0	NA	NA	NA	down
6.207_138.1046	1.1614	0.3416	0.4487	DOR:NOR	C18:pos	Isophorone	C9 H14 O	138.105	6.207	NA	S6296	HMDB0031195	-2e-04	-1.3366	13	Organooxygen compounds	Carbonyl compounds	Ketones	other
6.223_199.1574	1.4965	0.5727	0.6382	DOR:NOR	C18:pos	11-nitro-1-undecene	C11 H21 N O2	199.157	6.223	NA	S473391	HMDB0062669	-2e-04	-0.803	1	Organic 1,3-dipolar compounds	Allyl-type 1,3-dipolar organic compounds	Organic nitro compounds	other
6.223_253.1652	2.2625	0.5351	0.6044	DOR:NOR	C18:pos	NA	NA	253.165	6.223	NA	NA	NA	NA	NA	0	NA	NA	NA	other
6.23_366.1244	21370.2	0.3753	0.4692	DOR:NOR	C18:pos	7-(3-chloro-2-hydroxy-3-methylbutoxy)-8-(3-methyl-2-oxobutyl)-2h-chromen-2-one	C19 H23 Cl O5	366.124	6.23	NA	S35015113	HMDB0041136	-0.001	-2.7065	1	Phenylpropanoids and polyketides	Coumarins and derivatives	null	other
6.23_90.0449	82.5005	0.301	0.4372	DOR:NOR	C18:pos	NA	NA	90.0449	6.23	NA	NA	NA	NA	NA	0	NA	NA	NA	other
6.231_754.228	83.8122	0.4277	0.5066	DOR:NOR	C18:pos	NA	C36 H45 N4 O6 P3 S	754.228	6.231	NA	NA	NA	NA	NA	0	NA	NA	NA	other
6.231_90.0465	251.422	0.319	0.4412	DOR:NOR	C18:pos	NA	NA	90.0465	6.231	NA	NA	NA	NA	NA	0	NA	NA	NA	other
6.24_286.1977	0.1124	0.2266	0.4007	DOR:NOR	C18:pos	NA	NA	286.198	6.24	NA	NA	NA	NA	NA	0	NA	NA	NA	other
6.242_481.1343	94.3412	0.3036	0.4379	DOR:NOR	C18:pos	NA	C13 H33 N5 O6 P2 S2	481.134	6.242	NA	NA	NA	NA	NA	0	NA	NA	NA	other
6.296_511.1777	128.77	0.3117	0.4405	DOR:NOR	C18:pos	NA	C26 H31 N3 O4 P2	511.178	6.296	NA	NA	NA	NA	NA	0	NA	NA	NA	other
6.316_182.0921	0.3045	0.0507	0.2188	DOR:NOR	C18:pos	Dacarbazine	C6 H10 N6 O	182.092	6.316	NA	S10437816	HMDB0014989	-4e-04	-2.4391	1	Organic acids and derivatives	Carboxylic acids and derivatives	Carboxylic acid derivatives	other
6.326_465.0412	593.961	0.3315	0.4436	DOR:NOR	C18:pos	NA	C16 H21 N O9 P2 S	465.041	6.326	NA	NA	NA	NA	NA	0	NA	NA	NA	other
6.33_753.1312	6.2033	0.9231	0.9345	DOR:NOR	C18:pos	NA	C37 H29 N3 O11 P2	753.131	6.33	NA	NA	NA	NA	NA	0	NA	NA	NA	other
6.331_528.107	577.442	0.3313	0.4436	DOR:NOR	C18:pos	NA	NA	528.107	6.331	NA	NA	NA	NA	NA	0	NA	NA	NA	other
6.331_722.1146	83.0496	0.302	0.4372	DOR:NOR	C18:pos	NA	C34 H33 N2 O8 P3 S	722.115	6.331	NA	NA	NA	NA	NA	0	NA	NA	NA	other
6.332_509.1618	1926.98	0.3433	0.4498	DOR:NOR	C18:pos	NA	C18 H33 N5 O6 P2 S	509.162	6.332	NA	NA	NA	NA	NA	0	NA	NA	NA	other
6.332_685.2215	224.373	0.3191	0.4412	DOR:NOR	C18:pos	NA	C27 H46 N O13 P3	685.221	6.332	NA	NA	NA	NA	NA	0	NA	NA	NA	other
6.333_113.0299	332.99	0.5397	0.6084	DOR:NOR	C18:pos	Xj4375000	C5 H7 N S	113.03	6.333	NA	S10470	HMDB0032974	0	-0.1553	6	Organoheterocyclic compounds	Azoles	Thiazoles	other
6.333_159.0355	19844.2	0.3823	0.4729	DOR:NOR	C18:pos	NA	C6 H9 N O2 S	159.036	6.333	NA	NA	NA	NA	NA	0	NA	NA	NA	other
6.333_306.1031	628.468	0.3323	0.4441	DOR:NOR	C18:pos	Fluconazole	C13 H12 F2 N6 O	306.103	6.333	NA	S3248	HMDB0014342	0.001	3.1347	1	Benzenoids	Benzene and substituted derivatives	Halobenzenes	other
6.333_414.2868	0.1687	0.0718	0.2589	DOR:NOR	C18:pos	NA	C25 H38 N2 O3	414.287	6.333	NA	NA	NA	NA	NA	0	NA	NA	NA	other
6.333_493.1338	3363.2	0.3479	0.4502	DOR:NOR	C18:pos	NA	C22 H27 N3 O6 S2	493.134	6.333	NA	NA	NA	NA	NA	0	NA	NA	NA	other
6.333_690.1767	5033.88	0.3508	0.4516	DOR:NOR	C18:pos	NA	C31 H41 N4 O4 P3 S2	690.177	6.333	NA	NA	NA	NA	NA	0	NA	NA	NA	other
6.333_90.0465	744.365	0.3341	0.4453	DOR:NOR	C18:pos	NA	NA	90.0465	6.333	NA	NA	NA	NA	NA	0	NA	NA	NA	other
6.334_188.0619	384.23	0.3264	0.4414	DOR:NOR	C18:pos	NA	C7 H12 N2 O2 S	188.062	6.334	NA	NA	NA	NA	NA	0	NA	NA	NA	other
6.334_358.0756	385.192	0.3264	0.4414	DOR:NOR	C18:pos	NA	C13 H18 N4 O4 S2	358.076	6.334	NA	NA	NA	NA	NA	0	NA	NA	NA	other
6.334_379.1558	992.552	0.3371	0.4471	DOR:NOR	C18:pos	NA	C18 H25 N3 O4 S	379.156	6.334	NA	NA	NA	NA	NA	0	NA	NA	NA	other
6.334_393.1715	437.613	0.328	0.4421	DOR:NOR	C18:pos	NA	C19 H27 N3 O4 S	393.171	6.334	NA	NA	NA	NA	NA	0	NA	NA	NA	other
6.334_434.0225	633.391	0.3328	0.4441	DOR:NOR	C18:pos	NA	C18 H14 N2 O7 S2	434.022	6.334	NA	NA	NA	NA	NA	0	NA	NA	NA	other
6.334_451.0619	305.16	0.3238	0.4414	DOR:NOR	C18:pos	NA	C15 H22 N3 O7 P S2	451.062	6.334	NA	NA	NA	NA	NA	0	NA	NA	NA	other
6.337_233.0476	0.4654	0.8051	0.8347	DOR:NOR	C18:pos	NA	C7 H13 N3 O2 P2	233.048	6.337	NA	NA	NA	NA	NA	0	NA	NA	NA	other
6.345_424.1297	870.748	0.3187	0.4412	DOR:NOR	C18:pos	NA	C19 H24 N2 O7 S	424.13	6.345	NA	NA	NA	NA	NA	0	NA	NA	NA	other
6.352_208.1077	0.1006	0.2692	0.42	DOR:NOR	C18:pos	NA	C8 H12 N6 O	208.108	6.352	NA	NA	NA	NA	NA	0	NA	NA	NA	other
6.355_308.1191	149.76	0.3207	0.4412	DOR:NOR	C18:pos	NA	C9 H21 N6 O2 P S	308.119	6.355	NA	NA	NA	NA	NA	0	NA	NA	NA	other
6.356_352.1089	2999.69	0.3649	0.4602	DOR:NOR	C18:pos	2-{carboxy[(phenylacetyl)amino]methyl}-5,5-dimethyl-1,3-thiazolidine-4-carboxylic acid	C16 H20 N2 O5 S	352.109	6.356	NA	S89419	HMDB0060617	4e-04	1.077	1	Organic acids and derivatives	Carboxylic acids and derivatives	Amino acids, peptides, and analogues	other
6.356_527.1728	2056.2	0.3502	0.4514	DOR:NOR	C18:pos	NA	C24 H34 N O8 P S	527.173	6.356	NA	NA	NA	NA	NA	0	NA	NA	NA	other
6.367_220.1075	0.1409	0.3812	0.4725	DOR:NOR	C18:pos	NA	C9 H12 N6 O	220.107	6.367	NA	NA	NA	NA	NA	0	NA	NA	NA	other
6.367_612.1085	85.9672	0.3141	0.4406	DOR:NOR	C18:pos	NA	C31 H27 N4 O2 P3 S	612.109	6.367	NA	NA	NA	NA	NA	0	NA	NA	NA	other
6.372_366.1244	3684.08	0.3622	0.4588	DOR:NOR	C18:pos	7-(3-chloro-2-hydroxy-3-methylbutoxy)-8-(3-methyl-2-oxobutyl)-2h-chromen-2-one	C19 H23 Cl O5	366.124	6.372	NA	S35015113	HMDB0041136	-0.001	-2.6997	1	Phenylpropanoids and polyketides	Coumarins and derivatives	null	other
6.383_178.0996	0.0836	0.1706	0.3907	DOR:NOR	C18:pos	2140	C11 H14 O2	178.1	6.383	NA	S7367	HMDB0033376	-2e-04	-1.2124	28	Benzenoids	Benzene and substituted derivatives	Benzyloxycarbonyls	other
6.383_511.1446	76.7769	0.3175	0.4412	DOR:NOR	C18:pos	NA	C18 H35 N5 O2 P2 S3	511.145	6.383	NA	NA	NA	NA	NA	0	NA	NA	NA	other
6.396_212.1026	0.0255	0.2257	0.4006	DOR:NOR	C18:pos	NA	C7 H12 N6 O2	212.103	6.396	NA	NA	NA	NA	NA	0	NA	NA	NA	other
6.436_224.1025	0.9852	0.743	0.7838	DOR:NOR	C18:pos	NA	C8 H12 N6 O2	224.102	6.436	NA	NA	NA	NA	NA	0	NA	NA	NA	other
6.442_99.1049	0.5071	0.2238	0.4006	DOR:NOR	C18:pos	Cyclohexylamine	C6 H13 N	99.1049	6.442	C00571	S7677	HMDB0031404	-1e-04	-1.1767	2	Organic nitrogen compounds	Organonitrogen compounds	Cyclohexylamines	other
6.461_336.1467	57.4342	0.3122	0.4405	DOR:NOR	C18:pos	(2e)-3-(4-hydroxy-3-methoxyphenyl)-n-[2-(1h-indol-3-yl)ethyl]acrylamide	C20 H20 N2 O3	336.147	6.461	NA	S557005	HMDB0041519	7e-04	2.1284	1	Phenylpropanoids and polyketides	Cinnamic acids and derivatives	Hydroxycinnamic acids and derivatives	other
6.461_480.2976	0.0458	0.0252	0.1571	DOR:NOR	C18:pos	Emetine	C29 H40 N2 O4	480.298	6.461	NA	M2070	NA	0.0012	2.5731	0	NA	NA	NA	down
6.463_511.1446	156.786	0.3293	0.443	DOR:NOR	C18:pos	NA	C22 H29 N3 O7 S2	511.145	6.463	NA	NA	NA	NA	NA	0	NA	NA	NA	other
6.491_180.1151	0.8241	0.7167	0.7627	DOR:NOR	C18:pos	3-bha	C11 H16 O2	180.115	6.491	NA	S8145	HMDB0059925	-1e-04	-0.4588	10	Benzenoids	Phenols	Methoxyphenols	other
6.509_322.0982	62.5443	0.3122	0.4405	DOR:NOR	C18:pos	NA	C15 H18 N2 O4 S	322.098	6.509	NA	NA	NA	NA	NA	0	NA	NA	NA	other
6.509_366.1244	3646.71	0.3586	0.4564	DOR:NOR	C18:pos	7-(3-chloro-2-hydroxy-3-methylbutoxy)-8-(3-methyl-2-oxobutyl)-2h-chromen-2-one	C19 H23 Cl O5	366.124	6.509	NA	S35015113	HMDB0041136	-0.001	-2.7038	1	Phenylpropanoids and polyketides	Coumarins and derivatives	null	other
6.51_223.0844	9.5533	0.1578	0.3863	DOR:NOR	C18:pos	N-acetyl-l-tyrosine	C11 H13 N O4	223.084	6.51	null	M315	HMDB0000866	1e-04	0.2817	7	Organic acids and derivatives	Carboxylic acids and derivatives	Amino acids, peptides, and analogues	other
6.513_188.1348	1.4018	0.7952	0.827	DOR:NOR	C18:pos	NA	C9 H20 N2 S	188.135	6.513	NA	NA	NA	NA	NA	0	NA	NA	NA	other
6.522_240.1336	0.1684	0.1682	0.389	DOR:NOR	C18:pos	NA	C9 H16 N6 O2	240.134	6.522	NA	NA	NA	NA	NA	0	NA	NA	NA	other
6.524_298.1389	0.0441	0.2532	0.4096	DOR:NOR	C18:pos	NA	C11 H28 N2 O P2 S	298.139	6.524	NA	NA	NA	NA	NA	0	NA	NA	NA	other
6.544_156.1153	0.1482	0.2276	0.4008	DOR:NOR	C18:pos	(2e)-4-hydroxy-2-nonenal	C9 H16 O2	156.115	6.544	C21642	S4446465	HMDB0004362	-2e-04	-1.4314	29	Lipids and lipid-like molecules	Fatty Acyls	Fatty alcohols	other
6.545_170.1309	0.2065	0.2485	0.4068	DOR:NOR	C18:pos	2361	C10 H18 O2	170.131	6.545	NA	S12282	HMDB0037116	-2e-04	-1.4024	50	Organoheterocyclic compounds	Lactones	Delta valerolactones	other
6.577_182.1284	0.1616	0.9282	0.9387	DOR:NOR	C18:pos	NA	C7 H14 N6	182.128	6.577	NA	NA	NA	NA	NA	0	NA	NA	NA	other
6.594_210.1233	0.0744	0.1676	0.3887	DOR:NOR	C18:pos	NA	C8 H14 N6 O	210.123	6.594	NA	NA	NA	NA	NA	0	NA	NA	NA	other
6.598_230.1153	0.0183	0.2235	0.4006	DOR:NOR	C18:pos	3448	C12 H22 S2	230.115	6.598	NA	S16423	HMDB0041448	0.001	4.2772	1	Organosulfur compounds	Organic disulfides	Dialkyldisulfides	other
6.598_96.0214	0.1533	0.2347	0.4037	DOR:NOR	C18:pos	Furfural	C5 H4 O2	96.0214	6.598	C14279	S13863629	HMDB0032914	-3e-04	-2.7977	2	Organooxygen compounds	Carbonyl compounds	Aldehydes	other
6.599_114.0319	0.2079	0.2581	0.4133	DOR:NOR	C18:pos	3635	C5 H6 O3	114.032	6.599	NA	S3757733	HMDB0031859	-2e-04	-1.4058	2	Organoheterocyclic compounds	Dihydrofurans	Furanones	other
6.599_668.1968	426.681	0.3495	0.4511	DOR:NOR	C18:pos	NA	C34 H43 N2 O2 P3 S2	668.197	6.599	NA	NA	NA	NA	NA	0	NA	NA	NA	other
6.619_527.1728	321.851	0.3483	0.4502	DOR:NOR	C18:pos	NA	C28 H36 N O P3 S	527.173	6.619	NA	NA	NA	NA	NA	0	NA	NA	NA	other
6.62_154.0994	0.8166	0.7408	0.7827	DOR:NOR	C18:pos	Ri2735000	C9 H14 O2	154.099	6.62	NA	S7801	HMDB0031302	0	-0.2845	10	Lipids and lipid-like molecules	Fatty Acyls	Fatty acid esters	other
6.621_204.136	6.6074	0.2923	0.4319	DOR:NOR	C18:pos	4-(1,2-dihydroxy-2-propanyl)-1-methyl-1,2-cyclohexanediol	C10 H20 O4	204.136	6.621	NA	S99340	HMDB0039974	2e-04	0.8084	5	Lipids and lipid-like molecules	Prenol lipids	Monoterpenoids	other
6.622_108.094	0.8766	0.782	0.8169	DOR:NOR	C18:pos	(z)-1,3-octadiene	C8 H12	108.094	6.622	NA	S29321019	HMDB0061897	-1e-04	-0.942	1	Hydrocarbons	Unsaturated hydrocarbons	Olefins	other
6.635_168.1152	0.1312	0.2345	0.4037	DOR:NOR	C18:pos	Trans-geranic acid	C10 H16 O2	168.115	6.635	NA	S4439624	NA	-2e-04	-1.0209	21	NA	NA	NA	other
6.646_182.0921	0.0243	0.23	0.4014	DOR:NOR	C18:pos	Dacarbazine	C6 H10 N6 O	182.092	6.646	NA	S10437816	HMDB0014989	-5e-04	-2.4957	1	Organic acids and derivatives	Carboxylic acids and derivatives	Carboxylic acid derivatives	other
6.647_314.17	0.0225	0.2189	0.4006	DOR:NOR	C18:pos	NA	C12 H22 N6 O4	314.17	6.647	NA	NA	NA	NA	NA	0	NA	NA	NA	other
6.656_210.1257	0.0298	0.2006	0.3965	DOR:NOR	C18:pos	Jasmonic acid	C12 H18 O3	210.126	6.656	C08491	M457	NA	-1e-04	-0.5266	9	Lipids and lipid-like molecules	Fatty Acyls	Lineolic acids and derivatives	other
6.657_148.089	0.1611	0.1913	0.3953	DOR:NOR	C18:pos	Estragole	C10 H12 O	148.089	6.657	C10452	S13850247	HMDB0034121	-1e-04	-0.9424	13	Benzenoids	Phenol ethers	Anisoles	other
6.657_174.1047	0.0304	0.188	0.3926	DOR:NOR	C18:pos	(2z)-4-methyl-2-phenyl-2-pentenal	C12 H14 O	174.105	6.657	NA	S4516189	HMDB0037281	-2e-04	-1.2355	4	Benzenoids	Benzene and substituted derivatives	Phenylacetaldehydes	other
6.665_224.1025	1.0919	0.8743	0.8948	DOR:NOR	C18:pos	NA	C8 H12 N6 O2	224.102	6.665	NA	NA	NA	NA	NA	0	NA	NA	NA	other
6.671_686.2059	716.859	0.4136	0.4971	DOR:NOR	C18:pos	NA	C34 H45 N2 O3 P3 S2	686.206	6.671	NA	NA	NA	NA	NA	0	NA	NA	NA	other
6.692_330.1973	0.0027	0.017	0.1252	DOR:NOR	C18:pos	NA	C16 H30 N2 O3 S	330.197	6.692	NA	NA	NA	NA	NA	0	NA	NA	NA	down
6.694_220.1076	0.103	0.2198	0.4006	DOR:NOR	C18:pos	NA	C9 H12 N6 O	220.108	6.694	NA	NA	NA	NA	NA	0	NA	NA	NA	other
6.696_211.1573	1.6987	0.3076	0.4385	DOR:NOR	C18:pos	NA	C12 H21 N O2	211.157	6.696	NA	NA	NA	NA	NA	0	NA	NA	NA	other
6.696_229.1677	1.6542	0.3171	0.4412	DOR:NOR	C18:pos	1872050	C12 H23 N O3	229.168	6.696	NA	S1361783	HMDB0013267	1e-04	0.3619	1	Organic acids and derivatives	Carboxylic acids and derivatives	Amino acids, peptides, and analogues	other
6.697_134.1097	0.2104	0.2291	0.4011	DOR:NOR	C18:pos	P-cymene	C10 H14	134.11	6.697	C06575	S7183	HMDB0005805	-2e-04	-1.2639	11	Lipids and lipid-like molecules	Prenol lipids	Monoterpenoids	other
6.7_180.1152	0.171	0.2262	0.4006	DOR:NOR	C18:pos	3-bha	C11 H16 O2	180.115	6.7	NA	S8145	HMDB0059925	-1e-04	-0.7726	10	Benzenoids	Phenols	Methoxyphenols	other
6.733_187.1937	5.758	0.0678	0.2509	DOR:NOR	C18:pos	NA	C11 H25 N O	187.194	6.733	NA	NA	NA	NA	NA	0	NA	NA	NA	other
6.745_154.0994	1.701	0.4715	0.5469	DOR:NOR	C18:pos	Ri2735000	C9 H14 O2	154.099	6.745	NA	S7801	HMDB0031302	0	-0.015	10	Lipids and lipid-like molecules	Fatty Acyls	Fatty acid esters	other
6.754_298.1754	0.0472	0.2273	0.4007	DOR:NOR	C18:pos	NA	C12 H22 N6 O3	298.175	6.754	NA	NA	NA	NA	NA	0	NA	NA	NA	other
6.755_200.1412	3.0194	0.3062	0.4385	DOR:NOR	C18:pos	9-hydroxy-10-undecenoic acid	C11 H20 O3	200.141	6.755	NA	S8640809	HMDB0032662	1e-04	0.2979	3	Organic acids and derivatives	Hydroxy acids and derivatives	Medium-chain hydroxy acids and derivatives	other
6.756_185.1416	3.2432	0.2675	0.4189	DOR:NOR	C18:pos	NA	C10 H19 N O2	185.142	6.756	NA	NA	NA	NA	NA	0	NA	NA	NA	other
6.756_186.1256	2.5833	0.2595	0.4138	DOR:NOR	C18:pos	1,3,3-trimethyl-2-oxabicyclo[2.2.2]octane-6,7-diol	C10 H18 O3	186.126	6.756	NA	S102967	HMDB0041376	0	0.2576	13	Organoheterocyclic compounds	Oxanes	null	other
6.756_208.1076	2.2111	0.2367	0.4044	DOR:NOR	C18:pos	NA	C8 H12 N6 O	208.108	6.756	NA	NA	NA	NA	NA	0	NA	NA	NA	other
6.756_240.1336	2.0858	0.5249	0.596	DOR:NOR	C18:pos	NA	C9 H16 N6 O2	240.134	6.756	NA	NA	NA	NA	NA	0	NA	NA	NA	other
6.757_136.0888	1.4281	0.7463	0.7866	DOR:NOR	C18:pos	4329	C9 H12 O	136.089	6.757	NA	S10248	HMDB0032544	0	-0.1285	22	Benzenoids	Benzene and substituted derivatives	Phenols and derivatives	other
6.758_108.094	2.2369	0.2712	0.421	DOR:NOR	C18:pos	(z)-1,3-octadiene	C8 H12	108.094	6.758	NA	S29321019	HMDB0061897	0	-0.3897	1	Hydrocarbons	Unsaturated hydrocarbons	Olefins	other
6.76_483.1498	88.5362	0.3216	0.4414	DOR:NOR	C18:pos	NA	C21 H29 N3 O6 S2	483.15	6.76	NA	NA	NA	NA	NA	0	NA	NA	NA	other
6.765_178.1357	1.2311	0.832	0.8573	DOR:NOR	C18:pos	Propofol	C12 H18 O	178.136	6.765	NA	S4774	HMDB0014956	1e-04	0.33	10	Benzenoids	Benzene and substituted derivatives	Cumenes	other
6.766_213.1729	1.2512	0.9682	0.9716	DOR:NOR	C18:pos	NA	C12 H23 N O2	213.173	6.766	NA	NA	NA	NA	NA	0	NA	NA	NA	other
6.766_267.1807	1.6024	0.8832	0.9021	DOR:NOR	C18:pos	NA	C10 H25 N3 O5	267.181	6.766	NA	NA	NA	NA	NA	0	NA	NA	NA	other
6.769_348.1137	79.5929	0.3205	0.4412	DOR:NOR	C18:pos	NA	C17 H20 N2 O4 S	348.114	6.769	NA	NA	NA	NA	NA	0	NA	NA	NA	other
6.77_173.0511	56.5233	0.314	0.4406	DOR:NOR	C18:pos	NA	C7 H11 N O2 S	173.051	6.77	NA	NA	NA	NA	NA	0	NA	NA	NA	other
6.782_226.118	0.3443	0.2939	0.4329	DOR:NOR	C18:pos	NA	C8 H14 N6 O2	226.118	6.782	NA	NA	NA	NA	NA	0	NA	NA	NA	other
6.785_194.0921	0.0754	0.1308	0.36	DOR:NOR	C18:pos	NA	C7 H10 N6 O	194.092	6.785	NA	NA	NA	NA	NA	0	NA	NA	NA	other
6.797_143.131	3.7608	0.0393	0.1909	DOR:NOR	C18:pos	NA	C8 H17 N O	143.131	6.797	NA	NA	NA	NA	NA	0	NA	NA	NA	up
6.798_289.2612	1.8101	0.6799	0.7305	DOR:NOR	C18:pos	NA	C16 H35 N O3	289.261	6.798	NA	NA	NA	NA	NA	0	NA	NA	NA	other
6.83_249.1362	47.9209	0.3391	0.4473	DOR:NOR	C18:pos	N-pentanoylphenylalanine	C14 H19 N O3	249.136	6.83	NA	S14753835	HMDB0094646	3e-04	1.2182	1	Organic acids and derivatives	Carboxylic acids and derivatives	Amino acids, peptides, and analogues	other
6.831_215.1885	0.7647	0.4252	0.5044	DOR:NOR	C18:pos	NA	C12 H25 N O2	215.189	6.831	NA	NA	NA	NA	NA	0	NA	NA	NA	other
6.836_269.21	1.692	0.1366	0.366	DOR:NOR	C18:pos	NA	C14 H27 N3 O2	269.21	6.836	NA	NA	NA	NA	NA	0	NA	NA	NA	other
6.836_323.2179	1.5268	0.2285	0.401	DOR:NOR	C18:pos	NA	C12 H29 N5 O5	323.218	6.836	NA	NA	NA	NA	NA	0	NA	NA	NA	other
6.842_164.0837	3.4583	0.1166	0.3427	DOR:NOR	C18:pos	Eugenol	C10 H12 O2	164.084	6.842	C10453	S13876103	HMDB0005809	0	0.1751	49	Benzenoids	Phenols	Methoxyphenols	other
6.843_468.2118	289.049	0.3592	0.4566	DOR:NOR	C18:pos	NA	C23 H38 N2 O2 P2 S	468.212	6.843	NA	NA	NA	NA	NA	0	NA	NA	NA	other
6.844_150.068	6.9983	0.3627	0.459	DOR:NOR	C18:pos	3-phenylpropanoic acid	C9 H10 O2	150.068	6.844	C05629	S10181339	HMDB0000764	0	0.2948	32	Phenylpropanoids and polyketides	Phenylpropanoic acids	null	other
6.849_180.1152	0.1967	0.2699	0.4209	DOR:NOR	C18:pos	3-bha	C11 H16 O2	180.115	6.849	NA	S8145	HMDB0059925	-1e-04	-0.7726	10	Benzenoids	Phenols	Methoxyphenols	other
6.852_164.1203	0.0871	0.1913	0.3953	DOR:NOR	C18:pos	4-(1,1-dimethylpropyl)phenol	C11 H16 O	164.12	6.852	NA	S21106091	NA	-1e-04	-0.8892	14	NA	NA	NA	other
6.852_264.1336	0.0863	0.1997	0.396	DOR:NOR	C18:pos	NA	C11 H16 N6 O2	264.134	6.852	NA	NA	NA	NA	NA	0	NA	NA	NA	other
6.858_155.1312	0.0793	0.2102	0.4006	DOR:NOR	C18:pos	To0127900	C9 H17 N O	155.131	6.858	NA	S12665	HMDB0031179	-2e-04	-0.9922	4	Organoheterocyclic compounds	Piperidines	Piperidinones	other
6.864_201.2093	2.4864	0.0924	0.3047	DOR:NOR	C18:pos	NA	C12 H27 N O	201.209	6.864	NA	NA	NA	NA	NA	0	NA	NA	NA	other
6.866_527.1728	1203.04	0.3764	0.47	DOR:NOR	C18:pos	NA	C24 H34 N O8 P S	527.173	6.866	NA	NA	NA	NA	NA	0	NA	NA	NA	other
6.866_612.1085	49.9333	0.3469	0.4502	DOR:NOR	C18:pos	NA	C26 H26 N6 O6 P2 S	612.109	6.866	NA	NA	NA	NA	NA	0	NA	NA	NA	other
6.867_192.1153	0.0376	0.1843	0.3915	DOR:NOR	C18:pos	2058	C12 H16 O2	192.115	6.867	NA	S6925	HMDB0033380	-3e-04	-1.3235	23	Benzenoids	Benzene and substituted derivatives	Benzoic acids and derivatives	other
6.868_170.1309	0.2289	0.2574	0.4132	DOR:NOR	C18:pos	2361	C10 H18 O2	170.131	6.868	NA	S12282	HMDB0037116	-2e-04	-1.3945	50	Organoheterocyclic compounds	Lactones	Delta valerolactones	other
6.868_181.123	0.0519	0.2574	0.4132	DOR:NOR	C18:pos	NA	NA	181.123	6.868	NA	NA	NA	NA	NA	0	NA	NA	NA	other
6.871_331.2135	0.0317	0.1241	0.3494	DOR:NOR	C18:pos	NA	C20 H29 N O3	331.214	6.871	NA	NA	NA	NA	NA	0	NA	NA	NA	other
6.873_416.3024	0.0772	0.0071	0.0827	DOR:NOR	C18:pos	NA	C25 H40 N2 O3	416.302	6.873	NA	NA	NA	NA	NA	0	NA	NA	NA	down
6.877_314.17	0.0102	0.2139	0.4006	DOR:NOR	C18:pos	NA	C12 H22 N6 O4	314.17	6.877	NA	NA	NA	NA	NA	0	NA	NA	NA	other
6.879_150.1046	0.2795	0.2405	0.4048	DOR:NOR	C18:pos	Carvone	C10 H14 O	150.105	6.879	null	M343	HMDB0035824	-1e-04	-0.8425	27	Lipids and lipid-like molecules	Prenol lipids	Monoterpenoids	other
6.879_208.1465	0.1281	0.2197	0.4006	DOR:NOR	C18:pos	2251	C13 H20 O2	208.147	6.879	NA	S7059	HMDB0038047	-2e-04	-0.9607	14	Lipids and lipid-like molecules	Prenol lipids	Monoterpenoids	other
6.884_152.1202	0.2474	0.2427	0.4064	DOR:NOR	C18:pos	D,l-camphor	C10 H16 O	152.12	6.884	C00808	M6584	NA	-1e-04	-0.8279	79	null	null	null	other
6.884_194.1309	0.1052	0.236	0.404	DOR:NOR	C18:pos	Hexylresorcinol	C12 H18 O2	194.131	6.884	NA	S21106121	HMDB0032567	-2e-04	-1.0305	18	Benzenoids	Benzene and substituted derivatives	Phenols and derivatives	other
6.886_94.0783	0.348	0.2752	0.4238	DOR:NOR	C18:pos	1,3,5-heptatriene	C7 H10	94.0783	6.886	NA	S4518902	HMDB0061889	-1e-04	-0.9121	3	Hydrocarbons	Unsaturated hydrocarbons	Olefins	other
6.887_184.1465	0.0882	0.1974	0.396	DOR:NOR	C18:pos	10-undecenoic acid	C11 H20 O2	184.147	6.887	NA	S10771160	HMDB0033724	-2e-04	-0.8882	32	Lipids and lipid-like molecules	Fatty Acyls	Fatty acids and conjugates	other
6.888_210.1235	0.0178	0.154	0.3851	DOR:NOR	C18:pos	NA	NA	210.124	6.888	NA	NA	NA	NA	NA	0	NA	NA	NA	other
6.889_120.094	0.2547	0.3165	0.4412	DOR:NOR	C18:pos	Cumene	C9 H12	120.094	6.889	NA	S7128	HMDB0034029	-1e-04	-0.6469	8	Benzenoids	Benzene and substituted derivatives	Cumenes	other
6.889_156.1152	0.2748	0.3391	0.4473	DOR:NOR	C18:pos	(2e)-4-hydroxy-2-nonenal	C9 H16 O2	156.115	6.889	C21642	S4446465	HMDB0004362	-2e-04	-1.0235	29	Lipids and lipid-like molecules	Fatty Acyls	Fatty alcohols	other
6.894_282.1439	0.0165	0.3006	0.4372	DOR:NOR	C18:pos	NA	C11 H18 N6 O3	282.144	6.894	NA	NA	NA	NA	NA	0	NA	NA	NA	other
6.895_509.1293	374.892	0.3692	0.4632	DOR:NOR	C18:pos	NA	C22 H29 N3 O5 P2 S	509.129	6.895	NA	NA	NA	NA	NA	0	NA	NA	NA	other
6.897_176.1202	0.0894	0.2374	0.4044	DOR:NOR	C18:pos	2740	C12 H16 O	176.12	6.897	NA	S190439	HMDB0031569	-1e-04	-0.7045	5	Benzenoids	Benzene and substituted derivatives	null	other
6.9_256.121	40.7466	0.3452	0.4502	DOR:NOR	C18:pos	1-(9h-beta-carbolin-1-yl)-1,4-butanediol	C15 H16 N2 O2	256.121	6.9	NA	S35013869	HMDB0035193	2e-04	0.7662	1	Alkaloids and derivatives	Harmala alkaloids	null	other
6.904_191.131	1.7286	0.0088	0.0884	DOR:NOR	C18:pos	Diethyl-2-phenylacetamide	C12 H17 N O	191.131	6.904	NA	S16161	HMDB0032635	0	-0.0347	3	Benzenoids	Benzene and substituted derivatives	Phenylacetamides	up
6.91_349.224	0.0169	0.1645	0.3874	DOR:NOR	C18:pos	NA	C14 H32 N5 O3 P	349.224	6.91	NA	NA	NA	NA	NA	0	NA	NA	NA	other
6.912_177.1153	8.1978	0.2498	0.4074	DOR:NOR	C18:pos	Phenmetrazine	C11 H15 N O	177.115	6.912	NA	S4598	HMDB0014968	1e-04	0.418	11	Organoheterocyclic compounds	Oxazinanes	Morpholines	other
6.913_686.2059	348.15	0.3675	0.4619	DOR:NOR	C18:pos	NA	C29 H45 N4 O5 P3 S2	686.206	6.913	NA	NA	NA	NA	NA	0	NA	NA	NA	other
6.914_508.2079	281.383	0.3645	0.4602	DOR:NOR	C18:pos	NA	C15 H37 N6 O9 P S	508.208	6.914	NA	NA	NA	NA	NA	0	NA	NA	NA	other
6.916_134.0733	1.5097	0.0127	0.108	DOR:NOR	C18:pos	Cinnamyl alcohol	C9 H10 O	134.073	6.916	C02394	S21105870	HMDB0029698	-1e-04	-0.8094	16	Phenylpropanoids and polyketides	Cinnamyl alcohols	null	up
6.92_106.0419	1.5177	0.1823	0.3915	DOR:NOR	C18:pos	Benzaldehyde	C7 H6 O	106.042	6.92	C00261	S235	HMDB0006115	-1e-04	-0.7997	1	Benzenoids	Benzene and substituted derivatives	Benzoyl derivatives	other
6.921_162.1046	1.8122	0.1299	0.3582	DOR:NOR	C18:pos	Valerophenone	C11 H14 O	162.105	6.921	NA	M935	NA	-2e-04	-0.9881	10	NA	NA	NA	other
6.942_349.1143	1.4553	0.0459	0.2084	DOR:NOR	C18:pos	Voriconazole	C16 H14 F3 N5 O	349.114	6.942	NA	S64684	HMDB0014720	7e-04	2.0832	2	Benzenoids	Benzene and substituted derivatives	Phenylpropanes	up
6.946_483.1498	406.997	0.3601	0.4571	DOR:NOR	C18:pos	NA	C21 H29 N3 O6 S2	483.15	6.946	NA	NA	NA	NA	NA	0	NA	NA	NA	other
6.95_483.1822	154.483	0.3473	0.4502	DOR:NOR	C18:pos	NA	C25 H29 N3 O5 S	483.182	6.95	NA	NA	NA	NA	NA	0	NA	NA	NA	other
6.964_238.118	0.7757	0.6863	0.7353	DOR:NOR	C18:pos	NA	C9 H14 N6 O2	238.118	6.964	NA	NA	NA	NA	NA	0	NA	NA	NA	other
6.967_230.1517	0.9138	0.7853	0.8196	DOR:NOR	C18:pos	Dodecanedioic acid	C12 H22 O4	230.152	6.967	NA	S12213	HMDB0000623	1e-04	0.2587	4	Lipids and lipid-like molecules	Fatty Acyls	Fatty acids and conjugates	other
6.978_168.1153	0.4633	0.3587	0.4564	DOR:NOR	C18:pos	Trans-geranic acid	C10 H16 O2	168.115	6.978	NA	S4439624	NA	-2e-04	-1.3723	21	NA	NA	NA	other
6.994_183.1625	3.4477	0.0394	0.1909	DOR:NOR	C18:pos	NA	C11 H21 N O	183.162	6.994	NA	NA	NA	NA	NA	0	NA	NA	NA	up
6.995_231.1832	7.0732	0.0094	0.0904	DOR:NOR	C18:pos	NA	C12 H25 N O3	231.183	6.995	NA	NA	NA	NA	NA	0	NA	NA	NA	up
6.995_235.1546	6.0878	0.0732	0.2625	DOR:NOR	C18:pos	NA	NA	235.155	6.995	NA	NA	NA	NA	NA	0	NA	NA	NA	other
6.997_333.2291	0.1608	0.017	0.1252	DOR:NOR	C18:pos	NA	C14 H32 N5 O2 P	333.229	6.997	NA	NA	NA	NA	NA	0	NA	NA	NA	down
6.997_378.2869	0.1045	0.0388	0.1909	DOR:NOR	C18:pos	NA	C16 H39 N6 O2 P	378.287	6.997	NA	NA	NA	NA	NA	0	NA	NA	NA	down
7.01_238.1568	0.1368	0.2874	0.431	DOR:NOR	C18:pos	(2z)-3,7-dimethyl-2,6-octadien-1-yl 3-oxobutanoate	C14 H22 O3	238.157	7.01	NA	S30777244	HMDB0038256	1e-04	0.5055	2	Lipids and lipid-like molecules	Fatty Acyls	Fatty alcohol esters	other
7.015_349.2241	0.0176	0.1984	0.396	DOR:NOR	C18:pos	NA	C14 H32 N5 O3 P	349.224	7.015	NA	NA	NA	NA	NA	0	NA	NA	NA	other
7.039_180.115	1.6905	0.8303	0.8563	DOR:NOR	C18:pos	3-bha	C11 H16 O2	180.115	7.039	NA	S8145	HMDB0059925	0	-0.0101	10	Benzenoids	Phenols	Methoxyphenols	other
7.051_182.1309	0.1676	0.2342	0.4037	DOR:NOR	C18:pos	Ethyl 2-nonynoate	C11 H18 O2	182.131	7.051	NA	S55374	HMDB0036215	-2e-04	-1.0883	18	Lipids and lipid-like molecules	Fatty Acyls	Fatty acid esters	other
7.051_222.1233	0.2218	0.246	0.4068	DOR:NOR	C18:pos	NA	C9 H14 N6 O	222.123	7.051	NA	NA	NA	NA	NA	0	NA	NA	NA	other
7.052_214.1569	0.1003	0.2355	0.404	DOR:NOR	C18:pos	2-hexyltetrahydrofuran-4-yl acetate	C12 H22 O3	214.157	7.052	NA	S55379	HMDB0037398	-1e-04	-0.2572	2	Organoheterocyclic compounds	Tetrahydrofurans	null	other
7.052_254.1493	0.1024	0.2155	0.4006	DOR:NOR	C18:pos	NA	C10 H18 N6 O2	254.149	7.052	NA	NA	NA	NA	NA	0	NA	NA	NA	other
7.063_686.2059	912.863	0.3853	0.4739	DOR:NOR	C18:pos	NA	C31 H40 N6 O4 P2 S2	686.206	7.063	NA	NA	NA	NA	NA	0	NA	NA	NA	other
7.074_331.2135	0.0297	0.1069	0.329	DOR:NOR	C18:pos	NA	C14 H30 N5 O2 P	331.214	7.074	NA	NA	NA	NA	NA	0	NA	NA	NA	other
7.132_330.2187	0.0623	0.2917	0.4319	DOR:NOR	C18:pos	Hydroxyprogesterone	C21 H30 O3	330.219	7.132	C01176	S6002	HMDB0000374	8e-04	2.4423	18	Lipids and lipid-like molecules	Steroids and steroid derivatives	Pregnane steroids	other
7.143_224.1413	0.1204	0.2455	0.4068	DOR:NOR	C18:pos	Methyl jasmonate	C13 H20 O3	224.141	7.143	C11512	S4445210	HMDB0036583	0	-0.0042	10	Lipids and lipid-like molecules	Fatty Acyls	Lineolic acids and derivatives	other
7.144_188.1202	0.0794	0.1716	0.3913	DOR:NOR	C18:pos	(2e)-5-methyl-2-phenylhex-2-enal	C13 H16 O	188.12	7.144	NA	S4521383	HMDB0031855	-1e-04	-0.4973	4	Benzenoids	Benzene and substituted derivatives	Phenylacetaldehydes	other
7.148_237.0999	10.7505	0.2203	0.4006	DOR:NOR	C18:pos	1383873	C12 H15 N O4	237.1	7.148	NA	S26024	HMDB0032775	3e-04	1.0868	4	Organoheterocyclic compounds	Coumarans	null	other
7.149_377.2185	0.0476	0.1252	0.3511	DOR:NOR	C18:pos	NA	C17 H37 N3 P2 S	377.219	7.149	NA	NA	NA	NA	NA	0	NA	NA	NA	other
7.163_257.1986	3.7047	0.2212	0.4006	DOR:NOR	C18:pos	N-lauroylglycine	C14 H27 N O3	257.199	7.163	NA	S307040	HMDB0013272	4e-04	1.743	1	Organic acids and derivatives	Carboxylic acids and derivatives	Amino acids, peptides, and analogues	other
7.163_508.3483	36.9484	0.3797	0.4718	DOR:NOR	C18:pos	NA	C32 H48 N2 O S	508.348	7.163	NA	NA	NA	NA	NA	0	NA	NA	NA	other
7.164_162.1407	3.6365	0.2419	0.4057	DOR:NOR	C18:pos	Hexylbenzene	C12 H18	162.141	7.164	NA	S13487	HMDB0061815	1e-04	0.7145	3	Benzenoids	Benzene and substituted derivatives	null	other
7.164_197.1779	3.6268	0.2114	0.4006	DOR:NOR	C18:pos	NA	C12 H23 N O	197.178	7.164	NA	NA	NA	NA	NA	0	NA	NA	NA	other
7.164_207.1621	4.1276	0.2447	0.4068	DOR:NOR	C18:pos	246i1d7tdl	C13 H21 N O	207.162	7.164	NA	S30778574	HMDB0060611	2e-04	0.8027	1	Benzenoids	Benzene and substituted derivatives	Phenylpropanes	other
7.165_243.1833	3.5301	0.2216	0.4006	DOR:NOR	C18:pos	N-undecanoylglycine	C13 H25 N O3	243.183	7.165	NA	S399857	HMDB0013286	2e-04	0.7216	1	Organic acids and derivatives	Carboxylic acids and derivatives	Amino acids, peptides, and analogues	other
7.165_288.2406	1.9729	0.2128	0.4006	DOR:NOR	C18:pos	NA	C15 H32 N2 O3	288.241	7.165	NA	NA	NA	NA	NA	0	NA	NA	NA	other
7.176_668.1965	167.171	0.3201	0.4412	DOR:NOR	C18:pos	NA	C29 H43 N4 O4 P3 S2	668.197	7.176	NA	NA	NA	NA	NA	0	NA	NA	NA	other
7.178_349.2241	0.0066	0.1609	0.3863	DOR:NOR	C18:pos	NA	C14 H32 N5 O3 P	349.224	7.178	NA	NA	NA	NA	NA	0	NA	NA	NA	other
7.179_686.2059	220.53	0.3893	0.4767	DOR:NOR	C18:pos	NA	C29 H45 N4 O5 P3 S2	686.206	7.179	NA	NA	NA	NA	NA	0	NA	NA	NA	other
7.18_333.2291	0.1317	0.0885	0.2969	DOR:NOR	C18:pos	NA	C20 H31 N O3	333.229	7.18	NA	NA	NA	NA	NA	0	NA	NA	NA	other
7.18_493.1338	68.21	0.3086	0.4385	DOR:NOR	C18:pos	NA	C24 H24 N5 O3 P S	493.134	7.18	NA	NA	NA	NA	NA	0	NA	NA	NA	other
7.196_259.2506	2.3663	0.3031	0.4377	DOR:NOR	C18:pos	NA	C15 H33 N O2	259.251	7.196	NA	NA	NA	NA	NA	0	NA	NA	NA	other
7.202_438.1728	0.1314	0.0736	0.2637	DOR:NOR	C18:pos	NA	C15 H32 N6 O3 P2 S	438.173	7.202	NA	NA	NA	NA	NA	0	NA	NA	NA	other
7.204_331.2135	0.1092	0.0446	0.2044	DOR:NOR	C18:pos	NA	C20 H29 N O3	331.214	7.204	NA	NA	NA	NA	NA	0	NA	NA	NA	down
7.221_303.2765	8.6296	0.5937	0.6544	DOR:NOR	C18:pos	NA	C17 H37 N O3	303.276	7.221	NA	NA	NA	NA	NA	0	NA	NA	NA	other
7.224_242.1993	0.8238	0.8495	0.873	DOR:NOR	C18:pos	NA	C13 H26 N2 O2	242.199	7.224	NA	NA	NA	NA	NA	0	NA	NA	NA	other
7.237_476.3581	1.8379	0.2814	0.4288	DOR:NOR	C18:pos	NA	C23 H48 N4 O6	476.358	7.237	NA	NA	NA	NA	NA	0	NA	NA	NA	other
7.238_241.204	1.2664	0.3902	0.4768	DOR:NOR	C18:pos	NA	C14 H27 N O2	241.204	7.238	NA	NA	NA	NA	NA	0	NA	NA	NA	other
7.238_267.1805	1.7392	0.3423	0.4493	DOR:NOR	C18:pos	NA	C10 H25 N3 O5	267.18	7.238	NA	NA	NA	NA	NA	0	NA	NA	NA	other
7.238_327.1123	2.2452	0.3466	0.4502	DOR:NOR	C18:pos	Loxapine	C18 H18 Cl N3 O	327.112	7.238	NA	S3827	HMDB0014552	0.0015	4.5205	2	Organoheterocyclic compounds	Benzoxazepines	Dibenzoxazepines	other
7.238_94.0783	1.4702	0.4056	0.4898	DOR:NOR	C18:pos	1,3,5-heptatriene	C7 H10	94.0783	7.238	NA	S4518902	HMDB0061889	0	-0.4255	3	Hydrocarbons	Unsaturated hydrocarbons	Olefins	other
7.239_181.123	0.0203	0.2234	0.4006	DOR:NOR	C18:pos	NA	NA	181.123	7.239	NA	NA	NA	NA	NA	0	NA	NA	NA	other
7.239_192.1515	2.1248	0.3071	0.4385	DOR:NOR	C18:pos	2595	C13 H20 O	192.151	7.239	NA	S553581	HMDB0036565	-1e-04	-0.2931	24	Lipids and lipid-like molecules	Prenol lipids	Sesquiterpenoids	other
7.239_210.162	2.065	0.3373	0.4471	DOR:NOR	C18:pos	Rg5927903	C13 H22 O2	210.162	7.239	NA	S55049	HMDB0030425	-1e-04	-0.2934	12	Lipids and lipid-like molecules	Prenol lipids	Monoterpenoids	other
7.239_227.1884	1.9045	0.2809	0.4284	DOR:NOR	C18:pos	NA	C13 H25 N O2	227.188	7.239	NA	NA	NA	NA	NA	0	NA	NA	NA	other
7.239_242.1878	2.0967	0.4292	0.5077	DOR:NOR	C18:pos	3-oxotetradecanoic acid	C14 H26 O3	242.188	7.239	NA	S399829	HMDB0010730	4e-04	1.5136	3	Lipids and lipid-like molecules	Fatty Acyls	Fatty acids and conjugates	other
7.239_249.1704	1.6155	0.1883	0.3926	DOR:NOR	C18:pos	NA	NA	249.17	7.239	NA	NA	NA	NA	NA	0	NA	NA	NA	other
7.239_272.246	1.1347	0.5802	0.6444	DOR:NOR	C18:pos	NA	C15 H32 N2 O2	272.246	7.239	NA	NA	NA	NA	NA	0	NA	NA	NA	other
7.239_281.1962	1.9583	0.36	0.4571	DOR:NOR	C18:pos	NA	C11 H27 N3 O5	281.196	7.239	NA	NA	NA	NA	NA	0	NA	NA	NA	other
7.24_108.0939	1.7531	0.2641	0.4166	DOR:NOR	C18:pos	(z)-1,3-octadiene	C8 H12	108.094	7.24	NA	S29321019	HMDB0061897	0	-0.0835	1	Hydrocarbons	Unsaturated hydrocarbons	Olefins	other
7.241_174.141	2.1785	0.2799	0.4275	DOR:NOR	C18:pos	Ionene	C13 H18	174.141	7.241	NA	S61372	HMDB0059826	-2e-04	-0.886	4	Benzenoids	Tetralins	null	other
7.242_178.0995	1.522	0.018	0.1301	DOR:NOR	C18:pos	Isobutyl benzoate	C11 H14 O2	178.1	7.242	NA	M2585	NA	-1e-04	-0.5351	28	NA	NA	NA	up
7.252_508.3453	0.7376	0.362	0.4588	DOR:NOR	C18:pos	NA	C29 H45 N6 P	508.345	7.252	NA	NA	NA	NA	NA	0	NA	NA	NA	other
7.253_507.3395	0.7443	0.3594	0.4566	DOR:NOR	C18:pos	NA	NA	507.339	7.253	NA	NA	NA	NA	NA	0	NA	NA	NA	other
7.266_186.1044	10.2166	0.2902	0.4319	DOR:NOR	C18:pos	(2e)-2-tridecene-4,6,8-triyn-1-ol	C13 H14 O	186.104	7.266	NA	S30776864	HMDB0030931	0	0.238	2	Lipids and lipid-like molecules	Fatty Acyls	Fatty alcohols	other
7.267_104.0262	7.1919	0.2841	0.4299	DOR:NOR	C18:pos	NA	C7 H4 O	104.026	7.267	NA	NA	NA	NA	NA	0	NA	NA	NA	other
7.267_503.314	0.0813	0.0391	0.1909	DOR:NOR	C18:pos	NA	C23 H47 N5 O3 P2	503.314	7.267	NA	NA	NA	NA	NA	0	NA	NA	NA	down
7.269_226.097	12.443	0.2039	0.4	DOR:NOR	C18:pos	NA	C11 H10 N6	226.097	7.269	NA	NA	NA	NA	NA	0	NA	NA	NA	other
7.27_433.337	0.5353	0.1835	0.3915	DOR:NOR	C18:pos	NA	C21 H48 N5 P S	433.337	7.27	NA	NA	NA	NA	NA	0	NA	NA	NA	other
7.285_349.224	0.0084	0.237	0.4044	DOR:NOR	C18:pos	NA	C14 H32 N5 O3 P	349.224	7.285	NA	NA	NA	NA	NA	0	NA	NA	NA	other
7.293_229.2038	16.5625	0.3304	0.4434	DOR:NOR	C18:pos	NA	C13 H27 N O2	229.204	7.293	NA	NA	NA	NA	NA	0	NA	NA	NA	other
7.314_246.1231	0.208	0.2714	0.421	DOR:NOR	C18:pos	NA	C11 H14 N6 O	246.123	7.314	NA	NA	NA	NA	NA	0	NA	NA	NA	other
7.315_182.1309	0.2968	0.2166	0.4006	DOR:NOR	C18:pos	Ethyl 2-nonynoate	C11 H18 O2	182.131	7.315	NA	S55374	HMDB0036215	-2e-04	-1.1843	18	Lipids and lipid-like molecules	Fatty Acyls	Fatty acid esters	other
7.319_242.1992	0.9203	0.9013	0.9177	DOR:NOR	C18:pos	NA	C13 H26 N2 O2	242.199	7.319	NA	NA	NA	NA	NA	0	NA	NA	NA	other
7.322_331.2135	0.1281	0.0315	0.1721	DOR:NOR	C18:pos	NA	C14 H30 N5 O2 P	331.214	7.322	NA	NA	NA	NA	NA	0	NA	NA	NA	down
7.326_333.2291	0.2025	0.0151	0.1179	DOR:NOR	C18:pos	NA	C14 H32 N5 O2 P	333.229	7.326	NA	NA	NA	NA	NA	0	NA	NA	NA	down
7.327_332.2212	0.1211	0.0673	0.2509	DOR:NOR	C18:pos	NA	NA	332.221	7.327	NA	NA	NA	NA	NA	0	NA	NA	NA	other
7.35_289.2031	0.123	0.2059	0.4002	DOR:NOR	C18:pos	Dyclonine	C18 H27 N O2	289.203	7.35	NA	S3068	HMDB0014783	0.0011	3.9504	2	Organic oxygen compounds	Organooxygen compounds	Carbonyl compounds	other
7.353_246.071	2.5463	0.1918	0.3953	DOR:NOR	C18:pos	NA	C14 H14 O2 S	246.071	7.353	NA	NA	NA	NA	NA	0	NA	NA	NA	other
7.357_375.2518	1.0797	0.9085	0.9239	DOR:NOR	C18:pos	NA	C21 H33 N3 O3	375.252	7.357	NA	NA	NA	NA	NA	0	NA	NA	NA	other
7.357_434.3252	1.1127	0.8911	0.909	DOR:NOR	C18:pos	NA	C22 H47 N2 O4 P	434.325	7.357	NA	NA	NA	NA	NA	0	NA	NA	NA	other
7.357_767.5282	0.8779	0.5934	0.6544	DOR:NOR	C18:pos	NA	C38 H80 N3 O6 P3	767.528	7.357	NA	NA	NA	NA	NA	0	NA	NA	NA	other
7.357_772.4836	1.1753	0.8826	0.9019	DOR:NOR	C18:pos	NA	C41 H71 N6 O2 P3	772.484	7.357	NA	NA	NA	NA	NA	0	NA	NA	NA	other
7.358_420.3096	0.9768	0.7005	0.7478	DOR:NOR	C18:pos	NA	C23 H40 N4 O3	420.31	7.358	NA	NA	NA	NA	NA	0	NA	NA	NA	other
7.358_450.3202	1.0079	0.7362	0.7793	DOR:NOR	C18:pos	NA	C24 H42 N4 O4	450.32	7.358	NA	NA	NA	NA	NA	0	NA	NA	NA	other
7.371_493.1338	47.7013	0.3912	0.4774	DOR:NOR	C18:pos	NA	C24 H24 N5 O3 P S	493.134	7.371	NA	NA	NA	NA	NA	0	NA	NA	NA	other
7.375_686.2063	164.831	0.3962	0.4817	DOR:NOR	C18:pos	NA	C34 H45 N2 O3 P3 S2	686.206	7.375	NA	NA	NA	NA	NA	0	NA	NA	NA	other
7.397_386.1721	5.9136	0.1357	0.3648	DOR:NOR	C18:pos	(4e)-7-(4-hydroxy-3,5-dimethoxyphenyl)-1-(4-hydroxy-3-methoxyphenyl)-4-hepten-3-one	C22 H26 O6	386.172	7.397	NA	S4476436	HMDB0035405	8e-04	2.0987	3	Phenylpropanoids and polyketides	Diarylheptanoids	Linear diarylheptanoids	other
7.398_431.2301	3.8293	0.1775	0.3915	DOR:NOR	C18:pos	NA	C20 H39 N3 O P2 S	431.23	7.398	NA	NA	NA	NA	NA	0	NA	NA	NA	other
7.42_642.217	150.033	0.3816	0.4727	DOR:NOR	C18:pos	NA	C28 H45 N4 O3 P3 S2	642.217	7.42	NA	NA	NA	NA	NA	0	NA	NA	NA	other
7.421_250.118	0.0936	0.247	0.4068	DOR:NOR	C18:pos	NA	C11 H25 P3	250.118	7.421	NA	NA	NA	NA	NA	0	NA	NA	NA	other
7.429_374.2064	0.0232	0.0054	0.0722	DOR:NOR	C18:pos	NA	C18 H26 N6 O3	374.206	7.429	NA	NA	NA	NA	NA	0	NA	NA	NA	down
7.43_316.2034	0.0272	0.0055	0.0731	DOR:NOR	C18:pos	Cafestol	C20 H28 O3	316.203	7.43	C09066	M5863	NA	5e-04	1.4502	22	null	null	null	down
7.43_334.2137	0.0306	0.0032	0.0556	DOR:NOR	C18:pos	Pgj2	C20 H30 O4	334.214	7.43	C05957	S4444407	HMDB0002710	7e-04	2.1215	22	Lipids and lipid-like molecules	Fatty Acyls	Eicosanoids	down
7.43_369.2509	0.0316	0.0015	0.038	DOR:NOR	C18:pos	NA	C14 H36 N5 O4 P	369.251	7.43	NA	NA	NA	NA	NA	0	NA	NA	NA	down
7.437_473.333	0.3808	0.1608	0.3863	DOR:NOR	C18:pos	NA	NA	473.333	7.437	NA	NA	NA	NA	NA	0	NA	NA	NA	other
7.438_472.3298	0.3617	0.1532	0.385	DOR:NOR	C18:pos	NA	NA	472.33	7.438	NA	NA	NA	NA	NA	0	NA	NA	NA	other
7.439_464.3028	0.0208	0.0215	0.1439	DOR:NOR	C18:pos	NA	C23 H41 N6 O2 P	464.303	7.439	NA	NA	NA	NA	NA	0	NA	NA	NA	down
7.443_264.1336	0.2315	0.2599	0.4138	DOR:NOR	C18:pos	NA	C11 H16 N6 O2	264.134	7.443	NA	NA	NA	NA	NA	0	NA	NA	NA	other
7.443_508.3453	0.713	0.3614	0.4584	DOR:NOR	C18:pos	NA	C23 H48 N4 O8	508.345	7.443	NA	NA	NA	NA	NA	0	NA	NA	NA	other
7.445_260.1387	0.3452	0.3258	0.4414	DOR:NOR	C18:pos	NA	C12 H16 N6 O	260.139	7.445	NA	NA	NA	NA	NA	0	NA	NA	NA	other
7.453_182.0733	1.9007	0.0348	0.1825	DOR:NOR	C18:pos	3-hydroxyfluorene	C13 H10 O	182.073	7.453	null	M2849	HMDB0059802	-1e-04	-0.7877	4	Benzenoids	Fluorenes	null	up
7.453_232.1463	0.0449	0.2393	0.4048	DOR:NOR	C18:pos	(6z,10z)-6,10-dimethyl-3-methylene-3a,4,5,8,9,11a-hexahydrocyclodeca[b]furan-2(3h)-one	C15 H20 O2	232.146	7.453	NA	S4519051	HMDB0036688	1e-04	0.2711	28	Lipids and lipid-like molecules	Prenol lipids	Terpene lactones	other
7.453_290.149	0.1448	0.2156	0.4006	DOR:NOR	C18:pos	NA	C13 H18 N6 O2	290.149	7.453	NA	NA	NA	NA	NA	0	NA	NA	NA	other
7.46_319.0985	255.869	0.3754	0.4692	DOR:NOR	C18:pos	NA	C15 H17 N3 O3 S	319.099	7.46	NA	NA	NA	NA	NA	0	NA	NA	NA	other
7.462_368.217	0.0298	0.2162	0.4006	DOR:NOR	C18:pos	NA	C15 H32 N2 O8	368.217	7.462	NA	NA	NA	NA	NA	0	NA	NA	NA	other
7.464_384.212	0.0232	0.2251	0.4006	DOR:NOR	C18:pos	NA	C16 H28 N6 O5	384.212	7.464	NA	NA	NA	NA	NA	0	NA	NA	NA	other
7.467_347.2666	0.4153	0.302	0.4372	DOR:NOR	C18:pos	NA	C18 H37 N O5	347.267	7.467	NA	NA	NA	NA	NA	0	NA	NA	NA	other
7.468_171.0787	1.8264	0.1328	0.3602	DOR:NOR	C18:pos	NA	NA	171.079	7.468	NA	NA	NA	NA	NA	0	NA	NA	NA	other
7.468_363.2615	0.0372	0.1922	0.3953	DOR:NOR	C18:pos	NA	C18 H37 N O6	363.262	7.468	NA	NA	NA	NA	NA	0	NA	NA	NA	other
7.469_352.2223	0.3928	0.2995	0.4372	DOR:NOR	C18:pos	NA	C16 H28 N6 O3	352.222	7.469	NA	NA	NA	NA	NA	0	NA	NA	NA	other
7.47_379.2564	0.024	0.2079	0.4006	DOR:NOR	C18:pos	NA	C18 H37 N O7	379.256	7.47	NA	NA	NA	NA	NA	0	NA	NA	NA	other
7.472_262.074	2.5582	0.0776	0.2718	DOR:NOR	C18:pos	Indirubin	C16 H10 N2 O2	262.074	7.472	NA	M5885	NA	2e-04	0.7232	0	NA	NA	NA	other
7.483_349.224	0.007	0.2052	0.4002	DOR:NOR	C18:pos	NA	C14 H32 N5 O3 P	349.224	7.483	NA	NA	NA	NA	NA	0	NA	NA	NA	other
7.496_223.0552	2.0546	0.0841	0.2856	DOR:NOR	C18:pos	NA	C6 H16 N3 P3	223.055	7.496	NA	NA	NA	NA	NA	0	NA	NA	NA	other
7.498_262.0486	2.2057	0.0912	0.3027	DOR:NOR	C18:pos	Maclurin	C13 H10 O6	262.049	7.498	NA	S61520	HMDB0032644	-8e-04	-3.1968	1	Benzenoids	Benzene and substituted derivatives	Benzophenones	other
7.499_222.0565	2.0897	0.0822	0.2811	DOR:NOR	C18:pos	3475	C9 H18 S3	222.056	7.499	NA	S12678	HMDB0040243	6e-04	2.7295	4	Organosulfur compounds	Thioacetals	Dithioacetals	other
7.508_613.1727	2.4428	0.6322	0.6894	DOR:NOR	C18:pos	NA	C33 H33 N3 O3 P2 S	613.173	7.508	NA	NA	NA	NA	NA	0	NA	NA	NA	other
7.509_236.0718	1.8435	0.0975	0.3155	DOR:NOR	C18:pos	NA	NA	236.072	7.509	NA	NA	NA	NA	NA	0	NA	NA	NA	other
7.509_614.1768	0.7536	0.9138	0.9279	DOR:NOR	C18:pos	NA	NA	614.177	7.509	NA	NA	NA	NA	NA	0	NA	NA	NA	other
7.509_615.168	0.493	0.6842	0.7335	DOR:NOR	C18:pos	NA	C34 H26 N5 O5 P	615.168	7.509	NA	NA	NA	NA	NA	0	NA	NA	NA	other
7.51_683.1543	0.5514	0.9683	0.9716	DOR:NOR	C18:pos	NA	C36 H30 N O11 P	683.154	7.51	NA	NA	NA	NA	NA	0	NA	NA	NA	other
7.518_408.1713	53.1488	0.1386	0.3689	DOR:NOR	C18:pos	Tamsulosin	C20 H28 N2 O5 S	408.171	7.518	NA	S114457	HMDB0014844	6e-04	1.5295	1	Benzenoids	Benzene and substituted derivatives	Phenethylamines	other
7.532_153.079	9.4241	0.2243	0.4006	DOR:NOR	C18:pos	Dopamine	C8 H11 N O2	153.079	7.532	C03758	S661	HMDB0000073	0	-0.1176	3	Benzenoids	Phenols	Benzenediols	other
7.532_209.1414	23.3094	0.271	0.421	DOR:NOR	C18:pos	NA	C12 H19 N O2	209.141	7.532	NA	NA	NA	NA	NA	0	NA	NA	NA	other
7.546_287.2822	1.4967	0.7056	0.7522	DOR:NOR	C18:pos	NA	C17 H37 N O2	287.282	7.546	NA	NA	NA	NA	NA	0	NA	NA	NA	other
7.564_273.2664	2.2812	0.0764	0.2695	DOR:NOR	C18:pos	NA	C16 H35 N O2	273.266	7.564	NA	NA	NA	NA	NA	0	NA	NA	NA	other
7.572_273.1213	1.65	0.105	0.326	DOR:NOR	C18:pos	(3s)-3-{[(2e)-4-carboxy-2-butenoyl]oxy}-4-(trimethylammonio)butanoate	C12 H19 N O6	273.121	7.572	NA	S30776696	HMDB0013129	-1e-04	-0.2872	1	Organic acids and derivatives	Hydroxy acids and derivatives	Beta hydroxy acids and derivatives	other
7.577_317.2923	15.02	0.3951	0.4811	DOR:NOR	C18:pos	2-amino-1,3,4-octadecanetriol	C18 H39 N O3	317.292	7.577	C12144	M545	NA	7e-04	2.0607	1	Organic nitrogen compounds	Organonitrogen compounds	Amines	other
7.581_700.2209	10.2471	0.1429	0.3734	DOR:NOR	C18:pos	NA	C35 H47 N2 O3 P3 S2	700.221	7.581	NA	NA	NA	NA	NA	0	NA	NA	NA	other
7.586_152.1202	0.4406	0.0941	0.3082	DOR:NOR	C18:pos	Citral	C10 H16 O	152.12	7.586	NA	S553578	HMDB0035078	-1e-04	-0.8156	79	Lipids and lipid-like molecules	Prenol lipids	Monoterpenoids	other
7.59_473.333	0.3488	0.1402	0.3709	DOR:NOR	C18:pos	NA	C23 H48 N5 O P S	473.333	7.59	NA	NA	NA	NA	NA	0	NA	NA	NA	other
7.594_361.3184	48.2826	0.4215	0.5007	DOR:NOR	C18:pos	NA	C20 H43 N O4	361.318	7.594	NA	NA	NA	NA	NA	0	NA	NA	NA	other
7.598_271.2511	1.4455	0.297	0.4356	DOR:NOR	C18:pos	NA	C16 H33 N O2	271.251	7.598	NA	NA	NA	NA	NA	0	NA	NA	NA	other
7.603_243.256	2.7566	0.3235	0.4414	DOR:NOR	C18:pos	NA	C15 H33 N O	243.256	7.603	NA	NA	NA	NA	NA	0	NA	NA	NA	other
7.604_405.3446	107.141	0.3523	0.4522	DOR:NOR	C18:pos	NA	C22 H47 N O5	405.345	7.604	NA	NA	NA	NA	NA	0	NA	NA	NA	other
7.609_287.2822	1.4782	0.641	0.6964	DOR:NOR	C18:pos	NA	C17 H37 N O2	287.282	7.609	NA	NA	NA	NA	NA	0	NA	NA	NA	other
7.621_213.2457	1.9271	0.1143	0.3399	DOR:NOR	C18:pos	NA	C14 H31 N	213.246	7.621	NA	NA	NA	NA	NA	0	NA	NA	NA	other
7.621_471.3526	20.7933	0.322	0.4414	DOR:NOR	C18:pos	NA	C25 H51 N3 O P2	471.353	7.621	NA	NA	NA	NA	NA	0	NA	NA	NA	other
7.622_668.1968	42.4396	0.2656	0.4175	DOR:NOR	C18:pos	NA	C32 H36 N4 O8 S2	668.197	7.622	NA	NA	NA	NA	NA	0	NA	NA	NA	other
7.623_348.1907	0.0651	0.0848	0.2869	DOR:NOR	C18:pos	NA	C17 H35 O P3	348.191	7.623	NA	NA	NA	NA	NA	0	NA	NA	NA	other
7.626_251.1155	10.5546	0.2485	0.4068	DOR:NOR	C18:pos	NA	C13 H17 N O4	251.115	7.626	NA	NA	NA	NA	NA	0	NA	NA	NA	other
7.634_449.3709	223.844	0.3223	0.4414	DOR:NOR	C18:pos	NA	C25 H47 N5 O2	449.371	7.634	NA	NA	NA	NA	NA	0	NA	NA	NA	other
7.638_349.224	0.0098	0.2384	0.4048	DOR:NOR	C18:pos	NA	C14 H32 N5 O3 P	349.224	7.638	NA	NA	NA	NA	NA	0	NA	NA	NA	other
7.64_236.0718	1.9357	0.0673	0.2509	DOR:NOR	C18:pos	NA	NA	236.072	7.64	NA	NA	NA	NA	NA	0	NA	NA	NA	other
7.649_241.2037	1.5033	0.6406	0.6963	DOR:NOR	C18:pos	NA	C14 H27 N O2	241.204	7.649	NA	NA	NA	NA	NA	0	NA	NA	NA	other
7.649_330.219	0.0404	0.0381	0.1909	DOR:NOR	C18:pos	Hydroxyprogesterone	C21 H30 O3	330.219	7.649	C01176	S6002	HMDB0000374	5e-04	1.6105	18	Lipids and lipid-like molecules	Steroids and steroid derivatives	Pregnane steroids	down
7.651_248.1388	0.1207	0.1891	0.3928	DOR:NOR	C18:pos	NA	C11 H16 N6 O	248.139	7.651	NA	NA	NA	NA	NA	0	NA	NA	NA	other
7.652_333.2871	20.2558	0.1901	0.3939	DOR:NOR	C18:pos	NA	C18 H39 N O4	333.287	7.652	NA	NA	NA	NA	NA	0	NA	NA	NA	other
7.655_222.0565	2.288	0.0498	0.2184	DOR:NOR	C18:pos	3475	C9 H18 S3	222.056	7.655	NA	S12678	HMDB0040243	6e-04	2.7743	4	Organosulfur compounds	Thioacetals	Dithioacetals	up
7.655_229.2405	2.5352	0.2095	0.4006	DOR:NOR	C18:pos	NA	C14 H31 N O	229.24	7.655	NA	NA	NA	NA	NA	0	NA	NA	NA	other
7.661_493.3974	79.5841	0.3473	0.4502	DOR:NOR	C18:pos	NA	C27 H51 N5 O3	493.397	7.661	NA	NA	NA	NA	NA	0	NA	NA	NA	other
7.663_289.2612	1.4343	0.4648	0.5414	DOR:NOR	C18:pos	NA	C16 H35 N O3	289.261	7.663	NA	NA	NA	NA	NA	0	NA	NA	NA	other
7.665_257.2714	2.224	0.1192	0.344	DOR:NOR	C18:pos	NA	C16 H35 N O	257.271	7.665	NA	NA	NA	NA	NA	0	NA	NA	NA	other
7.668_192.1153	1.5525	0.0104	0.0958	DOR:NOR	C18:pos	2058	C12 H16 O2	192.115	7.668	NA	S6925	HMDB0033380	-2e-04	-1.1145	23	Benzenoids	Benzene and substituted derivatives	Benzoic acids and derivatives	up
7.68_199.2301	2.0854	0.1688	0.389	DOR:NOR	C18:pos	NA	C13 H29 N	199.23	7.68	NA	NA	NA	NA	NA	0	NA	NA	NA	other
7.689_212.1412	22.8083	0.3275	0.4417	DOR:NOR	C18:pos	Mfcd18781916	C12 H20 O3	212.141	7.689	NA	S96397	HMDB0033601	1e-04	0.3095	5	Lipids and lipid-like molecules	Lineolic acids and derivatives	Jasmonic acids	other
7.69_180.115	6.5713	0.5063	0.578	DOR:NOR	C18:pos	3-bha	C11 H16 O2	180.115	7.69	NA	S8145	HMDB0059925	0	-0.0101	10	Benzenoids	Phenols	Methoxyphenols	other
7.69_284.2824	2.658	0.3698	0.4635	DOR:NOR	C18:pos	NA	C17 H36 N2 O	284.282	7.69	NA	NA	NA	NA	NA	0	NA	NA	NA	other
7.691_162.0682	1.4547	0.0415	0.195	DOR:NOR	C18:pos	Safrole	C10 H10 O2	162.068	7.691	NA	S13848731	HMDB0033591	-1e-04	-0.6641	24	Organoheterocyclic compounds	Benzodioxoles	null	up
7.694_266.0917	0.0914	0.5548	0.6215	DOR:NOR	C18:pos	NA	C10 H19 O6 P	266.092	7.694	NA	NA	NA	NA	NA	0	NA	NA	NA	other
7.702_270.267	6.1554	0.6438	0.6979	DOR:NOR	C18:pos	NA	C16 H34 N2 O	270.267	7.702	NA	NA	NA	NA	NA	0	NA	NA	NA	other
7.703_414.2038	7.7132	0.2191	0.4006	DOR:NOR	C18:pos	Inspra	C24 H30 O6	414.204	7.703	NA	S10203511	HMDB0014838	4e-04	1.0017	3	Lipids and lipid-like molecules	Steroids and steroid derivatives	Steroid lactones	other
7.704_220.1463	0.3585	0.4391	0.5167	DOR:NOR	C18:pos	Dk3970000	C14 H20 O2	220.146	7.704	NA	S12336	HMDB0013817	0	-0.054	22	Lipids and lipid-like molecules	Prenol lipids	Monoterpenoids	other
7.712_160.089	2.522	0.1139	0.3397	DOR:NOR	C18:pos	2-phenyl-4-pentenal	C11 H12 O	160.089	7.712	NA	S489034	HMDB0035207	-1e-04	-0.8717	3	Benzenoids	Benzene and substituted derivatives	Phenylacetaldehydes	other
7.712_202.0995	2.6147	0.0906	0.3015	DOR:NOR	C18:pos	1-(2,2-dimethylchromen-6-yl)ethan-1-one	C13 H14 O2	202.1	7.712	NA	S154177	HMDB0030816	-1e-04	-0.4644	3	Organoheterocyclic compounds	Benzopyrans	1-benzopyrans	other
7.713_185.2146	2.0047	0.1126	0.3376	DOR:NOR	C18:pos	NA	C12 H27 N	185.215	7.713	NA	NA	NA	NA	NA	0	NA	NA	NA	other
7.713_224.139	0.1431	0.2056	0.4002	DOR:NOR	C18:pos	NA	C7 H21 N4 O2 P	224.139	7.713	NA	NA	NA	NA	NA	0	NA	NA	NA	other
7.715_164.0475	2.8086	0.1172	0.3429	DOR:NOR	C18:pos	(e)-p-coumaric acid	C9 H8 O3	164.048	7.715	C00811	S553148	HMDB0002035	-2e-04	-0.9413	18	Phenylpropanoids and polyketides	Cinnamic acids and derivatives	Hydroxycinnamic acids and derivatives	other
7.716_276.1722	2.7571	0.0719	0.2589	DOR:NOR	C18:pos	Cyclandelate	C17 H24 O3	276.172	7.716	NA	S2790	HMDB0015586	3e-04	1.1523	7	Benzenoids	Benzene and substituted derivatives	null	other
7.718_287.2821	1.4164	0.6989	0.7468	DOR:NOR	C18:pos	NA	C17 H37 N O2	287.282	7.718	NA	NA	NA	NA	NA	0	NA	NA	NA	other
7.718_316.1645	3.1209	0.0648	0.248	DOR:NOR	C18:pos	NA	C14 H24 N2 O6	316.164	7.718	NA	NA	NA	NA	NA	0	NA	NA	NA	other
7.722_331.308	1.8135	0.4658	0.5423	DOR:NOR	C18:pos	NA	C19 H41 N O3	331.308	7.722	NA	NA	NA	NA	NA	0	NA	NA	NA	other
7.725_245.1448	0.041	0.0512	0.2188	DOR:NOR	C18:pos	S-3-oxodecanoyl cysteamine	C12 H23 N O2 S	245.145	7.725	NA	S30778477	HMDB0059773	1e-04	0.4273	1	Lipids and lipid-like molecules	Fatty Acyls	Fatty acyl thioesters	other
7.734_213.2456	2.628	0.2146	0.4006	DOR:NOR	C18:pos	NA	C14 H31 N	213.246	7.734	NA	NA	NA	NA	NA	0	NA	NA	NA	other
7.734_300.2772	1.5814	0.4186	0.4985	DOR:NOR	C18:pos	NA	C17 H36 N2 O2	300.277	7.734	NA	NA	NA	NA	NA	0	NA	NA	NA	other
7.74_256.1435	8.1713	0.2736	0.4226	DOR:NOR	C18:pos	NA	C12 H20 N2 O4	256.144	7.74	NA	NA	NA	NA	NA	0	NA	NA	NA	other
7.74_268.1647	1.9404	0.7118	0.7582	DOR:NOR	C18:pos	NA	C11 H20 N6 O2	268.165	7.74	NA	NA	NA	NA	NA	0	NA	NA	NA	other
7.746_192.1153	1.4738	0.0321	0.1744	DOR:NOR	C18:pos	2058	C12 H16 O2	192.115	7.746	NA	S6925	HMDB0033380	-3e-04	-1.3227	23	Benzenoids	Benzene and substituted derivatives	Benzoic acids and derivatives	up
7.754_331.2135	0.2352	0.1713	0.3913	DOR:NOR	C18:pos	NA	C14 H30 N5 O2 P	331.214	7.754	NA	NA	NA	NA	NA	0	NA	NA	NA	other
7.757_232.1463	0.0386	0.2522	0.4085	DOR:NOR	C18:pos	(6z,10z)-6,10-dimethyl-3-methylene-3a,4,5,8,9,11a-hexahydrocyclodeca[b]furan-2(3h)-one	C15 H20 O2	232.146	7.757	NA	S4519051	HMDB0036688	0	0.1804	28	Lipids and lipid-like molecules	Prenol lipids	Terpene lactones	other
7.758_190.1359	1.9403	0.066	0.2509	DOR:NOR	C18:pos	3420	C13 H18 O	190.136	7.758	NA	S4517997	HMDB0013804	-1e-04	-0.5736	6	Organic oxygen compounds	Organooxygen compounds	Carbonyl compounds	other
7.779_408.171	66.4031	0.3374	0.4471	DOR:NOR	C18:pos	Tamsulosin	C20 H28 N2 O5 S	408.171	7.779	NA	S114457	HMDB0014844	9e-04	2.2024	1	Benzenoids	Benzene and substituted derivatives	Phenethylamines	other
7.786_294.0185	1.4779	0.0335	0.179	DOR:NOR	C18:pos	NA	C13 H10 O6 S	294.019	7.786	NA	NA	NA	NA	NA	0	NA	NA	NA	up
7.787_120.0212	1.5966	0.0008	0.0285	DOR:NOR	C18:pos	NA	C7 H4 O2	120.021	7.787	NA	NA	NA	NA	NA	0	NA	NA	NA	up
7.787_166.0632	1.5744	0.0056	0.0731	DOR:NOR	C18:pos	Apocynin	C9 H10 O3	166.063	7.787	C11380	M5847	NA	-2e-04	-1.2186	41	null	null	null	up
7.787_180.0788	1.661	0.0179	0.1301	DOR:NOR	C18:pos	Propylparaben	C10 H12 O3	180.079	7.787	NA	S6907	HMDB0032574	-2e-04	-1.1062	34	Benzenoids	Benzene and substituted derivatives	Benzoic acids and derivatives	up
7.787_194.0946	1.5698	0.0127	0.108	DOR:NOR	C18:pos	Butylparaben	C11 H14 O3	194.095	7.787	NA	S6916	HMDB0032575	-3e-04	-1.486	35	Benzenoids	Benzene and substituted derivatives	Benzoic acids and derivatives	up
7.787_94.042	1.6114	0.0171	0.1252	DOR:NOR	C18:pos	Phenol	C6 H6 O	94.042	7.787	NA	S971	HMDB0000228	-1e-04	-1.0002	1	Benzenoids	Phenols	1-hydroxy-4-unsubstituted benzenoids	up
7.793_275.1856	0.5566	0.3899	0.4768	DOR:NOR	C18:pos	NA	C12 H25 N3 O4	275.186	7.793	NA	NA	NA	NA	NA	0	NA	NA	NA	other
7.805_312.2082	0.0404	0.0077	0.0849	DOR:NOR	C18:pos	Levonorgestrel	C21 H28 O2	312.208	7.805	NA	S12560	HMDB0014511	7e-04	2.3879	5	Lipids and lipid-like molecules	Steroids and steroid derivatives	Estrane steroids	down
7.809_258.1827	3.0945	0.1238	0.3494	DOR:NOR	C18:pos	2376	C14 H26 O4	258.183	7.809	NA	S7758	HMDB0040429	4e-04	1.5869	5	Lipids and lipid-like molecules	Fatty Acyls	Fatty acid esters	other
7.812_272.1984	2.7308	0.1828	0.3915	DOR:NOR	C18:pos	4-(5,6-dihydroxy-6-methyl-1-hepten-2-yl)-1-methyl-1,2-cyclohexanediol	C15 H28 O4	272.198	7.812	NA	S35014049	HMDB0035918	3e-04	1.2827	1	Lipids and lipid-like molecules	Prenol lipids	Sesquiterpenoids	other
7.813_266.149	2.7339	0.1775	0.3915	DOR:NOR	C18:pos	NA	C11 H18 N6 O2	266.149	7.813	NA	NA	NA	NA	NA	0	NA	NA	NA	other
7.821_243.2561	1.603	0.6892	0.7381	DOR:NOR	C18:pos	NA	C15 H33 N O	243.256	7.821	NA	NA	NA	NA	NA	0	NA	NA	NA	other
7.835_194.1309	0.3265	0.4044	0.4893	DOR:NOR	C18:pos	Hexylresorcinol	C12 H18 O2	194.131	7.835	NA	S21106121	HMDB0032567	-2e-04	-1.2683	18	Benzenoids	Benzene and substituted derivatives	Phenols and derivatives	other
7.836_319.2133	0.4332	0.3294	0.443	DOR:NOR	C18:pos	2-hydroxy-3-isobutyl-9,10-dimethoxy-1,2,3,4,6,7-hexahydro-11bh-benzo(a)quinolizine	C19 H29 N O3	319.213	7.836	NA	S110379	HMDB0060578	0.0014	4.4224	3	Organoheterocyclic compounds	Tetrahydroisoquinolines	null	other
7.842_285.3027	4.2734	0.279	0.4268	DOR:NOR	C18:pos	NA	C18 H39 N O	285.303	7.842	NA	NA	NA	NA	NA	0	NA	NA	NA	other
7.845_290.1852	1.6659	0.5708	0.637	DOR:NOR	C18:pos	NA	C14 H22 N6 O	290.185	7.845	NA	NA	NA	NA	NA	0	NA	NA	NA	other
7.852_250.1544	0.052	0.1524	0.385	DOR:NOR	C18:pos	NA	C11 H18 N6 O	250.154	7.852	NA	NA	NA	NA	NA	0	NA	NA	NA	other
7.854_303.2768	5.2628	0.235	0.4039	DOR:NOR	C18:pos	NA	C17 H37 N O3	303.277	7.854	NA	NA	NA	NA	NA	0	NA	NA	NA	other
7.869_252.1723	1.31	0.3226	0.4414	DOR:NOR	C18:pos	6-myoporol	C15 H24 O3	252.172	7.869	NA	S46689	HMDB0035729	2e-04	0.9594	17	Lipids and lipid-like molecules	Fatty Acyls	Fatty alcohols	other
7.87_390.2016	0.0247	0.212	0.4006	DOR:NOR	C18:pos	NA	C18 H26 N6 O4	390.202	7.87	NA	NA	NA	NA	NA	0	NA	NA	NA	other
7.871_260.1387	0.5983	0.5992	0.6596	DOR:NOR	C18:pos	NA	C12 H16 N6 O	260.139	7.871	NA	NA	NA	NA	NA	0	NA	NA	NA	other
7.871_350.2086	0.0826	0.28	0.4275	DOR:NOR	C18:pos	Andrographolide	C20 H30 O5	350.209	7.871	C20214	M6152	NA	7e-04	1.9166	19	null	null	null	other
7.874_204.1516	0.0212	0.1982	0.396	DOR:NOR	C18:pos	(z)-?-amylcinnamyl alcohol	C14 H20 O	204.152	7.874	NA	S20122674	HMDB0036170	-2e-04	-1.0146	5	Phenylpropanoids and polyketides	Cinnamyl alcohols	null	other
7.879_287.2821	1.4817	0.6337	0.6903	DOR:NOR	C18:pos	NA	C17 H37 N O2	287.282	7.879	NA	NA	NA	NA	NA	0	NA	NA	NA	other
7.887_331.308	1.6174	0.3849	0.4739	DOR:NOR	C18:pos	NA	C19 H41 N O3	331.308	7.887	NA	NA	NA	NA	NA	0	NA	NA	NA	other
7.892_303.2921	5.3366	0.052	0.2201	DOR:NOR	C18:pos	NA	C21 H37 N	303.292	7.892	NA	NA	NA	NA	NA	0	NA	NA	NA	other
7.909_285.2662	1.3381	0.5704	0.6369	DOR:NOR	C18:pos	NA	C17 H35 N O2	285.266	7.909	NA	NA	NA	NA	NA	0	NA	NA	NA	other
7.911_110.1097	1.5596	0.0623	0.2442	DOR:NOR	C18:pos	1733342	C8 H14	110.11	7.911	NA	S12451	HMDB0061902	-1e-04	-0.9215	5	Hydrocarbons	Unsaturated hydrocarbons	Branched unsaturated hydrocarbons	other
7.915_198.1621	1.9547	0.0751	0.2659	DOR:NOR	C18:pos	4253	C12 H22 O2	198.162	7.915	NA	S7846	HMDB0029585	-1e-04	-0.6996	30	Lipids and lipid-like molecules	Fatty Acyls	Fatty acid esters	other
7.92_134.0732	5.5385	0.1173	0.3429	DOR:NOR	C18:pos	4-ethylbenzaldehyde	C9 H10 O	134.073	7.92	null	M6570	HMDB0032024	0	-0.2319	16	Benzenoids	Benzene and substituted derivatives	Benzoyl derivatives	other
7.92_148.089	7.671	0.1633	0.3874	DOR:NOR	C18:pos	Cuminaldehyde	C10 H12 O	148.089	7.92	C06577	M359	NA	-1e-04	-0.9966	13	Lipids and lipid-like molecules	Prenol lipids	Monoterpenoids	other
7.922_850.387	77.7206	0.1987	0.396	DOR:NOR	C18:pos	NA	C45 H58 N2 O14	850.387	7.922	NA	NA	NA	NA	NA	0	NA	NA	NA	other
7.922_90.0469	2.4988	0.147	0.38	DOR:NOR	C18:pos	NA	C7 H6	90.0469	7.922	NA	NA	NA	NA	NA	0	NA	NA	NA	other
7.923_118.0782	8.0303	0.2087	0.4006	DOR:NOR	C18:pos	Indane	C9 H10	118.078	7.923	NA	S9903	HMDB0059837	1e-04	0.434	2	Benzenoids	Indanes	null	other
7.923_280.1307	10.1511	0.1973	0.396	DOR:NOR	C18:pos	(2e,4e)-5-[1-hydroxy-2-(hydroxymethyl)-6,6-dimethyl-4-oxo-2-cyclohexen-1-yl]-3-methyl-2,4-pentadienoic acid	C15 H20 O5	280.131	7.923	NA	S35014093	HMDB0036094	4e-04	1.4172	10	Lipids and lipid-like molecules	Prenol lipids	Sesquiterpenoids	other
7.923_414.2038	9.362	0.1847	0.3917	DOR:NOR	C18:pos	Inspra	C24 H30 O6	414.204	7.923	NA	S10203511	HMDB0014838	4e-04	1.0618	3	Lipids and lipid-like molecules	Steroids and steroid derivatives	Steroid lactones	other
7.923_499.1419	15.0997	0.1975	0.396	DOR:NOR	C18:pos	NA	C23 H26 N5 O4 P S	499.142	7.923	NA	NA	NA	NA	NA	0	NA	NA	NA	other
7.923_514.1286	12.5841	0.1618	0.3863	DOR:NOR	C18:pos	NA	C28 H23 N2 O6 P	514.129	7.923	NA	NA	NA	NA	NA	0	NA	NA	NA	other
7.923_845.4316	55.0571	0.1934	0.3958	DOR:NOR	C18:pos	NA	C49 H60 N5 O6 P	845.432	7.923	NA	NA	NA	NA	NA	0	NA	NA	NA	other
7.924_445.2458	7.8027	0.1838	0.3915	DOR:NOR	C18:pos	NA	C25 H35 N O6	445.246	7.924	NA	NA	NA	NA	NA	0	NA	NA	NA	other
7.924_473.2773	8.4612	0.1823	0.3915	DOR:NOR	C18:pos	NA	C21 H40 N5 O5 P	473.277	7.924	NA	NA	NA	NA	NA	0	NA	NA	NA	other
7.924_482.2413	6.9443	0.2017	0.3982	DOR:NOR	C18:pos	2-hydroxy-3-(phosphonooxy)propyl (4z,7z,10z,13z,16z,19z)-4,7,10,13,16,19-docosahexaenoate	C25 H39 O7 P	482.241	7.924	NA	S74851457	HMDB0114755	0.002	4.2402	2	Lipids and lipid-like molecules	Glycerophospholipids	Glycerophosphates	other
7.924_489.2723	5.1049	0.1886	0.3928	DOR:NOR	C18:pos	NA	C31 H39 N O2 S	489.272	7.924	NA	NA	NA	NA	NA	0	NA	NA	NA	other
7.925_459.2617	4.8744	0.1715	0.3913	DOR:NOR	C18:pos	NA	C26 H37 N O6	459.262	7.925	NA	NA	NA	NA	NA	0	NA	NA	NA	other
7.929_171.1624	2.8273	0.0539	0.2247	DOR:NOR	C18:pos	Mfcd00130070	C10 H21 N O	171.162	7.929	NA	S58789	HMDB0036195	-1e-04	-0.5521	1	Lipids and lipid-like molecules	Fatty Acyls	Fatty amides	other
7.932_271.2145	3.1312	0.2541	0.4101	DOR:NOR	C18:pos	N-tridecanoylglycine	C15 H29 N O3	271.214	7.932	NA	S21513291	HMDB0013317	3e-04	0.9289	1	Organic acids and derivatives	Carboxylic acids and derivatives	Amino acids, peptides, and analogues	other
7.935_366.2394	0.0374	0.1425	0.3734	DOR:NOR	C18:pos	5a-tetrahydrocortisol	C21 H34 O5	366.239	7.935	NA	S83726	HMDB0000526	0.0012	3.3695	3	Lipids and lipid-like molecules	Steroids and steroid derivatives	Hydroxysteroids	other
7.947_326.2088	0.0213	0.247	0.4068	DOR:NOR	C18:pos	2,4,9a-trimethoxy-3,4a,5-trimethyl-2,4,4a,5,6,7,8,8a,9,9a-decahydronaphtho[2,3-b]furan-6-ol	C18 H30 O5	326.209	7.947	NA	S35013420	HMDB0031963	5e-04	1.6465	1	Organoheterocyclic compounds	Naphthofurans	null	other
7.949_402.2373	0.0379	0.0085	0.0868	DOR:NOR	C18:pos	NA	C21 H39 O3 P S	402.237	7.949	NA	NA	NA	NA	NA	0	NA	NA	NA	down
7.956_243.2561	1.6922	0.6066	0.6652	DOR:NOR	C18:pos	NA	C15 H33 N O	243.256	7.956	NA	NA	NA	NA	NA	0	NA	NA	NA	other
7.957_303.2769	4.8355	0.2464	0.4068	DOR:NOR	C18:pos	NA	C17 H37 N O3	303.277	7.957	NA	NA	NA	NA	NA	0	NA	NA	NA	other
7.961_391.2466	2.2926	0.2369	0.4044	DOR:NOR	C18:pos	NA	C21 H33 N3 O4	391.247	7.961	NA	NA	NA	NA	NA	0	NA	NA	NA	other
7.969_392.217	0.0061	0.2056	0.4002	DOR:NOR	C18:pos	NA	C18 H28 N6 O4	392.217	7.969	NA	NA	NA	NA	NA	0	NA	NA	NA	other
7.969_413.3499	38.9034	0.3468	0.4502	DOR:NOR	C18:pos	O-heptadecanoylcarnitine	C24 H47 N O4	413.35	7.969	NA	S35015987	HMDB0006210	6e-04	1.5082	1	Lipids and lipid-like molecules	Fatty Acyls	Fatty acid esters	other
7.971_370.2351	0.012	0.2106	0.4006	DOR:NOR	C18:pos	Thromboxane b2	C20 H34 O6	370.235	7.971	null	M4408	HMDB0003252	4e-04	1.1651	5	Lipids and lipid-like molecules	Fatty Acyls	Eicosanoids	other
7.972_336.2296	0.039	0.2101	0.4006	DOR:NOR	C18:pos	Prostaglandin b1	C20 H32 O4	336.23	7.972	C00959	M563	NA	5e-04	1.5114	42	Lipids and lipid-like molecules	Fatty Acyls	Eicosanoids	other
7.973_358.1738	1.4533	0.057	0.2341	DOR:NOR	C18:pos	NA	C18 H33 O P3	358.174	7.973	NA	NA	NA	NA	NA	0	NA	NA	NA	other
7.981_308.1982	0.4342	0.6476	0.7012	DOR:NOR	C18:pos	5-o-methyl embelin	C18 H28 O4	308.198	7.981	NA	S149914	HMDB0040867	6e-04	1.925	8	Organooxygen compounds	Carbonyl compounds	Ketones	other
7.99_352.2245	0.017	0.1561	0.3863	DOR:NOR	C18:pos	(-)-prostaglandin e2	C20 H32 O5	352.224	7.99	C00584	S4444059	HMDB0001220	4e-04	1.2718	29	Lipids and lipid-like molecules	Fatty Acyls	Eicosanoids	other
7.994_329.2562	0.0469	0.1174	0.3429	DOR:NOR	C18:pos	O-(4,8-dimethylnonanoyl)carnitine	C18 H35 N O4	329.256	7.994	NA	S27471335	HMDB0006202	4e-04	1.1521	2	Lipids and lipid-like molecules	Fatty Acyls	Fatty acid esters	other
8.003_252.1361	0.0606	0.2887	0.4312	DOR:NOR	C18:pos	2,3-dimethoxy-5-methyl-6-(3-methyl-2-buten-1-yl)-1,4-benzenediol	C14 H20 O4	252.136	8.003	NA	S394877	HMDB0059661	1e-04	0.4157	3	Lipids and lipid-like molecules	Prenol lipids	Quinone and hydroquinone lipids	other
8.008_255.2196	1.9796	0.3518	0.4522	DOR:NOR	C18:pos	NA	C15 H29 N O2	255.22	8.008	NA	NA	NA	NA	NA	0	NA	NA	NA	other
8.008_309.2274	1.933	0.4384	0.5166	DOR:NOR	C18:pos	NA	C13 H31 N3 O5	309.227	8.008	NA	NA	NA	NA	NA	0	NA	NA	NA	other
8.019_224.1388	19.2002	0.2611	0.4146	DOR:NOR	C18:pos	NA	C9 H16 N6 O	224.139	8.019	NA	NA	NA	NA	NA	0	NA	NA	NA	other
8.022_250.1204	0.7186	0.9217	0.9341	DOR:NOR	C18:pos	Trolox	C14 H18 O4	250.12	8.022	NA	S37117	HMDB0038804	1e-04	0.3591	7	Organoheterocyclic compounds	Benzopyrans	1-benzopyrans	other
8.031_390.2016	0.0228	0.2128	0.4006	DOR:NOR	C18:pos	NA	C20 H31 N4 P S	390.202	8.031	NA	NA	NA	NA	NA	0	NA	NA	NA	other
8.035_315.2185	0.9423	0.6366	0.6929	DOR:NOR	C18:pos	NA	C14 H30 N5 O P	315.219	8.035	NA	NA	NA	NA	NA	0	NA	NA	NA	other
8.054_366.2396	0.0537	0.1434	0.3734	DOR:NOR	C18:pos	5a-tetrahydrocortisol	C21 H34 O5	366.24	8.054	NA	S83726	HMDB0000526	0.0011	2.8778	3	Lipids and lipid-like molecules	Steroids and steroid derivatives	Hydroxysteroids	other
8.059_335.2446	2.1687	0.0024	0.0466	DOR:NOR	C18:pos	NA	C14 H34 N5 O2 P	335.245	8.059	NA	NA	NA	NA	NA	0	NA	NA	NA	up
8.062_424.2433	0.0173	0.219	0.4006	DOR:NOR	C18:pos	NA	C19 H32 N6 O5	424.243	8.062	NA	NA	NA	NA	NA	0	NA	NA	NA	other
8.064_303.2185	2.0944	0.0082	0.0859	DOR:NOR	C18:pos	NA	C13 H30 N5 O P	303.219	8.064	NA	NA	NA	NA	NA	0	NA	NA	NA	up
8.069_332.1982	0.0272	0.1921	0.3953	DOR:NOR	C18:pos	(5xi)-11,12-dihydroxyabieta-8(14),9(11),12-trien-20-oic acid	C20 H28 O4	332.198	8.069	NA	S400886	HMDB0002358	5e-04	1.5496	14	Lipids and lipid-like molecules	Prenol lipids	Diterpenoids	other
8.073_250.1204	1.1557	0.576	0.641	DOR:NOR	C18:pos	Trolox	C14 H18 O4	250.12	8.073	NA	S37117	HMDB0038804	1e-04	0.3591	7	Organoheterocyclic compounds	Benzopyrans	1-benzopyrans	other
8.074_265.1309	8.1887	0.2677	0.4189	DOR:NOR	C18:pos	NA	C14 H19 N O4	265.131	8.074	NA	NA	NA	NA	NA	0	NA	NA	NA	other
8.076_406.2328	0.0682	0.3438	0.4498	DOR:NOR	C18:pos	NA	C19 H30 N6 O4	406.233	8.076	NA	NA	NA	NA	NA	0	NA	NA	NA	other
8.079_310.1974	0.1108	0.3112	0.4403	DOR:NOR	C18:pos	NA	C10 H26 N6 O5	310.197	8.079	NA	NA	NA	NA	NA	0	NA	NA	NA	other
8.094_315.3137	1.4745	0.6825	0.732	DOR:NOR	C18:pos	NA	C19 H41 N O2	315.314	8.094	NA	NA	NA	NA	NA	0	NA	NA	NA	other
8.098_242.1282	1.4231	0.3892	0.4767	DOR:NOR	C18:pos	NA	C12 H14 N6	242.128	8.098	NA	NA	NA	NA	NA	0	NA	NA	NA	other
8.099_250.1544	0.0385	0.1919	0.3953	DOR:NOR	C18:pos	NA	C11 H18 N6 O	250.154	8.099	NA	NA	NA	NA	NA	0	NA	NA	NA	other
8.1_196.1466	0.3291	0.1858	0.3922	DOR:NOR	C18:pos	(.+/-.)-linalyl acetate	C12 H20 O2	196.147	8.1	NA	S13850082	HMDB0039522	-2e-04	-1.175	23	Lipids and lipid-like molecules	Prenol lipids	Monoterpenoids	other
8.108_92.0627	2.8584	0.4142	0.4973	DOR:NOR	C18:pos	Toluene	C7 H8	92.0627	8.108	C01455	S1108	HMDB0034168	-1e-04	-0.6018	1	Benzenoids	Benzene and substituted derivatives	Toluenes	other
8.109_118.0782	3.4002	0.2149	0.4006	DOR:NOR	C18:pos	Indane	C9 H10	118.078	8.109	NA	S9903	HMDB0059837	0	0.3717	2	Benzenoids	Indanes	null	other
8.11_222.1984	42.726	0.1939	0.396	DOR:NOR	C18:pos	(2e,6e)-farnesol	C15 H26 O	222.198	8.11	C06081	S392816	HMDB0004305	0	0.0594	44	Lipids and lipid-like molecules	Prenol lipids	Sesquiterpenoids	other
8.11_331.3234	25.3643	0.5634	0.6296	DOR:NOR	C18:pos	NA	C23 H41 N	331.323	8.11	NA	NA	NA	NA	NA	0	NA	NA	NA	other
8.11_90.0469	2.6309	0.4691	0.5451	DOR:NOR	C18:pos	NA	C7 H6	90.0469	8.11	NA	NA	NA	NA	NA	0	NA	NA	NA	other
8.111_104.0626	2.3019	0.2772	0.4254	DOR:NOR	C18:pos	Styrene	C8 H8	104.063	8.111	NA	S7220	HMDB0034240	1e-04	0.494	1	Benzenoids	Benzene and substituted derivatives	Styrenes	other
8.111_150.1409	19.1869	0.2461	0.4068	DOR:NOR	C18:pos	(3e)-4,8-dimethyl-1,3,7-nonatriene	C11 H18	150.141	8.111	NA	S4932528	HMDB0035792	0	-0.2145	3	Lipids and lipid-like molecules	Prenol lipids	Monoterpenoids	other
8.111_152.1202	13.5211	0.3095	0.4391	DOR:NOR	C18:pos	(-)-camphor	C10 H16 O	152.12	8.111	NA	M2759	NA	-1e-04	-0.4606	79	NA	NA	NA	other
8.111_166.1358	10.0287	0.3133	0.4406	DOR:NOR	C18:pos	Dihydrojasmone	C11 H18 O	166.136	8.111	NA	S56166	HMDB0031565	-1e-04	-0.471	9	Organooxygen compounds	Carbonyl compounds	Ketones	other
8.111_190.1723	35.3586	0.1941	0.396	DOR:NOR	C18:pos	1,4-di-tert-butylbenzene	C14 H22	190.172	8.111	NA	S13293	HMDB0094670	-2e-04	-0.9936	4	Benzenoids	Benzene and substituted derivatives	Phenylpropanes	other
8.111_208.1828	34.0204	0.1962	0.396	DOR:NOR	C18:pos	2-decylfuran	C14 H24 O	208.183	8.111	NA	S21105875	HMDB0032215	-1e-04	-0.4631	3	Organoheterocyclic compounds	Heteroaromatic compounds	null	other
8.111_240.2089	38.5314	0.1998	0.396	DOR:NOR	C18:pos	Cyclopentadecanolide	C15 H28 O2	240.209	8.111	NA	S205386	HMDB0034455	1e-04	0.3137	10	Phenylpropanoids and polyketides	Macrolides and analogues	null	other
8.111_243.2196	38.7732	0.1779	0.3915	DOR:NOR	C18:pos	NA	C14 H29 N O2	243.22	8.111	NA	NA	NA	NA	NA	0	NA	NA	NA	other
8.111_310.1449	54.2836	0.238	0.4048	DOR:NOR	C18:pos	NA	C13 H28 O4 P2	310.145	8.111	NA	NA	NA	NA	NA	0	NA	NA	NA	other
8.111_94.0783	5.8273	0.3214	0.4414	DOR:NOR	C18:pos	1,3,5-heptatriene	C7 H10	94.0783	8.111	NA	S4518902	HMDB0061889	0	-0.4255	3	Hydrocarbons	Unsaturated hydrocarbons	Olefins	other
8.112_108.0939	7.0785	0.3031	0.4377	DOR:NOR	C18:pos	(z)-1,3-octadiene	C8 H12	108.094	8.112	NA	S29321019	HMDB0061897	0	-0.0835	1	Hydrocarbons	Unsaturated hydrocarbons	Olefins	other
8.112_124.0888	5.346	0.2435	0.4068	DOR:NOR	C18:pos	3721	C8 H12 O	124.089	8.112	NA	S4446450	HMDB0031686	0	-0.2908	10	Organic oxygen compounds	Organooxygen compounds	Carbonyl compounds	other
8.112_138.1045	7.034	0.3189	0.4412	DOR:NOR	C18:pos	Isophorone	C9 H14 O	138.105	8.112	NA	S6296	HMDB0031195	0	0.0929	13	Organooxygen compounds	Carbonyl compounds	Ketones	other
8.112_248.1749	28.9827	0.1534	0.385	DOR:NOR	C18:pos	NA	NA	248.175	8.112	NA	NA	NA	NA	NA	0	NA	NA	NA	other
8.112_254.2242	8.9139	0.2082	0.4006	DOR:NOR	C18:pos	Palmitelaidic acid	C16 H30 O2	254.224	8.112	NA	S4445872	HMDB0012328	4e-04	1.5344	13	Lipids and lipid-like molecules	Fatty Acyls	Fatty acids and conjugates	other
8.112_264.1487	20.9054	0.0896	0.2996	DOR:NOR	C18:pos	Vorinostat	C14 H20 N2 O3	264.149	8.112	NA	S5120	HMDB0015568	-0.0013	-4.8011	5	Benzenoids	Benzene and substituted derivatives	null	other
8.112_270.202	0.0926	0.3393	0.4473	DOR:NOR	C18:pos	NA	C16 H30 O S	270.202	8.112	NA	NA	NA	NA	NA	0	NA	NA	NA	other
8.112_326.1172	63.5946	0.1428	0.3734	DOR:NOR	C18:pos	NA	C12 H28 N2 P2 S2	326.117	8.112	NA	NA	NA	NA	NA	0	NA	NA	NA	other
8.112_328.1175	55.2689	0.1954	0.396	DOR:NOR	C18:pos	NA	C17 H26 Cl P S	328.118	8.112	NA	NA	NA	NA	NA	0	NA	NA	NA	other
8.126_414.2037	12.3611	0.1382	0.3685	DOR:NOR	C18:pos	Inspra	C24 H30 O6	414.204	8.126	NA	S10203511	HMDB0014838	6e-04	1.3561	3	Lipids and lipid-like molecules	Steroids and steroid derivatives	Steroid lactones	other
8.134_308.198	2.6419	0.3481	0.4502	DOR:NOR	C18:pos	5-o-methyl embelin	C18 H28 O4	308.198	8.134	NA	S149914	HMDB0040867	7e-04	2.4201	8	Organooxygen compounds	Carbonyl compounds	Ketones	other
8.142_406.2328	0.0713	0.2452	0.4068	DOR:NOR	C18:pos	NA	C19 H30 N6 O4	406.233	8.142	NA	NA	NA	NA	NA	0	NA	NA	NA	other
8.144_301.2978	3.3354	0.3243	0.4414	DOR:NOR	C18:pos	Sphinganine	C18 H39 N O2	301.298	8.144	C00836	BGI520	NA	3e-04	1.0951	1	Organic nitrogen compounds	Organonitrogen compounds	Amines	other
8.145_345.3238	6.3303	0.5866	0.6494	DOR:NOR	C18:pos	NA	C20 H43 N O3	345.324	8.145	NA	NA	NA	NA	NA	0	NA	NA	NA	other
8.145_387.2615	0.3145	0.3788	0.4718	DOR:NOR	C18:pos	NA	C20 H37 N O6	387.262	8.145	NA	NA	NA	NA	NA	0	NA	NA	NA	other
8.147_389.3501	5.3379	0.5165	0.5881	DOR:NOR	C18:pos	NA	C23 H43 N5	389.35	8.147	NA	NA	NA	NA	NA	0	NA	NA	NA	other
8.151_392.2171	0.2355	0.3971	0.4825	DOR:NOR	C18:pos	NA	C18 H28 N6 O4	392.217	8.151	NA	NA	NA	NA	NA	0	NA	NA	NA	other
8.152_386.1852	22.8265	0.0343	0.1811	DOR:NOR	C18:pos	NA	C20 H27 N4 O2 P	386.185	8.152	NA	NA	NA	NA	NA	0	NA	NA	NA	up
8.156_315.3138	1.2577	0.7231	0.7681	DOR:NOR	C18:pos	NA	C19 H41 N O2	315.314	8.156	NA	NA	NA	NA	NA	0	NA	NA	NA	other
8.184_360.2753	1.2657	0.3637	0.4598	DOR:NOR	C18:pos	NA	C16 H37 N6 O P	360.275	8.184	NA	NA	NA	NA	NA	0	NA	NA	NA	other
8.184_449.1846	1.6214	0.0637	0.246	DOR:NOR	C18:pos	NA	C18 H33 N3 O6 P2	449.185	8.184	NA	NA	NA	NA	NA	0	NA	NA	NA	other
8.184_451.2235	1.3966	0.1415	0.3731	DOR:NOR	C18:pos	Valeryl-4-hydroxyvalsartan	C24 H29 N5 O4	451.224	8.184	NA	S8087298	HMDB0013848	-0.0015	-3.381	1	Organoheterocyclic compounds	Azoles	Tetrazoles	other
8.184_94.0783	8.2819	0.0083	0.0859	DOR:NOR	C18:pos	1,3,5-heptatriene	C7 H10	94.0783	8.184	NA	S4518902	HMDB0061889	0	-0.4255	3	Hydrocarbons	Unsaturated hydrocarbons	Olefins	up
8.185_451.185	1.146	0.4355	0.5142	DOR:NOR	C18:pos	Doxazosin	C23 H25 N5 O5	451.185	8.185	NA	S3045	HMDB0014728	6e-04	1.2464	1	Organoheterocyclic compounds	Diazinanes	Piperazines	other
8.186_108.0939	4.4307	0.455	0.5322	DOR:NOR	C18:pos	(z)-1,3-octadiene	C8 H12	108.094	8.186	NA	S29321019	HMDB0061897	0	-0.0835	1	Hydrocarbons	Unsaturated hydrocarbons	Olefins	other
8.186_208.1829	38.5402	0.1931	0.3954	DOR:NOR	C18:pos	2-decylfuran	C14 H24 O	208.183	8.186	NA	S21105875	HMDB0032215	-2e-04	-0.7626	3	Organoheterocyclic compounds	Heteroaromatic compounds	null	other
8.186_376.3077	1.2251	0.7039	0.7508	DOR:NOR	C18:pos	NA	C23 H40 N2 O2	376.308	8.186	NA	NA	NA	NA	NA	0	NA	NA	NA	other
8.186_380.2423	1.412	0.0975	0.3155	DOR:NOR	C18:pos	NA	C19 H32 N4 O4	380.242	8.186	NA	NA	NA	NA	NA	0	NA	NA	NA	other
8.186_413.23	1.2583	0.1605	0.3863	DOR:NOR	C18:pos	NA	C17 H36 Cl N3 O6	413.23	8.186	NA	NA	NA	NA	NA	0	NA	NA	NA	other
8.186_466.2238	1.3555	0.1589	0.3863	DOR:NOR	C18:pos	NA	NA	466.224	8.186	NA	NA	NA	NA	NA	0	NA	NA	NA	other
8.187_240.2089	17.464	0.2268	0.4007	DOR:NOR	C18:pos	Cyclopentadecanolide	C15 H28 O2	240.209	8.187	NA	S205386	HMDB0034455	1e-04	0.3115	10	Phenylpropanoids and polyketides	Macrolides and analogues	null	other
8.187_362.2919	1.2481	0.2036	0.3999	DOR:NOR	C18:pos	NA	C16 H39 N6 O P	362.292	8.187	NA	NA	NA	NA	NA	0	NA	NA	NA	other
8.187_419.1971	1.5756	0.0052	0.0719	DOR:NOR	C18:pos	NA	NA	419.197	8.187	NA	NA	NA	NA	NA	0	NA	NA	NA	up
8.188_138.1044	3.5955	0.2353	0.404	DOR:NOR	C18:pos	Isophorone	C9 H14 O	138.104	8.188	NA	S6296	HMDB0031195	0	0.2131	13	Organooxygen compounds	Carbonyl compounds	Ketones	other
8.188_317.2341	1.4315	0.0432	0.1998	DOR:NOR	C18:pos	NA	C20 H31 N O2	317.234	8.188	NA	NA	NA	NA	NA	0	NA	NA	NA	up
8.188_318.2372	1.4709	0.0259	0.1588	DOR:NOR	C18:pos	NA	C13 H30 N6 O3	318.237	8.188	NA	NA	NA	NA	NA	0	NA	NA	NA	up
8.188_357.2263	1.4668	0.0495	0.2178	DOR:NOR	C18:pos	NA	C19 H36 N O P S	357.226	8.188	NA	NA	NA	NA	NA	0	NA	NA	NA	up
8.188_371.2428	1.3543	0.1322	0.3602	DOR:NOR	C18:pos	NA	C20 H38 N O P S	371.243	8.188	NA	NA	NA	NA	NA	0	NA	NA	NA	other
8.188_458.1855	1.4427	0.1029	0.323	DOR:NOR	C18:pos	NA	NA	458.185	8.188	NA	NA	NA	NA	NA	0	NA	NA	NA	other
8.188_734.392	1.3574	0.1844	0.3915	DOR:NOR	C18:pos	NA	C54 H54 S	734.392	8.188	NA	NA	NA	NA	NA	0	NA	NA	NA	other
8.188_99.067	1.3677	0.0512	0.2188	DOR:NOR	C18:pos	NA	NA	99.067	8.188	NA	NA	NA	NA	NA	0	NA	NA	NA	other
8.189_111.067	1.4642	0.1096	0.3328	DOR:NOR	C18:pos	NA	NA	111.067	8.189	NA	NA	NA	NA	NA	0	NA	NA	NA	other
8.189_316.2313	1.4343	0.0387	0.1909	DOR:NOR	C18:pos	NA	NA	316.231	8.189	NA	NA	NA	NA	NA	0	NA	NA	NA	up
8.189_316.24	1.3793	0.091	0.3025	DOR:NOR	C18:pos	Pregnenolone	C21 H32 O2	316.24	8.189	C01953	S8611	HMDB0000253	2e-04	0.6203	12	Lipids and lipid-like molecules	Steroids and steroid derivatives	Pregnane steroids	other
8.189_433.213	1.4033	0.154	0.3851	DOR:NOR	C18:pos	NA	C20 H35 N O7 S	433.213	8.189	NA	NA	NA	NA	NA	0	NA	NA	NA	other
8.189_435.1692	1.446	0.1979	0.396	DOR:NOR	C18:pos	NA	NA	435.169	8.189	NA	NA	NA	NA	NA	0	NA	NA	NA	other
8.189_631.4582	0.7514	0.1958	0.396	DOR:NOR	C18:pos	NA	C35 H62 N5 O3 P	631.458	8.189	NA	NA	NA	NA	NA	0	NA	NA	NA	other
8.189_633.4644	2.3508	0.1493	0.3824	DOR:NOR	C18:pos	NA	NA	633.464	8.189	NA	NA	NA	NA	NA	0	NA	NA	NA	other
8.189_656.4497	1.3793	0.0475	0.2129	DOR:NOR	C18:pos	NA	C33 H71 O6 P3	656.45	8.189	NA	NA	NA	NA	NA	0	NA	NA	NA	up
8.19_314.2244	0.0785	0.0025	0.0472	DOR:NOR	C18:pos	Progesterone	C21 H30 O2	314.224	8.19	C00410	M553	NA	2e-04	0.4927	6	Lipids and lipid-like molecules	Steroids and steroid derivatives	Pregnane steroids	down
8.192_653.4401	0.7103	0.0643	0.2472	DOR:NOR	C18:pos	NA	C30 H65 N5 O6 P2	653.44	8.192	NA	NA	NA	NA	NA	0	NA	NA	NA	other
8.21_257.2716	2.8407	0.2545	0.4106	DOR:NOR	C18:pos	NA	C16 H35 N O	257.272	8.21	NA	NA	NA	NA	NA	0	NA	NA	NA	other
8.214_407.2033	1.7309	0.0689	0.2531	DOR:NOR	C18:pos	NA	C16 H35 N5 O P2 S	407.203	8.214	NA	NA	NA	NA	NA	0	NA	NA	NA	other
8.218_331.3234	21.8234	0.5347	0.6044	DOR:NOR	C18:pos	NA	C23 H41 N	331.323	8.218	NA	NA	NA	NA	NA	0	NA	NA	NA	other
8.219_349.2459	1.5625	0.0236	0.1512	DOR:NOR	C18:pos	NA	NA	349.246	8.219	NA	NA	NA	NA	NA	0	NA	NA	NA	up
8.229_166.1359	0.2284	0.4171	0.498	DOR:NOR	C18:pos	Dihydrojasmone	C11 H18 O	166.136	8.229	NA	S56166	HMDB0031565	-1e-04	-0.6808	9	Organooxygen compounds	Carbonyl compounds	Ketones	other
8.237_287.2457	2.9268	0.2835	0.4297	DOR:NOR	C18:pos	N,n-bis(2-hydroxyethyl)dodecanamide	C16 H33 N O3	287.246	8.237	NA	S8123	HMDB0032358	4e-04	1.3012	1	Lipids and lipid-like molecules	Fatty Acyls	Fatty amides	other
8.24_202.1568	6.7168	0.1963	0.396	DOR:NOR	C18:pos	1,3-nonanediol acetate	C11 H22 O3	202.157	8.24	NA	S204280	HMDB0032443	1e-04	0.4097	3	Lipids and lipid-like molecules	Fatty Acyls	Fatty alcohol esters	other
8.24_356.1939	1.2122	0.3023	0.4372	DOR:NOR	C18:pos	3-methylthiofentanyl	C21 H28 N2 O S	356.194	8.24	NA	S56092	HMDB0061718	-0.0016	-4.5895	1	Benzenoids	Benzene and substituted derivatives	Anilides	other
8.24_417.1596	1.2914	0.4958	0.5688	DOR:NOR	C18:pos	NA	C26 H19 N5 O	417.16	8.24	NA	NA	NA	NA	NA	0	NA	NA	NA	other
8.242_329.2562	0.1426	0.1836	0.3915	DOR:NOR	C18:pos	O-(4,8-dimethylnonanoyl)carnitine	C18 H35 N O4	329.256	8.242	NA	S27471335	HMDB0006202	4e-04	1.1521	2	Lipids and lipid-like molecules	Fatty Acyls	Fatty acid esters	other
8.242_401.1865	1.5176	0.0783	0.2734	DOR:NOR	C18:pos	NA	C14 H33 N3 O6 P2	401.187	8.242	NA	NA	NA	NA	NA	0	NA	NA	NA	other
8.243_399.2483	1.8019	0.0372	0.1878	DOR:NOR	C18:pos	NA	C18 H33 N5 O5	399.248	8.243	NA	NA	NA	NA	NA	0	NA	NA	NA	up
8.243_424.1935	1.3849	0.0389	0.1909	DOR:NOR	C18:pos	NA	C15 H34 N6 O2 P2 S	424.193	8.243	NA	NA	NA	NA	NA	0	NA	NA	NA	up
8.246_315.3136	1.617	0.6538	0.7067	DOR:NOR	C18:pos	NA	C19 H41 N O2	315.314	8.246	NA	NA	NA	NA	NA	0	NA	NA	NA	other
8.256_213.2457	2.1508	0.0059	0.076	DOR:NOR	C18:pos	NA	C14 H31 N	213.246	8.256	NA	NA	NA	NA	NA	0	NA	NA	NA	up
8.27_372.1899	0.0964	0.2273	0.4007	DOR:NOR	C18:pos	NA	C17 H28 N2 O7	372.19	8.27	NA	NA	NA	NA	NA	0	NA	NA	NA	other
8.281_184.1253	5.7775	0.3806	0.4723	DOR:NOR	C18:pos	Chamazulene	C14 H16	184.125	8.281	NA	S10268	HMDB0036470	-1e-04	-0.5091	1	Lipids and lipid-like molecules	Prenol lipids	Sesquiterpenoids	other
8.285_345.2511	0.0126	0.2137	0.4006	DOR:NOR	C18:pos	3-[(3-hydroxyundecanoyl)oxy]-4-(trimethylammonio)butanoate	C18 H35 N O5	345.251	8.285	NA	S59664326	HMDB0061637	4e-04	1.2341	1	Lipids and lipid-like molecules	Fatty Acyls	Fatty acid esters	other
8.288_368.1746	41.8145	0.2342	0.4037	DOR:NOR	C18:pos	NA	C19 H29 O5 P	368.175	8.288	NA	NA	NA	NA	NA	0	NA	NA	NA	other
8.29_141.1519	1.7095	0.0088	0.0884	DOR:NOR	C18:pos	Isometheptene	C9 H19 N	141.152	8.29	NA	S21106328	HMDB0015651	-2e-04	-1.3289	1	Organic nitrogen compounds	Organonitrogen compounds	Amines	up
8.292_336.2273	0.377	0.0363	0.1853	DOR:NOR	C18:pos	NA	C15 H32 N2 O6	336.227	8.292	NA	NA	NA	NA	NA	0	NA	NA	NA	down
8.292_350.2066	0.0134	0.2154	0.4006	DOR:NOR	C18:pos	NA	C16 H26 N6 O3	350.207	8.292	NA	NA	NA	NA	NA	0	NA	NA	NA	other
8.293_296.2348	0.3308	0.0679	0.2509	DOR:NOR	C18:pos	13s-hydroxyoctadecadienoic acid	C18 H32 O3	296.235	8.293	C14762	S4947055	HMDB0004667	3e-04	1.0462	10	Lipids and lipid-like molecules	Fatty Acyls	Lineolic acids and derivatives	other
8.299_164.0475	3.4867	0.1977	0.396	DOR:NOR	C18:pos	(e)-p-coumaric acid	C9 H8 O3	164.048	8.299	C00811	S553148	HMDB0002035	-1e-04	-0.8483	18	Phenylpropanoids and polyketides	Cinnamic acids and derivatives	Hydroxycinnamic acids and derivatives	other
8.299_196.0737	3.0938	0.2662	0.4175	DOR:NOR	C18:pos	Cu8460000	C10 H12 O4	196.074	8.299	NA	S19331	HMDB0029648	-2e-04	-0.9412	24	Benzenoids	Benzene and substituted derivatives	Benzoyl derivatives	other
8.299_220.11	2.8503	0.1845	0.3915	DOR:NOR	C18:pos	2416	C13 H16 O3	220.11	8.299	NA	S216124	HMDB0040424	0	-0.0756	11	Organic acids and derivatives	Keto acids and derivatives	Beta-keto acids and derivatives	other
8.299_252.136	2.3366	0.2442	0.4068	DOR:NOR	C18:pos	2,3-dimethoxy-5-methyl-6-(3-methyl-2-buten-1-yl)-1,4-benzenediol	C14 H20 O4	252.136	8.299	NA	S394877	HMDB0059661	2e-04	0.7183	3	Lipids and lipid-like molecules	Prenol lipids	Quinone and hydroquinone lipids	other
8.302_418.2326	0.0249	0.1209	0.3468	DOR:NOR	C18:pos	NA	C20 H30 N6 O4	418.233	8.302	NA	NA	NA	NA	NA	0	NA	NA	NA	other
8.31_414.2038	45.9179	0.2561	0.4122	DOR:NOR	C18:pos	Inspra	C24 H30 O6	414.204	8.31	NA	S10203511	HMDB0014838	5e-04	1.1179	3	Lipids and lipid-like molecules	Steroids and steroid derivatives	Steroid lactones	other
8.312_459.2615	21.9628	0.159	0.3863	DOR:NOR	C18:pos	NA	C26 H37 N O6	459.262	8.312	NA	NA	NA	NA	NA	0	NA	NA	NA	other
8.318_349.2602	2.0808	0.0113	0.1009	DOR:NOR	C18:pos	NA	C15 H36 N5 O2 P	349.26	8.318	NA	NA	NA	NA	NA	0	NA	NA	NA	up
8.32_202.0995	3.2133	0.0927	0.3054	DOR:NOR	C18:pos	1-(2,2-dimethylchromen-6-yl)ethan-1-one	C13 H14 O2	202.1	8.32	NA	S154177	HMDB0030816	-1e-04	-0.6154	3	Organoheterocyclic compounds	Benzopyrans	1-benzopyrans	other
8.325_239.2248	1.9975	0.1051	0.326	DOR:NOR	C18:pos	NA	C15 H29 N O	239.225	8.325	NA	NA	NA	NA	NA	0	NA	NA	NA	other
8.325_276.1721	3.1361	0.0416	0.195	DOR:NOR	C18:pos	Cyclandelate	C17 H24 O3	276.172	8.325	NA	S2790	HMDB0015586	4e-04	1.4493	7	Benzenoids	Benzene and substituted derivatives	null	up
8.325_366.2014	0.0286	0.2482	0.4068	DOR:NOR	C18:pos	NA	C17 H37 O2 P3	366.201	8.325	NA	NA	NA	NA	NA	0	NA	NA	NA	other
8.327_271.2874	2.1599	0.6434	0.6979	DOR:NOR	C18:pos	NA	C17 H37 N O	271.287	8.327	NA	NA	NA	NA	NA	0	NA	NA	NA	other
8.327_310.2142	0.0346	0.1798	0.3915	DOR:NOR	C18:pos	12(13)ep-9-kode	C18 H30 O4	310.214	8.327	NA	S4446134	HMDB0013623	3e-04	0.8109	4	Lipids and lipid-like molecules	Fatty Acyls	Fatty acids and conjugates	other
8.335_392.2171	0.0175	0.2477	0.4068	DOR:NOR	C18:pos	NA	C18 H28 N6 O4	392.217	8.335	NA	NA	NA	NA	NA	0	NA	NA	NA	other
8.336_332.1961	0.0722	0.1787	0.3915	DOR:NOR	C18:pos	NA	C17 H35 P3	332.196	8.336	NA	NA	NA	NA	NA	0	NA	NA	NA	other
8.339_292.2036	0.129	0.2404	0.4048	DOR:NOR	C18:pos	Colnelenic acid	C18 H28 O3	292.204	8.339	C16320	S4945818	HMDB0030996	3e-04	0.9845	3	Lipids and lipid-like molecules	Fatty Acyls	Fatty acids and conjugates	other
8.34_382.2326	0.0617	0.3023	0.4372	DOR:NOR	C18:pos	NA	C17 H40 N2 O P2 S	382.233	8.34	NA	NA	NA	NA	NA	0	NA	NA	NA	other
8.346_324.2297	0.1829	0.1375	0.3676	DOR:NOR	C18:pos	Unii:74d1ohc38h	C19 H32 O4	324.23	8.346	NA	S5142913	HMDB0031007	4e-04	1.265	1	Lipids and lipid-like molecules	Fatty Acyls	Fatty alcohols	other
8.348_229.2404	2.1353	0.124	0.3494	DOR:NOR	C18:pos	NA	C14 H31 N O	229.24	8.348	NA	NA	NA	NA	NA	0	NA	NA	NA	other
8.356_331.3235	14.1463	0.0083	0.086	DOR:NOR	C18:pos	NA	C23 H41 N	331.324	8.356	NA	NA	NA	NA	NA	0	NA	NA	NA	up
8.359_329.2562	0.0588	0.1127	0.3376	DOR:NOR	C18:pos	O-(4,8-dimethylnonanoyl)carnitine	C18 H35 N O4	329.256	8.359	NA	S27471335	HMDB0006202	4e-04	1.2553	2	Lipids and lipid-like molecules	Fatty Acyls	Fatty acid esters	other
8.36_551.3229	0.0361	0.2458	0.4068	DOR:NOR	C18:pos	NA	C26 H50 N O9 P	551.323	8.36	NA	NA	NA	NA	NA	0	NA	NA	NA	other
8.362_295.2141	2.1106	0.0206	0.1407	DOR:NOR	C18:pos	NA	C17 H29 N O3	295.214	8.362	NA	NA	NA	NA	NA	0	NA	NA	NA	up
8.365_178.0996	1.4304	0.1749	0.3915	DOR:NOR	C18:pos	2140	C11 H14 O2	178.1	8.365	NA	S7367	HMDB0033376	-2e-04	-1.0092	28	Benzenoids	Benzene and substituted derivatives	Benzyloxycarbonyls	other
8.365_308.2348	0.1405	0.2555	0.4116	DOR:NOR	C18:pos	9-(3-methyl-5-pentyl-2-furyl)nonanoic acid	C19 H32 O3	308.235	8.365	NA	S2342093	HMDB0031091	4e-04	1.2319	9	Lipids and lipid-like molecules	Fatty Acyls	Fatty acids and conjugates	other
8.369_334.2117	0.0665	0.1389	0.3689	DOR:NOR	C18:pos	NA	C16 H26 N6 O2	334.212	8.369	NA	NA	NA	NA	NA	0	NA	NA	NA	other
8.369_359.3391	2.4554	0.3136	0.4406	DOR:NOR	C18:pos	NA	C21 H45 N O3	359.339	8.369	NA	NA	NA	NA	NA	0	NA	NA	NA	other
8.37_315.3136	2.145	0.485	0.5592	DOR:NOR	C18:pos	NA	C19 H41 N O2	315.314	8.37	NA	NA	NA	NA	NA	0	NA	NA	NA	other
8.373_210.1257	0.0471	0.1448	0.3756	DOR:NOR	C18:pos	3796	C12 H18 O3	210.126	8.373	NA	S4260417	HMDB0037642	-1e-04	-0.4607	9	Benzenoids	Phenols	Methoxyphenols	other
8.374_226.1569	0.0551	0.1143	0.3399	DOR:NOR	C18:pos	(−)-trans-methyl dihydrojasmonate	C13 H22 O3	226.157	8.374	NA	S1376701	HMDB0031740	0	-0.0486	2	Lipids and lipid-like molecules	Fatty Acyls	Lineolic acids and derivatives	other
8.386_192.1515	2.5057	0.4332	0.512	DOR:NOR	C18:pos	2595	C13 H20 O	192.151	8.386	NA	S553581	HMDB0036565	-1e-04	-0.6445	24	Lipids and lipid-like molecules	Prenol lipids	Sesquiterpenoids	other
8.392_415.2255	56.7259	0.3647	0.4602	DOR:NOR	C18:pos	NA	C26 H29 N3 O2	415.226	8.392	NA	NA	NA	NA	NA	0	NA	NA	NA	other
8.395_414.2038	83.8105	0.2933	0.4325	DOR:NOR	C18:pos	Inspra	C24 H30 O6	414.204	8.395	NA	S10203511	HMDB0014838	5e-04	1.1208	3	Lipids and lipid-like molecules	Steroids and steroid derivatives	Steroid lactones	other
8.404_118.0782	3.987	0.2582	0.4133	DOR:NOR	C18:pos	Indane	C9 H10	118.078	8.404	NA	S9903	HMDB0059837	0	0.3717	2	Benzenoids	Indanes	null	other
8.406_260.1174	3.3735	0.3052	0.4385	DOR:NOR	C18:pos	NA	C14 H16 N2 O3	260.117	8.406	NA	NA	NA	NA	NA	0	NA	NA	NA	other
8.429_331.3082	4.5863	0.184	0.3915	DOR:NOR	C18:pos	NA	C19 H41 N O3	331.308	8.429	NA	NA	NA	NA	NA	0	NA	NA	NA	other
8.43_271.2874	2.5739	0.5238	0.595	DOR:NOR	C18:pos	NA	C17 H37 N O	271.287	8.43	NA	NA	NA	NA	NA	0	NA	NA	NA	other
8.434_406.2328	0.0238	0.128	0.3563	DOR:NOR	C18:pos	NA	C18 H34 N2 O8	406.233	8.434	NA	NA	NA	NA	NA	0	NA	NA	NA	other
8.461_298.2292	0.0317	0.0071	0.0827	DOR:NOR	C18:pos	3-[(8e,11e)-8,11,14-pentadecatrien-1-yl]phenol	C21 H30 O	298.229	8.461	NA	S4511905	HMDB0033862	4e-04	1.4767	1	Benzenoids	Benzene and substituted derivatives	Phenols and derivatives	down
8.462_262.1544	0.1316	0.0424	0.1972	DOR:NOR	C18:pos	NA	C12 H18 N6 O	262.154	8.462	NA	NA	NA	NA	NA	0	NA	NA	NA	down
8.478_280.2874	1.8232	0.0614	0.2415	DOR:NOR	C18:pos	NA	C18 H36 N2	280.287	8.478	NA	NA	NA	NA	NA	0	NA	NA	NA	other
8.489_266.149	4.3621	0.1649	0.3874	DOR:NOR	C18:pos	NA	C10 H22 N2 O6	266.149	8.489	NA	NA	NA	NA	NA	0	NA	NA	NA	other
8.496_299.2822	0.1616	0.0048	0.0702	DOR:NOR	C18:pos	D-sphingosine	C18 H37 N O2	299.282	8.496	C00319	M418	NA	3e-04	0.8654	3	null	null	null	down
8.497_325.3704	33.0802	0.2305	0.4014	DOR:NOR	C18:pos	NA	C22 H47 N	325.37	8.497	NA	NA	NA	NA	NA	0	NA	NA	NA	other
8.504_333.2277	0.0638	0.1213	0.3468	DOR:NOR	C18:pos	NA	C15 H31 N3 O5	333.228	8.504	NA	NA	NA	NA	NA	0	NA	NA	NA	other
8.507_360.2295	0.0218	0.2102	0.4006	DOR:NOR	C18:pos	Cannabigerolic acid	C22 H32 O4	360.229	8.507	C20406	M6510	NA	6e-04	1.6748	4	null	null	null	other
8.515_220.1464	1.3505	0.0473	0.2124	DOR:NOR	C18:pos	Dk3970000	C14 H20 O2	220.146	8.515	NA	S12336	HMDB0013817	-1e-04	-0.5454	22	Lipids and lipid-like molecules	Prenol lipids	Monoterpenoids	up
8.527_332.1961	0.0756	0.0116	0.1013	DOR:NOR	C18:pos	NA	C17 H35 P3	332.196	8.527	NA	NA	NA	NA	NA	0	NA	NA	NA	down
8.529_318.2167	0.157	0.0227	0.1465	DOR:NOR	C18:pos	NA	C16 H26 N6 O	318.217	8.529	NA	NA	NA	NA	NA	0	NA	NA	NA	down
8.53_310.2141	0.0686	0.1527	0.385	DOR:NOR	C18:pos	12(13)ep-9-kode	C18 H30 O4	310.214	8.53	NA	S4446134	HMDB0013623	3e-04	0.9545	4	Lipids and lipid-like molecules	Fatty Acyls	Fatty acids and conjugates	other
8.533_268.2037	0.3121	0.2628	0.4156	DOR:NOR	C18:pos	NA	C16 H28 O3	268.204	8.533	NA	NA	NA	NA	NA	0	NA	NA	NA	other
8.545_250.1931	0.3126	0.3505	0.4514	DOR:NOR	C18:pos	3a,6,6,9a-tetramethyldecahydronaphtho[2,1-b]furan-2(1h)-one	C16 H26 O2	250.193	8.545	NA	S55077	HMDB0035293	2e-04	0.8431	3	Organoheterocyclic compounds	Naphthofurans	null	other
8.555_283.3235	2.6299	0.1406	0.3713	DOR:NOR	C18:pos	NA	C19 H41 N	283.324	8.555	NA	NA	NA	NA	NA	0	NA	NA	NA	other
8.556_461.4078	10.2232	0.4053	0.4898	DOR:NOR	C18:pos	NA	C27 H51 N5 O	461.408	8.556	NA	NA	NA	NA	NA	0	NA	NA	NA	other
8.558_417.3814	7.3158	0.5764	0.6411	DOR:NOR	C18:pos	NA	C25 H47 N5	417.381	8.558	NA	NA	NA	NA	NA	0	NA	NA	NA	other
8.56_282.2192	0.0726	0.1691	0.389	DOR:NOR	C18:pos	NA	C17 H30 O3	282.219	8.56	NA	NA	NA	NA	NA	0	NA	NA	NA	other
8.56_337.2245	3.1927	0.3004	0.4372	DOR:NOR	C18:pos	NA	C19 H31 N O4	337.224	8.56	NA	NA	NA	NA	NA	0	NA	NA	NA	other
8.561_373.3552	5.2927	0.6336	0.6903	DOR:NOR	C18:pos	NA	C22 H47 N O3	373.355	8.561	NA	NA	NA	NA	NA	0	NA	NA	NA	other
8.562_278.1497	1659.11	0.3841	0.4739	DOR:NOR	C18:pos	NA	NA	278.15	8.562	NA	NA	NA	NA	NA	0	NA	NA	NA	other
8.563_180.0423	1.6068	0.0589	0.2367	DOR:NOR	C18:pos	Aspirin	C9 H8 O4	180.042	8.563	C01405	S2157	HMDB0001879	0	-0.2202	19	Benzenoids	Benzene and substituted derivatives	Benzoic acids and derivatives	other
8.563_279.1548	1.5023	0.2992	0.4372	DOR:NOR	C18:pos	NA	C9 H21 N5 O5	279.155	8.563	NA	NA	NA	NA	NA	0	NA	NA	NA	other
8.563_329.3289	2.0342	0.3794	0.4718	DOR:NOR	C18:pos	NA	C20 H43 N O2	329.329	8.563	NA	NA	NA	NA	NA	0	NA	NA	NA	other
8.563_578.285	1.8187	0.588	0.6499	DOR:NOR	C18:pos	NA	C29 H42 N2 O10	578.285	8.563	NA	NA	NA	NA	NA	0	NA	NA	NA	other
8.564_148.0162	1.6284	0.1329	0.3602	DOR:NOR	C18:pos	NA	C8 H4 O3	148.016	8.564	NA	NA	NA	NA	NA	0	NA	NA	NA	other
8.564_222.0893	1.5888	0.0935	0.3069	DOR:NOR	C18:pos	Monobutyl phthalate	C12 H14 O4	222.089	8.564	NA	M2821	NA	-1e-04	-0.4671	20	NA	NA	NA	other
8.564_278.1515	1.7749	0.1982	0.396	DOR:NOR	C18:pos	Mono(2-ethylhexyl) phthalate (mehp)	C16 H22 O4	278.151	8.564	C03343	M2914	NA	3e-04	1.0785	15	Benzenoids	Benzene and substituted derivatives	Benzoic acids and derivatives	other
8.564_323.2091	1.0678	0.8742	0.8948	DOR:NOR	C18:pos	N-({3-oxo-2-[(2e)-2-penten-1-yl]cyclopentyl}acetyl)isoleucine	C18 H29 N O4	323.209	8.564	NA	S24785127	HMDB0029391	5e-04	1.697	1	Organic acids and derivatives	Carboxylic acids and derivatives	Amino acids, peptides, and analogues	other
8.575_268.1673	0.0085	0.2256	0.4006	DOR:NOR	C18:pos	(3ar,4r,5r,6as)-5-hydroxy-4-[(1e,3s)-3-hydroxy-1-octen-1-yl]hexahydro-2h-cyclopenta[b]furan-2-one	C15 H24 O4	268.167	8.575	NA	S24534114	HMDB0240213	1e-04	0.3917	7	Lipids and lipid-like molecules	Fatty Acyls	Fatty alcohols	other
8.575_408.2485	0.0062	0.2598	0.4138	DOR:NOR	C18:pos	NA	C19 H32 N6 O4	408.248	8.575	NA	NA	NA	NA	NA	0	NA	NA	NA	other
8.578_178.1359	0.1646	0.1639	0.3874	DOR:NOR	C18:pos	Propofol	C12 H18 O	178.136	8.578	NA	S4774	HMDB0014956	-1e-04	-0.7661	10	Benzenoids	Benzene and substituted derivatives	Cumenes	other
8.578_303.2921	2.2093	0.7873	0.8203	DOR:NOR	C18:pos	NA	C21 H37 N	303.292	8.578	NA	NA	NA	NA	NA	0	NA	NA	NA	other
8.579_560.3814	0.0375	0.2254	0.4006	DOR:NOR	C18:pos	NA	C26 H53 N6 O5 P	560.381	8.579	NA	NA	NA	NA	NA	0	NA	NA	NA	other
8.583_308.1961	0.0747	0.2608	0.4145	DOR:NOR	C18:pos	NA	C14 H24 N6 O2	308.196	8.583	NA	NA	NA	NA	NA	0	NA	NA	NA	other
8.587_359.3548	10.6093	0.2678	0.4189	DOR:NOR	C18:pos	NA	C25 H45 N	359.355	8.587	NA	NA	NA	NA	NA	0	NA	NA	NA	other
8.588_368.256	0.0559	0.3528	0.4527	DOR:NOR	C18:pos	?-cortol	C21 H36 O5	368.256	8.588	C05482	S216069	HMDB0003180	3e-04	0.8981	3	Lipids and lipid-like molecules	Steroids and steroid derivatives	Hydroxysteroids	other
8.593_338.2427	2.7604	0.3144	0.4406	DOR:NOR	C18:pos	NA	C16 H30 N6 O2	338.243	8.593	NA	NA	NA	NA	NA	0	NA	NA	NA	other
8.6_287.2456	3.4245	0.1227	0.3482	DOR:NOR	C18:pos	N,n-bis(2-hydroxyethyl)dodecanamide	C16 H33 N O3	287.246	8.6	NA	S8123	HMDB0032358	4e-04	1.5133	1	Lipids and lipid-like molecules	Fatty Acyls	Fatty amides	other
8.614_345.3236	2.6792	0.0549	0.2277	DOR:NOR	C18:pos	NA	C20 H43 N O3	345.324	8.614	NA	NA	NA	NA	NA	0	NA	NA	NA	other
8.616_285.3029	1.264	0.5722	0.6382	DOR:NOR	C18:pos	NA	C18 H39 N O	285.303	8.616	NA	NA	NA	NA	NA	0	NA	NA	NA	other
8.627_171.1625	2.8039	0.2281	0.4009	DOR:NOR	C18:pos	Mfcd00130070	C10 H21 N O	171.162	8.627	NA	S58789	HMDB0036195	-2e-04	-0.9005	1	Lipids and lipid-like molecules	Fatty Acyls	Fatty amides	other
8.628_148.0162	1.83	0.0342	0.1811	DOR:NOR	C18:pos	NA	C8 H4 O3	148.016	8.628	NA	NA	NA	NA	NA	0	NA	NA	NA	up
8.628_337.2246	2.0147	0.0261	0.1595	DOR:NOR	C18:pos	NA	C19 H31 N O4	337.225	8.628	NA	NA	NA	NA	NA	0	NA	NA	NA	up
8.629_120.0212	1.5535	0.1335	0.3607	DOR:NOR	C18:pos	NA	C7 H4 O2	120.021	8.629	NA	NA	NA	NA	NA	0	NA	NA	NA	other
8.629_178.1359	0.1897	0.1358	0.3648	DOR:NOR	C18:pos	Propofol	C12 H18 O	178.136	8.629	NA	S4774	HMDB0014956	-2e-04	-0.8693	10	Benzenoids	Benzene and substituted derivatives	Cumenes	other
8.629_180.0423	1.5264	0.0286	0.1666	DOR:NOR	C18:pos	Aspirin	C9 H8 O4	180.042	8.629	C01405	S2157	HMDB0001879	-1e-04	-0.4039	19	Benzenoids	Benzene and substituted derivatives	Benzoic acids and derivatives	up
8.629_323.2091	1.0994	0.5527	0.62	DOR:NOR	C18:pos	N-({3-oxo-2-[(2e)-2-penten-1-yl]cyclopentyl}acetyl)isoleucine	C18 H29 N O4	323.209	8.629	NA	S24785127	HMDB0029391	6e-04	1.7568	1	Organic acids and derivatives	Carboxylic acids and derivatives	Amino acids, peptides, and analogues	other
8.63_149.0195	1.9239	0.0291	0.1675	DOR:NOR	C18:pos	NA	NA	149.019	8.63	NA	NA	NA	NA	NA	0	NA	NA	NA	up
8.635_331.2716	14.3677	0.4936	0.5665	DOR:NOR	C18:pos	NA	C18 H37 N O4	331.272	8.635	NA	NA	NA	NA	NA	0	NA	NA	NA	other
8.638_257.1989	1.7576	0.1186	0.3437	DOR:NOR	C18:pos	N-lauroylglycine	C14 H27 N O3	257.199	8.638	NA	S307040	HMDB0013272	2e-04	0.774	1	Organic acids and derivatives	Carboxylic acids and derivatives	Amino acids, peptides, and analogues	other
8.642_320.1596	0.03	0.2909	0.4319	DOR:NOR	C18:pos	NA	C14 H20 N6 O3	320.16	8.642	NA	NA	NA	NA	NA	0	NA	NA	NA	other
8.643_278.1497	2.5172	0.1325	0.3602	DOR:NOR	C18:pos	NA	C12 H18 N6 O2	278.15	8.643	NA	NA	NA	NA	NA	0	NA	NA	NA	other
8.644_268.1674	0.01	0.2718	0.4213	DOR:NOR	C18:pos	(3ar,4r,5r,6as)-5-hydroxy-4-[(1e,3s)-3-hydroxy-1-octen-1-yl]hexahydro-2h-cyclopenta[b]furan-2-one	C15 H24 O4	268.167	8.644	NA	S24534114	HMDB0240213	1e-04	0.2945	7	Lipids and lipid-like molecules	Fatty Acyls	Fatty alcohols	other
8.644_408.2485	0.0068	0.2916	0.4319	DOR:NOR	C18:pos	NA	C19 H32 N6 O4	408.248	8.644	NA	NA	NA	NA	NA	0	NA	NA	NA	other
8.644_424.2224	0.0319	0.248	0.4068	DOR:NOR	C18:pos	1,2-dioctanoyl-sn-glycero-3-phosphate	C19 H37 O8 P	424.222	8.644	NA	S113635	HMDB0114771	2e-04	0.5348	1	Lipids and lipid-like molecules	Glycerophospholipids	Glycerophosphates	other
8.644_431.3242	0.0587	0.306	0.4385	DOR:NOR	C18:pos	NA	C23 H45 N O6	431.324	8.644	NA	NA	NA	NA	NA	0	NA	NA	NA	other
8.646_276.2088	0.3428	0.084	0.2855	DOR:NOR	C18:pos	Stearidonic acid	C18 H28 O2	276.209	8.646	C16300	S4471933	HMDB0006547	1e-04	0.4894	8	Lipids and lipid-like molecules	Fatty Acyls	Lineolic acids and derivatives	other
8.647_352.2611	0.056	0.1441	0.3749	DOR:NOR	C18:pos	Glyceryl 2-linolenate	C21 H36 O4	352.261	8.647	NA	S9849475	HMDB0011540	3e-04	0.8192	4	Lipids and lipid-like molecules	Fatty Acyls	Lineolic acids and derivatives	other
8.647_399.3707	2.9586	0.5831	0.6464	DOR:NOR	C18:pos	NA	C24 H49 N O3	399.371	8.647	NA	NA	NA	NA	NA	0	NA	NA	NA	other
8.648_279.256	0.6269	0.5755	0.6408	DOR:NOR	C18:pos	Linoleamide	C18 H33 N O	279.256	8.648	NA	S4940587	HMDB0062656	3e-04	0.9239	1	Lipids and lipid-like molecules	Fatty Acyls	Fatty amides	other
8.648_403.2931	0.0104	0.2297	0.4014	DOR:NOR	C18:pos	NA	C21 H41 N O6	403.293	8.648	NA	NA	NA	NA	NA	0	NA	NA	NA	other
8.649_392.2536	0.1774	0.21	0.4006	DOR:NOR	C18:pos	NA	C19 H32 N6 O3	392.254	8.649	NA	NA	NA	NA	NA	0	NA	NA	NA	other
8.65_295.2508	0.729	0.9737	0.9758	DOR:NOR	C18:pos	NA	C18 H33 N O2	295.251	8.65	NA	NA	NA	NA	NA	0	NA	NA	NA	other
8.651_241.2769	1.2794	0.6008	0.6608	DOR:NOR	C18:pos	NA	C16 H35 N	241.277	8.651	NA	NA	NA	NA	NA	0	NA	NA	NA	other
8.652_228.1363	0.0174	0.2689	0.4199	DOR:NOR	C18:pos	Traumatic acid	C12 H20 O4	228.136	8.652	C16308	S4446155	HMDB0000933	-1e-04	-0.5328	2	Lipids and lipid-like molecules	Fatty Acyls	Fatty acids and conjugates	other
8.656_368.2559	0.0301	0.2244	0.4006	DOR:NOR	C18:pos	?-cortol	C21 H36 O5	368.256	8.656	C05482	S216069	HMDB0003180	4e-04	1.0335	3	Lipids and lipid-like molecules	Steroids and steroid derivatives	Hydroxysteroids	other
8.661_126.0318	8.4972	0.264	0.4166	DOR:NOR	C18:pos	Phloroglucinol	C6 H6 O3	126.032	8.661	C02183	M2546	NA	-1e-04	-1.0917	9	Benzenoids	Benzene and substituted derivatives	Phenols and derivatives	other
8.661_140.0475	8.078	0.2826	0.429	DOR:NOR	C18:pos	Lv1850000	C7 H8 O3	140.048	8.661	NA	S11485	HMDB0059862	-2e-04	-1.1026	10	Organoheterocyclic compounds	Furans	Furoic acid and derivatives	other
8.661_182.0945	8.9827	0.2722	0.4217	DOR:NOR	C18:pos	3815	C10 H14 O3	182.095	8.661	NA	S55496	HMDB0037641	-2e-04	-1.2948	10	Benzenoids	Phenols	Methoxyphenols	other
8.661_256.1674	9.4552	0.2749	0.4236	DOR:NOR	C18:pos	4-[(2-isopropyl-5-methylcyclohexyl)oxy]-4-oxobutanoic acid	C14 H24 O4	256.167	8.661	NA	S8374504	HMDB0036143	0	0.0709	4	Lipids and lipid-like molecules	Prenol lipids	Monoterpenoids	other
8.661_534.3173	44.832	0.4152	0.4973	DOR:NOR	C18:pos	NA	C33 H47 N2 P S	534.317	8.661	NA	NA	NA	NA	NA	0	NA	NA	NA	other
8.661_98.0369	7.6449	0.2584	0.4133	DOR:NOR	C18:pos	2491	C5 H6 O2	98.0369	8.661	C20441	S7083	HMDB0013742	-1e-04	-1.3446	3	Organoheterocyclic compounds	Heteroaromatic compounds	null	other
8.662_301.2249	5.5042	0.3854	0.4739	DOR:NOR	C18:pos	3-[(2,6-dimethylheptanoyl)oxy]-4-(trimethylammonio)butanoate	C16 H31 N O4	301.225	8.662	NA	S34448950	HMDB0006320	4e-04	1.4621	2	Lipids and lipid-like molecules	Fatty Acyls	Fatty acid esters	other
8.663_397.2798	16.6779	0.4841	0.5589	DOR:NOR	C18:pos	NA	C17 H39 N3 O7	397.28	8.663	NA	NA	NA	NA	NA	0	NA	NA	NA	other
8.664_310.2141	0.0225	0.161	0.3863	DOR:NOR	C18:pos	12(13)ep-9-kode	C18 H30 O4	310.214	8.664	NA	S4446134	HMDB0013623	3e-04	0.9417	4	Lipids and lipid-like molecules	Fatty Acyls	Fatty acids and conjugates	other
8.678_318.2167	0.2279	0.0385	0.1909	DOR:NOR	C18:pos	NA	C16 H26 N6 O	318.217	8.678	NA	NA	NA	NA	NA	0	NA	NA	NA	down
8.682_292.201	1.4491	0.1723	0.3915	DOR:NOR	C18:pos	NA	C14 H24 N6 O	292.201	8.682	NA	NA	NA	NA	NA	0	NA	NA	NA	other
8.684_284.2348	1.6928	0.0277	0.1644	DOR:NOR	C18:pos	16-heptadecyne-1,2,4-triol	C17 H32 O3	284.235	8.684	NA	S2283375	HMDB0035473	4e-04	1.3359	2	Lipids and lipid-like molecules	Fatty Acyls	Fatty alcohols	up
8.685_401.3499	1.7262	0.9299	0.9399	DOR:NOR	C18:pos	NA	C23 H47 N O4	401.35	8.685	NA	NA	NA	NA	NA	0	NA	NA	NA	other
8.695_199.1939	1.1391	0.7996	0.8305	DOR:NOR	C18:pos	NA	C12 H25 N O	199.194	8.695	NA	NA	NA	NA	NA	0	NA	NA	NA	other
8.695_232.1826	2.044	0.0164	0.1236	DOR:NOR	C18:pos	Mi5550000	C16 H24 O	232.183	8.695	NA	S4517909	HMDB0029704	1e-04	0.2409	1	Lipids and lipid-like molecules	Prenol lipids	Sesquiterpenoids	up
8.696_371.2667	1.8165	0.8745	0.8948	DOR:NOR	C18:pos	NA	C20 H37 N O5	371.267	8.696	NA	NA	NA	NA	NA	0	NA	NA	NA	other
8.696_376.222	2.921	0.815	0.8432	DOR:NOR	C18:pos	NA	C17 H32 N2 O7	376.222	8.696	NA	NA	NA	NA	NA	0	NA	NA	NA	other
8.698_371.3395	15.9818	0.3004	0.4372	DOR:NOR	C18:pos	NA	C22 H45 N O3	371.339	8.698	NA	NA	NA	NA	NA	0	NA	NA	NA	other
8.709_359.3548	15.4108	0.3841	0.4739	DOR:NOR	C18:pos	NA	C25 H45 N	359.355	8.709	NA	NA	NA	NA	NA	0	NA	NA	NA	other
8.715_338.2451	0.1052	0.2007	0.3965	DOR:NOR	C18:pos	8,9-dihetre	C20 H34 O4	338.245	8.715	C14773	S4446268	HMDB0002311	6e-04	1.8442	9	Lipids and lipid-like molecules	Fatty Acyls	Eicosanoids	other
8.718_257.2714	1.9932	0.409	0.4934	DOR:NOR	C18:pos	NA	C16 H35 N O	257.271	8.718	NA	NA	NA	NA	NA	0	NA	NA	NA	other
8.718_425.3346	6.9849	0.4996	0.572	DOR:NOR	C18:pos	NA	C22 H43 N5 O3	425.335	8.718	NA	NA	NA	NA	NA	0	NA	NA	NA	other
8.728_378.2379	0.0251	0.1525	0.385	DOR:NOR	C18:pos	NA	C18 H30 N6 O3	378.238	8.728	NA	NA	NA	NA	NA	0	NA	NA	NA	other
8.73_373.2824	0.0156	0.2114	0.4006	DOR:NOR	C18:pos	3-[(3-hydroxytridecanoyl)oxy]-4-(trimethylammonio)butanoate	C20 H39 N O5	373.282	8.73	NA	S59664327	HMDB0061639	4e-04	1.1808	1	Lipids and lipid-like molecules	Fatty Acyls	Fatty acid esters	other
8.73_469.3614	8.2614	0.4482	0.5258	DOR:NOR	C18:pos	NA	C24 H47 N5 O4	469.361	8.73	NA	NA	NA	NA	NA	0	NA	NA	NA	other
8.732_171.1625	3.0338	0.3054	0.4385	DOR:NOR	C18:pos	Mfcd00130070	C10 H21 N O	171.162	8.732	NA	S58789	HMDB0036195	-2e-04	-0.9005	1	Lipids and lipid-like molecules	Fatty Acyls	Fatty amides	other
8.74_513.3878	8.5116	0.4718	0.5469	DOR:NOR	C18:pos	NA	C26 H51 N5 O5	513.388	8.74	NA	NA	NA	NA	NA	0	NA	NA	NA	other
8.741_295.2507	0.9197	0.8765	0.896	DOR:NOR	C18:pos	NA	C18 H33 N O2	295.251	8.741	NA	NA	NA	NA	NA	0	NA	NA	NA	other
8.745_338.2427	1.4502	0.8192	0.8462	DOR:NOR	C18:pos	NA	C16 H30 N6 O2	338.243	8.745	NA	NA	NA	NA	NA	0	NA	NA	NA	other
8.748_557.4134	9.1987	0.5202	0.5912	DOR:NOR	C18:pos	NA	C30 H62 N3 P3	557.413	8.748	NA	NA	NA	NA	NA	0	NA	NA	NA	other
8.772_279.256	1.0291	0.6511	0.7044	DOR:NOR	C18:pos	Linoleamide	C18 H33 N O	279.256	8.772	NA	S4940587	HMDB0062656	3e-04	0.8957	1	Lipids and lipid-like molecules	Fatty Acyls	Fatty amides	other
8.774_319.2482	1.1542	0.4969	0.5694	DOR:NOR	C18:pos	NA	C15 H33 N3 O4	319.248	8.774	NA	NA	NA	NA	NA	0	NA	NA	NA	other
8.776_395.3028	5.1427	0.9435	0.9508	DOR:NOR	C18:pos	9,12-hexadecadienoylcarnitine	C23 H41 N O4	395.303	8.776	NA	S30776714	HMDB0013334	7e-04	1.8713	1	null	null	null	other
8.781_251.1518	3.5544	0.1929	0.3954	DOR:NOR	C18:pos	NA	C14 H21 N O3	251.152	8.781	NA	NA	NA	NA	NA	0	NA	NA	NA	other
8.783_410.0858	1.8929	0.1637	0.3874	DOR:NOR	C18:pos	NA	NA	410.086	8.783	NA	NA	NA	NA	NA	0	NA	NA	NA	other
8.791_347.2445	1.469	0.1006	0.3197	DOR:NOR	C18:pos	NA	C15 H34 N5 O2 P	347.245	8.791	NA	NA	NA	NA	NA	0	NA	NA	NA	other
8.795_338.2451	0.0345	0.1225	0.3482	DOR:NOR	C18:pos	8,9-dihetre	C20 H34 O4	338.245	8.795	C14773	S4446268	HMDB0002311	6e-04	1.6602	9	Lipids and lipid-like molecules	Fatty Acyls	Eicosanoids	other
8.808_329.256	0.0339	0.2404	0.4048	DOR:NOR	C18:pos	O-(4,8-dimethylnonanoyl)carnitine	C18 H35 N O4	329.256	8.808	NA	S27471335	HMDB0006202	7e-04	1.9863	2	Lipids and lipid-like molecules	Fatty Acyls	Fatty acid esters	other
8.808_357.2873	0.0238	0.1763	0.3915	DOR:NOR	C18:pos	NA	C20 H39 N O4	357.287	8.808	NA	NA	NA	NA	NA	0	NA	NA	NA	other
8.81_362.2429	0.016	0.0739	0.2642	DOR:NOR	C18:pos	NA	C18 H30 N6 O2	362.243	8.81	NA	NA	NA	NA	NA	0	NA	NA	NA	other
8.812_254.1881	0.0716	0.1818	0.3915	DOR:NOR	C18:pos	2,6,10,10-tetramethyl-1-oxaspiro[4.5]dec-6-yl acetate	C15 H26 O3	254.188	8.812	NA	S84699	HMDB0040276	1e-04	0.438	5	Organoheterocyclic compounds	Tetrahydrofurans	null	other
8.815_178.1359	0.0366	0.1782	0.3915	DOR:NOR	C18:pos	Propofol	C12 H18 O	178.136	8.815	NA	S4774	HMDB0014956	-1e-04	-0.755	10	Benzenoids	Benzene and substituted derivatives	Cumenes	other
8.816_339.2769	0.0343	0.2756	0.4241	DOR:NOR	C18:pos	Mfcd01320532	C20 H37 N O3	339.277	8.816	NA	S4941514	HMDB0013631	5e-04	1.3896	1	Organic acids and derivatives	Carboxylic acids and derivatives	Amino acids, peptides, and analogues	other
8.817_268.2036	2.0723	0.4792	0.5542	DOR:NOR	C18:pos	NA	C16 H28 O3	268.204	8.817	NA	NA	NA	NA	NA	0	NA	NA	NA	other
8.824_294.1443	0.0303	0.226	0.4006	DOR:NOR	C18:pos	NA	C13 H29 O P3	294.144	8.824	NA	NA	NA	NA	NA	0	NA	NA	NA	other
8.826_242.1517	0.0218	0.2477	0.4068	DOR:NOR	C18:pos	5-octyl-2-oxotetrahydro-3-furancarboxylic acid	C13 H22 O4	242.152	8.826	NA	S35013298	HMDB0030987	1e-04	0.4979	2	Organoheterocyclic compounds	Lactones	Gamma butyrolactones	other
8.827_192.1516	0.0524	0.1187	0.3437	DOR:NOR	C18:pos	2595	C13 H20 O	192.152	8.827	NA	S553581	HMDB0036565	-2e-04	-1.2503	24	Lipids and lipid-like molecules	Prenol lipids	Sesquiterpenoids	other
8.831_348.2272	0.1341	0.2284	0.401	DOR:NOR	C18:pos	NA	C18 H39 P3	348.227	8.831	NA	NA	NA	NA	NA	0	NA	NA	NA	other
8.835_316.2011	0.0502	0.1614	0.3863	DOR:NOR	C18:pos	NA	C16 H24 N6 O	316.201	8.835	NA	NA	NA	NA	NA	0	NA	NA	NA	other
8.84_436.366	1.0015	0.8908	0.909	DOR:NOR	C18:pos	NA	C26 H48 N2 O3	436.366	8.84	NA	NA	NA	NA	NA	0	NA	NA	NA	other
8.843_180.0788	2.6253	0.0966	0.3147	DOR:NOR	C18:pos	Propylparaben	C10 H12 O3	180.079	8.843	NA	S6907	HMDB0032574	-2e-04	-0.8563	34	Benzenoids	Benzene and substituted derivatives	Benzoic acids and derivatives	other
8.85_370.2323	3.0023	0.0979	0.3155	DOR:NOR	C18:pos	NA	C18 H35 N4 P S	370.232	8.85	NA	NA	NA	NA	NA	0	NA	NA	NA	other
8.851_246.123	0.0047	0.2195	0.4006	DOR:NOR	C18:pos	NA	C11 H14 N6 O	246.123	8.851	NA	NA	NA	NA	NA	0	NA	NA	NA	other
8.851_292.201	3.9995	0.2841	0.4299	DOR:NOR	C18:pos	NA	C14 H24 N6 O	292.201	8.851	NA	NA	NA	NA	NA	0	NA	NA	NA	other
8.852_114.1045	0.2357	0.3772	0.4705	DOR:NOR	C18:pos	Heptanal	C7 H14 O	114.105	8.852	NA	S7838	HMDB0031475	0	-0.3473	15	Organic oxygen compounds	Organooxygen compounds	Carbonyl compounds	other
8.852_226.1569	0.0138	0.2141	0.4006	DOR:NOR	C18:pos	(−)-trans-methyl dihydrojasmonate	C13 H22 O3	226.157	8.852	NA	S1376701	HMDB0031740	0	0.0334	2	Lipids and lipid-like molecules	Fatty Acyls	Lineolic acids and derivatives	other
8.852_263.1258	0.0429	0.2431	0.4066	DOR:NOR	C18:pos	NA	C13 H17 N3 O3	263.126	8.852	NA	NA	NA	NA	NA	0	NA	NA	NA	other
8.853_148.1253	0.0725	0.2327	0.4035	DOR:NOR	C18:pos	N-amylbenzene	C11 H16	148.125	8.853	NA	S10404	HMDB0059834	-1e-04	-0.4267	3	Benzenoids	Benzene and substituted derivatives	null	other
8.853_158.1096	0.0412	0.2347	0.4037	DOR:NOR	C18:pos	NA	C12 H14	158.11	8.853	NA	NA	NA	NA	NA	0	NA	NA	NA	other
8.853_194.1308	0.0196	0.2005	0.3965	DOR:NOR	C18:pos	Sedanolide	C12 H18 O2	194.131	8.853	NA	M6215	NA	-1e-04	-0.6369	18	NA	NA	NA	other
8.853_326.2453	0.0099	0.3371	0.4471	DOR:NOR	C18:pos	2,4-dihydroxyheptadec-16-ynyl acetate	C19 H34 O4	326.245	8.853	NA	S3173029	HMDB0031048	4e-04	1.1269	4	Lipids and lipid-like molecules	Fatty Acyls	Fatty alcohols	other
8.853_350.1854	0.0103	0.2251	0.4006	DOR:NOR	C18:pos	NA	C19 H30 N2 S2	350.185	8.853	NA	NA	NA	NA	NA	0	NA	NA	NA	other
8.853_392.2533	0.1936	0.3398	0.4478	DOR:NOR	C18:pos	NA	C20 H41 O3 P S	392.253	8.853	NA	NA	NA	NA	NA	0	NA	NA	NA	other
8.853_82.0782	0.2819	0.3563	0.4556	DOR:NOR	C18:pos	3-methylcyclopentene	C6 H10	82.0782	8.853	NA	S13625	HMDB0031544	0	-0.0619	1	Hydrocarbons	Unsaturated hydrocarbons	Olefins	other
8.854_308.2347	0.0064	0.3683	0.4624	DOR:NOR	C18:pos	9-(3-methyl-5-pentyl-2-furyl)nonanoic acid	C19 H32 O3	308.235	8.854	NA	S2342093	HMDB0031091	4e-04	1.3309	9	Lipids and lipid-like molecules	Fatty Acyls	Fatty acids and conjugates	other
8.854_334.2115	0.0071	0.2877	0.431	DOR:NOR	C18:pos	NA	C16 H26 N6 O2	334.212	8.854	NA	NA	NA	NA	NA	0	NA	NA	NA	other
8.855_134.1096	0.3289	0.4863	0.5595	DOR:NOR	C18:pos	P-cymene	C10 H14	134.11	8.855	C06575	S7183	HMDB0005805	-1e-04	-0.4675	11	Lipids and lipid-like molecules	Prenol lipids	Monoterpenoids	other
8.855_138.1046	0.164	0.2863	0.431	DOR:NOR	C18:pos	Isophorone	C9 H14 O	138.105	8.855	NA	S6296	HMDB0031195	-2e-04	-1.2261	13	Organooxygen compounds	Carbonyl compounds	Ketones	other
8.855_370.2715	0.1982	0.3495	0.4511	DOR:NOR	C18:pos	NA	C21 H38 O5	370.272	8.855	NA	NA	NA	NA	NA	0	NA	NA	NA	other
8.855_410.2638	0.005	0.2509	0.4075	DOR:NOR	C18:pos	NA	C21 H39 N4 P S	410.264	8.855	NA	NA	NA	NA	NA	0	NA	NA	NA	other
8.856_160.1253	0.1704	0.3092	0.4388	DOR:NOR	C18:pos	2-(p-isopropylphenyl)propene	C12 H16	160.125	8.856	NA	S16061	HMDB0061813	-1e-04	-0.6806	2	Lipids and lipid-like molecules	Prenol lipids	Monoterpenoids	other
8.856_646.4404	0.0267	0.3298	0.4431	DOR:NOR	C18:pos	NA	C36 H65 N4 P3	646.44	8.856	NA	NA	NA	NA	NA	0	NA	NA	NA	other
8.857_258.1982	0.0182	0.2345	0.4037	DOR:NOR	C18:pos	Acetyl hexamethyl tetralin	C18 H26 O	258.198	8.857	NA	S80719	HMDB0061860	2e-04	0.6421	1	Benzenoids	Tetralins	null	other
8.857_366.1484	0.0348	0.2223	0.4006	DOR:NOR	C18:pos	(2e,7z)-1-(4-hydroxy-3-methoxyphenyl)-9-(4-hydroxyphenyl)-2,7-nonadiene-4,6-dione	C22 H22 O5	366.148	8.857	NA	S30777357	HMDB0039610	-0.0017	-4.5106	2	Benzenoids	Phenols	Methoxyphenols	other
8.858_210.1258	0.0139	0.2058	0.4002	DOR:NOR	C18:pos	3796	C12 H18 O3	210.126	8.858	NA	S4260417	HMDB0037642	-2e-04	-0.8805	9	Benzenoids	Phenols	Methoxyphenols	other
8.858_405.3085	0.0072	0.212	0.4006	DOR:NOR	C18:pos	NA	C21 H43 N O6	405.308	8.858	NA	NA	NA	NA	NA	0	NA	NA	NA	other
8.859_434.2638	0.0502	0.3444	0.4501	DOR:NOR	C18:pos	NA	C21 H44 N2 O P2 S	434.264	8.859	NA	NA	NA	NA	NA	0	NA	NA	NA	other
8.859_92.0627	0.3351	0.3082	0.4385	DOR:NOR	C18:pos	Toluene	C7 H8	92.0627	8.859	C01455	S1108	HMDB0034168	-1e-04	-0.6018	1	Benzenoids	Benzene and substituted derivatives	Toluenes	other
8.86_122.1095	0.3125	0.3867	0.4746	DOR:NOR	C18:pos	3-allylcyclohexene	C9 H14	122.109	8.86	NA	S123394	HMDB0061784	0	0.0437	2	Hydrocarbons	Unsaturated hydrocarbons	Olefins	other
8.86_90.047	0.2623	0.3201	0.4412	DOR:NOR	C18:pos	NA	C7 H6	90.047	8.86	NA	NA	NA	NA	NA	0	NA	NA	NA	other
8.86_94.0784	0.3359	0.3414	0.4487	DOR:NOR	C18:pos	1,3,5-heptatriene	C7 H10	94.0784	8.86	NA	S4518902	HMDB0061889	-1e-04	-1.2365	3	Hydrocarbons	Unsaturated hydrocarbons	Olefins	other
8.861_294.2192	0.0187	0.1842	0.3915	DOR:NOR	C18:pos	9-oxo-10(e),12(e)-octadecadienoic acid	C18 H30 O3	294.219	8.861	C14766	M5838	NA	3e-04	1.1497	24	Lipids and lipid-like molecules	Fatty Acyls	Lineolic acids and derivatives	other
8.861_380.164	0.0439	0.2162	0.4006	DOR:NOR	C18:pos	Ecabet	C20 H28 O5 S	380.164	8.861	NA	S59201	HMDB0015613	0.0018	4.6914	1	Lipids and lipid-like molecules	Prenol lipids	Diterpenoids	other
8.862_108.094	0.0549	0.25	0.4074	DOR:NOR	C18:pos	(z)-1,3-octadiene	C8 H12	108.094	8.862	NA	S29321019	HMDB0061897	-1e-04	-0.5942	1	Hydrocarbons	Unsaturated hydrocarbons	Olefins	other
8.862_118.0783	0.1962	0.2998	0.4372	DOR:NOR	C18:pos	Indane	C9 H10	118.078	8.862	NA	S9903	HMDB0059837	-1e-04	-0.4682	2	Benzenoids	Indanes	null	other
8.862_154.0994	0.0649	0.2622	0.4155	DOR:NOR	C18:pos	Ri2735000	C9 H14 O2	154.099	8.862	NA	S7801	HMDB0031302	-1e-04	-0.3597	10	Lipids and lipid-like molecules	Fatty Acyls	Fatty acid esters	other
8.862_154.1358	0.0718	0.2762	0.4242	DOR:NOR	C18:pos	(+/-)-eucalyptol	C10 H18 O	154.136	8.862	C09844	S2656	HMDB0004472	0	-0.0147	68	Organoheterocyclic compounds	Oxanes	null	other
8.862_168.1152	0.2998	0.3036	0.4379	DOR:NOR	C18:pos	Trans-geranic acid	C10 H16 O2	168.115	8.862	NA	S4439624	NA	-2e-04	-1.0789	21	NA	NA	NA	other
8.862_172.11	0.0544	0.3082	0.4385	DOR:NOR	C18:pos	Oi1695000	C9 H16 O3	172.11	8.862	NA	S15496	HMDB0040165	0	-0.2766	10	Organic acids and derivatives	Keto acids and derivatives	Gamma-keto acids and derivatives	other
8.862_186.1257	0.0122	0.1929	0.3954	DOR:NOR	C18:pos	1,3,3-trimethyl-2-oxabicyclo[2.2.2]octane-6,7-diol	C10 H18 O3	186.126	8.862	NA	S102967	HMDB0041376	-1e-04	-0.5058	13	Organoheterocyclic compounds	Oxanes	null	other
8.862_228.1362	0.0182	0.2146	0.4006	DOR:NOR	C18:pos	Traumatic acid	C12 H20 O4	228.136	8.862	C16308	S4446155	HMDB0000933	-1e-04	-0.334	2	Lipids and lipid-like molecules	Fatty Acyls	Fatty acids and conjugates	other
8.863_248.2138	0.0708	0.3087	0.4385	DOR:NOR	C18:pos	2-(12-tridecen-1-yl)furan	C17 H28 O	248.214	8.863	NA	S5257116	HMDB0030932	2e-04	0.7928	2	Organoheterocyclic compounds	Heteroaromatic compounds	null	other
8.866_252.2088	1.3486	0.9514	0.9572	DOR:NOR	C18:pos	(8z)-oxacycloheptadec-8-en-2-one	C16 H28 O2	252.209	8.866	NA	S4517661	HMDB0031086	1e-04	0.4871	8	Phenylpropanoids and polyketides	Macrolides and analogues	null	other
8.866_338.1823	0.0379	0.2208	0.4006	DOR:NOR	C18:pos	NA	C19 H31 O P S	338.182	8.866	NA	NA	NA	NA	NA	0	NA	NA	NA	other
8.866_339.2769	0.0224	0.2155	0.4006	DOR:NOR	C18:pos	Mfcd01320532	C20 H37 N O3	339.277	8.866	NA	S4941514	HMDB0013631	5e-04	1.3896	1	Organic acids and derivatives	Carboxylic acids and derivatives	Amino acids, peptides, and analogues	other
8.867_318.2167	0.1562	0.0768	0.2701	DOR:NOR	C18:pos	NA	C16 H26 N6 O	318.217	8.867	NA	NA	NA	NA	NA	0	NA	NA	NA	other
8.873_135.0686	4.277	0.1752	0.3915	DOR:NOR	C18:pos	Acetanilide	C8 H9 N O	135.069	8.873	NA	S880	HMDB0001250	-2e-04	-1.4851	11	Benzenoids	Benzene and substituted derivatives	null	other
8.874_265.2039	19.1515	0.2386	0.4048	DOR:NOR	C18:pos	NA	C16 H27 N O2	265.204	8.874	NA	NA	NA	NA	NA	0	NA	NA	NA	other
8.874_401.3863	0.6513	0.596	0.6566	DOR:NOR	C18:pos	NA	C24 H51 N O3	401.386	8.874	NA	NA	NA	NA	NA	0	NA	NA	NA	other
8.875_311.3548	1.971	0.5383	0.6071	DOR:NOR	C18:pos	NA	C21 H45 N	311.355	8.875	NA	NA	NA	NA	NA	0	NA	NA	NA	other
8.876_357.3601	0.6206	0.6186	0.6764	DOR:NOR	C18:pos	NA	C22 H47 N O2	357.36	8.876	NA	NA	NA	NA	NA	0	NA	NA	NA	other
8.878_354.2765	0.52	0.493	0.566	DOR:NOR	C18:pos	1715064	C21 H38 O4	354.276	8.878	NA	S4517636	HMDB0011538	5e-04	1.4969	2	Lipids and lipid-like molecules	Fatty Acyls	Lineolic acids and derivatives	other
8.88_287.1916	0.0427	0.1003	0.3197	DOR:NOR	C18:pos	NA	C15 H29 N O2 S	287.192	8.88	NA	NA	NA	NA	NA	0	NA	NA	NA	other
8.88_331.2717	2.4138	0.3819	0.4728	DOR:NOR	C18:pos	NA	C18 H37 N O4	331.272	8.88	NA	NA	NA	NA	NA	0	NA	NA	NA	other
8.889_394.269	0.9234	0.5831	0.6464	DOR:NOR	C18:pos	NA	C17 H39 N4 O4 P	394.269	8.889	NA	NA	NA	NA	NA	0	NA	NA	NA	other
8.903_349.2602	1.3822	0.2146	0.4006	DOR:NOR	C18:pos	NA	C15 H36 N5 O2 P	349.26	8.903	NA	NA	NA	NA	NA	0	NA	NA	NA	other
8.907_110.1097	1.6781	0.0772	0.2706	DOR:NOR	C18:pos	1733342	C8 H14	110.11	8.907	NA	S12451	HMDB0061902	-1e-04	-0.9788	5	Hydrocarbons	Unsaturated hydrocarbons	Branched unsaturated hydrocarbons	other
8.907_286.214	1.6414	0.029	0.1675	DOR:NOR	C18:pos	1792831	C16 H30 O4	286.214	8.907	C19615	S10027	HMDB0000672	4e-04	1.462	3	Lipids and lipid-like molecules	Fatty Acyls	Fatty acids and conjugates	up
8.909_280.1283	0.0308	0.2226	0.4006	DOR:NOR	C18:pos	NA	C12 H27 O P3	280.128	8.909	NA	NA	NA	NA	NA	0	NA	NA	NA	other
8.911_358.2115	0.0152	0.2121	0.4006	DOR:NOR	C18:pos	NA	C18 H34 N2 O S2	358.212	8.911	NA	NA	NA	NA	NA	0	NA	NA	NA	other
8.914_296.1959	0.9469	0.7606	0.7977	DOR:NOR	C18:pos	NA	C12 H28 N2 O6	296.196	8.914	NA	NA	NA	NA	NA	0	NA	NA	NA	other
8.917_313.3339	0.5856	0.4851	0.5592	DOR:NOR	C18:pos	NA	C20 H43 N O	313.334	8.917	NA	NA	NA	NA	NA	0	NA	NA	NA	other
8.925_266.1855	2.1158	0.4587	0.5359	DOR:NOR	C18:pos	NA	C12 H22 N6 O	266.185	8.925	NA	NA	NA	NA	NA	0	NA	NA	NA	other
8.927_287.2457	2.7121	0.5985	0.659	DOR:NOR	C18:pos	N,n-bis(2-hydroxyethyl)dodecanamide	C16 H33 N O3	287.246	8.927	NA	S8123	HMDB0032358	4e-04	1.3227	1	Lipids and lipid-like molecules	Fatty Acyls	Fatty amides	other
8.931_302.2243	0.0501	0.0025	0.0466	DOR:NOR	C18:pos	Eicosapentanoic acid	C20 H30 O2	302.224	8.931	C06428	S393682	HMDB0001999	3e-04	0.9387	13	Lipids and lipid-like molecules	Fatty Acyls	Fatty acids and conjugates	down
8.935_206.1672	0.0673	0.2062	0.4002	DOR:NOR	C18:pos	513992	C14 H22 O	206.167	8.935	NA	S8483	HMDB0013825	-2e-04	-0.8623	11	Benzenoids	Benzene and substituted derivatives	Phenylpropanes	other
8.944_269.3081	0.5167	0.0164	0.1236	DOR:NOR	C18:pos	Oda	C18 H39 N	269.308	8.944	NA	S15016	HMDB0029586	2e-04	0.6997	1	Organonitrogen compounds	Amines	Primary amines	down
8.944_270.1828	10.1106	0.2956	0.4346	DOR:NOR	C18:pos	3543	C15 H26 O4	270.183	8.944	NA	S54974	HMDB0040459	3e-04	1.0693	1	Phenylpropanoids and polyketides	Macrolides and analogues	null	other
8.945_154.0994	0.2483	0.2827	0.429	DOR:NOR	C18:pos	Ri2735000	C9 H14 O2	154.099	8.945	NA	S7801	HMDB0031302	0	-0.2535	10	Lipids and lipid-like molecules	Fatty Acyls	Fatty acid esters	other
8.947_108.0939	0.2715	0.2876	0.431	DOR:NOR	C18:pos	(z)-1,3-octadiene	C8 H12	108.094	8.947	NA	S29321019	HMDB0061897	0	-0.3659	1	Hydrocarbons	Unsaturated hydrocarbons	Olefins	other
8.948_470.3025	0.0322	0.2116	0.4006	DOR:NOR	C18:pos	(2r,4ar,6bs,12as)-1-hydroxy-1,2,6b,9,9,12a-hexamethyl-10,13-dioxo-1,3,4,5,6,6a,6b,7,8,8a,9,10,11,12,12a,12b,13,14b-octadecahydro-4a(2h)-picenecarboxylic acid	C29 H42 O5	470.303	8.948	NA	S35014633	HMDB0038683	7e-04	1.4569	1	Organic oxygen compounds	Organooxygen compounds	Carbonyl compounds	other
8.958_312.2271	8.1518	0.1546	0.3851	DOR:NOR	C18:pos	NA	C14 H28 N6 O2	312.227	8.958	NA	NA	NA	NA	NA	0	NA	NA	NA	other
8.97_429.3813	0.6731	0.4391	0.5167	DOR:NOR	C18:pos	NA	C25 H51 N O4	429.381	8.97	NA	NA	NA	NA	NA	0	NA	NA	NA	other
8.979_399.3707	6.69	0.9373	0.9458	DOR:NOR	C18:pos	NA	C24 H49 N O3	399.371	8.979	NA	NA	NA	NA	NA	0	NA	NA	NA	other
8.99_395.3239	6.7609	0.4795	0.5542	DOR:NOR	C18:pos	NA	C24 H45 N O S	395.324	8.99	NA	NA	NA	NA	NA	0	NA	NA	NA	other
8.991_400.2794	8.0976	0.3849	0.4739	DOR:NOR	C18:pos	NA	C20 H41 N4 P S	400.279	8.991	NA	NA	NA	NA	NA	0	NA	NA	NA	other
8.999_439.3504	7.4341	0.5042	0.5758	DOR:NOR	C18:pos	NA	C23 H45 N5 O3	439.35	8.999	NA	NA	NA	NA	NA	0	NA	NA	NA	other
8.999_444.3058	8.574	0.38	0.4718	DOR:NOR	C18:pos	NA	C20 H40 N6 O5	444.306	8.999	NA	NA	NA	NA	NA	0	NA	NA	NA	other
9_361.2603	1.4361	0.0749	0.2659	DOR:NOR	C18:pos	N-arachidonoylglycine	C22 H35 N O3	361.26	9	NA	S4446510	HMDB0005096	0.0014	3.7789	2	Organic acids and derivatives	Carboxylic acids and derivatives	Amino acids, peptides, and analogues	other
9.003_216.1515	2.0891	0.1258	0.3524	DOR:NOR	C18:pos	Hexyl cinnamaldehyde	C15 H20 O	216.151	9.003	NA	S1267362	HMDB0031736	0	-0.1494	8	Phenylpropanoids and polyketides	Cinnamaldehydes	null	other
9.003_285.3028	1.9969	0.2969	0.4356	DOR:NOR	C18:pos	NA	C18 H39 N O	285.303	9.003	NA	NA	NA	NA	NA	0	NA	NA	NA	other
9.004_483.377	7.3358	0.5271	0.5982	DOR:NOR	C18:pos	NA	C25 H49 N5 O4	483.377	9.004	NA	NA	NA	NA	NA	0	NA	NA	NA	other
9.004_488.3324	10.217	0.4357	0.5142	DOR:NOR	C18:pos	NA	C30 H50 O P2	488.332	9.004	NA	NA	NA	NA	NA	0	NA	NA	NA	other
9.005_254.2244	0.4441	0.0612	0.2415	DOR:NOR	C18:pos	Palmitelaidic acid	C16 H30 O2	254.224	9.005	NA	S4445872	HMDB0012328	1e-04	0.5431	13	Lipids and lipid-like molecules	Fatty Acyls	Fatty acids and conjugates	other
9.006_294.217	0.4298	0.0592	0.2367	DOR:NOR	C18:pos	NA	C14 H26 N6 O	294.217	9.006	NA	NA	NA	NA	NA	0	NA	NA	NA	other
9.006_380.2923	0.0512	0.0945	0.3092	DOR:NOR	C18:pos	Persin	C23 H40 O4	380.292	9.006	NA	S4446387	HMDB0041103	3e-04	0.9192	9	Lipids and lipid-like molecules	Fatty Acyls	Fatty alcohols	other
9.007_280.2399	0.3926	0.0188	0.1343	DOR:NOR	C18:pos	2210856	C18 H32 O2	280.24	9.007	NA	S4445609	HMDB0006270	3e-04	1.1746	12	Lipids and lipid-like molecules	Fatty Acyls	Lineolic acids and derivatives	down
9.007_436.2797	0.044	0.0668	0.2509	DOR:NOR	C18:pos	6-o-[bis(diisopropylamino)acetyl]hexonic acid	C20 H40 N2 O8	436.28	9.007	NA	S379963	HMDB0029949	-0.0013	-2.9167	1	Organic acids and derivatives	Carboxylic acids and derivatives	Amino acids, peptides, and analogues	other
9.008_319.2482	1.0597	0.6604	0.7124	DOR:NOR	C18:pos	NA	C15 H33 N3 O4	319.248	9.008	NA	NA	NA	NA	NA	0	NA	NA	NA	other
9.008_320.2329	0.2343	0.0507	0.2188	DOR:NOR	C18:pos	NA	C16 H28 N6 O	320.233	9.008	NA	NA	NA	NA	NA	0	NA	NA	NA	other
9.009_527.4035	8.2096	0.501	0.5728	DOR:NOR	C18:pos	NA	C27 H53 N5 O5	527.404	9.009	NA	NA	NA	NA	NA	0	NA	NA	NA	other
9.01_420.285	0.0316	0.2029	0.3996	DOR:NOR	C18:pos	NA	C20 H40 N2 O7	420.285	9.01	NA	NA	NA	NA	NA	0	NA	NA	NA	other
9.01_532.3593	9.8112	0.4777	0.5529	DOR:NOR	C18:pos	NA	C24 H48 N6 O7	532.359	9.01	NA	NA	NA	NA	NA	0	NA	NA	NA	other
9.012_257.2353	1.8411	0.2148	0.4006	DOR:NOR	C18:pos	NA	C15 H31 N O2	257.235	9.012	NA	NA	NA	NA	NA	0	NA	NA	NA	other
9.012_571.4291	8.4461	0.5196	0.5909	DOR:NOR	C18:pos	NA	C29 H57 N5 O6	571.429	9.012	NA	NA	NA	NA	NA	0	NA	NA	NA	other
9.015_615.4546	9.0629	0.4988	0.5713	DOR:NOR	C18:pos	NA	C31 H61 N5 O7	615.455	9.015	NA	NA	NA	NA	NA	0	NA	NA	NA	other
9.017_659.4811	11.957	0.3897	0.4768	DOR:NOR	C18:pos	NA	C35 H72 N3 O2 P3	659.481	9.017	NA	NA	NA	NA	NA	0	NA	NA	NA	other
9.021_668.4103	0.3458	0.2624	0.4155	DOR:NOR	C18:pos	NA	C32 H56 N6 O9	668.41	9.021	NA	NA	NA	NA	NA	0	NA	NA	NA	other
9.023_168.1152	0.0698	0.2467	0.4068	DOR:NOR	C18:pos	Trans-geranic acid	C10 H16 O2	168.115	9.023	NA	S4439624	NA	-2e-04	-1.2363	21	NA	NA	NA	other
9.023_200.1415	0.0353	0.2212	0.4006	DOR:NOR	C18:pos	9-hydroxy-10-undecenoic acid	C11 H20 O3	200.142	9.023	NA	S8640809	HMDB0032662	-2e-04	-1.0745	3	Organic acids and derivatives	Hydroxy acids and derivatives	Medium-chain hydroxy acids and derivatives	other
9.023_712.4355	0.2993	0.2122	0.4006	DOR:NOR	C18:pos	NA	C31 H67 N6 O6 P3	712.436	9.023	NA	NA	NA	NA	NA	0	NA	NA	NA	other
9.023_751.5055	0.2518	0.1534	0.385	DOR:NOR	C18:pos	NA	C41 H74 N3 O5 P S	751.505	9.023	NA	NA	NA	NA	NA	0	NA	NA	NA	other
9.026_122.1095	0.3471	0.2497	0.4074	DOR:NOR	C18:pos	3-allylcyclohexene	C9 H14	122.109	9.026	NA	S123394	HMDB0061784	0	0.0437	2	Hydrocarbons	Unsaturated hydrocarbons	Olefins	other
9.027_150.1045	0.227	0.2947	0.4337	DOR:NOR	C18:pos	Thymol	C10 H14 O	150.105	9.027	NA	S21105998	HMDB0001878	0	0.0054	27	Lipids and lipid-like molecules	Prenol lipids	Monoterpenoids	other
9.027_331.2718	0.0303	0.0865	0.2915	DOR:NOR	C18:pos	NA	C18 H37 N O4	331.272	9.027	NA	NA	NA	NA	NA	0	NA	NA	NA	other
9.028_310.2505	0.0496	0.2685	0.4198	DOR:NOR	C18:pos	2-hydroxy-8-(2-octyl-1-cyclopropen-1-yl)octanoic acid	C19 H34 O3	310.25	9.028	NA	S35013309	HMDB0031060	3e-04	0.9737	1	Lipids and lipid-like molecules	Fatty Acyls	Fatty alcohols	other
9.031_301.2611	16.4577	0.2713	0.421	DOR:NOR	C18:pos	NA	C17 H35 N O3	301.261	9.031	NA	NA	NA	NA	NA	0	NA	NA	NA	other
9.034_319.1994	1.8791	0.6113	0.6697	DOR:NOR	C18:pos	NA	C16 H33 N O S2	319.199	9.034	NA	NA	NA	NA	NA	0	NA	NA	NA	other
9.035_302.1729	2.0252	0.4873	0.5598	DOR:NOR	C18:pos	Butyrin	C15 H26 O6	302.173	9.035	NA	S13849665	HMDB0031094	1e-04	0.2823	1	Lipids and lipid-like molecules	Glycerolipids	Triradylcglycerols	other
9.035_316.1886	2.0562	0.5354	0.6044	DOR:NOR	C18:pos	(6s)-2,6-anhydro-6-[(1s)-2-isopropyl-5-methylcyclohexyl]-l-gulonic acid	C16 H28 O6	316.189	9.035	NA	S35031680	HMDB0060004	0	0.032	1	Lipids and lipid-like molecules	Prenol lipids	Terpene glycosides	other
9.035_324.1548	2.0719	0.4544	0.532	DOR:NOR	C18:pos	Valaciclovir	C13 H20 N6 O4	324.155	9.035	NA	S54770	HMDB0014716	-2e-04	-0.7445	2	Organic acids and derivatives	Carboxylic acids and derivatives	Amino acids, peptides, and analogues	other
9.035_330.2041	1.9846	0.5287	0.5994	DOR:NOR	C18:pos	NA	C18 H34 O S2	330.204	9.035	NA	NA	NA	NA	NA	0	NA	NA	NA	other
9.036_279.256	0.771	0.8461	0.8703	DOR:NOR	C18:pos	Linoleamide	C18 H33 N O	279.256	9.036	NA	S4940587	HMDB0062656	3e-04	0.9239	1	Lipids and lipid-like molecules	Fatty Acyls	Fatty amides	other
9.039_182.1309	0.5279	0.5512	0.6187	DOR:NOR	C18:pos	Ethyl 2-nonynoate	C11 H18 O2	182.131	9.039	NA	S55374	HMDB0036215	-2e-04	-0.9808	18	Lipids and lipid-like molecules	Fatty Acyls	Fatty acid esters	other
9.04_342.2165	0.0714	0.0013	0.0356	DOR:NOR	C18:pos	NA	C18 H26 N6 O	342.216	9.04	NA	NA	NA	NA	NA	0	NA	NA	NA	down
9.045_391.3057	1.8178	0.1727	0.3915	DOR:NOR	C18:pos	NA	C19 H41 N3 O5	391.306	9.045	NA	NA	NA	NA	NA	0	NA	NA	NA	other
9.047_326.2241	0.0657	0.0027	0.0495	DOR:NOR	C18:pos	3?-hydroxydesogestrel	C22 H30 O2	326.224	9.047	NA	S8034247	HMDB0060755	5e-04	1.5384	1	Lipids and lipid-like molecules	Steroids and steroid derivatives	Estrane steroids	down
9.049_250.2295	0.6205	0.5931	0.6544	DOR:NOR	C18:pos	Civetone	C17 H30 O	250.23	9.049	NA	S9509154	HMDB0031336	1e-04	0.5866	2	Organic oxygen compounds	Organooxygen compounds	Carbonyl compounds	other
9.049_333.1827	1.148	0.5821	0.6461	DOR:NOR	C18:pos	NA	NA	333.183	9.049	NA	NA	NA	NA	NA	0	NA	NA	NA	other
9.052_336.2273	0.0118	0.2288	0.401	DOR:NOR	C18:pos	NA	C16 H28 N6 O2	336.227	9.052	NA	NA	NA	NA	NA	0	NA	NA	NA	other
9.057_140.0839	0.0866	0.2361	0.404	DOR:NOR	C18:pos	2459	C8 H12 O2	140.084	9.057	NA	S1267058	HMDB0040463	-1e-04	-1.0456	13	Lipids and lipid-like molecules	Fatty Acyls	Fatty acid esters	other
9.057_296.2348	0.3952	0.4271	0.5064	DOR:NOR	C18:pos	13s-hydroxyoctadecadienoic acid	C18 H32 O3	296.235	9.057	C14762	S4947055	HMDB0004667	4e-04	1.2364	10	Lipids and lipid-like molecules	Fatty Acyls	Lineolic acids and derivatives	other
9.058_344.2323	0.0395	0.0008	0.0285	DOR:NOR	C18:pos	NA	C18 H28 N6 O	344.232	9.058	NA	NA	NA	NA	NA	0	NA	NA	NA	down
9.059_328.2397	0.4103	0.0088	0.0884	DOR:NOR	C18:pos	Docosahexaenoic acid	C22 H32 O2	328.24	9.059	C06429	S393183	HMDB0002183	6e-04	1.7349	6	Lipids and lipid-like molecules	Fatty Acyls	Fatty acids and conjugates	down
9.06_94.0784	0.178	0.2878	0.431	DOR:NOR	C18:pos	1,3,5-heptatriene	C7 H10	94.0784	9.06	NA	S4518902	HMDB0061889	-1e-04	-1.1353	3	Hydrocarbons	Unsaturated hydrocarbons	Olefins	other
9.061_172.11	0.0236	0.216	0.4006	DOR:NOR	C18:pos	Oi1695000	C9 H16 O3	172.11	9.061	NA	S15496	HMDB0040165	-1e-04	-0.5984	10	Organic acids and derivatives	Keto acids and derivatives	Gamma-keto acids and derivatives	other
9.066_186.1257	0.0439	0.2094	0.4006	DOR:NOR	C18:pos	1,3,3-trimethyl-2-oxabicyclo[2.2.2]octane-6,7-diol	C10 H18 O3	186.126	9.066	NA	S102967	HMDB0041376	-1e-04	-0.5446	13	Organoheterocyclic compounds	Oxanes	null	other
9.069_108.0939	0.229	0.3024	0.4372	DOR:NOR	C18:pos	(z)-1,3-octadiene	C8 H12	108.094	9.069	NA	S29321019	HMDB0061897	0	-0.3659	1	Hydrocarbons	Unsaturated hydrocarbons	Olefins	other
9.07_360.2271	0.0115	0.177	0.3915	DOR:NOR	C18:pos	NA	C18 H28 N6 O2	360.227	9.07	NA	NA	NA	NA	NA	0	NA	NA	NA	other
9.072_136.0889	0.3008	0.2984	0.437	DOR:NOR	C18:pos	4329	C9 H12 O	136.089	9.072	NA	S10248	HMDB0032544	-1e-04	-0.577	22	Benzenoids	Benzene and substituted derivatives	Phenols and derivatives	other
9.081_384.2272	0.0326	0.2199	0.4006	DOR:NOR	C18:pos	NA	C19 H32 N2 O6	384.227	9.081	NA	NA	NA	NA	NA	0	NA	NA	NA	other
9.082_440.3287	0.0439	0.2318	0.4028	DOR:NOR	C18:pos	(2r)-2-[(3z,7e,11z)-13-hydroxy-4,8,12-trimethyl-3,7,11-tridecatrien-1-yl]-2,5,7,8-tetramethyl-6-chromanol	C29 H44 O3	440.329	9.082	NA	S30776634	HMDB0012560	3e-04	0.7247	1	Lipids and lipid-like molecules	Prenol lipids	Quinone and hydroquinone lipids	other
9.082_480.3216	0.0765	0.3281	0.4421	DOR:NOR	C18:pos	2-hydroxy-3-(phosphonooxy)propyl 18-methylicosanoate	C24 H49 O7 P	480.322	9.082	NA	S74851462	HMDB0114761	0	-0.0996	2	Lipids and lipid-like molecules	Glycerophospholipids	Glycerophosphates	other
9.083_363.2759	1.1962	0.3793	0.4718	DOR:NOR	C18:pos	(+/-)5(6)-eet ethanolamide	C22 H37 N O3	363.276	9.083	NA	M4737	NA	0.0015	3.9934	5	NA	NA	NA	other
9.084_314.1665	4.5313	0.8549	0.8778	DOR:NOR	C18:pos	NA	C15 H26 N2 O3 S	314.166	9.084	NA	NA	NA	NA	NA	0	NA	NA	NA	other
9.086_258.2305	3.5719	0.4968	0.5694	DOR:NOR	C18:pos	NA	C14 H30 N2 O2	258.231	9.086	NA	NA	NA	NA	NA	0	NA	NA	NA	other
9.086_320.2328	0.6891	0.4855	0.5594	DOR:NOR	C18:pos	NA	C16 H28 N6 O	320.233	9.086	NA	NA	NA	NA	NA	0	NA	NA	NA	other
9.088_280.24	0.6507	0.5338	0.6037	DOR:NOR	C18:pos	2210856	C18 H32 O2	280.24	9.088	NA	S4445609	HMDB0006270	3e-04	1.0042	12	Lipids and lipid-like molecules	Fatty Acyls	Lineolic acids and derivatives	other
9.093_310.2505	0.1146	0.3051	0.4385	DOR:NOR	C18:pos	2-hydroxy-8-(2-octyl-1-cyclopropen-1-yl)octanoic acid	C19 H34 O3	310.25	9.093	NA	S35013309	HMDB0031060	3e-04	0.8288	1	Lipids and lipid-like molecules	Fatty Acyls	Fatty alcohols	other
9.101_213.2093	1.7883	0.5624	0.6288	DOR:NOR	C18:pos	NA	C13 H27 N O	213.209	9.101	NA	NA	NA	NA	NA	0	NA	NA	NA	other
9.101_358.2112	0.0112	0.2056	0.4002	DOR:NOR	C18:pos	NA	C18 H26 N6 O2	358.211	9.101	NA	NA	NA	NA	NA	0	NA	NA	NA	other
9.103_397.2247	1.5685	0.6379	0.694	DOR:NOR	C18:pos	Drotaverine	C24 H31 N O4	397.225	9.103	NA	S1361582	HMDB0015669	6e-04	1.4048	1	Organoheterocyclic compounds	Tetrahydroisoquinolines	null	other
9.12_324.2381	13.416	0.3368	0.4471	DOR:NOR	C18:pos	NA	C13 H32 N4 O5	324.238	9.12	NA	NA	NA	NA	NA	0	NA	NA	NA	other
9.13_296.2348	0.1672	0.2448	0.4068	DOR:NOR	C18:pos	13s-hydroxyoctadecadienoic acid	C18 H32 O3	296.235	9.13	C14762	S4947055	HMDB0004667	3e-04	1.1168	10	Lipids and lipid-like molecules	Fatty Acyls	Lineolic acids and derivatives	other
9.141_312.2659	1.6011	0.1405	0.3713	DOR:NOR	C18:pos	NA	C19 H36 O3	312.266	9.141	NA	NA	NA	NA	NA	0	NA	NA	NA	other
9.142_394.269	0.0896	0.1865	0.3926	DOR:NOR	C18:pos	NA	C19 H34 N6 O3	394.269	9.142	NA	NA	NA	NA	NA	0	NA	NA	NA	other
9.147_298.2503	0.3702	0.2905	0.4319	DOR:NOR	C18:pos	Rg1300000	C18 H34 O3	298.25	9.147	C19418	S15081	HMDB0061650	5e-04	1.6667	8	Lipids and lipid-like molecules	Fatty Acyls	Lineolic acids and derivatives	other
9.153_466.3055	0.0178	0.001	0.0325	DOR:NOR	C18:pos	1-arachidoyl-sn-glycero-3-phosphate	C23 H47 O7 P	466.305	9.153	NA	S29368449	HMDB0062315	5e-04	0.986	1	Lipids and lipid-like molecules	Glycerophospholipids	Glycerophosphates	down
9.163_557.429	0.2297	0.1443	0.375	DOR:NOR	C18:pos	NA	C32 H63 N O2 S2	557.429	9.163	NA	NA	NA	NA	NA	0	NA	NA	NA	other
9.168_484.1052	2.4737	0.0114	0.1009	DOR:NOR	C18:pos	NA	NA	484.105	9.168	NA	NA	NA	NA	NA	0	NA	NA	NA	up
9.195_454.3056	0.008	0.1706	0.3907	DOR:NOR	C18:pos	NA	C26 H49 P3	454.306	9.195	NA	NA	NA	NA	NA	0	NA	NA	NA	other
9.196_414.3128	0.0174	0.1145	0.3399	DOR:NOR	C18:pos	9,19-cyclocholesta-7,20-diene-3,14,26-triol	C27 H42 O3	414.313	9.196	NA	S74886495	HMDB0041583	5e-04	1.3247	1	Lipids and lipid-like molecules	Steroids and steroid derivatives	Hydroxysteroids	other
9.197_214.157	0.0285	0.1573	0.3863	DOR:NOR	C18:pos	2-hexyltetrahydrofuran-4-yl acetate	C12 H22 O3	214.157	9.197	NA	S55379	HMDB0037398	-1e-04	-0.4354	2	Organoheterocyclic compounds	Tetrahydrofurans	null	other
9.198_146.1097	0.0558	0.2587	0.4136	DOR:NOR	C18:pos	3-methyl-1-phenyl-2-butene	C11 H14	146.11	9.198	NA	S19372	HMDB0061808	-1e-04	-0.9513	1	Benzenoids	Benzene and substituted derivatives	null	other
9.198_182.1309	0.0778	0.2603	0.4138	DOR:NOR	C18:pos	Ethyl 2-nonynoate	C11 H18 O2	182.131	9.198	NA	S55374	HMDB0036215	-2e-04	-1.064	18	Lipids and lipid-like molecules	Fatty Acyls	Fatty acid esters	other
9.198_339.2769	0.0115	0.2539	0.4101	DOR:NOR	C18:pos	Mfcd01320532	C20 H37 N O3	339.277	9.198	NA	S4941514	HMDB0013631	5e-04	1.3896	1	Organic acids and derivatives	Carboxylic acids and derivatives	Amino acids, peptides, and analogues	other
9.201_222.162	0.0273	0.2225	0.4006	DOR:NOR	C18:pos	2,6-di-tert-butylhydroquinone	C14 H22 O2	222.162	9.201	NA	S68075	HMDB0040178	0	-0.2142	6	Benzenoids	Benzene and substituted derivatives	Phenylpropanes	other
9.201_322.2479	3.0142	0.1533	0.385	DOR:NOR	C18:pos	NA	C16 H30 N6 O	322.248	9.201	NA	NA	NA	NA	NA	0	NA	NA	NA	other
9.201_362.2428	0.0062	0.2516	0.4078	DOR:NOR	C18:pos	NA	C18 H30 N6 O2	362.243	9.201	NA	NA	NA	NA	NA	0	NA	NA	NA	other
9.201_378.217	0.0325	0.2281	0.4009	DOR:NOR	C18:pos	Neotame	C20 H30 N2 O5	378.217	9.201	NA	S3032042	HMDB0034566	-0.0015	-4.0785	1	Organic acids and derivatives	Carboxylic acids and derivatives	Amino acids, peptides, and analogues	other
9.202_254.1881	0.0158	0.2823	0.429	DOR:NOR	C18:pos	2,6,10,10-tetramethyl-1-oxaspiro[4.5]dec-6-yl acetate	C15 H26 O3	254.188	9.202	NA	S84699	HMDB0040276	1e-04	0.4279	5	Organoheterocyclic compounds	Tetrahydrofurans	null	other
9.202_274.1542	0.0416	0.2653	0.4172	DOR:NOR	C18:pos	NA	C13 H18 N6 O	274.154	9.202	NA	NA	NA	NA	NA	0	NA	NA	NA	other
9.202_282.198	3.7826	0.4401	0.5176	DOR:NOR	C18:pos	Retinal 2	C20 H26 O	282.198	9.202	NA	S4444397	HMDB0035695	4e-04	1.3161	2	Lipids and lipid-like molecules	Prenol lipids	Retinoids	other
9.203_336.266	0.019	0.3781	0.4715	DOR:NOR	C18:pos	11-(3-methyl-5-pentyl-2-furyl)undecanoic acid	C21 H36 O3	336.266	9.203	NA	S9231983	HMDB0031005	4e-04	1.3344	8	Lipids and lipid-like molecules	Fatty Acyls	Fatty acids and conjugates	other
9.206_246.1618	0.0413	0.219	0.4006	DOR:NOR	C18:pos	(z)-?-amylcinnamyl acetate	C16 H22 O2	246.162	9.206	NA	S4522166	HMDB0036207	2e-04	0.7352	3	Benzenoids	Benzene and substituted derivatives	null	other
9.206_322.2503	0.0043	0.1547	0.3851	DOR:NOR	C18:pos	15s-hydroxyeicosatrienoic acid	C20 H34 O3	322.25	9.206	NA	S4446269	HMDB0005045	5e-04	1.4754	8	Lipids and lipid-like molecules	Fatty Acyls	Eicosanoids	other
9.206_440.327	0.0094	0	0.0066	DOR:NOR	C18:pos	(2r)-2-[(3z,7e,11z)-13-hydroxy-4,8,12-trimethyl-3,7,11-tridecatrien-1-yl]-2,5,7,8-tetramethyl-6-chromanol	C29 H44 O3	440.327	9.206	NA	S30776634	HMDB0012560	0.002	4.595	1	Lipids and lipid-like molecules	Prenol lipids	Quinone and hydroquinone lipids	down
9.206_493.3166	0.036	0.0114	0.1009	DOR:NOR	C18:pos	1-[(9z)-hexadecenoyl]-sn-glycero-3-phosphocholine	C24 H48 N O7 P	493.317	9.206	NA	S24766525	HMDB0010383	2e-04	0.4164	1	Lipids and lipid-like molecules	Glycerophospholipids	Glycerophosphocholines	down
9.209_206.1673	0.0528	0.1734	0.3915	DOR:NOR	C18:pos	513992	C14 H22 O	206.167	9.209	NA	S8483	HMDB0013825	-2e-04	-0.9983	11	Benzenoids	Benzene and substituted derivatives	Phenylpropanes	other
9.212_386.2428	0.0138	0.0826	0.2819	DOR:NOR	C18:pos	NA	C20 H30 N6 O2	386.243	9.212	NA	NA	NA	NA	NA	0	NA	NA	NA	other
9.213_328.2397	0.0319	0.0603	0.2385	DOR:NOR	C18:pos	Docosahexaenoic acid	C22 H32 O2	328.24	9.213	C06429	S393183	HMDB0002183	5e-04	1.5274	6	Lipids and lipid-like molecules	Fatty Acyls	Fatty acids and conjugates	other
9.213_346.2491	0.0265	0.0215	0.1439	DOR:NOR	C18:pos	NA	C18 H30 N6 O	346.249	9.213	NA	NA	NA	NA	NA	0	NA	NA	NA	down
9.216_199.194	2.2655	0.3328	0.4441	DOR:NOR	C18:pos	NA	C12 H25 N O	199.194	9.216	NA	NA	NA	NA	NA	0	NA	NA	NA	other
9.219_451.2694	0.0849	0.0505	0.2188	DOR:NOR	C18:pos	(2r)-3-{[(2-aminoethoxy)(hydroxy)phosphoryl]oxy}-2-hydroxypropyl (9z)-9-hexadecenoate	C21 H42 N O7 P	451.269	9.219	NA	S24769383	HMDB0011504	5e-04	1.0631	2	Lipids and lipid-like molecules	Glycerophospholipids	Glycerophosphoethanolamines	other
9.226_480.3216	0.1314	0.3744	0.4688	DOR:NOR	C18:pos	2-hydroxy-3-(phosphonooxy)propyl 18-methylicosanoate	C24 H49 O7 P	480.322	9.226	NA	S74851462	HMDB0114761	0	-0.0996	2	Lipids and lipid-like molecules	Glycerophospholipids	Glycerophosphates	other
9.231_330.2553	0.0264	0.0043	0.0668	DOR:NOR	C18:pos	Ethyl eicosapentaenoic acid	C22 H34 O2	330.255	9.231	NA	S8007147	HMDB0039530	6e-04	1.7368	8	Lipids and lipid-like molecules	Fatty Acyls	Fatty acid esters	down
9.24_409.3399	7.241	0.4295	0.5079	DOR:NOR	C18:pos	NA	C22 H43 N5 O2	409.34	9.24	NA	NA	NA	NA	NA	0	NA	NA	NA	other
9.241_414.2953	7.2886	0.5273	0.5982	DOR:NOR	C18:pos	NA	C19 H38 N6 O4	414.295	9.241	NA	NA	NA	NA	NA	0	NA	NA	NA	other
9.242_543.3329	0.0352	0.0025	0.0472	DOR:NOR	C18:pos	1-arachidonoyl-sn-glycero-3-phosphocholine	C28 H50 N O7 P	543.333	9.242	NA	S21403155	HMDB0010395	-5e-04	-0.8878	2	null	null	null	down
9.243_227.2249	2.1643	0.423	0.502	DOR:NOR	C18:pos	NA	C14 H29 N O	227.225	9.243	NA	NA	NA	NA	NA	0	NA	NA	NA	other
9.244_453.3663	8.3121	0.4016	0.4869	DOR:NOR	C18:pos	NA	C24 H47 N5 O3	453.366	9.244	NA	NA	NA	NA	NA	0	NA	NA	NA	other
9.244_458.3215	8.8592	0.4453	0.5231	DOR:NOR	C18:pos	NA	C23 H47 N4 O P S	458.322	9.244	NA	NA	NA	NA	NA	0	NA	NA	NA	other
9.244_673.4957	6.7251	0.6436	0.6979	DOR:NOR	C18:pos	NA	C34 H67 N5 O8	673.496	9.244	NA	NA	NA	NA	NA	0	NA	NA	NA	other
9.245_502.3486	6.7288	0.4046	0.4893	DOR:NOR	C18:pos	NA	C25 H51 N4 O2 P S	502.349	9.245	NA	NA	NA	NA	NA	0	NA	NA	NA	other
9.246_497.3927	5.7794	0.5772	0.6417	DOR:NOR	C18:pos	NA	C26 H51 N5 O4	497.393	9.246	NA	NA	NA	NA	NA	0	NA	NA	NA	other
9.246_541.4197	6.2237	0.5154	0.5873	DOR:NOR	C18:pos	NA	C28 H55 N5 O5	541.42	9.246	NA	NA	NA	NA	NA	0	NA	NA	NA	other
9.246_585.4449	5.8884	0.5407	0.6089	DOR:NOR	C18:pos	NA	C32 H66 N3 P3	585.445	9.246	NA	NA	NA	NA	NA	0	NA	NA	NA	other
9.246_629.4703	5.9097	0.5353	0.6044	DOR:NOR	C18:pos	NA	C32 H63 N5 O7	629.47	9.246	NA	NA	NA	NA	NA	0	NA	NA	NA	other
9.247_236.072	2.268	0.2061	0.4002	DOR:NOR	C18:pos	NA	NA	236.072	9.247	NA	NA	NA	NA	NA	0	NA	NA	NA	other
9.247_334.0879	2.8895	0.1839	0.3915	DOR:NOR	C18:pos	4-{[(e)-(4-chlorophenyl)(3-fluoro-6-oxo-2,4-cyclohexadien-1-ylidene)methyl]amino}butanamide	C17 H16 Cl F N2 O2	334.088	9.247	NA	S4514729	HMDB0014975	5e-04	1.5432	1	Organic oxygen compounds	Organooxygen compounds	Carbonyl compounds	other
9.247_546.3754	8.1336	0.4724	0.5473	DOR:NOR	C18:pos	Didodecyl 3,3'-disulfanediyldipropanoate	C30 H58 O4 S2	546.375	9.247	NA	S30777257	HMDB0038474	0.0022	4.047	1	Organic acids and derivatives	Carboxylic acids and derivatives	Dicarboxylic acids and derivatives	other
9.252_351.2379	5.1126	0.1355	0.3648	DOR:NOR	C18:pos	NA	C17 H40 N P3	351.238	9.252	NA	NA	NA	NA	NA	0	NA	NA	NA	other
9.254_519.3329	0.0461	0.0413	0.1942	DOR:NOR	C18:pos	1-linoleoyl-sn-glycero-3-phosphocholine	C26 H50 N O7 P	519.333	9.254	NA	S9181014	HMDB0010386	-4e-04	-0.8213	2	Lipids and lipid-like molecules	Glycerophospholipids	Glycerophosphocholines	down
9.256_494.3372	0.0239	0.2242	0.4006	DOR:NOR	C18:pos	(2r)-2-hydroxy-3-(phosphonooxy)propyl docosanoate	C25 H51 O7 P	494.337	9.256	NA	S59664367	HMDB0062314	0	0.0894	2	Lipids and lipid-like molecules	Glycerophospholipids	Glycerophosphates	other
9.257_501.286	0.0483	0.058	0.2348	DOR:NOR	C18:pos	2-arachidonyl-sn-glycero-3-phosphoethanolamine	C25 H44 N O7 P	501.286	9.257	NA	S24769368	HMDB0011487	-4e-04	-0.8011	4	Lipids and lipid-like molecules	Glycerophospholipids	Glycerophosphoethanolamines	other
9.269_477.2856	0.0574	0.0253	0.1571	DOR:NOR	C18:pos	1-linoleoyl-sn-glycero-3-phosphoethanolamine	C23 H44 N O7 P	477.286	9.269	NA	S24769385	HMDB0011507	0	-0.0305	2	Lipids and lipid-like molecules	Glycerophospholipids	Glycerophosphoethanolamines	down
9.273_277.2401	1.1454	0.5418	0.6098	DOR:NOR	C18:pos	NA	C18 H31 N O	277.24	9.273	NA	NA	NA	NA	NA	0	NA	NA	NA	other
9.278_501.3666	2.363	0.5335	0.6037	DOR:NOR	C18:pos	NA	C27 H51 N O7	501.367	9.278	NA	NA	NA	NA	NA	0	NA	NA	NA	other
9.278_506.3223	1.9669	0.7587	0.7961	DOR:NOR	C18:pos	NA	C25 H52 N2 O2 P2 S	506.322	9.278	NA	NA	NA	NA	NA	0	NA	NA	NA	other
9.279_589.4189	1.8531	0.7211	0.7663	DOR:NOR	C18:pos	NA	C32 H55 N5 O5	589.419	9.279	NA	NA	NA	NA	NA	0	NA	NA	NA	other
9.28_545.3935	2.0468	0.6155	0.6734	DOR:NOR	C18:pos	NA	C29 H55 N O8	545.394	9.28	NA	NA	NA	NA	NA	0	NA	NA	NA	other
9.282_299.2221	1.0982	0.5593	0.6262	DOR:NOR	C18:pos	NA	C15 H29 N3 O3	299.222	9.282	NA	NA	NA	NA	NA	0	NA	NA	NA	other
9.286_389.0994	0.9094	0.6117	0.6698	DOR:NOR	C18:pos	NA	NA	389.099	9.286	NA	NA	NA	NA	NA	0	NA	NA	NA	other
9.288_346.2494	0.0181	0.0708	0.2568	DOR:NOR	C18:pos	6-(pentadeca-(8e)-enyl)salicylic acid	C22 H34 O3	346.249	9.288	NA	S4476443	HMDB0033897	0.0014	4.0157	6	Benzenoids	Benzene and substituted derivatives	Benzoic acids and derivatives	other
9.295_199.1939	2.3447	0.3677	0.4619	DOR:NOR	C18:pos	NA	C12 H25 N O	199.194	9.295	NA	NA	NA	NA	NA	0	NA	NA	NA	other
9.295_386.243	0.0136	0.1062	0.3276	DOR:NOR	C18:pos	NA	C20 H30 N6 O2	386.243	9.295	NA	NA	NA	NA	NA	0	NA	NA	NA	other
9.304_302.2455	0.0787	0.0275	0.1639	DOR:NOR	C18:pos	Glyceryl 2-myristate	C17 H34 O4	302.245	9.304	NA	S121585	HMDB0011530	2e-04	0.8079	4	Lipids and lipid-like molecules	Glycerolipids	Monoradylglycerols	down
9.306_284.2346	0.1549	0.0413	0.1942	DOR:NOR	C18:pos	16-heptadecyne-1,2,4-triol	C17 H32 O3	284.235	9.306	NA	S2283375	HMDB0035473	5e-04	1.7654	2	Lipids and lipid-like molecules	Fatty Acyls	Fatty alcohols	down
9.313_481.3166	0.9857	0.9211	0.9341	DOR:NOR	C18:pos	1-stearoyl-sn-glycero-3-phosphoethanolamine	C23 H48 N O7 P	481.317	9.313	C21484	S7826018	HMDB0011130	3e-04	0.5341	3	Lipids and lipid-like molecules	Glycerophospholipids	Glycerophosphoethanolamines	other
9.318_525.2855	0.1671	0.0915	0.3028	DOR:NOR	C18:pos	Lysophosphatidylethanolamine (22:6(4z,7z,10z,13z,16z,19z)/0:0)	C27 H44 N O7 P	525.285	9.318	NA	S24769403	HMDB0011526	0	0.0366	2	Lipids and lipid-like molecules	Glycerophospholipids	Glycerophosphoethanolamines	other
9.318_90.047	1.2991	0.0973	0.3155	DOR:NOR	C18:pos	NA	C7 H6	90.047	9.318	NA	NA	NA	NA	NA	0	NA	NA	NA	other
9.321_132.0938	1.2533	0.3255	0.4414	DOR:NOR	C18:pos	3144	C10 H12	132.094	9.321	NA	S56173	HMDB0029641	1e-04	0.9445	1	Benzenoids	Benzene and substituted derivatives	Phenylpropenes	other
9.321_529.3405	1.2985	0.274	0.4228	DOR:NOR	C18:pos	NA	C25 H48 N5 O5 P	529.341	9.321	NA	NA	NA	NA	NA	0	NA	NA	NA	other
9.321_543.3563	1.6068	0.1452	0.3756	DOR:NOR	C18:pos	NA	C31 H50 N3 O3 P	543.356	9.321	NA	NA	NA	NA	NA	0	NA	NA	NA	other
9.321_552.3204	1.4057	0.0901	0.3008	DOR:NOR	C18:pos	NA	C29 H48 N2 O6 S	552.32	9.321	NA	NA	NA	NA	NA	0	NA	NA	NA	other
9.321_559.3499	1.3404	0.39	0.4768	DOR:NOR	C18:pos	NA	C26 H50 N5 O6 P	559.35	9.321	NA	NA	NA	NA	NA	0	NA	NA	NA	other
9.321_584.2062	1.3212	0.3474	0.4502	DOR:NOR	C18:pos	NA	C25 H39 N4 O6 P3	584.206	9.321	NA	NA	NA	NA	NA	0	NA	NA	NA	other
9.321_990.5447	0.9731	0.8511	0.8743	DOR:NOR	C18:pos	NA	C56 H74 N6 O10	990.545	9.321	NA	NA	NA	NA	NA	0	NA	NA	NA	other
9.322_336.1932	1.2894	0.3387	0.4473	DOR:NOR	C18:pos	NA	C19 H28 O5	336.193	9.322	NA	NA	NA	NA	NA	0	NA	NA	NA	other
9.322_484.2825	1.2679	0.2912	0.4319	DOR:NOR	C18:pos	NA	C29 H40 O6	484.283	9.322	NA	NA	NA	NA	NA	0	NA	NA	NA	other
9.324_543.3332	0.0902	0.0076	0.0849	DOR:NOR	C18:pos	1-arachidonoyl-sn-glycero-3-phosphocholine	C28 H50 N O7 P	543.333	9.324	NA	S21403155	HMDB0010395	-8e-04	-1.4272	2	null	null	null	down
9.326_297.2664	0.0412	0.0002	0.0167	DOR:NOR	C18:pos	Palmitoleoyl ethanolamide	C18 H35 N O2	297.266	9.326	NA	S8011589	HMDB0013648	4e-04	1.3809	1	Organic nitrogen compounds	Organonitrogen compounds	Amines	down
9.331_374.2428	0.1482	0.0141	0.1135	DOR:NOR	C18:pos	NA	C19 H30 N6 O2	374.243	9.331	NA	NA	NA	NA	NA	0	NA	NA	NA	down
9.337_171.126	4.9602	0.0397	0.1911	DOR:NOR	C18:pos	Gabapentin	C9 H17 N O2	171.126	9.337	NA	S3328	HMDB0005015	-1e-04	-0.4069	1	Organic acids and derivatives	Carboxylic acids and derivatives	Amino acids, peptides, and analogues	up
9.337_501.2862	0.141	0.153	0.385	DOR:NOR	C18:pos	2-arachidonyl-sn-glycero-3-phosphoethanolamine	C25 H44 N O7 P	501.286	9.337	NA	S24769368	HMDB0011487	-6e-04	-1.2958	4	Lipids and lipid-like molecules	Glycerophospholipids	Glycerophosphoethanolamines	other
9.34_202.1359	1.5925	0.0074	0.0841	DOR:NOR	C18:pos	Jasmonal	C14 H18 O	202.136	9.34	NA	S1361549	HMDB0031313	-1e-04	-0.6718	6	Phenylpropanoids and polyketides	Cinnamaldehydes	null	up
9.34_351.2379	6.7458	0.021	0.1421	DOR:NOR	C18:pos	NA	C15 H33 N3 O6	351.238	9.34	NA	NA	NA	NA	NA	0	NA	NA	NA	up
9.34_380.3074	0.0278	0.1946	0.396	DOR:NOR	C18:pos	NA	C21 H41 N4 P	380.307	9.34	NA	NA	NA	NA	NA	0	NA	NA	NA	other
9.34_398.3182	0.0348	0.1794	0.3915	DOR:NOR	C18:pos	NA	C21 H43 N4 O P	398.318	9.34	NA	NA	NA	NA	NA	0	NA	NA	NA	other
9.342_312.2661	0.2539	0.2334	0.4037	DOR:NOR	C18:pos	NA	C19 H36 O3	312.266	9.342	NA	NA	NA	NA	NA	0	NA	NA	NA	other
9.345_241.2042	0.0265	0.1979	0.396	DOR:NOR	C18:pos	NA	C14 H27 N O2	241.204	9.345	NA	NA	NA	NA	NA	0	NA	NA	NA	other
9.345_262.2296	0.1685	0.1634	0.3874	DOR:NOR	C18:pos	(5e,9z)-farnesyl acetone	C18 H30 O	262.23	9.345	NA	S1361471	HMDB0034495	1e-04	0.4581	2	Lipids and lipid-like molecules	Prenol lipids	Diterpenoids	other
9.345_298.2508	0.1518	0.1832	0.3915	DOR:NOR	C18:pos	Rg1300000	C18 H34 O3	298.251	9.345	C19418	S15081	HMDB0061650	0	0.032	8	Lipids and lipid-like molecules	Fatty Acyls	Lineolic acids and derivatives	other
9.346_519.3328	0.0781	0.0301	0.171	DOR:NOR	C18:pos	1-linoleoyl-sn-glycero-3-phosphocholine	C26 H50 N O7 P	519.333	9.346	NA	S9181014	HMDB0010386	-3e-04	-0.6444	2	Lipids and lipid-like molecules	Glycerophospholipids	Glycerophosphocholines	down
9.347_275.1859	0.0444	0.1982	0.396	DOR:NOR	C18:pos	NA	C12 H25 N3 O4	275.186	9.347	NA	NA	NA	NA	NA	0	NA	NA	NA	other
9.348_213.173	0.0331	0.1804	0.3915	DOR:NOR	C18:pos	NA	C12 H23 N O2	213.173	9.348	NA	NA	NA	NA	NA	0	NA	NA	NA	other
9.35_398.3501	1.4406	0.3129	0.4406	DOR:NOR	C18:pos	NA	C23 H46 N2 O3	398.35	9.35	NA	NA	NA	NA	NA	0	NA	NA	NA	other
9.351_289.2402	7.5289	0.398	0.4834	DOR:NOR	C18:pos	NA	C19 H31 N O	289.24	9.351	NA	NA	NA	NA	NA	0	NA	NA	NA	other
9.351_294.1954	8.3017	0.2478	0.4068	DOR:NOR	C18:pos	Proxymetacaine	C16 H26 N2 O3	294.195	9.351	NA	S4766	HMDB0014945	-0.0011	-3.6885	1	Benzenoids	Benzene and substituted derivatives	Benzoic acids and derivatives	other
9.351_438.3108	0.0216	0.1028	0.323	DOR:NOR	C18:pos	NA	C23 H43 N4 O2 P	438.311	9.351	NA	NA	NA	NA	NA	0	NA	NA	NA	other
9.353_364.2585	0.0833	0.2537	0.4101	DOR:NOR	C18:pos	NA	C18 H32 N6 O2	364.259	9.353	NA	NA	NA	NA	NA	0	NA	NA	NA	other
9.355_253.2403	0.7665	0.9059	0.9216	DOR:NOR	C18:pos	NA	C16 H31 N O	253.24	9.355	NA	NA	NA	NA	NA	0	NA	NA	NA	other
9.355_359.3035	0.1817	0.2195	0.4006	DOR:NOR	C18:pos	NA	C21 H37 N5	359.303	9.355	NA	NA	NA	NA	NA	0	NA	NA	NA	other
9.356_527.3016	0.0653	0.0405	0.1937	DOR:NOR	C18:pos	(2r)-3-{[(2-aminoethoxy)(hydroxy)phosphoryl]oxy}-2-hydroxypropyl (7z,10z,13z,16z,19z)-7,10,13,16,19-docosapentaenoate	C27 H46 N O7 P	527.302	9.356	NA	S24769402	HMDB0011525	-3e-04	-0.661	4	Lipids and lipid-like molecules	Glycerophospholipids	Glycerophosphoethanolamines	down
9.358_332.2713	0.0512	0.026	0.1594	DOR:NOR	C18:pos	Docosatetraenoic acid	C22 H36 O2	332.271	9.358	C16527	S4593749	HMDB0002226	2e-04	0.6837	6	Lipids and lipid-like molecules	Fatty Acyls	Fatty acids and conjugates	down
9.359_477.2855	0.1117	0.0507	0.2188	DOR:NOR	C18:pos	1-linoleoyl-sn-glycero-3-phosphoethanolamine	C23 H44 N O7 P	477.286	9.359	NA	S24769385	HMDB0011507	1e-04	0.2228	2	Lipids and lipid-like molecules	Glycerophospholipids	Glycerophosphoethanolamines	other
9.36_391.3058	0.0135	0.236	0.404	DOR:NOR	C18:pos	NA	C19 H41 N3 O5	391.306	9.36	NA	NA	NA	NA	NA	0	NA	NA	NA	other
9.361_383.3394	0.0478	0.2098	0.4006	DOR:NOR	C18:pos	NA	C23 H45 N O3	383.339	9.361	NA	NA	NA	NA	NA	0	NA	NA	NA	other
9.363_315.2227	0.0653	0.2182	0.4006	DOR:NOR	C18:pos	NA	C17 H33 N O2 S	315.223	9.363	NA	NA	NA	NA	NA	0	NA	NA	NA	other
9.363_348.2653	0.0868	0.138	0.3685	DOR:NOR	C18:pos	Anacardic acid	C22 H36 O3	348.265	9.363	NA	S146579	HMDB0029683	0.0012	3.3351	5	Benzenoids	Benzene and substituted derivatives	Benzoic acids and derivatives	other
9.378_227.1886	0.2785	0.2505	0.4075	DOR:NOR	C18:pos	NA	C13 H25 N O2	227.189	9.378	NA	NA	NA	NA	NA	0	NA	NA	NA	other
9.378_667.4052	0.0342	0.2201	0.4006	DOR:NOR	C18:pos	NA	C36 H64 N O4 P3	667.405	9.378	NA	NA	NA	NA	NA	0	NA	NA	NA	other
9.379_324.2655	0.1001	0.1168	0.3427	DOR:NOR	C18:pos	1,2-dideoxy-3-c-methyl-1-(2,5,5,8a-tetramethyl-1,4,4a,5,6,7,8,8a-octahydro-1-naphthalenyl)pentitol	C20 H36 O3	324.265	9.379	NA	S301536	HMDB0034958	9e-04	2.8034	3	Lipids and lipid-like molecules	Prenol lipids	Diterpenoids	other
9.382_468.3213	0.0075	0.1964	0.396	DOR:NOR	C18:pos	NA	C25 H44 N2 O6	468.321	9.382	NA	NA	NA	NA	NA	0	NA	NA	NA	other
9.383_414.3129	0.1011	0.1764	0.3915	DOR:NOR	C18:pos	9,19-cyclocholesta-7,20-diene-3,14,26-triol	C27 H42 O3	414.313	9.383	NA	S74886495	HMDB0041583	5e-04	1.0992	1	Lipids and lipid-like molecules	Steroids and steroid derivatives	Hydroxysteroids	other
9.385_210.1986	0.3936	0.0719	0.2589	DOR:NOR	C18:pos	(2e)-2-tetradecenal	C14 H26 O	210.199	9.385	NA	S4446487	HMDB0032525	-2e-04	-0.881	2	Lipids and lipid-like molecules	Fatty Acyls	Fatty aldehydes	other
9.385_302.2454	0.1871	0.0059	0.076	DOR:NOR	C18:pos	Rac-glycerol 1-myristate	C17 H34 O4	302.245	9.385	NA	BGI498	NA	3e-04	1.1146	4	NA	NA	NA	down
9.387_375.3108	2.0435	0.0678	0.2509	DOR:NOR	C18:pos	NA	C19 H41 N3 O4	375.311	9.387	NA	NA	NA	NA	NA	0	NA	NA	NA	other
9.388_335.3183	2.1165	0.0577	0.2347	DOR:NOR	C18:pos	(2e,4z)-n-isobutyl-2,4-octadecadienamide	C22 H41 N O	335.318	9.388	NA	S30776913	HMDB0031678	5e-04	1.4615	1	Lipids and lipid-like molecules	Fatty Acyls	Fatty amides	other
9.394_261.1702	0.0624	0.2869	0.431	DOR:NOR	C18:pos	NA	NA	261.17	9.394	NA	NA	NA	NA	NA	0	NA	NA	NA	other
9.395_374.2428	0.0972	0.0288	0.1673	DOR:NOR	C18:pos	NA	C18 H34 N2 O6	374.243	9.395	NA	NA	NA	NA	NA	0	NA	NA	NA	down
9.4_351.3132	1.7735	0.1589	0.3863	DOR:NOR	C18:pos	NA	C22 H41 N O2	351.313	9.4	NA	NA	NA	NA	NA	0	NA	NA	NA	other
9.402_236.214	0.2894	0.1065	0.3283	DOR:NOR	C18:pos	3a,6,6,9a-tetramethylperhydronaphtho[2,1-b]furan	C16 H28 O	236.214	9.402	NA	S96437	HMDB0036831	1e-04	0.3163	2	Organoheterocyclic compounds	Naphthofurans	null	other
9.405_328.2609	0.0319	0.0108	0.0983	DOR:NOR	C18:pos	2,4-dihydroxyheptadec-16-enyl acetate	C19 H36 O4	328.261	9.405	NA	S2859785	HMDB0031043	4e-04	1.3314	5	Lipids and lipid-like molecules	Fatty Acyls	Fatty alcohols	down
9.413_178.0631	1.8305	0.0409	0.1942	DOR:NOR	C18:pos	(e)-4-methoxycinnamic acid	C10 H10 O3	178.063	9.413	NA	S609479	HMDB0002040	-1e-04	-0.6973	24	Phenylpropanoids and polyketides	Cinnamic acids and derivatives	Cinnamic acids	up
9.415_636.7983	43.8695	0.3568	0.4557	DOR:NOR	C18:pos	NA	NA	636.798	9.415	NA	NA	NA	NA	NA	0	NA	NA	NA	other
9.416_681.3535	67.3126	0.221	0.4006	DOR:NOR	C18:pos	NA	C35 H57 N O8 P2	681.354	9.416	NA	NA	NA	NA	NA	0	NA	NA	NA	other
9.416_695.3692	375.801	0.2406	0.4048	DOR:NOR	C18:pos	NA	C33 H54 N5 O9 P	695.369	9.416	NA	NA	NA	NA	NA	0	NA	NA	NA	other
9.417_636.297	474.209	0.1996	0.396	DOR:NOR	C18:pos	NA	C33 H50 O8 P2	636.297	9.417	NA	NA	NA	NA	NA	0	NA	NA	NA	other
9.417_720.2486	44.4898	0.3587	0.4564	DOR:NOR	C18:pos	NA	C38 H37 N6 O7 P	720.249	9.417	NA	NA	NA	NA	NA	0	NA	NA	NA	other
9.417_726.2652	55.0216	0.2628	0.4156	DOR:NOR	C18:pos	NA	C37 H48 N2 O7 P2 S	726.265	9.417	NA	NA	NA	NA	NA	0	NA	NA	NA	other
9.417_736.2211	110.621	0.2889	0.4312	DOR:NOR	C18:pos	NA	C38 H41 Cl N2 O9 S	736.221	9.417	NA	NA	NA	NA	NA	0	NA	NA	NA	other
9.42_547.294	68.7106	0.3623	0.4588	DOR:NOR	C18:pos	NA	C32 H42 N3 O3 P	547.294	9.42	NA	NA	NA	NA	NA	0	NA	NA	NA	other
9.422_639.3743	0.0566	0.2565	0.4127	DOR:NOR	C18:pos	NA	C30 H58 N O11 P	639.374	9.422	NA	NA	NA	NA	NA	0	NA	NA	NA	other
9.424_649.3943	0.0303	0.2392	0.4048	DOR:NOR	C18:pos	NA	C36 H62 N O3 P3	649.394	9.424	NA	NA	NA	NA	NA	0	NA	NA	NA	other
9.424_665.3898	0.0394	0.2653	0.4172	DOR:NOR	C18:pos	NA	C33 H56 N5 O7 P	665.39	9.424	NA	NA	NA	NA	NA	0	NA	NA	NA	other
9.428_623.3788	0.0214	0.2501	0.4074	DOR:NOR	C18:pos	NA	C30 H58 N O10 P	623.379	9.428	NA	NA	NA	NA	NA	0	NA	NA	NA	other
9.429_677.3868	0.058	0.2485	0.4068	DOR:NOR	C18:pos	NA	C27 H61 N5 O10 P2	677.387	9.429	NA	NA	NA	NA	NA	0	NA	NA	NA	other
9.431_663.374	0.0416	0.2445	0.4068	DOR:NOR	C18:pos	NA	C28 H64 N3 O6 P3 S	663.374	9.431	NA	NA	NA	NA	NA	0	NA	NA	NA	other
9.434_527.3016	0.2141	0.1571	0.3863	DOR:NOR	C18:pos	(2r)-3-{[(2-aminoethoxy)(hydroxy)phosphoryl]oxy}-2-hydroxypropyl (7z,10z,13z,16z,19z)-7,10,13,16,19-docosapentaenoate	C27 H46 N O7 P	527.302	9.434	NA	S24769402	HMDB0011525	-4e-04	-0.6689	4	Lipids and lipid-like molecules	Glycerophospholipids	Glycerophosphoethanolamines	other
9.443_482.3374	0.0371	0.231	0.4017	DOR:NOR	C18:pos	5-hydroxy-4-(2-methylbutanoyl)-2,2,6,6-tetrakis(3-methyl-2-buten-1-yl)-4-cyclohexene-1,3-dione	C31 H46 O4	482.337	9.443	NA	S35013446	HMDB0032111	0.0022	4.4576	1	Organic oxygen compounds	Organooxygen compounds	Carbonyl compounds	other
9.446_687.5113	1.6214	0.6518	0.7048	DOR:NOR	C18:pos	NA	C35 H69 N5 O8	687.511	9.446	NA	NA	NA	NA	NA	0	NA	NA	NA	other
9.447_468.2849	0.0284	0.1037	0.3244	DOR:NOR	C18:pos	NA	C25 H46 N2 P2 S	468.285	9.447	NA	NA	NA	NA	NA	0	NA	NA	NA	other
9.449_274.2505	1.6493	0.0857	0.2893	DOR:NOR	C18:pos	NA	C16 H34 O3	274.25	9.449	NA	NA	NA	NA	NA	0	NA	NA	NA	other
9.449_595.3485	0.0292	0.2116	0.4006	DOR:NOR	C18:pos	NA	C32 H56 N O3 P3	595.348	9.449	NA	NA	NA	NA	NA	0	NA	NA	NA	other
9.45_643.486	1.5883	0.6339	0.6903	DOR:NOR	C18:pos	NA	C36 H71 N O4 P2	643.486	9.45	NA	NA	NA	NA	NA	0	NA	NA	NA	other
9.452_599.4607	1.5697	0.7684	0.8049	DOR:NOR	C18:pos	NA	C31 H61 N5 O6	599.461	9.452	NA	NA	NA	NA	NA	0	NA	NA	NA	other
9.455_555.4338	1.716	0.6951	0.7434	DOR:NOR	C18:pos	NA	C29 H57 N5 O5	555.434	9.455	NA	NA	NA	NA	NA	0	NA	NA	NA	other
9.456_560.3895	1.5754	0.7539	0.7918	DOR:NOR	C18:pos	NA	C26 H52 N6 O7	560.389	9.456	NA	NA	NA	NA	NA	0	NA	NA	NA	other
9.457_511.4084	1.7294	0.6581	0.7103	DOR:NOR	C18:pos	NA	C27 H53 N5 O4	511.408	9.457	NA	NA	NA	NA	NA	0	NA	NA	NA	other
9.457_511.4964	0.9089	0.9485	0.955	DOR:NOR	C18:pos	N-tetradecanoylsphinganine	C32 H65 N O3	511.496	9.457	NA	S8431308	HMDB0011759	1e-04	0.1457	1	Lipids and lipid-like molecules	Sphingolipids	Ceramides	other
9.458_340.2583	1.3892	0.4504	0.528	DOR:NOR	C18:pos	NA	C16 H32 N6 O2	340.258	9.458	NA	NA	NA	NA	NA	0	NA	NA	NA	other
9.458_384.2846	1.6012	0.6244	0.6819	DOR:NOR	C18:pos	NA	C18 H36 N6 O3	384.285	9.458	NA	NA	NA	NA	NA	0	NA	NA	NA	other
9.458_467.3818	1.6533	0.7321	0.7759	DOR:NOR	C18:pos	NA	C25 H49 N5 O3	467.382	9.458	NA	NA	NA	NA	NA	0	NA	NA	NA	other
9.458_472.3373	1.6959	0.7149	0.7611	DOR:NOR	C18:pos	NA	C22 H44 N6 O5	472.337	9.458	NA	NA	NA	NA	NA	0	NA	NA	NA	other
9.458_516.3641	1.6107	0.7789	0.8141	DOR:NOR	C18:pos	NA	C32 H54 O P2	516.364	9.458	NA	NA	NA	NA	NA	0	NA	NA	NA	other
9.459_379.3292	1.4006	0.7938	0.8259	DOR:NOR	C18:pos	NA	C21 H41 N5 O	379.329	9.459	NA	NA	NA	NA	NA	0	NA	NA	NA	other
9.459_423.3555	1.7067	0.672	0.7235	DOR:NOR	C18:pos	NA	C23 H45 N5 O2	423.356	9.459	NA	NA	NA	NA	NA	0	NA	NA	NA	other
9.46_428.3108	1.6275	0.7099	0.7565	DOR:NOR	C18:pos	NA	C20 H40 N6 O4	428.311	9.46	NA	NA	NA	NA	NA	0	NA	NA	NA	other
9.461_609.3628	0.0103	0.2579	0.4133	DOR:NOR	C18:pos	NA	C30 H52 N5 O6 P	609.363	9.461	NA	NA	NA	NA	NA	0	NA	NA	NA	other
9.465_437.4955	0.0499	0.0157	0.1201	DOR:NOR	C18:pos	NA	C30 H63 N	437.495	9.465	NA	NA	NA	NA	NA	0	NA	NA	NA	down
9.465_530.2674	65.5598	0.3959	0.4815	DOR:NOR	C18:pos	NA	C27 H39 N4 O5 P	530.267	9.465	NA	NA	NA	NA	NA	0	NA	NA	NA	other
9.467_323.2819	0.0576	0.0053	0.0719	DOR:NOR	C18:pos	Mfcd00674434	C20 H37 N O2	323.282	9.467	NA	S4446566	HMDB0012252	5e-04	1.584	1	Organic nitrogen compounds	Organonitrogen compounds	Amines	down
9.467_589.3403	48.6065	0.4372	0.5154	DOR:NOR	C18:pos	NA	C40 H47 N O S	589.34	9.467	NA	NA	NA	NA	NA	0	NA	NA	NA	other
9.47_324.2657	0.0624	0.1748	0.3915	DOR:NOR	C18:pos	1,2-dideoxy-3-c-methyl-1-(2,5,5,8a-tetramethyl-1,4,4a,5,6,7,8,8a-octahydro-1-naphthalenyl)pentitol	C20 H36 O3	324.266	9.47	NA	S301536	HMDB0034958	7e-04	2.2508	3	Lipids and lipid-like molecules	Prenol lipids	Diterpenoids	other
9.473_328.2609	0.0536	0.0058	0.0759	DOR:NOR	C18:pos	2,4-dihydroxyheptadec-16-enyl acetate	C19 H36 O4	328.261	9.473	NA	S2859785	HMDB0031043	5e-04	1.432	5	Lipids and lipid-like molecules	Fatty Acyls	Fatty alcohols	down
9.475_236.2139	0.1656	0.0122	0.1054	DOR:NOR	C18:pos	3a,6,6,9a-tetramethylperhydronaphtho[2,1-b]furan	C16 H28 O	236.214	9.475	NA	S96437	HMDB0036831	1e-04	0.4206	2	Organoheterocyclic compounds	Naphthofurans	null	down
9.475_703.4017	0.0159	0.1652	0.3874	DOR:NOR	C18:pos	NA	C30 H62 N3 O13 P	703.402	9.475	NA	NA	NA	NA	NA	0	NA	NA	NA	other
9.476_294.2166	1.5296	0.6656	0.7178	DOR:NOR	C18:pos	NA	C14 H26 N6 O	294.217	9.476	NA	NA	NA	NA	NA	0	NA	NA	NA	other
9.476_373.2952	1.4769	0.5903	0.6519	DOR:NOR	C18:pos	NA	C19 H39 N3 O4	373.295	9.476	NA	NA	NA	NA	NA	0	NA	NA	NA	other
9.478_382.1803	0.0365	0.009	0.0895	DOR:NOR	C18:pos	NA	C24 H22 N4 O	382.18	9.478	NA	NA	NA	NA	NA	0	NA	NA	NA	down
9.478_597.3639	0.0334	0.1608	0.3863	DOR:NOR	C18:pos	NA	C32 H58 N O3 P3	597.364	9.478	NA	NA	NA	NA	NA	0	NA	NA	NA	other
9.482_545.3488	0.0442	0.0063	0.0794	DOR:NOR	C18:pos	1-[(8z,11z,14z)-icosatrienoyl]-sn-glycero-3-phosphocholine	C28 H52 N O7 P	545.349	9.482	NA	S21403156	HMDB0010394	-7e-04	-1.2439	2	Lipids and lipid-like molecules	Glycerophospholipids	Glycerophosphocholines	down
9.482_649.3943	0.0201	0.1422	0.3734	DOR:NOR	C18:pos	NA	C27 H60 N3 O12 P	649.394	9.482	NA	NA	NA	NA	NA	0	NA	NA	NA	other
9.486_351.3132	2.0044	0.3236	0.4414	DOR:NOR	C18:pos	NA	C22 H41 N O2	351.313	9.486	NA	NA	NA	NA	NA	0	NA	NA	NA	other
9.488_402.2764	0.0323	0.0014	0.0364	DOR:NOR	C18:pos	1,3-dihydroxy-2-propanyl (4z,7z,10z,13z,16z,19z)-4,7,10,13,16,19-docosahexaenoate	C25 H38 O4	402.276	9.488	NA	S24765781	HMDB0011557	6e-04	1.4747	2	Lipids and lipid-like molecules	Glycerolipids	Monoradylglycerols	down
9.491_521.3486	0.0234	0.0071	0.0827	DOR:NOR	C18:pos	4033747	C26 H52 N O7 P	521.349	9.491	NA	S17240641	HMDB0002815	-4e-04	-0.8463	3	Lipids and lipid-like molecules	Glycerophospholipids	Glycerophosphocholines	down
9.491_543.3306	0.0114	0.0022	0.0455	DOR:NOR	C18:pos	1-arachidonoyl-sn-glycero-3-phosphocholine	C28 H50 N O7 P	543.331	9.491	NA	S21403155	HMDB0010395	0.0019	3.5062	2	null	null	null	down
9.492_503.3012	0.0704	0.0097	0.0922	DOR:NOR	C18:pos	2-[(5z,8z,11z)-icosatrienoyl]-sn-glycero-3-phosphoethanolamine	C25 H46 N O7 P	503.301	9.492	NA	S24769366	HMDB0011485	0	0.0268	6	Lipids and lipid-like molecules	Glycerophospholipids	Glycerophosphoethanolamines	down
9.492_522.352	0.0243	0.001	0.0317	DOR:NOR	C18:pos	NA	C23 H53 N6 O P3	522.352	9.492	NA	NA	NA	NA	NA	0	NA	NA	NA	down
9.493_324.3133	0.5966	0.6301	0.6874	DOR:NOR	C18:pos	NA	C20 H40 N2 O	324.313	9.493	NA	NA	NA	NA	NA	0	NA	NA	NA	other
9.495_350.2816	0.0332	0.1509	0.385	DOR:NOR	C18:pos	11-(3,4-dimethyl-5-pentyl-2-furyl)undecanoic acid	C22 H38 O3	350.282	9.495	NA	S23255373	HMDB0031126	5e-04	1.5181	2	Lipids and lipid-like molecules	Fatty Acyls	Fatty acids and conjugates	other
9.495_379.1802	0.5097	0.6025	0.6616	DOR:NOR	C18:pos	NA	C20 H29 N O4 S	379.18	9.495	NA	NA	NA	NA	NA	0	NA	NA	NA	other
9.495_633.3606	0.0208	0.1419	0.3734	DOR:NOR	C18:pos	NA	C30 H58 N3 O5 P3	633.361	9.495	NA	NA	NA	NA	NA	0	NA	NA	NA	other
9.496_279.2559	0.6982	0.6396	0.6955	DOR:NOR	C18:pos	Linoleamide	C18 H33 N O	279.256	9.496	NA	S4940587	HMDB0062656	3e-04	1.1712	1	Lipids and lipid-like molecules	Fatty Acyls	Fatty amides	other
9.496_334.2866	0.0396	0.1883	0.3926	DOR:NOR	C18:pos	(13z,16z,19z)-docosatrienoic acid	C22 H38 O2	334.287	9.496	NA	S4471982	HMDB0002823	6e-04	1.7735	2	Lipids and lipid-like molecules	Fatty Acyls	Fatty acids and conjugates	other
9.496_363.2078	0.4942	0.6439	0.6979	DOR:NOR	C18:pos	NA	C17 H35 N O3 P2	363.208	9.496	NA	NA	NA	NA	NA	0	NA	NA	NA	other
9.496_579.3531	0.0377	0.2458	0.4068	DOR:NOR	C18:pos	NA	C28 H54 N O9 P	579.353	9.496	NA	NA	NA	NA	NA	0	NA	NA	NA	other
9.501_338.1702	4.1188	0.1006	0.3197	DOR:NOR	C18:pos	NA	C16 H27 N4 P S	338.17	9.501	NA	NA	NA	NA	NA	0	NA	NA	NA	other
9.505_640.503	37.0138	0.001	0.032	DOR:NOR	C18:pos	NA	C38 H75 O P3	640.503	9.505	NA	NA	NA	NA	NA	0	NA	NA	NA	up
9.506_495.3325	0.0367	0.0069	0.0824	DOR:NOR	C18:pos	5385682	C24 H50 N O7 P	495.332	9.506	NA	S405287	HMDB0010382	0	-0.057	2	Lipids and lipid-like molecules	Glycerophospholipids	Glycerophosphocholines	down
9.506_585.3014	0.092	0.0217	0.1439	DOR:NOR	C18:pos	NA	C28 H50 N3 O4 P3	585.301	9.506	NA	NA	NA	NA	NA	0	NA	NA	NA	down
9.507_290.1877	2.226	0.0305	0.172	DOR:NOR	C18:pos	Octinoxate	C18 H26 O3	290.188	9.507	NA	S4511170	HMDB0061861	5e-04	1.7031	2	Phenylpropanoids and polyketides	Cinnamic acids and derivatives	Cinnamic acid esters	up
9.507_398.3179	0.1032	0.014	0.1132	DOR:NOR	C18:pos	NA	C27 H42 O2	398.318	9.507	NA	NA	NA	NA	NA	0	NA	NA	NA	down
9.508_338.2429	0.42	0.0515	0.219	DOR:NOR	C18:pos	NA	C16 H30 N6 O2	338.243	9.508	NA	NA	NA	NA	NA	0	NA	NA	NA	other
9.508_683.3368	0.0793	0.1745	0.3915	DOR:NOR	C18:pos	NA	C28 H56 N5 O8 P3	683.337	9.508	NA	NA	NA	NA	NA	0	NA	NA	NA	other
9.509_316.2609	0.345	0.0499	0.2184	DOR:NOR	C18:pos	Glyceryl 2-pentadecanoate	C18 H36 O4	316.261	9.509	NA	S467962	HMDB0011532	4e-04	1.4126	8	Lipids and lipid-like molecules	Glycerolipids	Monoradylglycerols	down
9.51_593.3688	0.0241	0.2262	0.4006	DOR:NOR	C18:pos	NA	C30 H52 N5 O5 P	593.369	9.51	NA	NA	NA	NA	NA	0	NA	NA	NA	other
9.51_647.3762	0.0157	0.2593	0.4138	DOR:NOR	C18:pos	NA	C36 H60 N O3 P3	647.376	9.51	NA	NA	NA	NA	NA	0	NA	NA	NA	other
9.512_378.2766	0.0291	0.0245	0.1545	DOR:NOR	C18:pos	2-arachidonoyl glycerol	C23 H38 O4	378.277	9.512	C13856	M4740	NA	4e-04	1.0634	7	Lipids and lipid-like molecules	Endocannabinoids	null	down
9.512_400.2586	0.0278	0.0449	0.2051	DOR:NOR	C18:pos	NA	C21 H32 N6 O2	400.259	9.512	NA	NA	NA	NA	NA	0	NA	NA	NA	down
9.513_241.2404	1.6796	0.9094	0.9244	DOR:NOR	C18:pos	NA	C15 H31 N O	241.24	9.513	NA	NA	NA	NA	NA	0	NA	NA	NA	other
9.516_453.2852	0.074	0.0537	0.2247	DOR:NOR	C18:pos	Glycerophospho-n-palmitoyl ethanolamine	C21 H44 N O7 P	453.285	9.516	NA	M2955	NA	4e-04	0.7991	2	NA	NA	NA	other
9.517_731.435	0.0276	0.151	0.385	DOR:NOR	C18:pos	NA	C37 H66 N O11 P	731.435	9.517	NA	NA	NA	NA	NA	0	NA	NA	NA	other
9.519_551.3227	0.039	0.2411	0.4049	DOR:NOR	C18:pos	NA	C25 H51 N3 O6 P2	551.323	9.519	NA	NA	NA	NA	NA	0	NA	NA	NA	other
9.527_384.2846	8.3537	0.2851	0.4305	DOR:NOR	C18:pos	NA	C18 H36 N6 O3	384.285	9.527	NA	NA	NA	NA	NA	0	NA	NA	NA	other
9.528_681.4196	0.0183	0.1576	0.3863	DOR:NOR	C18:pos	NA	C32 H66 N3 O6 P3	681.42	9.528	NA	NA	NA	NA	NA	0	NA	NA	NA	other
9.53_312.2296	6.0081	0.2508	0.4075	DOR:NOR	C18:pos	(10e,12z)-9-hydroperoxy-10,12-octadecadienoic acid	C18 H32 O4	312.23	9.53	NA	S4944227	HMDB0006940	5e-04	1.567	10	Lipids and lipid-like molecules	Fatty Acyls	Lineolic acids and derivatives	other
9.53_334.2116	6.1322	0.2289	0.401	DOR:NOR	C18:pos	NA	C15 H30 N2 O6	334.212	9.53	NA	NA	NA	NA	NA	0	NA	NA	NA	other
9.53_635.3787	0.0168	0.1856	0.3922	DOR:NOR	C18:pos	NA	C29 H59 N5 O4 P2 S	635.379	9.53	NA	NA	NA	NA	NA	0	NA	NA	NA	other
9.532_262.2296	0.0733	0.0007	0.0285	DOR:NOR	C18:pos	(5e,9z)-farnesyl acetone	C18 H30 O	262.23	9.532	NA	S1361471	HMDB0034495	1e-04	0.4556	2	Lipids and lipid-like molecules	Prenol lipids	Diterpenoids	down
9.532_354.2766	0.0282	0.027	0.1633	DOR:NOR	C18:pos	1715064	C21 H38 O4	354.277	9.532	NA	S4517636	HMDB0011538	4e-04	1.1663	2	Lipids and lipid-like molecules	Fatty Acyls	Lineolic acids and derivatives	down
9.532_408.196	0.029	0.0093	0.0903	DOR:NOR	C18:pos	(6beta,8xi,11beta,14xi,16alpha)-9-fluoro-6,11,17,21-tetrahydroxy-16-methylpregna-1,4-diene-3,20-dione	C22 H29 F O6	408.196	9.532	NA	S59662747	HMDB0061022	-0.0012	-2.8395	1	Lipids and lipid-like molecules	Steroids and steroid derivatives	Hydroxysteroids	down
9.533_254.2241	1.7201	0.0399	0.1918	DOR:NOR	C18:pos	Palmitelaidic acid	C16 H30 O2	254.224	9.533	NA	S4445872	HMDB0012328	5e-04	1.8138	13	Lipids and lipid-like molecules	Fatty Acyls	Fatty acids and conjugates	up
9.534_593.3328	0.0125	0.1858	0.3922	DOR:NOR	C18:pos	NA	C29 H48 N5 O6 P	593.333	9.534	NA	NA	NA	NA	NA	0	NA	NA	NA	other
9.535_351.3132	1.1081	0.8033	0.8333	DOR:NOR	C18:pos	NA	C22 H41 N O2	351.313	9.535	NA	NA	NA	NA	NA	0	NA	NA	NA	other
9.537_637.3943	0.0211	0.192	0.3953	DOR:NOR	C18:pos	NA	C31 H60 N O10 P	637.394	9.537	NA	NA	NA	NA	NA	0	NA	NA	NA	other
9.538_350.2817	0.0225	0.1778	0.3915	DOR:NOR	C18:pos	11-(3,4-dimethyl-5-pentyl-2-furyl)undecanoic acid	C22 H38 O3	350.282	9.538	NA	S23255373	HMDB0031126	4e-04	1.1865	2	Lipids and lipid-like molecules	Fatty Acyls	Fatty acids and conjugates	other
9.541_402.2766	0.0431	0.0364	0.1853	DOR:NOR	C18:pos	1,3-dihydroxy-2-propanyl (4z,7z,10z,13z,16z,19z)-4,7,10,13,16,19-docosahexaenoate	C25 H38 O4	402.277	9.541	NA	S24765781	HMDB0011557	4e-04	1.1173	2	Lipids and lipid-like molecules	Glycerolipids	Monoradylglycerols	down
9.543_256.2189	3.1481	0.6804	0.7307	DOR:NOR	C18:pos	NA	C19 H28	256.219	9.543	NA	NA	NA	NA	NA	0	NA	NA	NA	other
9.543_529.3172	0.0455	0.0312	0.1721	DOR:NOR	C18:pos	(2r)-3-{[(2-aminoethoxy)(hydroxy)phosphoryl]oxy}-2-hydroxypropyl (7z,10z,13z,16z)-7,10,13,16-docosatetraenoate	C27 H48 N O7 P	529.317	9.543	NA	S24769400	HMDB0011523	-4e-04	-0.6674	2	Lipids and lipid-like molecules	Glycerophospholipids	Glycerophosphoethanolamines	down
9.544_424.2585	0.0449	0.041	0.1942	DOR:NOR	C18:pos	1-heptadecanoyl-sn-glycero-3-phosphate	C20 H41 O7 P	424.259	9.544	NA	S25034490	HMDB0062318	5e-04	1.1114	1	Lipids and lipid-like molecules	Glycerophospholipids	Glycerophosphates	down
9.548_440.3263	0.0671	0.1981	0.396	DOR:NOR	C18:pos	NA	C25 H40 N6 O	440.326	9.548	NA	NA	NA	NA	NA	0	NA	NA	NA	other
9.553_400.3337	0.0416	0.1211	0.3468	DOR:NOR	C18:pos	7a-hydroxy-cholestene-3-one	C27 H44 O2	400.334	9.553	C05455	S110306	HMDB0001993	5e-04	1.1608	13	Lipids and lipid-like molecules	Steroids and steroid derivatives	Cholestane steroids	other
9.554_227.1885	6.5823	0.1007	0.3197	DOR:NOR	C18:pos	NA	C13 H25 N O2	227.189	9.554	NA	NA	NA	NA	NA	0	NA	NA	NA	other
9.556_375.3109	3.0857	0.0659	0.2509	DOR:NOR	C18:pos	NA	C19 H41 N3 O4	375.311	9.556	NA	NA	NA	NA	NA	0	NA	NA	NA	other
9.558_332.2322	10.6884	0.4038	0.4888	DOR:NOR	C18:pos	NA	C17 H28 N6 O	332.232	9.558	NA	NA	NA	NA	NA	0	NA	NA	NA	other
9.564_320.2332	0.5641	0.3133	0.4406	DOR:NOR	C18:pos	NA	C16 H36 N2 S2	320.233	9.564	NA	NA	NA	NA	NA	0	NA	NA	NA	other
9.565_286.2293	0.0932	0.0205	0.14	DOR:NOR	C18:pos	Vitamin a	C20 H30 O	286.229	9.565	NA	S393012	HMDB0000305	4e-04	1.4135	9	Lipids and lipid-like molecules	Prenol lipids	Retinoids	down
9.565_416.2324	0.0598	0.0131	0.1102	DOR:NOR	C18:pos	Tritace	C23 H32 N2 O5	416.232	9.565	NA	S4514937	HMDB0014324	-0.0013	-3.1928	1	Organic acids and derivatives	Carboxylic acids and derivatives	Amino acids, peptides, and analogues	down
9.567_395.303	0.0374	0.0343	0.1811	DOR:NOR	C18:pos	9,12-hexadecadienoylcarnitine	C23 H41 N O4	395.303	9.567	NA	S30776714	HMDB0013334	5e-04	1.3375	1	null	null	null	down
9.567_400.2585	0.0415	0.055	0.2279	DOR:NOR	C18:pos	NA	C21 H32 N6 O2	400.259	9.567	NA	NA	NA	NA	NA	0	NA	NA	NA	other
9.567_635.3507	2.2854	0.1187	0.3437	DOR:NOR	C18:pos	NA	C24 H54 N5 O12 P	635.351	9.567	NA	NA	NA	NA	NA	0	NA	NA	NA	other
9.568_618.3601	2.5495	0.0707	0.2568	DOR:NOR	C18:pos	NA	C31 H52 N6 O3 P2	618.36	9.568	NA	NA	NA	NA	NA	0	NA	NA	NA	other
9.57_527.3864	1.3743	0.0726	0.2609	DOR:NOR	C18:pos	NA	NA	527.386	9.57	NA	NA	NA	NA	NA	0	NA	NA	NA	other
9.57_528.3925	1.3825	0.068	0.251	DOR:NOR	C18:pos	NA	C26 H53 N6 O3 P	528.393	9.57	NA	NA	NA	NA	NA	0	NA	NA	NA	other
9.57_563.3216	0.0755	0.1122	0.3373	DOR:NOR	C18:pos	NA	C29 H45 N3 O8	563.322	9.57	NA	NA	NA	NA	NA	0	NA	NA	NA	other
9.573_303.2274	0.114	0.0191	0.1354	DOR:NOR	C18:pos	NA	C13 H29 N5 O3	303.227	9.573	NA	NA	NA	NA	NA	0	NA	NA	NA	down
9.573_619.3837	0.0151	0.1716	0.3913	DOR:NOR	C18:pos	NA	C35 H58 N O4 P S	619.384	9.573	NA	NA	NA	NA	NA	0	NA	NA	NA	other
9.573_675.4067	0.022	0.1661	0.3874	DOR:NOR	C18:pos	NA	C29 H62 N3 O12 P	675.407	9.573	NA	NA	NA	NA	NA	0	NA	NA	NA	other
9.575_319.2507	0.1164	0.0192	0.1357	DOR:NOR	C18:pos	NA	C14 H34 N5 O P	319.251	9.575	NA	NA	NA	NA	NA	0	NA	NA	NA	down
9.577_302.2217	0.0407	0.8698	0.8913	DOR:NOR	C18:pos	NA	C16 H26 N6	302.222	9.577	NA	NA	NA	NA	NA	0	NA	NA	NA	other
9.577_302.2242	0.1274	0.0216	0.1439	DOR:NOR	C18:pos	Eicosapentanoic acid	C20 H30 O2	302.224	9.577	C06428	S393682	HMDB0001999	4e-04	1.1842	13	Lipids and lipid-like molecules	Fatty Acyls	Fatty acids and conjugates	down
9.577_316.2609	0.5074	0.1599	0.3863	DOR:NOR	C18:pos	Glyceryl 2-pentadecanoate	C18 H36 O4	316.261	9.577	NA	S467962	HMDB0011532	4e-04	1.3578	8	Lipids and lipid-like molecules	Glycerolipids	Monoradylglycerols	other
9.577_324.206	0.1284	0.0309	0.1721	DOR:NOR	C18:pos	NA	C17 H28 N2 O4	324.206	9.577	NA	NA	NA	NA	NA	0	NA	NA	NA	down
9.577_325.2093	0.1079	0.0157	0.1201	DOR:NOR	C18:pos	NA	C14 H31 N O7	325.209	9.577	NA	NA	NA	NA	NA	0	NA	NA	NA	down
9.577_338.2428	0.5464	0.1982	0.396	DOR:NOR	C18:pos	NA	C15 H34 N2 O6	338.243	9.577	NA	NA	NA	NA	NA	0	NA	NA	NA	other
9.577_356.1432	0.0905	0.0185	0.1335	DOR:NOR	C18:pos	NA	C21 H24 O3 S	356.143	9.577	NA	NA	NA	NA	NA	0	NA	NA	NA	down
9.577_551.3227	0.0331	0.1784	0.3915	DOR:NOR	C18:pos	NA	C25 H51 N3 O6 P2	551.323	9.577	NA	NA	NA	NA	NA	0	NA	NA	NA	other
9.578_521.3485	0.0367	0.016	0.1213	DOR:NOR	C18:pos	4033747	C26 H52 N O7 P	521.348	9.578	NA	S17240641	HMDB0002815	-4e-04	-0.7293	3	Lipids and lipid-like molecules	Glycerophospholipids	Glycerophosphocholines	down
9.579_346.1879	0.1019	0.0258	0.1588	DOR:NOR	C18:pos	NA	C19 H26 N2 O4	346.188	9.579	NA	NA	NA	NA	NA	0	NA	NA	NA	down
9.58_284.2137	3.5493	0.3572	0.4558	DOR:NOR	C18:pos	(9cis)-retinal	C20 H28 O	284.214	9.58	C16681	M836	NA	4e-04	1.2404	6	Lipids and lipid-like molecules	Prenol lipids	Retinoids	other
9.58_486.345	1.6418	0.1023	0.3226	DOR:NOR	C18:pos	NA	C23 H47 N6 O3 P	486.345	9.58	NA	NA	NA	NA	NA	0	NA	NA	NA	other
9.58_651.4091	0.0185	0.1859	0.3922	DOR:NOR	C18:pos	NA	C36 H62 N O5 P S	651.409	9.58	NA	NA	NA	NA	NA	0	NA	NA	NA	other
9.581_621.399	0.0242	0.2106	0.4006	DOR:NOR	C18:pos	NA	C31 H60 N O9 P	621.399	9.581	NA	NA	NA	NA	NA	0	NA	NA	NA	other
9.583_577.3375	0.0581	0.1233	0.3494	DOR:NOR	C18:pos	NA	C29 H48 N5 O5 P	577.337	9.583	NA	NA	NA	NA	NA	0	NA	NA	NA	other
[truncated: 296 more rows]

## Sheet: identification-negative
Compound.ID	ratio	t.test_p.value	t.test_p.value_BHcorrect	sample	LCplatform	Name	Formula	Molecular.Weight	Actual.RT	KEGG.ID	ID	HMDB.ID	DeltaMass..Da.	DeltaMass..ppm.	ChemSpider.Results	Super.class	Class	Sub.class	label
0.587_321.0702	0.0054	0.0165	0.1591	DOR:NOR	C18:neg	N-[3-carboxy-2-(carboxymethyl)-2-hydroxypropanoyl]glutamic acid	C11 H15 N O10	321.07	0.587	NA	S19992713	HMDB0013220	-6e-04	-1.8457	1	Organic acids and derivatives	Carboxylic acids and derivatives	Amino acids, peptides, and analogues	down
0.595_304.0912	0.0277	0.0189	0.1591	DOR:NOR	C18:neg	N-acetyl-1-aspartylglutamic acid	C11 H16 N2 O8	304.091	0.595	C12270	M505	NA	-5e-04	-1.7975	1	null	null	null	down
0.599_580.0349	0.0353	0.0071	0.1206	DOR:NOR	C18:neg	Uridine 5'-diphosphoglucuronic acid	C15 H22 N2 O18 P2	580.035	0.599	C00167	M1411	NA	-6e-04	-1.0656	3	Nucleosides, nucleotides, and analogues	Pyrimidine nucleotides	Pyrimidine nucleotide sugars	down
0.605_339.9964	0.013	0.1312	0.33	DOR:NOR	C18:neg	Α-d-glucose-1,6-bisphosphate	C6 H14 O12 P2	339.996	0.605	C00660	M1711	NA	-4e-04	-1.1587	10	NA	NA	NA	other
0.668_226.0688	0.1904	0.0914	0.2628	DOR:NOR	C18:neg	(2xi)-d-gluco-heptonic acid	C7 H14 O8	226.069	0.668	NA	S55750	HMDB0240292	0	0.1368	1	Organic oxygen compounds	Organooxygen compounds	Carbohydrates and carbohydrate conjugates	other
0.668_561.8164	1.3031	0.1778	0.402	DOR:NOR	C18:neg	NA	C9 H6 Cl O18 P3 S	561.816	0.668	NA	NA	NA	NA	NA	0	NA	NA	NA	other
0.668_627.8068	1.3334	0.1854	0.4132	DOR:NOR	C18:neg	NA	NA	627.807	0.668	NA	NA	NA	NA	NA	0	NA	NA	NA	other
0.669_113.9918	1.2348	0.168	0.3888	DOR:NOR	C18:neg	NA	NA	113.992	0.669	NA	NA	NA	NA	NA	0	NA	NA	NA	other
0.669_174.1111	0.0315	0.0046	0.0902	DOR:NOR	C18:neg	Dl-arginine	C6 H14 N4 O2	174.111	0.669	C02385	M408	NA	5e-04	3.1035	2	null	null	null	down
0.669_249.968	1.2605	0.2505	0.4423	DOR:NOR	C18:neg	NA	C3 H3 N6 O4 P S	249.968	0.669	NA	NA	NA	NA	NA	0	NA	NA	NA	other
0.669_381.8802	1.1602	0.6184	0.6533	DOR:NOR	C18:neg	NA	C3 H6 Cl N6 O4 P3 S2	381.88	0.669	NA	NA	NA	NA	NA	0	NA	NA	NA	other
0.669_569.8479	1.6136	0.0561	0.2055	DOR:NOR	C18:neg	NA	C4 H13 Cl N2 O18 P2 S3	569.848	0.669	NA	NA	NA	NA	NA	0	NA	NA	NA	other
0.669_637.8353	1.1115	0.9823	0.9874	DOR:NOR	C18:neg	NA	NA	637.835	0.669	NA	NA	NA	NA	NA	0	NA	NA	NA	other
0.67_317.9556	1.5573	0.0446	0.1914	DOR:NOR	C18:neg	NA	C6 H8 O11 P2	317.956	0.67	NA	NA	NA	NA	NA	0	NA	NA	NA	up
0.67_385.9432	1.4229	0.1346	0.3352	DOR:NOR	C18:neg	NA	C3 H7 N4 O14 P S	385.943	0.67	NA	NA	NA	NA	NA	0	NA	NA	NA	other
0.67_443.9017	1.3892	0.072	0.2268	DOR:NOR	C18:neg	NA	C7 H11 Cl N2 O10 P2 S2	443.902	0.67	NA	NA	NA	NA	NA	0	NA	NA	NA	other
0.67_671.298	10.934	0.3088	0.4847	DOR:NOR	C18:neg	NA	C22 H50 N5 O16 P	671.298	0.67	NA	NA	NA	NA	NA	0	NA	NA	NA	other
0.671_511.889	1.5775	0.0688	0.2247	DOR:NOR	C18:neg	NA	C5 H11 Cl N4 O14 P2 S2	511.889	0.671	NA	NA	NA	NA	NA	0	NA	NA	NA	other
0.671_579.8767	1.1782	0.431	0.49	DOR:NOR	C18:neg	NA	C9 H12 Cl N2 O17 P3 S	579.877	0.671	NA	NA	NA	NA	NA	0	NA	NA	NA	other
0.671_671.2311	13.4792	0.2982	0.4847	DOR:NOR	C18:neg	NA	C28 H50 Cl N3 O5 S4	671.231	0.671	NA	NA	NA	NA	NA	0	NA	NA	NA	other
0.674_158.0185	0.8719	0.678	0.7085	DOR:NOR	C18:neg	NA	NA	158.018	0.674	NA	NA	NA	NA	NA	0	NA	NA	NA	other
0.674_675.2012	16.2123	0.3078	0.4847	DOR:NOR	C18:neg	NA	C24 H50 Cl N O10 S4	675.201	0.674	NA	NA	NA	NA	NA	0	NA	NA	NA	other
0.675_125.998	0.536	0.9465	0.9581	DOR:NOR	C18:neg	NA	C4 H3 N2 O P	125.998	0.675	NA	NA	NA	NA	NA	2	NA	NA	NA	other
0.675_319.1271	8.1274	0.2656	0.4552	DOR:NOR	C18:neg	NA	C14 H25 N O3 S2	319.127	0.675	NA	NA	NA	NA	NA	0	NA	NA	NA	other
0.675_453.9307	0.9477	0.6386	0.6721	DOR:NOR	C18:neg	NA	C6 H9 N4 O14 P3	453.931	0.675	NA	NA	NA	NA	NA	0	NA	NA	NA	other
0.676_147.9896	1.131	0.9964	0.9964	DOR:NOR	C18:neg	NA	C H Cl N6 O	147.99	0.676	NA	NA	NA	NA	NA	0	NA	NA	NA	other
0.676_187.0452	0.1839	0.1031	0.2859	DOR:NOR	C18:neg	NA	C11 H9 N S	187.045	0.676	NA	NA	NA	NA	NA	0	NA	NA	NA	other
0.679_202.0451	0.2996	0.4651	0.5157	DOR:NOR	C18:neg	NA	C4 H6 N6 O4	202.045	0.679	NA	NA	NA	NA	NA	0	NA	NA	NA	other
0.68_119.0573	0.0505	0.0184	0.1591	DOR:NOR	C18:neg	NA	NA	119.057	0.68	NA	NA	NA	NA	NA	0	NA	NA	NA	down
0.68_175.0088	0.7339	0.4954	0.5406	DOR:NOR	C18:neg	NA	C3 H6 N5 P S	175.009	0.68	NA	NA	NA	NA	NA	0	NA	NA	NA	other
0.682_231.0719	0.0192	0.0237	0.1611	DOR:NOR	C18:neg	NA	C7 H14 N5 P S	231.072	0.682	NA	NA	NA	NA	NA	0	NA	NA	NA	down
0.685_635.2538	18.294	0.3237	0.4847	DOR:NOR	C18:neg	NA	C23 H49 Cl N5 O7 P3	635.254	0.685	NA	NA	NA	NA	NA	0	NA	NA	NA	other
0.686_685.2287	17.0856	0.2753	0.461	DOR:NOR	C18:neg	NA	C25 H51 Cl N O12 P3	685.229	0.686	NA	NA	NA	NA	NA	0	NA	NA	NA	other
0.687_97.9757	0.8404	0.5106	0.5514	DOR:NOR	C18:neg	NA	NA	97.9757	0.687	NA	NA	NA	NA	NA	0	NA	NA	NA	other
0.688_120.0413	0.635	0.2652	0.4552	DOR:NOR	C18:neg	NA	NA	120.041	0.688	NA	NA	NA	NA	NA	0	NA	NA	NA	other
0.688_182.0786	1.7288	0.223	0.4188	DOR:NOR	C18:neg	D-(-)-mannitol	C6 H14 O6	182.079	0.688	D00062	M1527	NA	4e-04	2.2996	4	NA	NA	NA	other
0.69_216.0399	2.1715	0.9665	0.9749	DOR:NOR	C18:neg	NA	C6 H13 Cl O6	216.04	0.69	NA	NA	NA	NA	NA	0	NA	NA	NA	other
0.691_270.0954	0.8001	0.4905	0.5377	DOR:NOR	C18:neg	His-asp	C10 H14 N4 O5	270.095	0.691	NA	S8035922	HMDB0028881	0.001	3.6787	2	Organic acids and derivatives	Carboxylic acids and derivatives	Amino acids, peptides, and analogues	other
0.693_180.0632	1.4025	0.7596	0.7825	DOR:NOR	C18:neg	D-tagatose	C6 H12 O6	180.063	0.693	C00795	BGI252	NA	2e-04	1.3448	30	null	null	null	other
0.695_223.0568	0.1502	0.0379	0.1825	DOR:NOR	C18:neg	NA	C6 H16 N3 P3	223.057	0.695	NA	NA	NA	NA	NA	0	NA	NA	NA	down
0.697_114.0307	1.5541	0.0574	0.2057	DOR:NOR	C18:neg	NA	NA	114.031	0.697	NA	NA	NA	NA	NA	0	NA	NA	NA	other
0.697_155.0688	0.0984	0.0177	0.1591	DOR:NOR	C18:neg	L-histidine	C6 H9 N3 O2	155.069	0.697	C00135	M473	NA	7e-04	4.5417	2	Organic acids and derivatives	Carboxylic acids and derivatives	Amino acids, peptides, and analogues	down
0.699_248.0704	0.0329	0.0078	0.1245	DOR:NOR	C18:neg	NA	C12 H13 N2 O2 P	248.07	0.699	NA	NA	NA	NA	NA	0	NA	NA	NA	down
0.702_324.0362	0.0332	0.003	0.0902	DOR:NOR	C18:neg	Uridine monophosphate (ump)	C9 H13 N2 O9 P	324.036	0.702	C00105	M1405	NA	-4e-04	-1.096	4	Nucleosides, nucleotides, and analogues	Pyrimidine nucleotides	Pyrimidine ribonucleotides	down
0.704_129.0418	1.8827	0.5187	0.5591	DOR:NOR	C18:neg	NA	NA	129.042	0.704	NA	NA	NA	NA	NA	0	NA	NA	NA	other
0.704_695.2595	19.2038	0.2435	0.4366	DOR:NOR	C18:neg	NA	C27 H48 N5 O10 P3	695.26	0.704	NA	NA	NA	NA	NA	0	NA	NA	NA	other
0.705_150.0524	0.0491	0.0051	0.0961	DOR:NOR	C18:neg	D-(+)-xylose	C5 H10 O5	150.052	0.705	NA	S559198	HMDB0060254	5e-04	3.0477	18	Organic oxygen compounds	Organooxygen compounds	Carbohydrates and carbohydrate conjugates	down
0.705_388.1222	0.9084	0.75	0.774	DOR:NOR	C18:neg	NA	C14 H20 N4 O9	388.122	0.705	NA	NA	NA	NA	NA	0	NA	NA	NA	other
0.707_221.0901	0.016	0.0012	0.0902	DOR:NOR	C18:neg	N-acetyl-d-mannosamine	C8 H15 N O6	221.09	0.707	C00645	BGI414	NA	-2e-04	-0.7249	9	null	null	null	down
0.708_72.02	0.0492	0.0961	0.2737	DOR:NOR	C18:neg	NA	NA	72.02	0.708	NA	NA	NA	NA	NA	0	NA	NA	NA	other
0.71_89.0467	0.0753	0.0021	0.0902	DOR:NOR	C18:neg	NA	NA	89.0467	0.71	NA	NA	NA	NA	NA	0	NA	NA	NA	down
0.713_257.0669	0.0206	0.0004	0.0621	DOR:NOR	C18:neg	NA	C9 H12 Cl N5 O2	257.067	0.713	NA	NA	NA	NA	NA	0	NA	NA	NA	down
0.717_640.2496	41.6607	0.3341	0.4847	DOR:NOR	C18:neg	NA	C24 H47 N6 O6 P3 S	640.25	0.717	NA	NA	NA	NA	NA	0	NA	NA	NA	other
0.718_645.2827	29.0401	0.2953	0.4847	DOR:NOR	C18:neg	NA	C27 H43 N5 O13	645.283	0.718	NA	NA	NA	NA	NA	0	NA	NA	NA	other
0.719_342.1167	0.7069	0.985	0.9884	DOR:NOR	C18:neg	Sucrose	C12 H22 O11	342.117	0.719	C00089	S5768	HMDB0000258	-5e-04	-1.546	22	Organic oxygen compounds	Organooxygen compounds	Carbohydrates and carbohydrate conjugates	other
0.722_139.947	23.868	0.0935	0.2677	DOR:NOR	C18:neg	NA	NA	139.947	0.722	NA	NA	NA	NA	NA	0	NA	NA	NA	other
0.724_307.0842	0.0087	0.1218	0.3187	DOR:NOR	C18:neg	L-glutathione (reduced)	C10 H17 N3 O6 S	307.084	0.724	C00051	M472	NA	-4e-04	-1.3204	2	null	null	null	other
0.724_363.0585	0.1382	0.1254	0.3209	DOR:NOR	C18:neg	Guanosine monophosphate	C10 H14 N5 O8 P	363.058	0.724	C00144	S6545	HMDB0001397	-5e-04	-1.4671	4	Nucleosides, nucleotides, and analogues	Purine nucleotides	Purine ribonucleotides	other
0.724_401.0996	2.1161	0.6566	0.6886	DOR:NOR	C18:neg	NA	C16 H26 N3 O P3 S	401.1	0.724	NA	NA	NA	NA	NA	0	NA	NA	NA	other
0.725_202.1429	0.0142	0.0079	0.1245	DOR:NOR	C18:neg	N,n-dimethylarginine	C8 H18 N4 O2	202.143	0.725	NA	S110375	HMDB0001539	1e-04	0.4626	2	Organic acids and derivatives	Carboxylic acids and derivatives	Amino acids, peptides, and analogues	down
0.726_179.8873	2.0235	0.5594	0.5975	DOR:NOR	C18:neg	NA	NA	179.887	0.726	NA	NA	NA	NA	NA	0	NA	NA	NA	other
0.726_184.0135	0.0077	0.0368	0.1825	DOR:NOR	C18:neg	NA	C5 H9 Cl O5	184.013	0.726	NA	NA	NA	NA	NA	0	NA	NA	NA	down
0.726_209.072	2.1831	0.5835	0.6221	DOR:NOR	C18:neg	NA	C7 H15 N O4 S	209.072	0.726	NA	NA	NA	NA	NA	0	NA	NA	NA	other
0.73_347.0635	0.0524	0.0544	0.2055	DOR:NOR	C18:neg	Adenosine 5'-monophosphate	C10 H14 N5 O7 P	347.063	0.73	C00020	M252	NA	-5e-04	-1.3061	6	Nucleosides, nucleotides, and analogues	Purine nucleotides	Purine ribonucleotides	other
0.736_144.0052	0.0211	0.0751	0.2309	DOR:NOR	C18:neg	NA	C5 H4 O5	144.005	0.736	NA	NA	NA	NA	NA	0	NA	NA	NA	other
0.737_228.0037	0.0049	0.0781	0.2351	DOR:NOR	C18:neg	Thiolutin	C8 H8 N2 O2 S2	228.004	0.737	NA	S6608	HMDB0034228	-0.001	-4.4093	1	Organic nitrogen compounds	Organonitrogen compounds	N-arylamides	other
0.737_352.0767	170.985	0.3763	0.4847	DOR:NOR	C18:neg	(12-methyl-7-tetraphenyl)methyl hydrogen sulfate	C20 H16 O4 S	352.077	0.737	C19562	S49327	HMDB0060420	2e-04	0.5691	1	Benzenoids	Phenanthrenes and derivatives	null	other
0.744_117.0781	0.1798	0.0331	0.1821	DOR:NOR	C18:neg	NA	NA	117.078	0.744	NA	NA	NA	NA	NA	0	NA	NA	NA	down
0.744_627.2719	47.099	0.3379	0.4847	DOR:NOR	C18:neg	NA	C20 H46 N5 O15 P	627.272	0.744	NA	NA	NA	NA	NA	0	NA	NA	NA	other
0.746_280.0466	0.0053	0.0014	0.0902	DOR:NOR	C18:neg	NA	C10 H9 Cl N6 O2	280.047	0.746	NA	NA	NA	NA	NA	0	NA	NA	NA	down
0.75_112.0264	0.3011	0.0089	0.1276	DOR:NOR	C18:neg	NA	NA	112.026	0.75	NA	NA	NA	NA	NA	0	NA	NA	NA	down
0.753_268.0811	0.0165	0.0026	0.0902	DOR:NOR	C18:neg	Inosine	C10 H12 N4 O5	268.081	0.753	C00294	BGI328	NA	-3e-04	-1.2283	4	Nucleosides, nucleotides, and analogues	Purine nucleosides	null	down
0.753_348.0996	107.674	0.4243	0.4862	DOR:NOR	C18:neg	NA	C14 H16 N6 O3 S	348.1	0.753	NA	NA	NA	NA	NA	0	NA	NA	NA	other
0.754_194.9576	7.1114	0.1586	0.3716	DOR:NOR	C18:neg	NA	C4 H6 N O2 P S2	194.958	0.754	NA	NA	NA	NA	NA	0	NA	NA	NA	other
0.756_136.0378	0.4628	0.1732	0.3959	DOR:NOR	C18:neg	Threonic acid	C4 H8 O5	136.038	0.756	NA	S133224	HMDB0000943	-6e-04	-4.5849	6	Organic oxygen compounds	Organooxygen compounds	Carbohydrates and carbohydrate conjugates	other
0.756_181.0735	0.0911	0.0412	0.1874	DOR:NOR	C18:neg	L-tyrosine	C9 H11 N O3	181.073	0.756	C00082	M2255	NA	4e-04	2.3151	8	Organic acids and derivatives	Carboxylic acids and derivatives	Amino acids, peptides, and analogues	down
0.756_325.0933	141.157	0.418	0.4847	DOR:NOR	C18:neg	NA	C13 H16 Cl N5 O3	325.093	0.756	NA	NA	NA	NA	NA	0	NA	NA	NA	other
0.759_152.0326	0.0273	0.0042	0.0902	DOR:NOR	C18:neg	NA	C4 H8 O6	152.033	0.759	NA	NA	NA	NA	NA	0	NA	NA	NA	down
0.759_403.1096	12.3313	0.4677	0.5166	DOR:NOR	C18:neg	NA	C16 H21 N O11	403.11	0.759	NA	NA	NA	NA	NA	0	NA	NA	NA	other
0.947_209.0719	2.8436	0.4555	0.5089	DOR:NOR	C18:neg	NA	C7 H15 N O4 S	209.072	0.947	NA	NA	NA	NA	NA	0	NA	NA	NA	other
1.209_152.0326	0.0539	0.0298	0.1804	DOR:NOR	C18:neg	NA	C4 H8 O6	152.033	1.209	NA	NA	NA	NA	NA	0	NA	NA	NA	down
1.248_134.1126	1.1142	0.8201	0.8345	DOR:NOR	C18:neg	NA	NA	134.113	1.248	NA	NA	NA	NA	NA	0	NA	NA	NA	other
1.27_131.094	0.3557	0.0322	0.1821	DOR:NOR	C18:neg	NA	C6 H13 N O2	131.094	1.27	NA	NA	NA	NA	NA	13	NA	NA	NA	down
1.37_134.1127	1.345	0.2515	0.4427	DOR:NOR	C18:neg	NA	NA	134.113	1.37	NA	NA	NA	NA	NA	0	NA	NA	NA	other
1.397_307.0658	0.025	0.0004	0.0621	DOR:NOR	C18:neg	NA	C9 H13 N3 O9	307.066	1.397	NA	NA	NA	NA	NA	0	NA	NA	NA	down
10_304.2407	0.0314	0.0368	0.1825	DOR:NOR	C18:neg	Arachidonic acid	C20 H32 O2	304.241	10	C00219	M2742	NA	-5e-04	-1.6706	11	Lipids and lipid-like molecules	Fatty Acyls	Fatty acids and conjugates	down
10_440.2156	0.0454	0.0556	0.2055	DOR:NOR	C18:neg	NA	C22 H28 N6 O4	440.216	10	NA	NA	NA	NA	NA	0	NA	NA	NA	other
10_574.3983	1.0036	0.9875	0.9892	DOR:NOR	C18:neg	NA	C27 H55 N6 O5 P	574.398	10	NA	NA	NA	NA	NA	0	NA	NA	NA	other
10.001_372.2282	0.0438	0.0463	0.1923	DOR:NOR	C18:neg	2,3,4-trihydroxy-6-methyl-5-[(2e,6e)-3,7,11-trimethyl-2,6,10-dodecatrien-1-yl]benzaldehyde	C23 H32 O4	372.228	10.001	NA	S4476250	HMDB0030012	0.0019	4.9911	3	Lipids and lipid-like molecules	Prenol lipids	Sesquiterpenoids	down
10.001_404.166	0.0542	0.0498	0.1993	DOR:NOR	C18:neg	NA	C23 H24 N4 O S	404.166	10.001	NA	NA	NA	NA	NA	0	NA	NA	NA	down
10.001_636.516	0.05	0.0675	0.2228	DOR:NOR	C18:neg	NA	C33 H73 N4 O3 P S	636.516	10.001	NA	NA	NA	NA	NA	0	NA	NA	NA	other
10.007_486.3457	0.9774	0.8137	0.8294	DOR:NOR	C18:neg	NA	C23 H47 N6 O3 P	486.346	10.007	NA	NA	NA	NA	NA	0	NA	NA	NA	other
10.013_479.3017	0.0344	0.0285	0.1764	DOR:NOR	C18:neg	1-oleoyl-sn-glycero-3-phosphoethanolamine	C23 H46 N O7 P	479.302	10.013	NA	S7826021	HMDB0011506	-5e-04	-1.1084	4	Lipids and lipid-like molecules	Glycerophospholipids	Glycerophosphoethanolamines	down
10.034_450.2986	0.0279	0.0391	0.1831	DOR:NOR	C18:neg	NA	C26 H42 O6	450.299	10.034	NA	NA	NA	NA	NA	0	NA	NA	NA	down
10.035_440.2698	0.0184	0.0164	0.1591	DOR:NOR	C18:neg	NA	C19 H42 Cl N4 O3 P	440.27	10.035	NA	NA	NA	NA	NA	0	NA	NA	NA	down
10.036_378.2807	0.9064	0.299	0.4847	DOR:NOR	C18:neg	NA	C21 H38 N4 S	378.281	10.036	NA	NA	NA	NA	NA	0	NA	NA	NA	other
10.037_348.2283	0.0809	0.0184	0.1591	DOR:NOR	C18:neg	NA	C17 H28 N6 O2	348.228	10.037	NA	NA	NA	NA	NA	0	NA	NA	NA	down
10.037_380.1662	0.0859	0.0154	0.1591	DOR:NOR	C18:neg	Ecabet	C20 H28 O5 S	380.166	10.037	NA	S59201	HMDB0015613	-4e-04	-1.0904	1	Lipids and lipid-like molecules	Prenol lipids	Diterpenoids	down
10.038_113.9918	0.8147	0.1291	0.3272	DOR:NOR	C18:neg	NA	NA	113.992	10.038	NA	NA	NA	NA	NA	0	NA	NA	NA	other
10.038_280.2407	0.0324	0.0047	0.0902	DOR:NOR	C18:neg	Linoleic acid	C18 H32 O2	280.241	10.038	C01595	M2706	NA	-4e-04	-1.5648	12	Lipids and lipid-like molecules	Fatty Acyls	Lineolic acids and derivatives	down
10.039_416.2156	0.0512	0.0042	0.0902	DOR:NOR	C18:neg	NA	C20 H28 N6 O4	416.216	10.039	NA	NA	NA	NA	NA	0	NA	NA	NA	down
10.039_484.2028	0.0794	0.0175	0.1591	DOR:NOR	C18:neg	NA	C21 H34 N4 O5 P2	484.203	10.039	NA	NA	NA	NA	NA	0	NA	NA	NA	down
10.041_730.3919	0.0212	0.1511	0.3575	DOR:NOR	C18:neg	NA	C33 H60 N6 O8 P2	730.392	10.041	NA	NA	NA	NA	NA	0	NA	NA	NA	other
10.057_600.3286	0.0169	0.0422	0.1874	DOR:NOR	C18:neg	1-stearoyl-sn-glycero-3-phospho-1d-myo-inositol	C27 H53 O12 P	600.329	10.057	NA	S34448669	HMDB0061696	-0.0011	-1.8824	3	Lipids and lipid-like molecules	Glycerophospholipids	Glycerophosphoinositols	down
10.118_398.2437	0.0564	0.072	0.2268	DOR:NOR	C18:neg	NA	C25 H34 O4	398.244	10.118	NA	NA	NA	NA	NA	0	NA	NA	NA	other
10.118_466.2311	0.0453	0.0383	0.1825	DOR:NOR	C18:neg	Dolichyl b-d-glucosyl phosphate	C21 H39 O9 P	466.231	10.118	NA	S17216044	HMDB0001054	0.0021	4.487	1	Lipids and lipid-like molecules	Prenol lipids	Sesquiterpenoids	down
10.119_330.2565	0.0599	0.074	0.2296	DOR:NOR	C18:neg	Ethyl eicosapentaenoic acid	C22 H34 O2	330.257	10.119	NA	S8007147	HMDB0039530	-6e-04	-1.9093	8	Lipids and lipid-like molecules	Fatty Acyls	Fatty acid esters	other
10.143_366.2544	0.2137	0.0036	0.0902	DOR:NOR	C18:neg	NA	C18 H39 O5 P	366.254	10.143	NA	NA	NA	NA	NA	0	NA	NA	NA	down
10.159_371.3043	0.0212	0.0031	0.0902	DOR:NOR	C18:neg	4149853	C21 H41 N O4	371.304	10.159	NA	S30776567	HMDB0005066	-7e-04	-1.9911	1	Lipids and lipid-like molecules	Fatty Acyls	Fatty acid esters	down
10.174_343.2549	0.0299	0.0417	0.1874	DOR:NOR	C18:neg	NA	C19 H37 N O2 S	343.255	10.174	NA	NA	NA	NA	NA	0	NA	NA	NA	down
10.178_330.2567	0.0471	0.0501	0.1993	DOR:NOR	C18:neg	Ethyl eicosapentaenoic acid	C22 H34 O2	330.257	10.178	NA	S8007147	HMDB0039530	-8e-04	-2.3541	8	Lipids and lipid-like molecules	Fatty Acyls	Fatty acid esters	other
10.202_374.2438	0.0322	0.0431	0.1898	DOR:NOR	C18:neg	NA	C19 H30 N6 O2	374.244	10.202	NA	NA	NA	NA	NA	0	NA	NA	NA	down
10.203_406.1815	0.0324	0.0349	0.1825	DOR:NOR	C18:neg	NA	C22 H30 O5 S	406.182	10.203	NA	NA	NA	NA	NA	0	NA	NA	NA	down
10.204_306.2564	0.0213	0.0189	0.1591	DOR:NOR	C18:neg	8z,11z,14z-eicosatrienoic acid	C20 H34 O2	306.256	10.204	C03242	M349	NA	-6e-04	-1.8636	5	Lipids and lipid-like molecules	Fatty Acyls	Fatty acids and conjugates	down
10.226_805.5849	410.411	0.2138	0.4188	DOR:NOR	C18:neg	O-{[(2r)-3-(docosanoyloxy)-2-(pentadecanoyloxy)propoxy](hydroxy)phosphoryl}-l-serine	C43 H84 N O10 P	805.585	10.226	NA	S74876152	HMDB0112709	-0.0016	-1.9426	2	Lipids and lipid-like molecules	Glycerophospholipids	Glycerophosphoserines	other
10.236_350.2497	0.0905	0.0415	0.1874	DOR:NOR	C18:neg	NA	C19 H34 N4 S	350.25	10.236	NA	NA	NA	NA	NA	0	NA	NA	NA	down
10.239_402.2987	0.0071	0.0031	0.0902	DOR:NOR	C18:neg	3,6-anhydro-1-o-palmitoylhexitol	C22 H42 O6	402.299	10.239	NA	S3336019	HMDB0029887	-6e-04	-1.5371	1	Lipids and lipid-like molecules	Fatty Acyls	Fatty acid esters	down
10.24_392.2703	0.013	0.0003	0.0621	DOR:NOR	C18:neg	(2e,4e,6e,8e,10e,12e,14e)-15-(4-hydroxy-2,6,6-trimethyl-1-cyclohexen-1-yl)-4,9,13-trimethyl-2,4,6,8,10,12,14-pentadecaheptaenal	C27 H36 O2	392.27	10.24	NA	S35014718	HMDB0039019	0.0012	3.03	1	Lipids and lipid-like molecules	Prenol lipids	Sesterterpenoids	down
10.244_317.9556	0.8139	0.4192	0.4847	DOR:NOR	C18:neg	NA	C7 H4 N4 O7 P2	317.956	10.244	NA	NA	NA	NA	NA	0	NA	NA	NA	other
10.245_249.9679	0.8844	0.4047	0.4847	DOR:NOR	C18:neg	NA	C3 H5 N6 O2 P3	249.968	10.245	NA	NA	NA	NA	NA	0	NA	NA	NA	other
10.245_256.2406	0.5102	0.0479	0.1961	DOR:NOR	C18:neg	Ethyl myristate	C16 H32 O2	256.241	10.245	NA	M2599	NA	-3e-04	-1.2719	9	NA	NA	NA	down
10.245_324.2283	1.103	0.9501	0.9601	DOR:NOR	C18:neg	NA	C15 H28 N6 O2	324.228	10.245	NA	NA	NA	NA	NA	0	NA	NA	NA	other
10.245_385.9432	0.7092	0.2721	0.461	DOR:NOR	C18:neg	NA	C5 H4 N6 O11 P2	385.943	10.245	NA	NA	NA	NA	NA	0	NA	NA	NA	other
10.245_453.9306	0.6135	0.2199	0.4188	DOR:NOR	C18:neg	NA	C6 H9 N4 O14 P3	453.931	10.245	NA	NA	NA	NA	NA	0	NA	NA	NA	other
10.268_452.3144	0.0329	0.0235	0.1611	DOR:NOR	C18:neg	NA	C27 H40 N4 O2	452.314	10.268	NA	NA	NA	NA	NA	0	NA	NA	NA	down
10.299_356.2723	0.0514	0.0497	0.1993	DOR:NOR	C18:neg	Nisinic acid	C24 H36 O2	356.272	10.299	NA	S9967286	HMDB0002007	-7e-04	-2.0932	3	Lipids and lipid-like molecules	Fatty Acyls	Fatty acids and conjugates	down
10.349_385.9432	0.5497	0.2181	0.4188	DOR:NOR	C18:neg	NA	C5 H4 N6 O11 P2	385.943	10.349	NA	NA	NA	NA	NA	0	NA	NA	NA	other
10.35_350.2439	0.0553	0.0085	0.1265	DOR:NOR	C18:neg	NA	C17 H30 N6 O2	350.244	10.35	NA	NA	NA	NA	NA	0	NA	NA	NA	down
10.351_382.1818	0.0729	0.0039	0.0902	DOR:NOR	C18:neg	NA	C20 H32 O3 P2	382.182	10.351	NA	NA	NA	NA	NA	0	NA	NA	NA	down
10.351_418.2314	0.0409	0.0046	0.0902	DOR:NOR	C18:neg	NA	C19 H34 N2 O8	418.231	10.351	NA	NA	NA	NA	NA	0	NA	NA	NA	down
10.352_113.9918	0.6799	0.0109	0.1406	DOR:NOR	C18:neg	NA	NA	113.992	10.352	NA	NA	NA	NA	NA	0	NA	NA	NA	down
10.352_282.2563	0.0209	0.0004	0.0621	DOR:NOR	C18:neg	Oleic acid	C18 H34 O2	282.256	10.352	C00712	M10	NA	-5e-04	-1.6466	9	Lipids and lipid-like molecules	Fatty Acyls	Fatty acids and conjugates	down
10.352_317.9557	0.7182	0.0422	0.1874	DOR:NOR	C18:neg	NA	C5 H9 N2 O8 P3	317.956	10.352	NA	NA	NA	NA	NA	0	NA	NA	NA	down
10.352_611.3809	0.0258	0.2575	0.4483	DOR:NOR	C18:neg	NA	C37 H49 N5 O3	611.381	10.352	NA	NA	NA	NA	NA	0	NA	NA	NA	other
10.354_249.9679	0.629	0.1235	0.3192	DOR:NOR	C18:neg	NA	C3 H5 N6 O2 P3	249.968	10.354	NA	NA	NA	NA	NA	0	NA	NA	NA	other
10.368_481.3175	0.0157	0.0225	0.1611	DOR:NOR	C18:neg	1-stearoyl-sn-glycero-3-phosphoethanolamine	C23 H48 N O7 P	481.317	10.368	C21484	S7826018	HMDB0011130	-6e-04	-1.3386	3	Lipids and lipid-like molecules	Glycerophospholipids	Glycerophosphoethanolamines	down
10.374_886.5586	0.0069	0.1885	0.4132	DOR:NOR	C18:neg	(2r)-1-[(hydroxy{[(1s,3r)-2,3,4,5,6-pentahydroxycyclohexyl]oxy}phosphoryl)oxy]-3-(stearoyloxy)-2-propanyl (5z,8z,11z,14z)-5,8,11,14-icosatetraenoate	C47 H83 O13 P	886.559	10.374	NA	S24767700	HMDB0009815	-0.0015	-1.6995	9	Lipids and lipid-like molecules	Glycerophospholipids	Glycerophosphoinositols	other
10.381_468.2467	0.0242	0.0238	0.1611	DOR:NOR	C18:neg	NA	C24 H32 N6 O4	468.247	10.381	NA	NA	NA	NA	NA	0	NA	NA	NA	down
10.382_332.2722	0.0226	0.0212	0.1611	DOR:NOR	C18:neg	Docosatetraenoic acid	C22 H36 O2	332.272	10.382	C16527	S4593749	HMDB0002226	-7e-04	-1.9849	6	Lipids and lipid-like molecules	Fatty Acyls	Fatty acids and conjugates	down
10.382_400.2595	0.0229	0.028	0.1749	DOR:NOR	C18:neg	5-hydroxy-2-isobutyryl-4,6,6-tris(3-methyl-2-buten-1-yl)-4-cyclohexene-1,3-dione	C25 H36 O4	400.26	10.382	NA	S35013126	HMDB0030065	0.0018	4.557	2	Organooxygen compounds	Carbonyl compounds	Ketones	down
10.507_308.2721	0.0156	0.0135	0.1591	DOR:NOR	C18:neg	1-(3-hydroxy-3-methyl-4-penten-1-yl)-2,5,5,8a-tetramethyldecahydro-2-naphthalenol	C20 H36 O2	308.272	10.507	NA	S454751	HMDB0036827	-6e-04	-1.9622	4	Lipids and lipid-like molecules	Prenol lipids	Diterpenoids	down
10.598_358.2879	0.0374	0.02	0.1611	DOR:NOR	C18:neg	1-phenyl-1,3-octadecanedione	C24 H38 O2	358.288	10.598	NA	S78501	HMDB0035583	-7e-04	-1.9302	3	Organic oxygen compounds	Organooxygen compounds	Carbonyl compounds	down
10.664_444.2555	1.3534	0.7793	0.8	DOR:NOR	C18:neg	NA	C24 H44 O S3	444.255	10.664	NA	NA	NA	NA	NA	0	NA	NA	NA	other
10.686_371.2864	0.0252	0.0362	0.1825	DOR:NOR	C18:neg	NA	C21 H41 N O2 S	371.286	10.686	NA	NA	NA	NA	NA	0	NA	NA	NA	down
10.698_334.2879	0.0186	0.006	0.1063	DOR:NOR	C18:neg	(13z,16z,19z)-docosatrienoic acid	C22 H38 O2	334.288	10.698	NA	S4471982	HMDB0002823	-7e-04	-2.2324	2	Lipids and lipid-like molecules	Fatty Acyls	Fatty acids and conjugates	down
10.83_803.5692	0.0082	0.2313	0.4274	DOR:NOR	C18:neg	O-{[(2r)-2-[(13z)-13-docosenoyloxy]-3-(pentadecanoyloxy)propoxy](hydroxy)phosphoryl}-l-serine	C43 H82 N O10 P	803.569	10.83	NA	S74875780	HMDB0112335	-0.0016	-1.9372	2	Lipids and lipid-like molecules	Glycerophospholipids	Glycerophosphoserines	other
10.834_384.1974	0.757	0.4019	0.4847	DOR:NOR	C18:neg	Bortezomib	C19 H25 B N4 O4	384.197	10.834	NA	S343402	HMDB0014334	-5e-04	-1.388	1	Organic acids and derivatives	Carboxylic acids and derivatives	Amino acids, peptides, and analogues	other
10.836_284.272	0.5949	0.1237	0.3192	DOR:NOR	C18:neg	Stearic acid	C18 H36 O2	284.272	10.836	C01530	S5091	HMDB0000827	-5e-04	-1.8468	4	Lipids and lipid-like molecules	Fatty Acyls	Fatty acids and conjugates	other
10.836_352.2596	0.4701	0.0997	0.2798	DOR:NOR	C18:neg	Glyceryl 2-linolenate	C21 H36 O4	352.26	10.836	NA	S9849475	HMDB0011540	0.0017	4.8931	4	Lipids and lipid-like molecules	Fatty Acyls	Lineolic acids and derivatives	other
10.92_360.3036	0.0429	0.028	0.1749	DOR:NOR	C18:neg	(9z,12z,15z,18z)-tetracosatetraenoic acid	C24 H40 O2	360.304	10.92	NA	S30776538	HMDB0006246	-8e-04	-2.1546	3	Lipids and lipid-like molecules	Fatty Acyls	Fatty acids and conjugates	down
10.949_310.2879	0.0156	0.0019	0.0902	DOR:NOR	C18:neg	Mfcd00065147	C20 H38 O2	310.288	10.949	NA	S4516584	HMDB0034451	-7e-04	-2.2496	11	Lipids and lipid-like molecules	Fatty Acyls	Fatty acid esters	down
11.376_565.3526	0.5929	0.3001	0.4847	DOR:NOR	C18:neg	NA	C33 H47 N3 O5	565.353	11.376	NA	NA	NA	NA	NA	0	NA	NA	NA	other
2.256_177.0454	646.648	0.5092	0.551	DOR:NOR	C18:neg	Alliin	C6 H11 N O3 S	177.045	2.256	NA	S108767	HMDB0033592	6e-04	3.455	4	Organic acids and derivatives	Carboxylic acids and derivatives	Amino acids, peptides, and analogues	other
2.256_99.0674	869.101	0.396	0.4847	DOR:NOR	C18:neg	NA	NA	99.0674	2.256	NA	NA	NA	NA	NA	0	NA	NA	NA	other
2.51_380.1047	192.406	0.4392	0.4975	DOR:NOR	C18:neg	Meticillin	C17 H20 N2 O6 S	380.105	2.51	NA	S5862	HMDB0015541	-4e-04	-1.1582	1	Organic acids and derivatives	Carboxylic acids and derivatives	Amino acids, peptides, and analogues	other
2.587_174.1085	1.2595	0.7115	0.7409	DOR:NOR	C18:neg	S-propyl hexanethioate	C9 H18 O S	174.108	2.587	NA	S469089	HMDB0039466	-6e-04	-3.6497	1	Lipids and lipid-like molecules	Fatty Acyls	Fatty acyl thioesters	other
2.599_165.0784	0.1705	0.0809	0.2374	DOR:NOR	C18:neg	L-phenylalanine	C9 H11 N O2	165.078	2.599	C02057	BGI374	NA	5e-04	3.2377	11	null	null	null	other
2.622_397.0946	405.71	0.402	0.4847	DOR:NOR	C18:neg	NA	C14 H24 N O8 P S	397.095	2.622	NA	NA	NA	NA	NA	0	NA	NA	NA	other
2.648_324.0819	278.14	0.4076	0.4847	DOR:NOR	C18:neg	NA	C11 H20 N2 O5 S2	324.082	2.648	NA	NA	NA	NA	NA	0	NA	NA	NA	other
2.654_334.0994	405.712	0.402	0.4847	DOR:NOR	C18:neg	Benzylpenicillin	C16 H18 N2 O4 S	334.099	2.654	C05551	S5693	HMDB0015186	-6e-04	-1.8682	1	Organic acids and derivatives	Carboxylic acids and derivatives	Amino acids, peptides, and analogues	other
2.665_352.0768	230.122	0.4221	0.4847	DOR:NOR	C18:neg	(12-methyl-7-tetraphenyl)methyl hydrogen sulfate	C20 H16 O4 S	352.077	2.665	C19562	S49327	HMDB0060420	1e-04	0.3957	1	Benzenoids	Phenanthrenes and derivatives	null	other
3.016_173.9982	0.011	0.0008	0.0744	DOR:NOR	C18:neg	2l4rkm5351	C6 H6 O4 S	173.998	3.016	NA	S67018	HMDB0060015	4e-04	2.5735	1	Organic acids and derivatives	Organic sulfuric acids and derivatives	Arylsulfates	down
3.033_209.121	1.2248	0.2241	0.4188	DOR:NOR	C18:neg	NA	C15 H15 N	209.121	3.033	NA	NA	NA	NA	NA	0	NA	NA	NA	other
3.052_774.3406	207.404	0.3924	0.4847	DOR:NOR	C18:neg	NA	C29 H55 N6 O16 P	774.341	3.052	NA	NA	NA	NA	NA	0	NA	NA	NA	other
3.084_294.0993	1.3235	0.0191	0.1591	DOR:NOR	C18:neg	Rosoxacin	C17 H14 N2 O3	294.099	3.084	NA	S253208	HMDB0014955	0.0012	4	1	Organoheterocyclic compounds	Quinolines and derivatives	Quinoline carboxylic acids	up
3.087_209.121	1.1603	0.314	0.4847	DOR:NOR	C18:neg	NA	NA	209.121	3.087	NA	NA	NA	NA	NA	0	NA	NA	NA	other
3.09_440.2249	1.1684	0.427	0.4884	DOR:NOR	C18:neg	NA	C23 H38 O4 P2	440.225	3.09	NA	NA	NA	NA	NA	0	NA	NA	NA	other
3.107_166.0626	0.0975	0.0666	0.2223	DOR:NOR	C18:neg	3-phenyllactic acid	C9 H10 O3	166.063	3.107	C05607	M311	NA	4e-04	2.6193	41	Phenylpropanoids and polyketides	Phenylpropanoic acids	null	other
3.403_278.0517	313.14	0.4053	0.4847	DOR:NOR	C18:neg	NA	C8 H14 N4 O3 S2	278.052	3.403	NA	NA	NA	NA	NA	0	NA	NA	NA	other
3.447_408.13	281.005	0.3953	0.4847	DOR:NOR	C18:neg	NA	C16 H21 N6 O5 P	408.13	3.447	NA	NA	NA	NA	NA	0	NA	NA	NA	other
3.448_193.0734	1636.5	0.4542	0.5084	DOR:NOR	C18:neg	Phenylacetylglycine	C10 H11 N O3	193.073	3.448	C05598	M540	NA	5e-04	2.5767	10	Organic acids and derivatives	Carboxylic acids and derivatives	Amino acids, peptides, and analogues	other
3.45_292.9995	226.93	0.3944	0.4847	DOR:NOR	C18:neg	NA	C2 H8 N5 O10 P	293	3.45	NA	NA	NA	NA	NA	0	NA	NA	NA	other
3.454_380.1049	824.639	0.3995	0.4847	DOR:NOR	C18:neg	Meticillin	C17 H20 N2 O6 S	380.105	3.454	NA	S5862	HMDB0015541	-7e-04	-1.7202	1	Organic acids and derivatives	Carboxylic acids and derivatives	Amino acids, peptides, and analogues	other
3.469_187.1207	1.7976	0.3882	0.4847	DOR:NOR	C18:neg	8-amino-7-oxononanoic acid	C9 H17 N O3	187.121	3.469	NA	S168	NA	2e-04	1.0719	2	NA	NA	NA	other
3.523_193.0559	212.482	0.3996	0.4847	DOR:NOR	C18:neg	NA	C10 H11 N O S	193.056	3.523	NA	NA	NA	NA	NA	0	NA	NA	NA	other
3.528_380.1049	1197.25	0.4036	0.4847	DOR:NOR	C18:neg	Meticillin	C17 H20 N2 O6 S	380.105	3.528	NA	S5862	HMDB0015541	-7e-04	-1.7202	1	Organic acids and derivatives	Carboxylic acids and derivatives	Amino acids, peptides, and analogues	other
3.816_452.0351	271.246	0.3954	0.4847	DOR:NOR	C18:neg	6-hydroxy-5-[(e)-(2-methoxy-5-methyl-4-sulfophenyl)diazenyl]-2-naphthalenesulfonic acid	C18 H16 N2 O8 S2	452.035	3.816	NA	S10677559	HMDB0032884	-3e-04	-0.5699	1	Benzenoids	Naphthalenes	Naphthalene sulfonic acids and derivatives	other
3.82_216.1198	0.8082	0.5863	0.6238	DOR:NOR	C18:neg	NA	NA	216.12	3.82	NA	NA	NA	NA	NA	0	NA	NA	NA	other
3.82_274.1322	839.544	0.3987	0.4847	DOR:NOR	C18:neg	Imazamethabenz	C15 H18 N2 O3	274.132	3.82	NA	S2298855	HMDB0034885	-5e-04	-1.8316	1	Benzenoids	Benzene and substituted derivatives	Benzoic acids and derivatives	other
3.82_308.1199	17683.2	0.4929	0.5393	DOR:NOR	C18:neg	NA	C15 H20 N2 O3 S	308.12	3.82	NA	NA	NA	NA	NA	0	NA	NA	NA	other
3.821_230.1419	4287.06	0.4028	0.4847	DOR:NOR	C18:neg	Ibudilast	C14 H18 N2 O	230.142	3.821	NA	S3543	HMDB0015614	0	0.1416	1	Organoheterocyclic compounds	Pyrazolopyridines	null	other
3.821_352.1098	7529.84	0.4167	0.4847	DOR:NOR	C18:neg	2-{carboxy[(phenylacetyl)amino]methyl}-5,5-dimethyl-1,3-thiazolidine-4-carboxylic acid	C16 H20 N2 O5 S	352.11	3.821	NA	S89419	HMDB0060617	-5e-04	-1.4233	1	Organic acids and derivatives	Carboxylic acids and derivatives	Amino acids, peptides, and analogues	other
3.847_726.2015	398.893	0.397	0.4847	DOR:NOR	C18:neg	NA	C26 H44 N6 O10 P2 S2	726.202	3.847	NA	NA	NA	NA	NA	0	NA	NA	NA	other
3.855_450.0888	179.469	0.3953	0.4847	DOR:NOR	C18:neg	NA	C14 H23 N6 O5 P S2	450.089	3.855	NA	NA	NA	NA	NA	0	NA	NA	NA	other
3.865_390.0345	186.333	0.3969	0.4847	DOR:NOR	C18:neg	NA	C25 H10 O3 S	390.034	3.865	NA	NA	NA	NA	NA	0	NA	NA	NA	other
3.865_660.2296	350.385	0.4002	0.4847	DOR:NOR	C18:neg	NA	C27 H40 N4 O13 S	660.23	3.865	NA	NA	NA	NA	NA	0	NA	NA	NA	other
3.867_230.1419	5990.28	0.4061	0.4847	DOR:NOR	C18:neg	Ibudilast	C14 H18 N2 O	230.142	3.867	NA	S3543	HMDB0015614	0	0.1416	1	Organoheterocyclic compounds	Pyrazolopyridines	null	other
3.867_352.1098	6813.17	0.4063	0.4847	DOR:NOR	C18:neg	2-{carboxy[(phenylacetyl)amino]methyl}-5,5-dimethyl-1,3-thiazolidine-4-carboxylic acid	C16 H20 N2 O5 S	352.11	3.867	NA	S89419	HMDB0060617	-5e-04	-1.4304	1	Organic acids and derivatives	Carboxylic acids and derivatives	Amino acids, peptides, and analogues	other
3.868_415.1055	239.136	0.3979	0.4847	DOR:NOR	C18:neg	(+)-cephalosporin c	C16 H21 N3 O8 S	415.106	3.868	C00916	S58980	HMDB0060450	-5e-04	-1.2821	2	Organic acids and derivatives	Carboxylic acids and derivatives	Amino acids, peptides, and analogues	other
3.869_452.0351	455.264	0.4001	0.4847	DOR:NOR	C18:neg	6-hydroxy-5-[(e)-(2-methoxy-5-methyl-4-sulfophenyl)diazenyl]-2-naphthalenesulfonic acid	C18 H16 N2 O8 S2	452.035	3.869	NA	S10677559	HMDB0032884	-3e-04	-0.5699	1	Benzenoids	Naphthalenes	Naphthalene sulfonic acids and derivatives	other
4.128_380.1047	293.104	0.3971	0.4847	DOR:NOR	C18:neg	Meticillin	C17 H20 N2 O6 S	380.105	4.128	NA	S5862	HMDB0015541	-4e-04	-1.1582	1	Organic acids and derivatives	Carboxylic acids and derivatives	Amino acids, peptides, and analogues	other
4.132_274.1322	362.984	0.4006	0.4847	DOR:NOR	C18:neg	Imazamethabenz	C15 H18 N2 O3	274.132	4.132	NA	S2298855	HMDB0034885	-5e-04	-1.8316	1	Benzenoids	Benzene and substituted derivatives	Benzoic acids and derivatives	other
4.132_452.0351	356.033	0.4005	0.4847	DOR:NOR	C18:neg	6-hydroxy-5-[(e)-(2-methoxy-5-methyl-4-sulfophenyl)diazenyl]-2-naphthalenesulfonic acid	C18 H16 N2 O8 S2	452.035	4.132	NA	S10677559	HMDB0032884	-3e-04	-0.5699	1	Benzenoids	Naphthalenes	Naphthalene sulfonic acids and derivatives	other
4.133_230.1419	1875.59	0.4047	0.4847	DOR:NOR	C18:neg	Ibudilast	C14 H18 N2 O	230.142	4.133	NA	S3543	HMDB0015614	0	0.1416	1	Organoheterocyclic compounds	Pyrazolopyridines	null	other
4.133_308.1199	14073.6	0.449	0.5074	DOR:NOR	C18:neg	NA	C15 H20 N2 O3 S	308.12	4.133	NA	NA	NA	NA	NA	0	NA	NA	NA	other
4.133_352.1098	3268.75	0.4058	0.4847	DOR:NOR	C18:neg	2-{carboxy[(phenylacetyl)amino]methyl}-5,5-dimethyl-1,3-thiazolidine-4-carboxylic acid	C16 H20 N2 O5 S	352.11	4.133	NA	S89419	HMDB0060617	-5e-04	-1.4101	1	Organic acids and derivatives	Carboxylic acids and derivatives	Amino acids, peptides, and analogues	other
4.133_726.2015	321.462	0.4002	0.4847	DOR:NOR	C18:neg	NA	C29 H38 N6 O12 S2	726.202	4.133	NA	NA	NA	NA	NA	0	NA	NA	NA	other
4.135_415.1055	150.94	0.3954	0.4847	DOR:NOR	C18:neg	(+)-cephalosporin c	C16 H21 N3 O8 S	415.106	4.135	C00916	S58980	HMDB0060450	-5e-04	-1.2821	2	Organic acids and derivatives	Carboxylic acids and derivatives	Amino acids, peptides, and analogues	other
4.164_178.0787	0.2113	0.1367	0.3352	DOR:NOR	C18:neg	(2z,12z)-2,12-tetradecadiene-4,6,8,10-tetrayne	C14 H10	178.079	4.164	NA	S30776982	HMDB0033187	-5e-04	-2.6465	1	Hydrocarbons	Unsaturated hydrocarbons	Enynes	other
4.165_146.0938	0.2573	0.2118	0.4188	DOR:NOR	C18:neg	N-butyl lactate	C7 H14 O3	146.094	4.165	NA	S8409	HMDB0040254	6e-04	3.7703	7	Organic acids and derivatives	Carboxylic acids and derivatives	Carboxylic acid derivatives	other
4.273_334.0992	12977.3	0.4089	0.4847	DOR:NOR	C18:neg	Benzylpenicillin	C16 H18 N2 O4 S	334.099	4.273	C05551	S5693	HMDB0015186	-4e-04	-1.3359	1	Organic acids and derivatives	Carboxylic acids and derivatives	Amino acids, peptides, and analogues	other
4.273_397.0948	2586.01	0.4065	0.4847	DOR:NOR	C18:neg	NA	C14 H24 N O8 P S	397.095	4.273	NA	NA	NA	NA	NA	0	NA	NA	NA	other
4.274_256.1214	137.556	0.3996	0.4847	DOR:NOR	C18:neg	1-(9h-beta-carbolin-1-yl)-1,4-butanediol	C15 H16 N2 O2	256.121	4.274	NA	S35013869	HMDB0035193	-3e-04	-1.0069	1	Alkaloids and derivatives	Harmala alkaloids	null	other
4.327_230.1419	735.462	0.4025	0.4847	DOR:NOR	C18:neg	Ibudilast	C14 H18 N2 O	230.142	4.327	NA	S3543	HMDB0015614	0	0.1416	1	Organoheterocyclic compounds	Pyrazolopyridines	null	other
4.329_352.1098	3048.19	0.4059	0.4847	DOR:NOR	C18:neg	2-{carboxy[(phenylacetyl)amino]methyl}-5,5-dimethyl-1,3-thiazolidine-4-carboxylic acid	C16 H20 N2 O5 S	352.11	4.329	NA	S89419	HMDB0060617	-5e-04	-1.4682	1	Organic acids and derivatives	Carboxylic acids and derivatives	Amino acids, peptides, and analogues	other
4.334_452.0351	225.568	0.3989	0.4847	DOR:NOR	C18:neg	6-hydroxy-5-[(e)-(2-methoxy-5-methyl-4-sulfophenyl)diazenyl]-2-naphthalenesulfonic acid	C18 H16 N2 O8 S2	452.035	4.334	NA	S10677559	HMDB0032884	-3e-04	-0.5699	1	Benzenoids	Naphthalenes	Naphthalene sulfonic acids and derivatives	other
4.335_415.1055	164.813	0.3976	0.4847	DOR:NOR	C18:neg	(+)-cephalosporin c	C16 H21 N3 O8 S	415.106	4.335	C00916	S58980	HMDB0060450	-5e-04	-1.2821	2	Organic acids and derivatives	Carboxylic acids and derivatives	Amino acids, peptides, and analogues	other
4.337_213.9865	1.2202	0.2188	0.4188	DOR:NOR	C18:neg	NA	NA	213.987	4.337	NA	NA	NA	NA	NA	0	NA	NA	NA	other
4.574_402.2484	16.0778	0.2424	0.4365	DOR:NOR	C18:neg	(5e)-2,10-diamino-5-{[(5-amino-5-carboxypentyl)amino]methyl}-5-undecenedioic acid (non-preferred name)	C18 H34 N4 O6	402.248	4.574	NA	S35013192	HMDB0030407	-6e-04	-1.3997	1	Organic acids and derivatives	Carboxylic acids and derivatives	Amino acids, peptides, and analogues	other
4.665_419.0769	379.347	0.4032	0.4847	DOR:NOR	C18:neg	NA	C15 H24 N3 O3 P3 S	419.077	4.665	NA	NA	NA	NA	NA	0	NA	NA	NA	other
4.683_256.1213	917.311	0.4046	0.4847	DOR:NOR	C18:neg	1-(9h-beta-carbolin-1-yl)-1,4-butanediol	C15 H16 N2 O2	256.121	4.683	NA	S35013869	HMDB0035193	-1e-04	-0.5303	1	Alkaloids and derivatives	Harmala alkaloids	null	other
4.683_290.1094	1481.45	0.4056	0.4847	DOR:NOR	C18:neg	NA	C15 H18 N2 O2 S	290.109	4.683	NA	NA	NA	NA	NA	0	NA	NA	NA	other
4.684_334.0992	9891.57	0.4007	0.4847	DOR:NOR	C18:neg	Benzylpenicillin	C16 H18 N2 O4 S	334.099	4.684	C05551	S5693	HMDB0015186	-5e-04	-1.4095	1	Organic acids and derivatives	Carboxylic acids and derivatives	Amino acids, peptides, and analogues	other
4.689_402.0866	163.555	0.3997	0.4847	DOR:NOR	C18:neg	4-phosphopantothenoylcysteine	C12 H23 N2 O9 P S	402.087	4.689	C04352	S389278	HMDB0001117	-4e-04	-1.0951	2	Organic acids and derivatives	Peptidomimetics	Hybrid peptides	other
4.861_172.1096	0.2723	0.2319	0.4274	DOR:NOR	C18:neg	Oi1695000	C9 H16 O3	172.11	4.861	NA	S15496	HMDB0040165	4e-04	2.2294	10	Organic acids and derivatives	Keto acids and derivatives	Gamma-keto acids and derivatives	other
4.909_465.1398	158.414	0.4047	0.4847	DOR:NOR	C18:neg	NA	C21 H27 N3 O5 S2	465.14	4.909	NA	NA	NA	NA	NA	0	NA	NA	NA	other
4.993_256.1213	987.009	0.4497	0.5074	DOR:NOR	C18:neg	1-(9h-beta-carbolin-1-yl)-1,4-butanediol	C15 H16 N2 O2	256.121	4.993	NA	S35013869	HMDB0035193	-1e-04	-0.5303	1	Alkaloids and derivatives	Harmala alkaloids	null	other
4.997_334.0992	1079.9	0.4599	0.5118	DOR:NOR	C18:neg	Benzylpenicillin	C16 H18 N2 O4 S	334.099	4.997	C05551	S5693	HMDB0015186	-5e-04	-1.4115	1	Organic acids and derivatives	Carboxylic acids and derivatives	Amino acids, peptides, and analogues	other
4.998_139.0263	1.8716	0.6358	0.6704	DOR:NOR	C18:neg	3-hydroxypicolinic acid	C6 H5 N O3	139.026	4.998	C18620	M205	NA	7e-04	4.9233	4	Organoheterocyclic compounds	Pyridines and derivatives	Pyridinecarboxylic acids and derivatives	other
5.078_228.1364	0.0571	0.2238	0.4188	DOR:NOR	C18:neg	Traumatic acid	C12 H20 O4	228.136	5.078	C16308	S4446155	HMDB0000933	-2e-04	-0.9292	2	Lipids and lipid-like molecules	Fatty Acyls	Fatty acids and conjugates	other
5.252_324.115	1414.22	0.411	0.4847	DOR:NOR	C18:neg	Acetohexamide	C15 H20 N2 O4 S	324.115	5.252	NA	S1912	HMDB0014558	-6e-04	-1.8301	1	Organic oxygen compounds	Organooxygen compounds	Carbonyl compounds	other
5.298_216.1363	0.5682	0.5415	0.5805	DOR:NOR	C18:neg	1780537	C11 H20 O4	216.136	5.298	NA	S15037	HMDB0000888	-1e-04	-0.5572	2	Lipids and lipid-like molecules	Fatty Acyls	Fatty acids and conjugates	other
5.369_226.1207	0.022	0.2584	0.4483	DOR:NOR	C18:neg	Allixin	C12 H18 O4	226.121	5.369	NA	S77892	HMDB0040705	-2e-04	-0.8316	2	Organoheterocyclic compounds	Pyrans	Pyranones and derivatives	other
5.41_527.1731	1215.1	0.4147	0.4847	DOR:NOR	C18:neg	NA	C26 H29 N3 O7 S	527.173	5.41	NA	NA	NA	NA	NA	0	NA	NA	NA	other
5.426_170.0938	0.0878	0.284	0.4726	DOR:NOR	C18:neg	Mfcd00036527	C9 H14 O3	170.094	5.426	NA	S4515658	HMDB0038276	5e-04	2.7462	2	Organic acids and derivatives	Keto acids and derivatives	Alpha-keto acids and derivatives	other
5.443_429.1211	1209.44	0.4134	0.4847	DOR:NOR	C18:neg	NA	C19 H30 N O2 P3 S	429.121	5.443	NA	NA	NA	NA	NA	0	NA	NA	NA	other
5.445_288.1479	551.78	0.4124	0.4847	DOR:NOR	C18:neg	Imazamethabenz-methyl	C16 H20 N2 O3	288.148	5.445	NA	S49450	HMDB0034913	-5e-04	-1.8468	2	Benzenoids	Benzene and substituted derivatives	Benzoic acids and derivatives	other
5.471_334.0992	172.024	0.4105	0.4847	DOR:NOR	C18:neg	Benzylpenicillin	C16 H18 N2 O4 S	334.099	5.471	C05551	S5693	HMDB0015186	-5e-04	-1.4115	1	Organic acids and derivatives	Carboxylic acids and derivatives	Amino acids, peptides, and analogues	other
5.473_230.1419	502.397	0.4122	0.4847	DOR:NOR	C18:neg	Ibudilast	C14 H18 N2 O	230.142	5.473	NA	S3543	HMDB0015614	0	0.1416	1	Organoheterocyclic compounds	Pyrazolopyridines	null	other
5.473_234.1004	143.181	0.4102	0.4847	DOR:NOR	C18:neg	5-methoxy-l-tryptophan	C12 H14 N2 O3	234.1	5.473	NA	S133110	HMDB0002339	0	0.0746	2	Organoheterocyclic compounds	Indoles and derivatives	Tryptamines and derivatives	other
5.628_402.0866	153.858	0.42	0.4847	DOR:NOR	C18:neg	4-phosphopantothenoylcysteine	C12 H23 N2 O9 P S	402.087	5.628	C04352	S389278	HMDB0001117	-4e-04	-1.0951	2	Organic acids and derivatives	Peptidomimetics	Hybrid peptides	other
5.655_334.0992	7116.7	0.4187	0.4847	DOR:NOR	C18:neg	Benzylpenicillin	C16 H18 N2 O4 S	334.099	5.655	C05551	S5693	HMDB0015186	-4e-04	-1.2978	1	Organic acids and derivatives	Carboxylic acids and derivatives	Amino acids, peptides, and analogues	other
5.691_402.0866	253.702	0.4128	0.4847	DOR:NOR	C18:neg	4-phosphopantothenoylcysteine	C12 H23 N2 O9 P S	402.087	5.691	C04352	S389278	HMDB0001117	-4e-04	-1.0951	2	Organic acids and derivatives	Peptidomimetics	Hybrid peptides	other
6.047_229.168	1.9233	0.6154	0.6513	DOR:NOR	C18:neg	1872050	C12 H23 N O3	229.168	6.047	NA	S1361783	HMDB0013267	-2e-04	-0.8573	1	Organic acids and derivatives	Carboxylic acids and derivatives	Amino acids, peptides, and analogues	other
6.328_166.0624	11.1179	0.4623	0.5135	DOR:NOR	C18:neg	3-methoxyphenylacetic acid	C9 H10 O3	166.062	6.328	null	M207	HMDB0059969	6e-04	3.9057	41	Benzenoids	Phenol ethers	Anisoles	other
6.397_483.1835	282.195	0.6021	0.6396	DOR:NOR	C18:neg	NA	C24 H30 N5 O2 P S	483.183	6.397	NA	NA	NA	NA	NA	0	NA	NA	NA	other
6.462_200.1412	0.1274	0.2643	0.4552	DOR:NOR	C18:neg	9-hydroxy-10-undecenoic acid	C11 H20 O3	200.141	6.462	NA	S8640809	HMDB0032662	0	0.2011	3	Organic acids and derivatives	Hydroxy acids and derivatives	Medium-chain hydroxy acids and derivatives	other
6.523_224.1415	0.0175	0.351	0.4847	DOR:NOR	C18:neg	Methyl jasmonate	C13 H20 O3	224.142	6.523	C11512	S4445210	HMDB0036583	-2e-04	-0.9432	10	Lipids and lipid-like molecules	Fatty Acyls	Lineolic acids and derivatives	other
6.66_256.1213	200.419	0.3325	0.4847	DOR:NOR	C18:neg	1-(9h-beta-carbolin-1-yl)-1,4-butanediol	C15 H16 N2 O2	256.121	6.66	NA	S35013869	HMDB0035193	-1e-04	-0.5303	1	Alkaloids and derivatives	Harmala alkaloids	null	other
6.66_334.0992	412.824	0.366	0.4847	DOR:NOR	C18:neg	Benzylpenicillin	C16 H18 N2 O4 S	334.099	6.66	C05551	S5693	HMDB0015186	-5e-04	-1.4115	1	Organic acids and derivatives	Carboxylic acids and derivatives	Amino acids, peptides, and analogues	other
6.69_243.1835	5.5994	0.419	0.4847	DOR:NOR	C18:neg	N-undecanoylglycine	C13 H25 N O3	243.184	6.69	NA	S399857	HMDB0013286	0	-0.154	1	Organic acids and derivatives	Carboxylic acids and derivatives	Amino acids, peptides, and analogues	other
6.69_265.1658	19.1351	0.3208	0.4847	DOR:NOR	C18:neg	NA	C9 H24 N5 O2 P	265.166	6.69	NA	NA	NA	NA	NA	0	NA	NA	NA	other
6.69_328.1616	12.4625	0.3707	0.4847	DOR:NOR	C18:neg	Levomepromazine	C19 H24 N2 O S	328.162	6.69	NA	S65239	HMDB0015474	-7e-04	-2.1805	1	Organoheterocyclic compounds	Benzothiazines	Phenothiazines	other
6.756_316.1892	2.0953	0.345	0.4847	DOR:NOR	C18:neg	(6s)-2,6-anhydro-6-[(1s)-2-isopropyl-5-methylcyclohexyl]-l-gulonic acid	C16 H28 O6	316.189	6.756	NA	S35031680	HMDB0060004	-6e-04	-1.7787	1	Lipids and lipid-like molecules	Prenol lipids	Terpene glycosides	other
6.832_224.1415	0.0149	0.2585	0.4483	DOR:NOR	C18:neg	Methyl jasmonate	C13 H20 O3	224.142	6.832	C11512	S4445210	HMDB0036583	-2e-04	-0.9432	10	Lipids and lipid-like molecules	Fatty Acyls	Lineolic acids and derivatives	other
6.858_244.1676	4.4714	0.3698	0.4847	DOR:NOR	C18:neg	Brassylic acid	C13 H24 O4	244.168	6.858	NA	S10026	HMDB0002327	-1e-04	-0.5559	3	Lipids and lipid-like molecules	Fatty Acyls	Fatty acids and conjugates	other
7.079_188.1411	0.216	0.099	0.2798	DOR:NOR	C18:neg	3-hydroxydecanoic acid	C10 H20 O3	188.141	7.079	NA	M200	NA	1e-04	0.7544	14	NA	NA	NA	other
7.134_210.0927	41.4186	0.4067	0.4847	DOR:NOR	C18:neg	2-ethylhexyl hydrogen sulfate	C8 H18 O4 S	210.093	7.134	NA	S29097	HMDB0033373	-1e-04	-0.5728	1	Organic acids and derivatives	Organic sulfuric acids and derivatives	Sulfuric acid esters	other
7.156_352.2258	0.0201	0.0265	0.1691	DOR:NOR	C18:neg	Prostaglandin e2	C20 H32 O5	352.226	7.156	C00584	M1357	NA	-9e-04	-2.4177	29	Lipids and lipid-like molecules	Fatty Acyls	Eicosanoids	down
7.176_330.1985	0.0036	0.0035	0.0902	DOR:NOR	C18:neg	NA	C16 H32 N2 O P2	330.199	7.176	NA	NA	NA	NA	NA	0	NA	NA	NA	down
7.314_326.2101	0.0174	0.3147	0.4847	DOR:NOR	C18:neg	2,4,9a-trimethoxy-3,4a,5-trimethyl-2,4,4a,5,6,7,8,8a,9,9a-decahydronaphtho[2,3-b]furan-6-ol	C18 H30 O5	326.21	7.314	NA	S35013420	HMDB0031963	-8e-04	-2.4738	1	Organoheterocyclic compounds	Naphthofurans	null	other
7.658_326.2102	0.0316	0.4675	0.5166	DOR:NOR	C18:neg	2,4,9a-trimethoxy-3,4a,5-trimethyl-2,4,4a,5,6,7,8,8a,9,9a-decahydronaphtho[2,3-b]furan-6-ol	C18 H30 O5	326.21	7.658	NA	S35013420	HMDB0031963	-9e-04	-2.6562	1	Organoheterocyclic compounds	Naphthofurans	null	other
7.666_554.3516	0.5783	0.314	0.4847	DOR:NOR	C18:neg	NA	C28 H52 N4 O3 P2	554.352	7.666	NA	NA	NA	NA	NA	0	NA	NA	NA	other
7.672_350.2102	0.0088	0.1943	0.417	DOR:NOR	C18:neg	15-ketoprostaglandin e2	C20 H30 O5	350.21	7.672	NA	S4444303	HMDB0003175	-9e-04	-2.4692	19	Lipids and lipid-like molecules	Fatty Acyls	Eicosanoids	other
7.706_368.2207	0.0063	0.1997	0.4188	DOR:NOR	C18:neg	Prostaglandin g2	C20 H32 O6	368.221	7.706	C05956	S4444406	HMDB0003235	-8e-04	-2.2747	14	Lipids and lipid-like molecules	Fatty Acyls	Eicosanoids	other
7.713_271.2154	2.4852	0.4215	0.4847	DOR:NOR	C18:neg	N-tridecanoylglycine	C15 H29 N O3	271.215	7.713	NA	S21513291	HMDB0013317	-7e-04	-2.5258	1	Organic acids and derivatives	Carboxylic acids and derivatives	Amino acids, peptides, and analogues	other
7.774_281.0694	3.6346	0.2503	0.4423	DOR:NOR	C18:neg	NA	C16 H11 N O4	281.069	7.774	NA	NA	NA	NA	NA	0	NA	NA	NA	other
7.774_354.2416	0.0119	0.1029	0.2859	DOR:NOR	C18:neg	Prostaglandin e1	C20 H34 O5	354.242	7.774	C04741	M1356	NA	-9e-04	-2.6419	23	Lipids and lipid-like molecules	Fatty Acyls	Eicosanoids	other
7.802_308.1996	0.0659	0.3182	0.4847	DOR:NOR	C18:neg	5-o-methyl embelin	C18 H28 O4	308.2	7.802	NA	S149914	HMDB0040867	-8e-04	-2.7139	8	Organooxygen compounds	Carbonyl compounds	Ketones	other
7.821_378.2414	0.0054	0.2042	0.4188	DOR:NOR	C18:neg	Methyl 14-acetoxy-5-hydroxy-5,9-dimethyltetracyclo[11.2.1.0~1,10~.0~4,9~]hexadecane-14-carboxylate	C22 H34 O5	378.241	7.821	NA	S35013942	HMDB0035508	-7e-04	-1.9722	1	Lipids and lipid-like molecules	Prenol lipids	Diterpenoids	other
7.843_370.2363	0.0047	0.1378	0.3365	DOR:NOR	C18:neg	Txb2	C20 H34 O6	370.236	7.843	NA	S4446261	HMDB0003252	-7e-04	-2.0107	5	Lipids and lipid-like molecules	Fatty Acyls	Eicosanoids	other
7.958_378.2414	0.0033	0.1888	0.4132	DOR:NOR	C18:neg	Methyl 14-acetoxy-5-hydroxy-5,9-dimethyltetracyclo[11.2.1.0~1,10~.0~4,9~]hexadecane-14-carboxylate	C22 H34 O5	378.241	7.958	NA	S35013942	HMDB0035508	-7e-04	-1.9722	1	Lipids and lipid-like molecules	Prenol lipids	Diterpenoids	other
8.002_312.2307	0.0283	0.2005	0.4188	DOR:NOR	C18:neg	(10e,12z)-9-hydroperoxy-10,12-octadecadienoic acid	C18 H32 O4	312.231	8.002	NA	S4944227	HMDB0006940	-6e-04	-1.9744	10	Lipids and lipid-like molecules	Fatty Acyls	Lineolic acids and derivatives	other
8.074_328.2257	0.0155	0.2202	0.4188	DOR:NOR	C18:neg	(10e,15z)-9,12,13-trihydroxy-10,15-octadecadienoic acid	C18 H32 O5	328.226	8.074	NA	S22912859	HMDB0035919	-7e-04	-2.2297	3	Lipids and lipid-like molecules	Fatty Acyls	Lineolic acids and derivatives	other
8.079_310.2152	0.0137	0.211	0.4188	DOR:NOR	C18:neg	12(13)ep-9-kode	C18 H30 O4	310.215	8.079	NA	S4446134	HMDB0013623	-8e-04	-2.5995	4	Lipids and lipid-like molecules	Fatty Acyls	Fatty acids and conjugates	other
8.122_370.2362	0.0043	0.2093	0.4188	DOR:NOR	C18:neg	Txb2	C20 H34 O6	370.236	8.122	NA	S4446261	HMDB0003252	-7e-04	-1.7664	5	Lipids and lipid-like molecules	Fatty Acyls	Eicosanoids	other
8.157_312.2307	0.0284	0.1858	0.4132	DOR:NOR	C18:neg	(10e,12z)-9-hydroperoxy-10,12-octadecadienoic acid	C18 H32 O4	312.231	8.157	NA	S4944227	HMDB0006940	-6e-04	-1.96	10	Lipids and lipid-like molecules	Fatty Acyls	Lineolic acids and derivatives	other
8.223_328.2257	0.015	0.2325	0.4274	DOR:NOR	C18:neg	(10e,15z)-9,12,13-trihydroxy-10,15-octadecadienoic acid	C18 H32 O5	328.226	8.223	NA	S22912859	HMDB0035919	-7e-04	-2.2789	3	Lipids and lipid-like molecules	Fatty Acyls	Lineolic acids and derivatives	other
8.266_312.2307	0.0394	0.1412	0.3389	DOR:NOR	C18:neg	(10e,12z)-9-hydroperoxy-10,12-octadecadienoic acid	C18 H32 O4	312.231	8.266	NA	S4944227	HMDB0006940	-6e-04	-2.0275	10	Lipids and lipid-like molecules	Fatty Acyls	Lineolic acids and derivatives	other
8.268_314.2465	0.2469	0.034	0.1825	DOR:NOR	C18:neg	Vs1150000	C18 H34 O4	314.247	8.268	NA	S13837584	HMDB0041220	-8e-04	-2.5258	5	Lipids and lipid-like molecules	Fatty Acyls	Fatty acid esters	down
8.275_448.2679	0.007	0.2224	0.4188	DOR:NOR	C18:neg	NA	C23 H36 N4 O5	448.268	8.275	NA	NA	NA	NA	NA	0	NA	NA	NA	other
8.292_310.2152	0.0207	0.2206	0.4188	DOR:NOR	C18:neg	12(13)ep-9-kode	C18 H30 O4	310.215	8.292	NA	S4446134	HMDB0013623	-8e-04	-2.4926	4	Lipids and lipid-like molecules	Fatty Acyls	Fatty acids and conjugates	other
8.317_312.2307	0.043	0.114	0.3052	DOR:NOR	C18:neg	(10e,12z)-9-hydroperoxy-10,12-octadecadienoic acid	C18 H32 O4	312.231	8.317	NA	S4944227	HMDB0006940	-6e-04	-1.9444	10	Lipids and lipid-like molecules	Fatty Acyls	Lineolic acids and derivatives	other
8.317_370.2362	0.0086	0.2276	0.4226	DOR:NOR	C18:neg	Txb2	C20 H34 O6	370.236	8.317	NA	S4446261	HMDB0003252	-7e-04	-1.7664	5	Lipids and lipid-like molecules	Fatty Acyls	Eicosanoids	other
8.512_450.1818	55.1373	0.2748	0.461	DOR:NOR	C18:neg	4-hydroxy-3-(hydroxymethyl)-6,6,7b-trimethyl-2,4,4a,5,6,7,7a,7b-octahydro-1h-cyclobuta[e]inden-2-yl 3-chloro-6-hydroxy-4-methoxy-2-methylbenzoate	C24 H31 Cl O6	450.182	8.512	NA	S28576292	HMDB0035062	-8e-04	-1.8606	1	Lipids and lipid-like molecules	Prenol lipids	Sesquiterpenoids	other
8.547_286.2151	0.0385	0.2175	0.4188	DOR:NOR	C18:neg	Hexadecanedioic acid	C16 H30 O4	286.215	8.547	C19615	M2712	NA	-7e-04	-2.524	3	Lipids and lipid-like molecules	Fatty Acyls	Fatty acids and conjugates	other
8.649_310.2152	0.0204	0.2089	0.4188	DOR:NOR	C18:neg	12(13)ep-9-kode	C18 H30 O4	310.215	8.649	NA	S4446134	HMDB0013623	-8e-04	-2.493	4	Lipids and lipid-like molecules	Fatty Acyls	Fatty acids and conjugates	other
8.68_296.2356	0.087	0.0335	0.1821	DOR:NOR	C18:neg	13s-hydroxyoctadecadienoic acid	C18 H32 O3	296.236	8.68	C14762	S4947055	HMDB0004667	-5e-04	-1.5196	10	Lipids and lipid-like molecules	Fatty Acyls	Lineolic acids and derivatives	down
8.723_340.262	0.0143	0.1359	0.3352	DOR:NOR	C18:neg	NA	C20 H36 O4	340.262	8.723	NA	NA	NA	NA	NA	0	NA	NA	NA	other
8.746_356.2573	0.0112	0.2743	0.461	DOR:NOR	C18:neg	Prostaglandin f1α	C20 H36 O5	356.257	8.746	C06475	M1358	NA	-0.001	-2.8393	3	Lipids and lipid-like molecules	Fatty Acyls	Eicosanoids	other
8.839_294.2202	0.0307	0.1612	0.3761	DOR:NOR	C18:neg	13-kode	C18 H30 O3	294.22	8.839	C14765	S4949634	HMDB0004668	-7e-04	-2.3034	24	Lipids and lipid-like molecules	Fatty Acyls	Lineolic acids and derivatives	other
8.884_402.1305	0.868	0.5084	0.551	DOR:NOR	C18:neg	Nobiletin	C21 H22 O8	402.13	8.884	NA	S65283	HMDB0029540	9e-04	2.324	6	Phenylpropanoids and polyketides	Flavonoids	O-methylated flavonoids	other
8.921_312.2307	0.0025	0.1936	0.417	DOR:NOR	C18:neg	(10e,12z)-9-hydroperoxy-10,12-octadecadienoic acid	C18 H32 O4	312.231	8.921	NA	S4944227	HMDB0006940	-6e-04	-1.9318	10	Lipids and lipid-like molecules	Fatty Acyls	Lineolic acids and derivatives	other
8.922_380.2181	0.0014	0.2199	0.4188	DOR:NOR	C18:neg	1-(4-hydroxy-3-methoxyphenyl)-3,5-decanediyl diacetate	C21 H32 O6	380.218	8.922	NA	S4476431	HMDB0040568	0.0018	4.6826	1	Lipids and lipid-like molecules	Fatty Acyls	Fatty alcohol esters	other
8.922_397.2081	0.0018	0.203	0.4188	DOR:NOR	C18:neg	NA	C17 H38 N O3 P3	397.208	8.922	NA	NA	NA	NA	NA	0	NA	NA	NA	other
8.922_646.4429	0.0022	0.2241	0.4188	DOR:NOR	C18:neg	NA	C34 H58 N6 O6	646.443	8.922	NA	NA	NA	NA	NA	0	NA	NA	NA	other
8.929_296.2355	0.0826	0.0379	0.1825	DOR:NOR	C18:neg	13s-hydroxyoctadecadienoic acid	C18 H32 O3	296.236	8.929	C14762	S4947055	HMDB0004667	-4e-04	-1.3053	10	Lipids and lipid-like molecules	Fatty Acyls	Lineolic acids and derivatives	down
8.935_414.2623	0.0396	0.2173	0.4188	DOR:NOR	C18:neg	Ascorbyl palmitate	C22 H38 O7	414.262	8.935	NA	S10606454	HMDB0039883	-6e-04	-1.3591	1	Lipids and lipid-like molecules	Fatty Acyls	Fatty acid esters	other
8.989_320.2357	0.0194	0.0168	0.1591	DOR:NOR	C18:neg	20-hydroxy-(5z,8z,11z,14z)-eicosatetraenoic acid	C20 H32 O3	320.236	8.989	C14748	M1450	NA	-5e-04	-1.6563	34	Lipids and lipid-like molecules	Fatty Acyls	Fatty acids and conjugates	down
8.99_318.2201	0.0048	0.0792	0.2371	DOR:NOR	C18:neg	13-hydroxykaur-16-en-18-oic acid	C20 H30 O3	318.22	8.99	NA	S277096	HMDB0036706	-6e-04	-1.9616	36	Lipids and lipid-like molecules	Prenol lipids	Diterpenoids	other
8.995_422.2441	0.0067	0.2074	0.4188	DOR:NOR	C18:neg	NA	C22 H35 Cl N4 O2	422.244	8.995	NA	NA	NA	NA	NA	0	NA	NA	NA	other
8.996_432.2728	0.0034	0.2228	0.4188	DOR:NOR	C18:neg	NA	C22 H40 O8	432.273	8.996	NA	NA	NA	NA	NA	0	NA	NA	NA	other
9.031_312.2308	0.0096	0.2225	0.4188	DOR:NOR	C18:neg	(10e,12z)-9-hydroperoxy-10,12-octadecadienoic acid	C18 H32 O4	312.231	9.031	NA	S4944227	HMDB0006940	-7e-04	-2.2912	10	Lipids and lipid-like molecules	Fatty Acyls	Lineolic acids and derivatives	other
9.045_314.246	0.0996	0.188	0.4132	DOR:NOR	C18:neg	Vs1150000	C18 H34 O4	314.246	9.045	NA	S13837584	HMDB0041220	-3e-04	-0.9989	5	Lipids and lipid-like molecules	Fatty Acyls	Fatty acid esters	other
9.054_296.2359	0.1769	0.1897	0.4132	DOR:NOR	C18:neg	13s-hydroxyoctadecadienoic acid	C18 H32 O3	296.236	9.054	C14762	S4947055	HMDB0004667	-7e-04	-2.4146	10	Lipids and lipid-like molecules	Fatty Acyls	Lineolic acids and derivatives	other
9.092_298.2514	0.1984	0.0323	0.1821	DOR:NOR	C18:neg	Rg1300000	C18 H34 O3	298.251	9.092	C19418	S15081	HMDB0061650	-6e-04	-2.1135	8	Lipids and lipid-like molecules	Fatty Acyls	Lineolic acids and derivatives	down
9.132_395.1596	0.8086	0.4293	0.49	DOR:NOR	C18:neg	NA	C14 H30 N5 O2 P S2	395.16	9.132	NA	NA	NA	NA	NA	0	NA	NA	NA	other
9.145_296.2355	0.1102	0.3022	0.4847	DOR:NOR	C18:neg	13s-hydroxyoctadecadienoic acid	C18 H32 O3	296.236	9.145	C14762	S4947055	HMDB0004667	-4e-04	-1.4016	10	Lipids and lipid-like molecules	Fatty Acyls	Lineolic acids and derivatives	other
9.152_434.2887	0.0042	0.193	0.417	DOR:NOR	C18:neg	1,4-anhydro-6-o-dodecanoyl-2,3-bis-o-(2-hydroxyethyl)-d-glucitol	C22 H42 O8	434.289	9.152	NA	S17215564	HMDB0037183	-7e-04	-1.5766	1	Lipids and lipid-like molecules	Fatty Acyls	Fatty acid esters	other
9.162_382.2338	0.0061	0.2189	0.4188	DOR:NOR	C18:neg	NA	C21 H34 O6	382.234	9.162	NA	NA	NA	NA	NA	0	NA	NA	NA	other
9.174_280.1714	2.5355	0.5389	0.5788	DOR:NOR	C18:neg	NA	C14 H24 N4 S	280.171	9.174	NA	NA	NA	NA	NA	0	NA	NA	NA	other
9.177_314.2463	0.0784	0.3489	0.4847	DOR:NOR	C18:neg	Vs1150000	C18 H34 O4	314.246	9.177	NA	S13837584	HMDB0041220	-6e-04	-1.9711	5	Lipids and lipid-like molecules	Fatty Acyls	Fatty acid esters	other
9.177_338.2462	0.0068	0.0152	0.1591	DOR:NOR	C18:neg	11-deoxy prostaglandin f2β	C20 H34 O4	338.246	9.177	NA	M4600	NA	-5e-04	-1.5955	9	NA	NA	NA	down
9.178_320.2357	0.0088	0.0099	0.1372	DOR:NOR	C18:neg	11,12-epoxy-(5z,8z,11z)-icosatrienoic acid	C20 H32 O3	320.236	9.178	C14770	M1453	NA	-6e-04	-1.8309	34	null	null	null	down
9.187_380.1642	1.4349	0.2148	0.4188	DOR:NOR	C18:neg	Ecabet	C20 H28 O5 S	380.164	9.187	NA	S59201	HMDB0015613	0.0015	3.9923	1	Lipids and lipid-like molecules	Prenol lipids	Diterpenoids	other
9.206_298.2514	0.5835	0.4964	0.5406	DOR:NOR	C18:neg	Rg1300000	C18 H34 O3	298.251	9.206	C19418	S15081	HMDB0061650	-7e-04	-2.202	8	Lipids and lipid-like molecules	Fatty Acyls	Lineolic acids and derivatives	other
9.231_296.2359	0.0488	0.2334	0.4278	DOR:NOR	C18:neg	13s-hydroxyoctadecadienoic acid	C18 H32 O3	296.236	9.231	C14762	S4947055	HMDB0004667	-7e-04	-2.4146	10	Lipids and lipid-like molecules	Fatty Acyls	Lineolic acids and derivatives	other
9.302_661.176	0.5481	0.7774	0.7995	DOR:NOR	C18:neg	NA	C38 H33 N O6 P2	661.176	9.302	NA	NA	NA	NA	NA	0	NA	NA	NA	other
9.314_422.2349	6.7709	0.2703	0.4606	DOR:NOR	C18:neg	1,4-bis(2-ethylhexyl) sulfosuccinate	C20 H38 O7 S	422.235	9.314	NA	S10862	HMDB0032386	-0.0011	-2.4885	1	Lipids and lipid-like molecules	Fatty Acyls	Fatty acid esters	other
9.334_300.2672	1.6113	0.4067	0.4847	DOR:NOR	C18:neg	12-hsa	C18 H36 O3	300.267	9.334	NA	S7501	HMDB0061706	-7e-04	-2.3823	11	Lipids and lipid-like molecules	Fatty Acyls	Fatty acids and conjugates	other
9.358_324.267	0.0114	0.0155	0.1591	DOR:NOR	C18:neg	(11e)-15-oxo-11-icosenoic acid	C20 H36 O3	324.267	9.358	NA	S30776790	HMDB0029797	-5e-04	-1.6851	3	Lipids and lipid-like molecules	Fatty Acyls	Fatty acids and conjugates	down
9.36_346.2517	0.0054	0.0549	0.2055	DOR:NOR	C18:neg	6-(pentadeca-(8e)-enyl)salicylic acid	C22 H34 O3	346.252	9.36	NA	S4476443	HMDB0033897	-9e-04	-2.508	6	Benzenoids	Benzene and substituted derivatives	Benzoic acids and derivatives	other
9.397_620.2975	0.0044	0.0041	0.0902	DOR:NOR	C18:neg	Lysophosphatidylinositol	C29 H49 O12 P	620.298	9.397	NA	S32821362	HMDB0061690	-0.0013	-2.1299	2	Lipids and lipid-like molecules	Glycerophospholipids	Glycerophosphoinositols	down
9.405_348.1795	1.4228	0.9754	0.9821	DOR:NOR	C18:neg	4-hydroxy-5-(2-hydroxy-2-propanyl)-2-methylbicyclo[3.1.0]hex-2-yl hexopyranoside	C16 H28 O8	348.18	9.405	NA	S74886400	HMDB0033645	-0.0011	-3.2082	1	Lipids and lipid-like molecules	Prenol lipids	Terpene glycosides	other
9.405_667.0682	1.4016	0.6092	0.6459	DOR:NOR	C18:neg	NA	C36 H17 N3 O9 S	667.068	9.405	NA	NA	NA	NA	NA	0	NA	NA	NA	other
9.421_322.2516	0.0039	0.057	0.2055	DOR:NOR	C18:neg	15s-hydroxyeicosatrienoic acid	C20 H34 O3	322.252	9.421	NA	S4446269	HMDB0005045	-8e-04	-2.5054	8	Lipids and lipid-like molecules	Fatty Acyls	Eicosanoids	other
9.425_340.2621	0.0046	0.0648	0.2203	DOR:NOR	C18:neg	NA	C20 H36 O4	340.262	9.425	NA	NA	NA	NA	NA	0	NA	NA	NA	other
9.427_394.1798	1.4285	0.2484	0.4417	DOR:NOR	C18:neg	Triamcinolone	C21 H27 F O6	394.18	9.427	NA	S29046	HMDB0014758	-6e-04	-1.5725	2	Lipids and lipid-like molecules	Steroids and steroid derivatives	Hydroxysteroids	other
9.427_430.1618	0.8078	0.3151	0.4847	DOR:NOR	C18:neg	4-methoxy-6-[4-(3,4,5-trimethoxyphenyl)tetrahydro-1h,3h-furo[3,4-c]furan-1-yl]-1,3-benzodioxole	C23 H26 O8	430.162	9.427	NA	S2962390	HMDB0038931	0.001	2.3814	3	Lignans, neolignans and related compounds	Furanoid lignans	null	other
9.481_346.2517	0.0044	0.0612	0.2141	DOR:NOR	C18:neg	6-(pentadeca-(8e)-enyl)salicylic acid	C22 H34 O3	346.252	9.481	NA	S4476443	HMDB0033897	-9e-04	-2.508	6	Benzenoids	Benzene and substituted derivatives	Benzoic acids and derivatives	other
9.487_298.2514	0.1905	0.2186	0.4188	DOR:NOR	C18:neg	Rg1300000	C18 H34 O3	298.251	9.487	C19418	S15081	HMDB0061650	-6e-04	-2.0754	8	Lipids and lipid-like molecules	Fatty Acyls	Lineolic acids and derivatives	other
9.495_394.1798	1.4972	0.1431	0.341	DOR:NOR	C18:neg	Triamcinolone	C21 H27 F O6	394.18	9.495	NA	S29046	HMDB0014758	-6e-04	-1.5043	2	Lipids and lipid-like molecules	Steroids and steroid derivatives	Hydroxysteroids	other
9.551_324.267	0.0372	0.1155	0.3079	DOR:NOR	C18:neg	(11e)-15-oxo-11-icosenoic acid	C20 H36 O3	324.267	9.551	NA	S30776790	HMDB0029797	-5e-04	-1.5472	3	Lipids and lipid-like molecules	Fatty Acyls	Fatty acids and conjugates	other
9.57_272.2358	0.7501	0.3901	0.4847	DOR:NOR	C18:neg	16-hydroxyhexadecanoic acid	C16 H32 O3	272.236	9.57	C18218	M2551	NA	-6e-04	-2.2431	12	Lipids and lipid-like molecules	Fatty Acyls	Fatty acids and conjugates	other
9.58_396.2519	6.5929	0.2427	0.4365	DOR:NOR	C18:neg	NA	C23 H32 N4 O2	396.252	9.58	NA	NA	NA	NA	NA	0	NA	NA	NA	other
9.634_408.1955	1.5703	0.1829	0.4102	DOR:NOR	C18:neg	3'-geranyl-2',3,4,4'-tetrahydroxychalcone	C25 H28 O5	408.195	9.634	NA	S9916894	HMDB0035255	-0.0018	-4.4428	32	Phenylpropanoids and polyketides	Linear 1,3-diarylpropanoids	Chalcones and dihydrochalcones	other
9.636_340.208	1.3725	0.387	0.4847	DOR:NOR	C18:neg	NA	C19 H32 O3 S	340.208	9.636	NA	NA	NA	NA	NA	0	NA	NA	NA	other
9.646_501.2864	0.0486	0.0845	0.2468	DOR:NOR	C18:neg	1-arachidonoyl-sn-glycero-3-phosphoethanolamine	C25 H44 N O7 P	501.286	9.646	NA	S21403171	HMDB0011517	-9e-04	-1.77	4	Lipids and lipid-like molecules	Glycerophospholipids	Glycerophosphoethanolamines	other
9.651_654.31	36.4981	0.3099	0.4847	DOR:NOR	C18:neg	NA	C34 H48 N4 O5 P2	654.31	9.651	NA	NA	NA	NA	NA	0	NA	NA	NA	other
9.697_298.2514	0.1829	0.1389	0.3376	DOR:NOR	C18:neg	Rg1300000	C18 H34 O3	298.251	9.697	C19418	S15081	HMDB0061650	-6e-04	-1.8884	8	Lipids and lipid-like molecules	Fatty Acyls	Lineolic acids and derivatives	other
9.725_530.2887	0.7452	0.1529	0.3596	DOR:NOR	C18:neg	(2e,2'e)-4,4'-{[(2e,6e,10e,14e)-2,6,10,14-tetramethyl-2,6,10,14-hexadecatetraene-1,16-diyl]bis(oxy)}bis(3-methyl-4-oxo-2-butenoic acid)	C30 H42 O8	530.289	9.725	NA	S30776826	HMDB0030363	-8e-04	-1.4461	2	Lipids and lipid-like molecules	Prenol lipids	Diterpenoids	other
9.756_486.2906	0.5535	0.3096	0.4847	DOR:NOR	C18:neg	NA	C29 H43 O4 P	486.291	9.756	NA	NA	NA	NA	NA	0	NA	NA	NA	other
9.765_302.2252	0.062	0.0327	0.1821	DOR:NOR	C18:neg	Cis-5,8,11,14,17-eicosapentaenoic acid	C20 H30 O2	302.225	9.765	C06428	M348	NA	-6e-04	-2.0679	13	Lipids and lipid-like molecules	Fatty Acyls	Fatty acids and conjugates	down
9.772_426.266	0.6432	0.2522	0.4427	DOR:NOR	C18:neg	NA	C19 H43 N2 O4 P S	426.266	9.772	NA	NA	NA	NA	NA	0	NA	NA	NA	other
9.8_278.2251	0.0542	0.0024	0.0902	DOR:NOR	C18:neg	Elaidolinolenic acid	C18 H30 O2	278.225	9.8	NA	S4445949	NA	-5e-04	-1.9125	5	NA	NA	NA	down
9.888_254.225	0.0651	0.0006	0.0701	DOR:NOR	C18:neg	Palmitoleic acid	C16 H30 O2	254.225	9.888	C08362	M1256	NA	-4e-04	-1.7489	13	Lipids and lipid-like molecules	Fatty Acyls	Fatty acids and conjugates	down
9.89_474.2906	0.459	0.0743	0.2296	DOR:NOR	C18:neg	NA	C28 H43 O4 P	474.291	9.89	NA	NA	NA	NA	NA	0	NA	NA	NA	other
9.91_567.3547	0.0193	0.0214	0.1611	DOR:NOR	C18:neg	NA	C26 H55 N3 O6 P2	567.355	9.91	NA	NA	NA	NA	NA	0	NA	NA	NA	down
9.921_479.3018	0.0265	0.0221	0.1611	DOR:NOR	C18:neg	1-oleoyl-sn-glycero-3-phosphoethanolamine	C23 H46 N O7 P	479.302	9.921	NA	S7826021	HMDB0011506	-6e-04	-1.3014	4	Lipids and lipid-like molecules	Glycerophospholipids	Glycerophosphoethanolamines	down
9.924_541.3387	0.0386	0.0204	0.1611	DOR:NOR	C18:neg	NA	C25 H52 N O9 P	541.339	9.924	NA	NA	NA	NA	NA	0	NA	NA	NA	down
9.93_424.2834	0.0252	0.0354	0.1825	DOR:NOR	C18:neg	1beta-hydroxycholic acid	C24 H40 O6	424.283	9.93	NA	S4446981	HMDB0000307	-9e-04	-2.0462	7	Lipids and lipid-like molecules	Steroids and steroid derivatives	Bile acids, alcohols and derivatives	down
9.933_453.2864	0.0513	0.0569	0.2055	DOR:NOR	C18:neg	Glycerophospho-n-palmitoyl ethanolamine	C21 H44 N O7 P	453.286	9.933	NA	M2955	NA	-8e-04	-1.8439	2	NA	NA	NA	other
9.933_671.4023	0.0309	0.2976	0.4847	DOR:NOR	C18:neg	NA	C32 H58 N5 O8 P	671.402	9.933	NA	NA	NA	NA	NA	0	NA	NA	NA	other
9.944_328.241	0.0506	0.0539	0.2055	DOR:NOR	C18:neg	Docosahexaenoic acid	C22 H32 O2	328.241	9.944	C06429	S393183	HMDB0002183	-7e-04	-2.2087	6	Lipids and lipid-like molecules	Fatty Acyls	Fatty acids and conjugates	other
9.944_396.2283	0.0571	0.0562	0.2055	DOR:NOR	C18:neg	(9s,10s)-10-hydroxy-9-(phosphonooxy)octadecanoic acid	C18 H37 O7 P	396.228	9.944	NA	S21865665	HMDB0059632	-6e-04	-1.5717	2	Lipids and lipid-like molecules	Fatty Acyls	Fatty acids and conjugates	other
0.61_353.9758	0.0102	0.0254	0.1671	DOR:NOR	C18:neg	NA	C6 H12 O13 P2	353.976	0.61	NA	NA	NA	NA	NA	0	NA	NA	NA	down
0.612_276.025	0.02	0.0027	0.0902	DOR:NOR	C18:neg	6-o-phosphono-d-gluconic acid	C6 H13 O10 P	276.025	0.612	C00345	S82615	HMDB0001316	-4e-04	-1.3957	2	Organic oxygen compounds	Organooxygen compounds	Carbohydrates and carbohydrate conjugates	down
0.615_195.9343	13.446	0.1218	0.3187	DOR:NOR	C18:neg	NA	C4 H6 O P2 S2	195.934	0.615	NA	NA	NA	NA	NA	0	NA	NA	NA	other
0.617_265.95	0.0222	0.0014	0.0902	DOR:NOR	C18:neg	NA	C3 H7 O10 P S	265.95	0.617	NA	NA	NA	NA	NA	0	NA	NA	NA	down
0.618_283.9606	0.0199	0.0033	0.0902	DOR:NOR	C18:neg	NA	C3 H9 O11 P S	283.961	0.618	NA	NA	NA	NA	NA	0	NA	NA	NA	down
0.618_299.9379	0.0066	0.0043	0.0902	DOR:NOR	C18:neg	NA	C3 H9 O10 P S2	299.938	0.618	NA	NA	NA	NA	NA	0	NA	NA	NA	down
0.621_185.9925	0.0132	0.003	0.0902	DOR:NOR	C18:neg	2-phosphoglycerate	C3 H7 O7 P	185.993	0.621	NA	BGI76	NA	4e-04	2.2918	4	NA	NA	NA	down
0.626_192.0265	2.2029	0.2656	0.4552	DOR:NOR	C18:neg	Citrate	C6 H8 O7	192.026	0.626	C00158	BGI188	NA	5e-04	2.364	8	Organic acids and derivatives	Carboxylic acids and derivatives	Tricarboxylic acids and derivatives	other
0.627_134.0207	0.6227	0.4566	0.5092	DOR:NOR	C18:neg	NA	NA	134.021	0.627	NA	NA	NA	NA	NA	0	NA	NA	NA	other
0.634_235.8669	47.5799	0.2732	0.461	DOR:NOR	C18:neg	NA	C H O6 P S3	235.867	0.634	NA	NA	NA	NA	NA	0	NA	NA	NA	other
0.635_333.8534	1.4023	0.6766	0.7083	DOR:NOR	C18:neg	NA	C2 H7 O7 P S5	333.853	0.635	NA	NA	NA	NA	NA	0	NA	NA	NA	other
0.636_196.058	0.0209	0.0439	0.1914	DOR:NOR	C18:neg	Gluconic acid	C6 H12 O7	196.058	0.636	C00257	BGI281	NA	3e-04	1.5549	3	Organic oxygen compounds	Organooxygen compounds	Carbohydrates and carbohydrate conjugates	down
0.639_473.7497	1.7961	0.3243	0.4847	DOR:NOR	C18:neg	NA	C3 H6 Cl O9 P3 S5	473.75	0.639	NA	NA	NA	NA	NA	0	NA	NA	NA	other
0.64_166.0471	0.0405	0.0468	0.1929	DOR:NOR	C18:neg	Arabonic acid	C5 H10 O6	166.047	0.64	NA	S108861	HMDB0000539	7e-04	4.1098	4	Organic oxygen compounds	Organooxygen compounds	Carbohydrates and carbohydrate conjugates	down
0.644_353.7908	2.0929	0.1201	0.3187	DOR:NOR	C18:neg	NA	C3 H2 Cl N2 O2 P3 S4	353.791	0.644	NA	NA	NA	NA	NA	0	NA	NA	NA	other
0.645_165.9637	0.7631	0.0995	0.2798	DOR:NOR	C18:neg	NA	C H4 N4 P2 S	165.964	0.645	NA	NA	NA	NA	NA	0	NA	NA	NA	other
0.646_223.9228	0.9857	0.9105	0.9248	DOR:NOR	C18:neg	NA	C4 H4 Cl N2 O P3	223.923	0.646	NA	NA	NA	NA	NA	0	NA	NA	NA	other
0.646_226.9938	0.104	0.0076	0.1245	DOR:NOR	C18:neg	NA	C6 H13 Cl N P3	226.994	0.646	NA	NA	NA	NA	NA	0	NA	NA	NA	down
0.646_295.8322	2.6237	0.0765	0.234	DOR:NOR	C18:neg	NA	C6 H O2 P S5	295.832	0.646	NA	NA	NA	NA	NA	0	NA	NA	NA	other
0.648_361.8228	2.0021	0.042	0.1874	DOR:NOR	C18:neg	NA	C2 H5 Cl N2 O5 P2 S4	361.823	0.648	NA	NA	NA	NA	NA	0	NA	NA	NA	up
0.648_421.7783	1.4401	0.3373	0.4847	DOR:NOR	C18:neg	NA	C3 H Cl O12 P2 S3	421.778	0.648	NA	NA	NA	NA	NA	0	NA	NA	NA	other
0.648_471.7052	1.4308	0.395	0.4847	DOR:NOR	C18:neg	NA	NA	471.705	0.648	NA	NA	NA	NA	NA	0	NA	NA	NA	other
0.65_303.8638	1.6182	0.169	0.3896	DOR:NOR	C18:neg	NA	C3 H3 Cl N4 O P2 S3	303.864	0.65	NA	NA	NA	NA	NA	0	NA	NA	NA	other
0.653_245.905	1.4122	0.4832	0.5317	DOR:NOR	C18:neg	NA	C4 H3 Cl O6 S2	245.905	0.653	NA	NA	NA	NA	NA	0	NA	NA	NA	other
0.653_363.8196	1.2977	0.6461	0.6788	DOR:NOR	C18:neg	NA	C2 H4 Cl O9 P3 S2	363.82	0.653	NA	NA	NA	NA	NA	0	NA	NA	NA	other
0.654_337.7962	1.8613	0.0551	0.2055	DOR:NOR	C18:neg	NA	C3 H2 Cl N2 O P3 S4	337.796	0.654	NA	NA	NA	NA	NA	0	NA	NA	NA	other
0.655_397.7519	1.9405	0.0687	0.2247	DOR:NOR	C18:neg	NA	C H2 Cl O8 P3 S4	397.752	0.655	NA	NA	NA	NA	NA	0	NA	NA	NA	other
0.655_679.5135	2.9147	0.0536	0.2055	DOR:NOR	C18:neg	NA	NA	679.514	0.655	NA	NA	NA	NA	NA	0	NA	NA	NA	other
0.656_216.0399	1.1802	0.7195	0.7478	DOR:NOR	C18:neg	NA	C6 H13 Cl O6	216.04	0.656	NA	NA	NA	NA	NA	0	NA	NA	NA	other
0.656_221.8784	2.0558	0.0102	0.1372	DOR:NOR	C18:neg	NA	C5 H2 Cl P3 S	221.878	0.656	NA	NA	NA	NA	NA	0	NA	NA	NA	up
0.656_371.8514	1.5677	0.1947	0.417	DOR:NOR	C18:neg	NA	C5 H7 Cl O7 P2 S3	371.851	0.656	NA	NA	NA	NA	NA	0	NA	NA	NA	other
0.656_405.7836	2.5399	0.0256	0.1671	DOR:NOR	C18:neg	NA	C3 H Cl O11 P2 S3	405.784	0.656	NA	NA	NA	NA	NA	0	NA	NA	NA	up
0.657_345.8279	1.735	0.0136	0.1591	DOR:NOR	C18:neg	NA	NA	345.828	0.657	NA	NA	NA	NA	NA	0	NA	NA	NA	up
0.657_347.8249	2.042	0.0456	0.1919	DOR:NOR	C18:neg	NA	C4 H2 Cl N4 O P S5	347.825	0.657	NA	NA	NA	NA	NA	0	NA	NA	NA	up
0.657_531.7295	2.1837	0.026	0.1678	DOR:NOR	C18:neg	NA	C4 H3 Cl O14 P2 S5	531.73	0.657	NA	NA	NA	NA	NA	0	NA	NA	NA	up
0.657_583.6536	2.4339	0.0393	0.1831	DOR:NOR	C18:neg	NA	NA	583.654	0.657	NA	NA	NA	NA	NA	0	NA	NA	NA	up
0.657_589.6884	1.6457	0.203	0.4188	DOR:NOR	C18:neg	NA	C5 H2 Cl O15 P3 S5	589.688	0.657	NA	NA	NA	NA	NA	0	NA	NA	NA	other
0.658_287.8693	2.0671	0.0381	0.1825	DOR:NOR	C18:neg	NA	NA	287.869	0.658	NA	NA	NA	NA	NA	0	NA	NA	NA	up
0.658_289.8663	2.213	0.0488	0.1983	DOR:NOR	C18:neg	NA	C2 H Cl N4 O3 P2 S2	289.866	0.658	NA	NA	NA	NA	NA	0	NA	NA	NA	up
0.658_415.8125	2.0252	0.0805	0.2374	DOR:NOR	C18:neg	NA	C10 H8 Cl P3 S5	415.812	0.658	NA	NA	NA	NA	NA	0	NA	NA	NA	other
0.658_473.7708	2.3696	0.0232	0.1611	DOR:NOR	C18:neg	NA	C2 H5 Cl N2 O10 P2 S5	473.771	0.658	NA	NA	NA	NA	NA	0	NA	NA	NA	up
0.659_355.8568	2.0194	0.0105	0.1393	DOR:NOR	C18:neg	NA	C3 H3 O12 P3 S	355.857	0.659	NA	NA	NA	NA	NA	0	NA	NA	NA	up
0.659_357.8538	1.8739	0.0628	0.216	DOR:NOR	C18:neg	NA	C4 H5 Cl O9 P2 S2	357.854	0.659	NA	NA	NA	NA	NA	0	NA	NA	NA	other
0.659_439.8385	0.9413	0.743	0.7694	DOR:NOR	C18:neg	NA	C3 H7 Cl N2 O11 P2 S3	439.839	0.659	NA	NA	NA	NA	NA	0	NA	NA	NA	other
0.659_599.7175	1.8246	0.1277	0.3254	DOR:NOR	C18:neg	NA	NA	599.717	0.659	NA	NA	NA	NA	NA	0	NA	NA	NA	other
0.659_717.6303	1.9521	0.0722	0.2268	DOR:NOR	C18:neg	NA	C42 H89 N O3 P2	717.63	0.659	NA	NA	NA	NA	NA	0	NA	NA	NA	other
0.66_171.951	1.4679	0.0657	0.2218	DOR:NOR	C18:neg	NA	C3 H6 Cl O2 P S	171.951	0.66	NA	NA	NA	NA	NA	0	NA	NA	NA	other
0.66_541.7585	2.1365	0.0317	0.1821	DOR:NOR	C18:neg	NA	C6 H4 Cl O15 P S5	541.759	0.66	NA	NA	NA	NA	NA	0	NA	NA	NA	up
0.66_647.6475	1.5092	0.2443	0.4368	DOR:NOR	C18:neg	NA	NA	647.648	0.66	NA	NA	NA	NA	NA	0	NA	NA	NA	other
0.661_297.898	1.7991	0.0365	0.1825	DOR:NOR	C18:neg	NA	C5 H12 Cl P S5	297.898	0.661	NA	NA	NA	NA	NA	0	NA	NA	NA	up
0.661_423.8443	1.0591	0.7871	0.8058	DOR:NOR	C18:neg	NA	C6 H3 O14 P3 S	423.844	0.661	NA	NA	NA	NA	NA	0	NA	NA	NA	other
0.661_481.8028	1.5188	0.0394	0.1831	DOR:NOR	C18:neg	NA	NA	481.803	0.661	NA	NA	NA	NA	NA	0	NA	NA	NA	up
0.661_483.7998	2.11	0.0309	0.1821	DOR:NOR	C18:neg	NA	C4 H8 Cl N2 O9 P3 S4	483.8	0.661	NA	NA	NA	NA	NA	0	NA	NA	NA	up
0.661_609.7464	1.8373	0.0671	0.2228	DOR:NOR	C18:neg	NA	C3 H5 Cl N4 O16 P2 S5	609.746	0.661	NA	NA	NA	NA	NA	0	NA	NA	NA	other
0.661_667.705	1.5991	0.1095	0.2974	DOR:NOR	C18:neg	NA	C4 H4 Cl N4 O17 P3 S5	667.705	0.661	NA	NA	NA	NA	NA	0	NA	NA	NA	other
0.662_146.1049	0.1052	0.0885	0.2559	DOR:NOR	C18:neg	Dl-lysine	C6 H14 N2 O2	146.105	0.662	NA	S843	HMDB0142894	7e-04	4.5047	5	Organic acids and derivatives	Carboxylic acids and derivatives	Amino acids, peptides, and analogues	other
0.662_365.8855	1.7101	0.0347	0.1825	DOR:NOR	C18:neg	NA	C10 H7 Cl N2 O S5	365.885	0.662	NA	NA	NA	NA	NA	0	NA	NA	NA	up
0.662_659.6731	1.4129	0.1963	0.4178	DOR:NOR	C18:neg	NA	NA	659.673	0.662	NA	NA	NA	NA	NA	0	NA	NA	NA	other
0.663_163.0006	0.1348	0.0643	0.2199	DOR:NOR	C18:neg	NA	NA	163.001	0.663	NA	NA	NA	NA	NA	0	NA	NA	NA	other
0.663_239.9391	1.7379	0.0254	0.1671	DOR:NOR	C18:neg	NA	C2 H4 Cl N6 P3	239.939	0.663	NA	NA	NA	NA	NA	0	NA	NA	NA	up
0.663_493.8286	1.3482	0.1363	0.3352	DOR:NOR	C18:neg	NA	C6 H6 Cl O16 P3 S	493.829	0.663	NA	NA	NA	NA	NA	0	NA	NA	NA	other
0.663_551.7872	1.681	0.0743	0.2296	DOR:NOR	C18:neg	NA	C2 H6 Cl N4 O15 P S5	551.787	0.663	NA	NA	NA	NA	NA	0	NA	NA	NA	other
0.663_727.6605	2.0252	0.1754	0.3981	DOR:NOR	C18:neg	NA	NA	727.66	0.663	NA	NA	NA	NA	NA	0	NA	NA	NA	other
0.664_313.8927	1.285	0.3573	0.4847	DOR:NOR	C18:neg	NA	C3 H6 Cl O9 P3	313.893	0.664	NA	NA	NA	NA	NA	0	NA	NA	NA	other
0.664_425.8412	1.3223	0.1395	0.3378	DOR:NOR	C18:neg	NA	C5 H6 Cl N4 O5 P3 S3	425.841	0.664	NA	NA	NA	NA	NA	0	NA	NA	NA	other
0.664_491.8317	2.0583	0.1121	0.3015	DOR:NOR	C18:neg	NA	C7 H11 Cl N2 O7 P2 S5	491.832	0.664	NA	NA	NA	NA	NA	0	NA	NA	NA	other
0.665_242.0991	0.0314	0.0056	0.1022	DOR:NOR	C18:neg	NA	C6 H21 N4 P3	242.099	0.665	NA	NA	NA	NA	NA	0	NA	NA	NA	down
0.665_433.8729	1.6943	0.1045	0.2864	DOR:NOR	C18:neg	NA	C6 H14 Cl N2 O4 P3 S4	433.873	0.665	NA	NA	NA	NA	NA	0	NA	NA	NA	other
0.666_307.9269	1.5992	0.0376	0.1825	DOR:NOR	C18:neg	NA	C5 H10 Cl N2 O3 P S3	307.927	0.666	NA	NA	NA	NA	NA	0	NA	NA	NA	up
0.666_617.7779	1.3219	0.1295	0.3272	DOR:NOR	C18:neg	NA	NA	617.778	0.666	NA	NA	NA	NA	NA	0	NA	NA	NA	other
0.666_619.7751	1.6686	0.1432	0.341	DOR:NOR	C18:neg	NA	C3 H11 Cl N2 O18 P2 S5	619.775	0.666	NA	NA	NA	NA	NA	0	NA	NA	NA	other
0.666_677.7334	1.4924	0.1352	0.3352	DOR:NOR	C18:neg	NA	C6 H5 Cl N4 O18 P2 S5	677.733	0.666	NA	NA	NA	NA	NA	0	NA	NA	NA	other
0.667_232.0705	0.1319	0.0084	0.1265	DOR:NOR	C18:neg	NA	C8 H12 N2 O6	232.071	0.667	NA	NA	NA	NA	NA	0	NA	NA	NA	down
0.667_375.9143	1.5608	0.071	0.2268	DOR:NOR	C18:neg	NA	C5 H7 Cl N6 O4 P2 S2	375.914	0.667	NA	NA	NA	NA	NA	0	NA	NA	NA	other
0.667_501.8603	1.6492	0.0531	0.2055	DOR:NOR	C18:neg	NA	C8 H8 Cl N2 O13 P S3	501.86	0.667	NA	NA	NA	NA	NA	0	NA	NA	NA	other
0.667_559.819	1.5942	0.3566	0.4847	DOR:NOR	C18:neg	NA	C11 H3 N2 O15 P3 S2	559.819	0.667	NA	NA	NA	NA	NA	0	NA	NA	NA	other
0.667_617.2432	36.5062	0.3244	0.4847	DOR:NOR	C18:neg	NA	C23 H47 Cl N5 O6 P3	617.243	0.667	NA	NA	NA	NA	NA	0	NA	NA	NA	other
0.668_181.9799	1.3845	0.0801	0.2374	DOR:NOR	C18:neg	NA	C4 H7 O4 P S	181.98	0.668	NA	NA	NA	NA	NA	0	NA	NA	NA	other
