# Supplementary material for: Using bioinformatics and metabolomics to identify altered granulosa cells in patients with diminished ovarian reserve
Source: PeerJ. 2020 Aug 28;8:e9812. doi: 10.7717/peerj.9812 (PMC7457930; doi:10.7717/peerj.9812)
Supplement: Supplemental Information 7 [file peerj-08-9812-s007.xlsx]

## Sheet: Sheet1
Name of miRNA	Fold Change	False Discovery Rate (q value)
	NOR vs. DOR
miR-21-3p	4.8	0.022
miR-31-5p	5.1	0.013
miR-30a-5p	5.2	0.019
miR-23b-3p	5.5	0.024
miR-132-3p	5.9	0.004
miR-212-3p	6.2	0.006
miR-450b-5p	6.4	0.008
miR-497-5p	6.8	0.003
miR-509-3p	7.3	0.001
miR-125b-2-3p	7.6	0.003
miR-411-5p	8.1	0.013
miR-127-3p	8.3	0.011
miR-99a-5p	9.3	0.002
miR-508-3p	9.6	0
miR-381-3p	9.9	0.004
miR-99b-5p	10.1	0.003
miR-30a-3p	13.8	0.001
miR-193b-3p	20	0
miR-202-5p	34.4	0
miR-424-5p	39.3	0
miR-4732-3p	-52.4	0.0001
miR-3158-3p	-24.3	0.0004
miR-486-3p	-21.5	0.001
miR-3615	-19.1	0.001
miR-150-5p	-18.5	0
miR-18a-3p	-15.6	0.002
miR-92a-3p	-14.7	0.001
miR-484	-13.8	0.001
miR-16-2-3p	-13.8	0.001
miR-423-5p	-12.8	0.001
miR-425-5p	-12.8	0.001
miR-454-5p	-11.9	0.002
miR-128-3p	-11.7	0.001
miR-486-5p	-11	0.006
miR-15a-5p	-10.8	0.002
miR-363-3p	-10.8	0.005
miR-92b-3p	-10.8	0.002
let-7d-5p	-10.4	0.002
miR-342-5p	-10.4	0.001
miR-107	-9.9	0.003
miR-652-3p	-9.4	0.005
let-7i-5p	-9.4	0.002
miR-144-5p	-9.3	0.006
miR-194-5p	-9.2	0.004
miR-584-5p	-9	0.018
miR-25-3p	-8.6	0.006
let-7f-5p	-8.6	0.002
miR-423-3p	-8.4	0.001
miR-345-5p	-8.4	0.001
miR-93-5p	-8.3	0.006
miR-589-5p	-7.9	0.003
miR-7706	-7.8	0.002
miR-106b-3p	-7.7	0.006
miR-576-5p	-7.4	0.008
let-7g-5p	-7.3	0.006
miR-126-3p	-7.2	0.011
miR-17-3p	-7.1	0.006
miR-126-5p	-7.1	0.012
miR-16-5p	-7.1	0.009
miR-196b-5p	-6.9	0.025
miR-103a-3p	-6.8	0.008
miR-361-3p	-6.7	0.003
let-7d-3p	-6.7	0.003
miR-32-5p	-6.6	0.008
miR-320b	-6.4	0.006
miR-181a-5p	-6.4	0.009
miR-532-5p	-6.3	0.009
miR-130b-3p	-6.3	0.007
let-7a-5p	-6.2	0.01
miR-181c-5p	-6.1	0.017
miR-142-5p	-6	0.014
miR-106b-5p	-5.9	0.015
miR-29c-3p	-5.9	0.008
miR-106a-5p	-5.6	0.033
miR-192-5p	-5.4	0.022
miR-378a-3p	-5.4	0.004
miR-181b-5p	-5.3	0.008
miR-144-3p	-5.2	0.032
miR-186-5p	-5.1	0.014
miR-421	-5	0.01
miR-222-3p	-5	0.003
miR-1307-3p	-4.9	0.012
miR-26b-5p	-4.8	0.029
miR-101-3p	-4.8	0.027
miR-548k	-4.8	0.02
miR-941	-4.8	0.025
miR-22-3p	-4.7	0.019
miR-454-3p	-4.4	0.034
miR-155-5p	-4.3	0.015
let-7b-5p	-4.3	0.03
miR-30c-5p	-4.3	0.016
miR-320a	-4.3	0.021
miR-140-3p	-4.2	0.036
miR-744-5p	-4.1	0.012
miR-142-3p	-4	0.032
miR-15b-3p	-4	0.047
miR-941	-3.9	0.045
miR-30e-5p	-3.9	0.042
miR-500a-3p	-3.9	0.02
miR-151a-5p	-3.9	0.044
miR-660-5p	-3.8	0.039
miR-221-3p	-3.7	0.038
miR-30d-5p	-3.7	0.047
miR-223-5p	-3.5	0.038
miR-339-3p	-3.4	0.039
